# Supplementary material
Source: PubMed Central journal article supplement (PMC8227465)

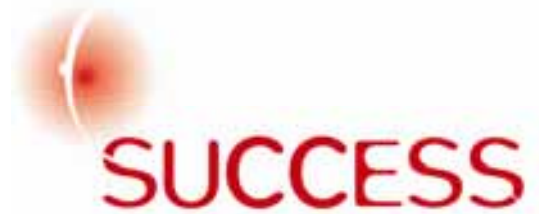

**Simultaneous Study of Gemcitabine-Docetaxel Combination  
adjuvant treatment, as well as Extended Bisphosphonate and  
Surveillance-Trial  
SUCCESS-Trial**

**SUCCESS-Trial** (**S**imultaneous **S**tudy of **G**emcitabine-**D**ocetaxel **C**ombination  
adjuvant treatment, as well as **E**xtended **B**isphosphonate and **S**urveillance-Trial)

An initiative of the **ADEBAR**-Study Group and the Frauenklinik  
Innenstadt, LMU Munich (Director Prof. Dr. K. Friese)

*In cooperation with*

**Nord-Ostdeutsche Gesellschaft für Gynäkologische Onkologie e.V.  
(NOGGO)**

**Berufsverband niedergelassener Gynäkologischer Onkologen in  
Deutschland e.V. (BNGO)**

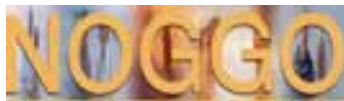

*Recommended by*

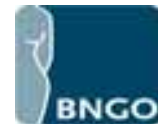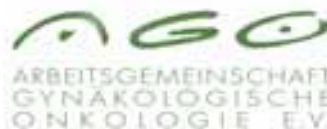

This study has been designed according to the 'International Conference on  
Harmonization Good Clinical Practice Guideline 1998'(1)

**Study Director:** Prof. Dr. H. Sommer (Sponsor)

**Co-Study Directors:**

Prof. Dr. M. W. Beckmann, Erlangen

Prof. Dr. W. Lichtenegger, Berlin

**SUCCESS Study Office**

I. Frauenklinik Innenstadt, Klinikum der LMU, Maistr. 11, 80337 München

Dr. E. Genss, Dr. M. Heinrigs, J. Jückstock, S. Dondl, A. Dörries

Phone: 089 - 5160- 4170 / - 4111

Fax: 089 - 5160 - 4715

eMail: [success@med.uni-muenchen.de](mailto:success@med.uni-muenchen.de)

### **Biometrics:**

T. Zwingers, estimate GmbH, Konrad-Adenauer-Allee 1, 86150 Augsburg,  
Phone: 0821 - 34662 - 0, Fax: 0821 - 34662 - 22

### **Randomisation and Monitoring:**

Alcedis GmbH  
Winchesterstr. 2 D-35394 Gießen (Europaviertel)  
Phone: +49 (0) 641-94436-0 Fax: +49 (0) 641-94436-70  
Email: mil@alcedis.de

### **Advisory Board: (Chair: Prof. Dr. A. Schneider)**

|           |           |                |            |
|-----------|-----------|----------------|------------|
| Prof. Dr. | Achim     | Schneider      | Berlin     |
| Prof. Dr. | Thomas    | Beck           | Rosenheim  |
| Dr. med.  | Dimitros  | Chatsipirois   | Mannheim   |
| Prof. Dr. | Peter     | Dall           | Düsseldorf |
| Prof. Dr. | Klaus     | Diedrich       | Lübeck     |
| Prof. Dr. | Johannes  | Dietl          | Würzburg   |
| Prof. Dr. | Günter    | Emons          | Göttingen  |
| Prof. Dr. | Rainer    | Fietkau        | Rostock    |
| Prof. Dr. | Klaus     | Friese         | München    |
| Prof. Dr. | Bernd     | Gerber         | Rostock    |
| Frau      | Ursula    | Goldmann-Posch | Augsburg   |
| Frau      | Renate    | Haidinger      | München    |
| Prof. Dr. | Jörn      | Hilfrich       | Hannover   |
| PD Dr.    | Peter     | Hillemanns     | Jena       |
| Prof. Dr. | Heinz     | Kölbl          | Mainz      |
| Prof. Dr. | Klaus     | Pantel         | Hamburg    |
| Prof. Dr. | Ingo      | Runnebaum      | München    |
| Prof. Dr. | Christoph | Sohn           | Heidelberg |
| Prof. Dr. | Thomas    | Steck          | Chemnitz   |
| Prof. Dr. | A. H.     | Tulusan        | Bayreuth   |
| Prof. Dr. | Clemens   | Unger          | Freiburg   |
| PD Dr.    | Michael   | Untch          | München    |
| Prof. Dr. | Diethelm  | Wallwiener     | Tübingen   |
| Prof. Dr. | Frederik  | Wenz           | Mannheim   |
| Prof. Dr. | Arthur    | Wischnik       | Augsburg   |
| Prof. Dr. | W.        | Jonat          | Kiel       |
| Prof. Dr. | Fritz     | Jänicke        | Hamburg    |

### **Steering Committee: (Chair: PD Dr. W. Janni, LKP)**

|           |      |              |            |
|-----------|------|--------------|------------|
| PD Dr.    | W.   | Janni        | München    |
| Dr.       | I.   | Bauerfeind   | München    |
| Dr.       | F.   | Beldermann   | Stuttgart  |
| Dr.       | R.   | Dengler      | Regensburg |
| Dr.       | P.   | Fasching     | Erlangen   |
| PD Dr.    | M.   | Friedrich    | Lübeck     |
| Dr.       | Anke | Kleine-Tebbe | Berlin     |
| Dr.       | T.   | Kuhn         | Stuttgart  |
| PD Dr.    | N.   | Maass        | Kiel       |
| Dr.       | B.   | Rack         | München    |
| PD Dr.    | A.   | Schneeweiß   | Heidelberg |
| PD Dr.    | J.   | Sehouli      | Berlin     |
| PD Dr.    | E.   | Solomayer    | Tübingen   |
| Dr.       | D.   | Steinfeld    | Augsburg   |
| Prof. Dr. | M.   | Sütterlin    | Würzburg   |
| Dr.       | J.   | de Waal      | Dachau     |

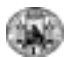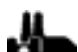

# Table of Contents

|                                                                             |           |
|-----------------------------------------------------------------------------|-----------|
| <b>Table of Contents</b> .....                                              | <b>3</b>  |
| <b>1 Study Synopsis</b> .....                                               | <b>9</b>  |
| <b>2 Background</b> .....                                                   | <b>11</b> |
| <b>2.1 Systemic Treatment of Primary Breast Cancer</b> .....                | <b>11</b> |
| <b>2.2 Anthracyclines in Adjuvant Therapy of Breast Cancer</b> .....        | <b>12</b> |
| <b>2.3 The Role of Taxanes in the Therapy of Breast Cancer</b> .....        | <b>15</b> |
| 2.3.1 Docetaxel in the Treatment of Metastatic Breast Cancer .....          | 15        |
| 2.3.2 Taxanes in the Adjuvant Treatment of Primary Breast Cancer.....       | 16        |
| 2.3.2.1 Paclitaxel in the Adjuvant Treatment of Primary Breast Cancer ..... | 16        |
| 2.3.2.2 Docetaxel in the Adjuvant Treatment of Primary Breast Cancer .....  | 19        |
| <b>2.4 Gemcitabine in the Treatment of Breast Cancer</b> .....              | <b>24</b> |
| 2.4.1 Gemcitabine as single agent and combination drug.....                 | 24        |
| 2.4.2 Gemcitabine in combination with taxanes in breast cancer.....         | 24        |
| <b>2.5 Endocrine Therapy</b> .....                                          | <b>32</b> |
| <b>2.6 Trastuzumab in the adjuvant treatment of breast cancer</b> .....     | <b>36</b> |
| <b>2.7 Bisphosphonates in the adjuvant treatment of breast cancer</b> ..... | <b>42</b> |
| <b>2.8 Radiotherapy</b> .....                                               | <b>48</b> |
| <b>3 Adjunct Scientific Program of this Study</b> .....                     | <b>50</b> |
| <b>3.1 Disseminated Tumor Cells in the Bone Marrow</b> .....                | <b>50</b> |
| <b>3.2 Disseminated Tumor Cells in Peripheral Blood</b> .....               | <b>57</b> |
| 3.2.1 Enrichment Techniques.....                                            | 57        |
| 3.2.2 Immunocytochemical Detection (ICC).....                               | 58        |
| 3.2.3 Molecular Detection Procedures .....                                  | 61        |
| 3.2.4 Flow cytometry .....                                                  | 64        |
| 3.2.5 Clonogenic culture assays .....                                       | 66        |
| <b>3.3 Comparison of the different techniques</b> .....                     | <b>66</b> |

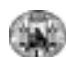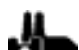

|            |                                                                                                                                                |           |
|------------|------------------------------------------------------------------------------------------------------------------------------------------------|-----------|
| <b>3.4</b> | <b>Additional Therapy Monitoring in Peripheral Blood</b> .....                                                                                 | <b>67</b> |
| 3.4.1      | Recommended Breast Cancer Surveillance according to 1998 American Society of Clinical Oncology Breast Cancer Surveillance Guidelines Summary.. | 68        |
| 3.4.2      | Breast Cancer Surveillance Testing – not recommended by ASCO.....                                                                              | 69        |
| <b>3.5</b> | <b>Translational Research Program to be conducted within Success</b> .....                                                                     | <b>72</b> |
| 3.5.1      | Detection of circulating tumor cells in peripheral blood.....                                                                                  | 72        |
| 3.5.1.1    | Detection of circulating tumor cells in peripheral blood by immunocytochemistry .....                                                          | 72        |
| 3.5.1.2    | Detection of circulating tumor cells in peripheral blood by flow-cytometry.....                                                                | 72        |
| 3.5.2      | Detection of tumor markers.....                                                                                                                | 73        |
| 3.5.3      | Association of genomic variability with antitumor efficacy and systemic toxicity                                                               | 73        |
| 3.5.4      | Characterization of genetic alterations in peripheral blood of breast cancer patients .....                                                    | 75        |
| 3.5.4.1    | Methods for the detection of genomic alterations.....                                                                                          | 75        |
| 3.5.4.2    | Previous results of genomic alterations.....                                                                                                   | 76        |
| 3.5.5      | Peripheral Blood Sampling.....                                                                                                                 | 77        |
| <b>4</b>   | <b>Objectives</b> .....                                                                                                                        | <b>78</b> |
| 4.1        | <b>Primary Objective</b> .....                                                                                                                 | <b>78</b> |
| 4.2        | <b>Secondary Objectives</b> .....                                                                                                              | <b>78</b> |
| 4.3        | <b>Additional Scientific Objectives</b> .....                                                                                                  | <b>78</b> |
| <b>5</b>   | <b>Investigational Plan</b> .....                                                                                                              | <b>79</b> |
| 5.1        | <b>Summary of Study Design</b> .....                                                                                                           | <b>79</b> |
| 5.2        | <b>Discussion of Design and Control</b> .....                                                                                                  | <b>82</b> |
| 5.3        | <b>Investigator Information</b> .....                                                                                                          | <b>82</b> |
| 5.3.1      | Final Report Signature.....                                                                                                                    | 82        |
| 5.4        | <b>Study Population</b> .....                                                                                                                  | <b>82</b> |
| 5.4.1      | Entry Procedures .....                                                                                                                         | 82        |
| 5.4.2      | Criteria for Enrollment.....                                                                                                                   | 83        |

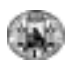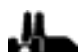

|             |                                                                  |            |
|-------------|------------------------------------------------------------------|------------|
| 5.4.3       | Inclusion Criteria .....                                         | 84         |
| 5.4.4       | Exclusion Criteria .....                                         | 84         |
| 5.4.5       | Violation of Criteria for Enrollment .....                       | 85         |
| 5.4.6       | Disease Diagnostic Criteria.....                                 | 85         |
| <b>5.5</b>  | <b>Patient Assignment .....</b>                                  | <b>86</b>  |
| <b>5.6</b>  | <b>Dosage and Administration.....</b>                            | <b>86</b>  |
| 5.6.1       | Materials and Supplies .....                                     | 86         |
| 5.6.1.1     | Docetaxel .....                                                  | 86         |
| 5.6.1.2     | Cyclophosphamide .....                                           | 87         |
| 5.6.1.3     | Fluorouracil .....                                               | 87         |
| 5.6.1.4     | Epirubicin.....                                                  | 88         |
| 5.6.1.5     | Gemcitabine.....                                                 | 90         |
| 5.6.1.6     | Tamoxifen.....                                                   | 91         |
| 5.6.1.7     | Anastrozole .....                                                | 92         |
| 5.6.1.8     | Zoledronate.....                                                 | 94         |
| 5.6.1.9     | Goserelin .....                                                  | 96         |
| 5.6.2       | Toxicity, Dosage Selection and Interval Modification .....       | 97         |
| 5.6.2.1     | Hematological Toxicity .....                                     | 97         |
| 5.6.2.2     | Non-hematological Toxicity .....                                 | 97         |
| 5.6.2.3     | Dosage Adjustments .....                                         | 98         |
| 5.6.2.3.1   | Dosage Adjustment Levels for <b>Randomization A</b> .....        | 98         |
| 5.6.2.3.2   | Dosage Adjustment Levels for <b>Randomization B</b> .....        | 98         |
| 5.6.2.4     | Interval Modification.....                                       | 99         |
| <b>5.7</b>  | <b>Endocrine Therapy .....</b>                                   | <b>100</b> |
| <b>5.8</b>  | <b>Radiotherapy.....</b>                                         | <b>100</b> |
| <b>5.9</b>  | <b>Randomization.....</b>                                        | <b>104</b> |
| <b>5.10</b> | <b>Blinding.....</b>                                             | <b>105</b> |
| <b>5.11</b> | <b>Concomitant Therapy.....</b>                                  | <b>106</b> |
| 5.11.1      | G-CSF .....                                                      | 106        |
| 5.11.2      | Oral antibiotic prophylaxis.....                                 | 107        |
| 5.11.3      | 5-HT <sub>3</sub> -Receptorantagonists and Glucocorticoids ..... | 107        |



|             |                                                             |            |
|-------------|-------------------------------------------------------------|------------|
| 5.11.4      | Premedication with Docetaxel .....                          | 108        |
| <b>5.12</b> | <b>Efficacy and Safety Evaluations.....</b>                 | <b>108</b> |
| 5.12.1      | Efficacy.....                                               | 108        |
|             | Examinations during the study .....                         | 108        |
| 5.12.1.1    | Efficacy Criteria .....                                     | 109        |
| 5.12.1.2    | Definition of Efficacy Measures .....                       | 110        |
| 5.12.2      | Safety .....                                                | 110        |
| 5.12.2.1    | Clinical Adverse Events .....                               | 110        |
|             | 5.12.2.1.1 Adverse Event Reporting Requirements .....       | 111        |
|             | 5.12.2.1.2 Serious Adverse Events .....                     | 111        |
| 5.12.3      | Additional translational research investigation .....       | 112        |
|             | 5.12.3.1 Peripheral Blood Sampling .....                    | 112        |
| 5.12.4      | Quality of life assessment.....                             | 112        |
| 5.12.5      | Follow-up .....                                             | 112        |
| 5.12.6      | Safety Monitoring .....                                     | 113        |
| 5.12.7      | Appropriateness and Consistency of Measurements.....        | 113        |
| <b>5.13</b> | <b>Patient Disposition Criteria.....</b>                    | <b>113</b> |
| 5.13.1      | Discontinuations .....                                      | 113        |
| 5.13.2      | Study Extensions.....                                       | 114        |
| <b>5.14</b> | <b>Compliance .....</b>                                     | <b>114</b> |
| <b>5.15</b> | <b>Quality Assurance.....</b>                               | <b>114</b> |
| <b>5.16</b> | <b>Patients' Insurance .....</b>                            | <b>115</b> |
| <b>6</b>    | <b>Statistical Methods.....</b>                             | <b>115</b> |
| <b>6.1</b>  | <b>Sample Size .....</b>                                    | <b>115</b> |
| <b>6.2</b>  | <b>Interim Analyses .....</b>                               | <b>117</b> |
|             | 6.2.1 Adjustment of significance levels .....               | 117        |
|             | 6.2.2 Premature Discontinuation – Early Stopping Rules..... | 117        |
| <b>6.3</b>  | <b>Data Analyses .....</b>                                  | <b>118</b> |
|             | 6.3.1 Independent Data and Safety Monitoring Board .....    | 118        |
|             | 6.3.2 General Considerations.....                           | 118        |

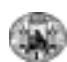

|            |                                                                                                                      |                   |
|------------|----------------------------------------------------------------------------------------------------------------------|-------------------|
| 6.3.3      | Study Populations.....                                                                                               | 119               |
| 6.3.4      | Patient Disposition.....                                                                                             | 119               |
| <b>6.4</b> | <b>Patient Characteristics .....</b>                                                                                 | <b>119</b>        |
| 6.4.1      | Efficacy Analyses.....                                                                                               | 120               |
| 6.4.2      | Safety Analyses .....                                                                                                | 120               |
| <b>6.5</b> | <b>General Considerations .....</b>                                                                                  | <b>120</b>        |
| <b>7</b>   | <b><i>Informed Consent, Ethical Review, Regulatory Considerations, Legal and Administrative Regulations.....</i></b> | <b><i>121</i></b> |
| <b>7.1</b> | <b>Informed Consent .....</b>                                                                                        | <b>121</b>        |
| <b>7.2</b> | <b>Ethical Review .....</b>                                                                                          | <b>121</b>        |
| <b>7.3</b> | <b>Regulatory Considerations .....</b>                                                                               | <b>121</b>        |
| <b>7.4</b> | <b>Legal and administrative regulations.....</b>                                                                     | <b>121</b>        |
| 7.4.1      | Good Clinical Practice.....                                                                                          | 121               |
| 7.4.2      | Patients' identification list .....                                                                                  | 122               |
| 7.4.3      | Storage of study documents .....                                                                                     | 122               |
| 7.4.4      | Financiation .....                                                                                                   | 122               |
| 7.4.5      | Amendment .....                                                                                                      | 123               |
| <b>8</b>   | <b><i>Appendix.....</i></b>                                                                                          | <b><i>124</i></b> |
| <b>8.1</b> | <b>German Protocol-synopsis .....</b>                                                                                | <b>124</b>        |
| 8.1.1.     | Zielsetzung der Studie.....                                                                                          | 125               |
| 8.1.2.     | Einschlusskriterien .....                                                                                            | 126               |
| 8.1.3.     | Ausschlusskriterien .....                                                                                            | 126               |
| 8.1.4.     | Studiendesign .....                                                                                                  | 127               |
| 8.1.5.     | Behandlungsplan.....                                                                                                 | 129               |
| 8.1.6.     | Allgemeine Empfehlungen zur Therapiedurchführung.....                                                                | 131               |
| 8.1.6.1.   | Komplikationen während der Neutropenie.....                                                                          | 132               |
| 8.1.7.     | Intervallverlängerung .....                                                                                          | 133               |
| 8.1.8.     | Empfehlungen zur Dosisreduktion.....                                                                                 | 133               |
| 8.1.8.1.   | Hämatologische Toxizität.....                                                                                        | 134               |
| 8.1.8.2.   | Nicht-hämatologische Toxizität .....                                                                                 | 134               |



|             |                                                                                                                   |            |
|-------------|-------------------------------------------------------------------------------------------------------------------|------------|
| 8.1.9.      | Begleittherapie .....                                                                                             | 135        |
| 8.1.10.     | Kontrolluntersuchungen .....                                                                                      | 135        |
| <b>8.2</b>  | <b>Quality of Life Survey (German).....</b>                                                                       | <b>138</b> |
| <b>8.3</b>  | <b>Eastern Cooperative Oncology Group (ECOG) Performance Status.....</b>                                          | <b>143</b> |
| <b>8.4</b>  | <b>TNM Staging for Breast Carcinoma .....</b>                                                                     | <b>144</b> |
| <b>8.5</b>  | <b>Informed Consent Document (German).....</b>                                                                    | <b>145</b> |
| <b>8.6</b>  | <b>Ethical board review.....</b>                                                                                  | <b>157</b> |
| <b>8.7</b>  | <b>Insurance policy .....</b>                                                                                     | <b>158</b> |
| <b>8.8</b>  | <b>Serious Adverse Event (SAE) form .....</b>                                                                     | <b>159</b> |
| <b>8.9</b>  | <b>Recommendations for the Prevention, Diagnosis and Treatment of<br/>Osteonecrosis of the Jaw (German) .....</b> | <b>160</b> |
| <b>8.10</b> | <b>Signatures .....</b>                                                                                           | <b>164</b> |
| 8.10.1      | Signature of the Clinical Investigator .....                                                                      | 164        |
| 8.10.2      | Signatures of the Sponsor and the Biometrist.....                                                                 | 164        |
| <b>8.11</b> | <b>Product informations (German).....</b>                                                                         | <b>165</b> |
| 8.11.1      | Docetaxel.....                                                                                                    | 165        |
| 8.11.2      | Gemcitabine .....                                                                                                 | 176        |
| 8.11.3      | Epirubicin .....                                                                                                  | 179        |
| 8.11.4      | Cyclophosphamide.....                                                                                             | 184        |
| 8.11.5      | Fluorouracil.....                                                                                                 | 188        |
| 8.11.6      | Anastrozole .....                                                                                                 | 192        |
| 8.11.7      | Zoledronate .....                                                                                                 | 195        |
| 8.11.8      | Lenograstim.....                                                                                                  | 201        |
| <b>8.12</b> | <b>Schedule for Necessary Examinations.....</b>                                                                   | <b>206</b> |
| <b>9</b>    | <b>References.....</b>                                                                                            | <b>207</b> |

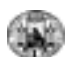



# 1 Study Synopsis

This is an open-label, multicenter, 2x2 factorial design, randomized controlled, Phase III study comparing the disease free survival after randomisation in patients treated with 3 cycles of Epirubicin-Fluorouracil-Cyclophosphamide(FEC)-chemotherapy, followed by 3 cycles of Docetaxel(D)-chemotherapy versus 3 cycles of Epirubicin-Fluorouracil-Cyclophosphamide(FEC), followed by 3 cycles of Gemcitabine-Docetaxel(DG)-chemotherapy, and to compare the disease free survival after randomisation in patients treated with 2 years of Zoledronate versus 5 years of Zoledronate in patients with early primary breast cancer. Patients will be required to have histopathological proof of axillary lymph node metastases (pN<sub>1-3</sub>) **or** high risk node negative, defined as: 'pT $\geq$ 2 **or** histopathological grade 3, **or** age  $\leq$  35 **or** negative hormone receptor', but are not allowed to have evidence of distant disease. Patients will have to be entered into the study no later than 6 weeks after complete resection of the primary tumor. No other antineoplastic treatment other than surgical treatment, the defined cytotoxic and endocrine treatment and radiotherapy will be allowed prior to study entry and during the course of the study.

After surgery, leading to R<sub>0</sub> resection of the invasive and intraductal components of the primary tumor, patients will be randomized to one of the following treatments:

## First randomization **A**

**AA:** 3 cycles of 5-Fluorouracil 500 mg/m<sup>2</sup> i.v. body surface area and Epirubicin 100 mg/m<sup>2</sup> i.v. and Cyclophosphamide 500 mg/m<sup>2</sup> i.v., (FEC100), each administered on day 1, repeated on day 22, subsequently followed by 3 cycles of Docetaxel 75 mg/m<sup>2</sup> body surface area i.v. (D), and Gemcitabine 1000 mg/m<sup>2</sup> i.v. (30 min infusion) (G), administered on day 1, followed by Gemcitabine 1000 mg/m<sup>2</sup> i.v. (30 min infusion) on day 8, repeated on day 22

**AB:** 3 cycles of 5-Fluorouracil 500 mg/m<sup>2</sup> i.v. body surface area and Epirubicin 100 mg/m<sup>2</sup> i.v. and Cyclophosphamide 500 mg/m<sup>2</sup> i.v., (FEC100), each administered on day 1, repeated on day 22, subsequently followed by 3 cycles of Docetaxel 100 mg/m<sup>2</sup> body surface area i.v. (D), administered on day 1, repeated on day 22

## Second randomization **B**

**BA:** Zoledronic acid 4 mg i.v., every 3 months for the duration of two years, subsequently followed by zoledronic acid 4 mg i.v., every 6 months for the duration of additional three years

**BB:** Zoledronic acid 4 mg i.v., every 3 months for the duration of two years

During the zoledronic acid treatment period, patients will receive 500 mg Calcium p.o. qid and 400 i.E. Vitamin D p.o. qid.

Patients with positive hormone receptor status ( $\geq$  10 % positively stained cells for estrogen and/or progesterone) of the primary tumor will receive **Tamoxifen**



treatment 20 mg p.o. per day for 2 years, after the end of chemotherapy. Subsequent to chemotherapy, postmenopausal patients with positive hormone receptor status will be treated with Anastrozole (Arimidex®) 1 mg p.o. for additional 3 years, premenopausal patients will continue Tamoxifen treatment for additional 3 years. In addition to tamoxifen, all patients with positive hormone receptor status of the primary tumor and under the age of 40 or restart of menstrual bleeding within 6 months after the completion of cytostatic treatment or with premenopausal hormone levels as defined below will receive **Goserelin** (Zoladex®) 3.6 mg subcutaneously every 4 weeks over a period of 2 years following chemotherapy.(2;3) Premenopausal endocrine status will be assumed, if the following serum levels are met: LH < 20 mIE/ml, FSH < 20 mIE/ml and E<sub>2</sub> > 20 pg/ml. Endocrine therapy will start after the end of chemotherapy.

All patients with breast conserving therapy or more than 3 axillary lymph node metastases or in the following cases after mastectomy:

- T3/T4-carcinoma
- T2-carcinoma > 3 cm
- multicentric tumor growth
- lymphangiosis carcinomatosa or vessel involvement
- involvement of the pectoralis fascia or a safety margin < 5 mm.(4) (5;6)

will receive adjuvant **radiotherapy**.

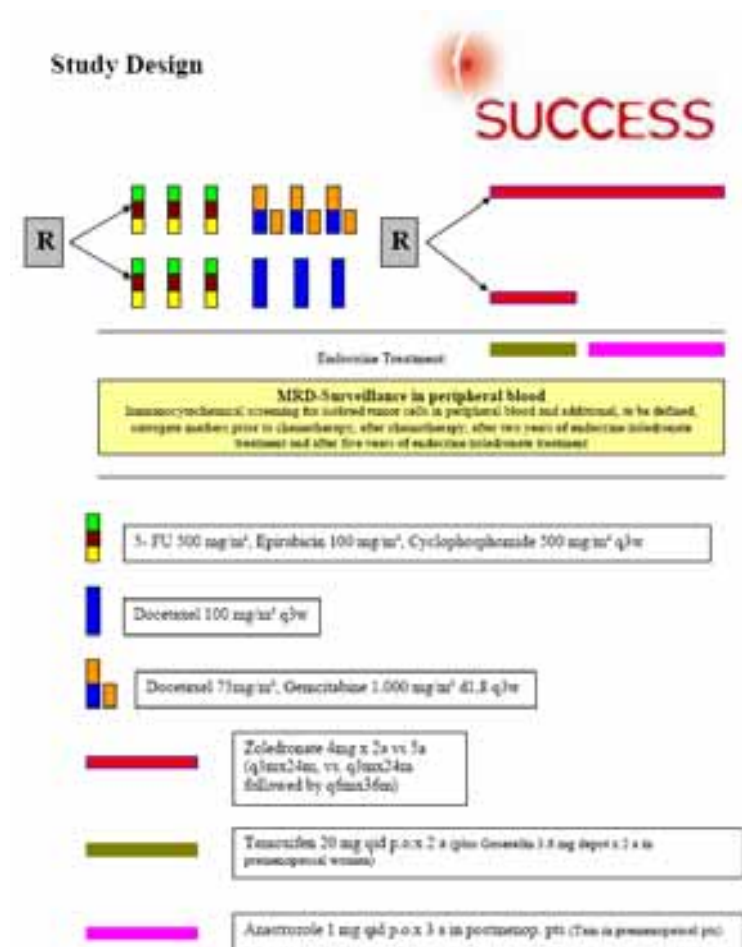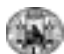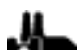

## 2 Background

### 2.1 Systemic Treatment of Primary Breast Cancer

Breast cancer is the most frequent malignoma of the female in all countries of the industrialized western hemisphere. Approximately 28 % of all malignancies in the countries of the European Community (EC) were attributed to neoplasms of the female breast. There were 73.557 deaths caused by breast cancer in the countries of the EC in 1990.(7) While the combination of locoregional and systemic treatment has early been shown to improve the prognosis of the disease considerably,(8) only 25 % of all patients will be cured after primary therapy.

Halsted's demand for radical mastectomy as treatment of choice for breast cancer dates back to the 1880's and was based on the understanding of breast cancer as a locoregional disease. This view was questioned by a series of studies between 1950 and 1970(9). These studies established the advantages of limited local therapy and finally led the way to breast conserving surgery and systemic treatment. Breast conserving treatment, once controversially discussed, is now an established alternative to modified radical mastectomy for surgically manageable breast cancer. Several prospective, randomized controlled trials have uniformly reported similar rates of distant disease free survival and overall survival after long-term follow-up(10-15). While one of the major concerns in breast conserving treatment is the risk for local recurrence, the literature reports wide variation ranging from 3% to 25%(16;17). This risk continuously increases with time at a yearly conditional event probability of approximately 1%(18). This is in contrast to chest wall recurrences, which predominantly take place within the first 3 years after primary treatment. However, local recurrences after breast conserving therapy stay without major impact on the overall survival of these patients.

Systemic treatment is widely accepted as adjuvant, integral part of primary therapy in patients with average to high risk for relapse according the St. Gallen risk criteria:(19)

**Table 1 St. Gallen Risk Criteria 2005**

| St. Gallen 2005 Risk Categories |                                                                                                                                                                                                                 |                          |
|---------------------------------|-----------------------------------------------------------------------------------------------------------------------------------------------------------------------------------------------------------------|--------------------------|
| Risk Category                   | Endocrine Responsive                                                                                                                                                                                            | Endocrine Non-Responsive |
| Lower Risk                      | <p>Node negative<br/>ER and/or PgR expressed, and<br/>all of the following features:<br/>pT ≤ 2 cm, and<br/>Grade 1, and<br/>Age &gt; 35 years and<br/>Absence of vessel invasion and<br/>HER-2neu negative</p> | Not Applicable*          |

\*Invasive cancer of specific types of tumor phenotypes  
e.g. medullary or ductal, or mucinoid cancer presenting as node-negative disease

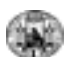

| St. Gallen 2005 Risk Categories |                                                                                                                                                                                                                                                              |                                               |
|---------------------------------|--------------------------------------------------------------------------------------------------------------------------------------------------------------------------------------------------------------------------------------------------------------|-----------------------------------------------|
| Risk Category                   | Endocrine Responsive                                                                                                                                                                                                                                         | Endocrine Non-Responsive                      |
| Intermediate Risk               | Node-negative<br>ER and/or PgR expressed, AND<br>at least one of the following<br>features:<br>pT > 2 cm, or Grade 2 - 3, or<br>Age < 35 years or HER2/neu pos. or<br>vessel invasion<br>Node-positive 1 - 3 if HER2/neu neg.<br>and without vessel invasion | Same features<br>plus<br>ER and PgR<br>absent |
| High Risk                       | Node-positive 4 or more<br>or<br>Any Node-positive with<br>extensive vessel invasion or<br>HER2/neu pos.                                                                                                                                                     | Same features<br>plus<br>ER and PgR<br>absent |

According to this risk assessment, all breast cancer patients should receive adjuvant systemic treatment, except those, who meet all of the following favorable risk criteria:(19)

- no axillary lymph node metastases
- age  $\geq$  35 years
- endocrine-responsive disease
- tumor  $\leq$  2 cm
- histopathological grading G1
- no HER2-neu overexpression
- no vascular space invasion.

In all other patients, systemic treatment, either primarily systemic or adjuvant should be considered.

Treatment options should be considered and decided upon in the context of case management meetings, which should include:

- Weekly multidisciplinary case management meetings dealing with
  - diagnosis (surgeons, radiologists and pathologists)
  - further case management (surgeons, radiologists, pathologists, oncologists)
  - advanced breast cancer management
- San Antonio Database (Adjuvant Online) estimate support for decision making
- National guideline conformity assurance
- Daily counselling clinics to support decision making for the relevant patients

Within this protocol, patients will be treated according to the relevant national and international guidelines.

## 2.2 Anthracyclines in Adjuvant Therapy of Breast Cancer

Present data indicate that only women with node-negative breast cancers < 2 cm in

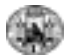

diameter and histopathological grade 1 (pT1, pN0, G1) have similar survival likelihood as age-matched women without breast cancer.(20) Therefore, women in this subgroup should only receive chemotherapy in the setting of a controlled clinical trial with carefully informed consent.

The cyclophosphamide, methotrexate, and fluorouracil (CMF) regimen was among the first multiagent regimens to show disease-free survival and overall survival benefits in patients with a more advanced stage of disease.(21;22) CMF still represents the adequate standard of care for patients with low risk disease;(23) for elderly patients and for those patients who have preexisting cardiac dysfunction or hypertension, the nonanthracycline regimen CMF may be preferable.(24) However, for patients with an increased risk for recurrence, several randomized studies and the 2000 Oxford overview confirms that anthracycline-based multiagent chemotherapy offers a significant survival benefit compared with CMF.(25-29) The meta-analysis of the Early Breast Cancer Trialists' Collaborative Group 1998 estimates a recurrence free survival benefit of 3.2% and an overall survival benefit of 2.7 % for anthracycline-based multi agent chemotherapy compared to CMF.(27)

### Figure 1 Randomized trials comparing CMF to anthracycline-based chemotherapies(27)

|          |                 |
|----------|-----------------|
| SECSG-02 | 6 FAC / 6 CMF   |
| ONCOFR   | 12 FAC / 12 CMF |
| SE BCG-A | 8 AC / 7 CMF    |
| Br-0283  | Polych. / 6 CMF |
| NSABP-15 | AC/AC-CMF/CMF   |
| GUN-03   | 3 CMFEV / 6 CMF |
| ICCG     | 8/6 FEC / 6 CMF |
| BCSG-3   | 6 CMFVA / 6 CMF |
| GABG-3   | 6 FEC / 6 CMF   |
| Belgium  | 8 EC / 6 CMF    |
| NCI-MA5  | 6 FEC / 6 CMF   |

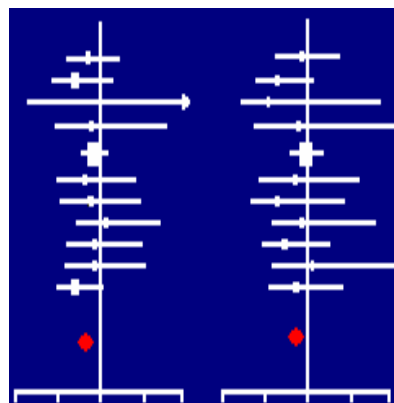

Anthracycline-based chemotherapy therefore can be assumed as the minimum standard in treating breast cancer patients who need cytostatic treatment.

Unfortunately, there is no national or international consensus on which regimen is preferable. Currently, there are two regimen internationally accepted as standard for anthracycline based chemotherapy: the Canadian FEC120 'Levine' regimen(26) and the French FEC100 'Bonneterre' regimen.

The results published by Levine et al. showed clear superiority of FEC chemotherapy over CMF in terms of both disease-free and overall survival. The 5-year recurrence-free survival rates were 63 % in the patient group treated with FEC and 53 % in the patient group treated with CMF (P= .009). The corresponding 5-year actuarial survival rate were 70% and 77%, respectively (P= .03). However, it should be noted, that the rate of hospitalization for febrile neutropenia was significantly higher in the FEC group (8.5 %, compared to 1,1% in the CMF group). None of the febrile



neutropenic episodes was fatal. There was no case of congestive heart failure noted in the FEC group. Five patients in the FEC group experienced acute leukemia. In general, patients who received FEC had more acute toxicity than CMF patients. 42 % of the FEC patients had grade 2 or more vomiting compared with only 18 % of CMF patients ( $P = .0001$ ). Similar differences were seen for nausea and stomatitis. For FEC patients, the median nadir of the white blood cell count was  $1.0 \cdot 10^9/l$ , compared to  $1.7 \cdot 10^9/l$  in the CMF group.(26)

The French Bonneterre FEC100 regimen (5-FU 500mg/m<sup>2</sup>, Epirubicin 100mg/m<sup>2</sup>, Cyclophosphamide 500mg/m<sup>2</sup>, all i.v. q3s) is even more popular and has proved to be significantly superior to the FEC50 regimen.(30;31) The 10-year DFS was 45.3% in FEC 50 and 50.7% in FEC 100, with a relative risk (RR) reduction of 24% (Wilcoxon,  $p=.03$ ). The 10-year OS was 50% and 54.8%, respectively, with a RR reduction of 29% (Wilcoxon,  $p=.03$ ). In the multivariate analysis including patients and tumor characteristics, FEC 100 remained significantly superior to FEC 50 for both DFS ( $p=.08$ ) and OS ( $p=.04$ ). In the FEC 50 arm, long-term side effects (not related to treatment) were: myocardial infarction, and acute lymphoblastic leukemia; in FEC 100: 3 congestive heart failures and 1 acute myeloblastic leukemia FAB 4 (probably related to chemotherapy). Overall, the 10-year DFS? EFS was 44.5% and 49.3%, respectively (Wilcoxon,  $p=.06$ ). This regimen lacks a direct comparison to the classical CMF-regimen, but also meets the standard criteria of a multi-agent anthracycline regimen, containing at least 30mg/m<sup>2</sup> epirubicin per week. It appears most unlikely that the Bonneterre FEC100 regimen is inferior to the FEC120 regimen, despite the fact that there is no data on a direct comparison available. Therefore, the Bonneterre FEC100 regimen is widely accepted as alternative anthracycline standard.

Further dose escalations of anthracyclines and of cyclophosphamide beyond the already intense dose have so far not proven superior in large randomized controlled trials.(32-34)

Epirubicin has been chosen as anthracycline component of the standard and experimental therapy regimen for the following reasons:

- Epirubicin (4'-epidoxorubicin) is an antineoplastic agent derived from doxorubicin. The compounds differ in the configuration of the hydroxyl group at the 4' position. Epirubicin, like doxorubicin, exerts its antitumor effects by interference with the synthesis and function of DNA and is most active during the S phase of the cell cycle. The overall activity of epirubicin appears to be comparable with that of doxorubicin,(35) while toxicity is more frequent and more pronounced in patients receiving doxorubicin instead of epirubicin.(36)
- Epirubicin has been successfully used in the Bonneterre regime,(26)
- Epirubicin is used more widely in countries of the European Union, particularly in Germany. Epirubicin based regimens are the corner stone for recommendations of the Gravenbruch and St. Gallen consensus recommendations.(23)
- To evaluate the potential benefit of using gemcitabine in addition to docetaxel, it seemed important and appropriate to use the same anthracycline in the experimental treatment arm as in the standard arm.

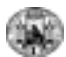

## 2.3 The Role of Taxanes in the Therapy of Breast Cancer

Since about 1995, there is increasing evidence that the taxanes are among the most promising new chemotherapy agents for the treatment of breast cancer.(37) While the majority of data on the efficacy of these agents have been generated with the agent paclitaxel, there now is also sufficient data available on the efficacy of docetaxel containing regimen as new possible standard of care, in order to justify the initiation of this phase III trial.

### 2.3.1 Docetaxel in the Treatment of Metastatic Breast Cancer

In four phase II studies involving 134 patients with metastatic breast cancer, classified as anthracycline-resistant, docetaxel produced response rates ranging from 29 % to 54 %, with an overall response rate of 41 % (35 – 50 %, 95 % CI). The median time to progression was 4.3 months, the median survival time was 10.6 months.(38)

Subsequently, several phase III studies have been conducted, comparing therapeutic efficacy and toxicity of docetaxel with that of anthracyclines. In a recently published study of the 303 Study Group, patients were randomized to receive an intravenous infusion of docetaxel 100 mg/m<sup>2</sup> or doxorubicin 75 mg/m<sup>2</sup> every 3 weeks for a maximum of seven treatment cycles.(39) 326 patients were followed for a median of 23 months. Overall, docetaxel produced a significantly higher rate of objective response than did doxorubicin (47.8% v 33.3%; P=.008). Docetaxel was also significantly more active than doxorubicin in patients with negative prognostic factors, such as visceral metastases (objective response, 46% v 29%) and resistance to prior chemotherapy (47% v 25%). Median time to progression was 26 weeks in the docetaxel group, compared to 21 weeks in the doxorubicin group (difference not significant). However, median overall survival was similar in the two groups (docetaxel, 15 months; doxorubicin, 14 months). Febrile neutropenia occurred more frequently in the doxorubicin group (12.3 %, compared to 5.7 % in the docetaxel group).

At the 1999 ASCO meeting, Nabholz et al. presented a pivotal randomized phase III study of doxorubicin plus docetaxel (50/75) versus doxorubicin plus cyclophosphamide (60/600) as first-line chemotherapy for 429 patients with metastatic breast cancer, doxorubicin/docetaxel emerged as the more effective regimen. The response rate in patients with doxorubicin plus docetaxel was 60 % compared to 47 % in patients with doxorubicin plus cyclophosphamide.(40;41) In another phase III study by this author, docetaxel was compared with mitomycin plus vinblastine (MV) in patients with metastatic breast cancer (MBC) progressing despite previous anthracycline-containing chemotherapy. 392 patients were randomized to receive either docetaxel 100 mg/m<sup>2</sup> intravenously (i.v.) every 3 weeks or mitomycin 12 mg/m<sup>2</sup> i.v. every 6 weeks plus vinblastine 6 mg/m<sup>2</sup> i.v. every 3 weeks. Median time to progression and overall survival were significantly longer with docetaxel than MV (19 vs. 1 weeks, P=.001, and 1.4 vs. 8.7 months, P=.0097, respectively).(42)

At the ASCO 2001 meeting, Bonnetterre et al. presented a randomized phase II study to evaluate the activity of ET (75/75 mg/m<sup>2</sup>) combination versus a standard





anthracycline based regimen (FEC 75) in first line metastatic breast cancer patients. In this study, out of 105 evaluable patients, the response rate was 65% in the ET-arm and 37% in the FEC-arm. The authors concluded that the ET activity appeared considerably higher than the FEC activity.(43) In another phase III study at this meeting, Docetaxel, Doxorubicin and Cyclophosphamide (75/50/500 mg/m<sup>2</sup>) was compared to FAC (500/50/500 mg/m<sup>2</sup>) d1q3wk (maximum 8 cycles) as first line chemotherapy for metastatic breast cancer. As depicted in the following table, this study confirmed superiority of docetaxel-anthracycline based regimen compared to anthracycline containing multi-agent chemotherapy in terms of response rates.(44)

**Table 2 Randomized Phase III Trial Comparing DAC to FAC in Metastatic Breast Cancer(44)**

| Efficacy Intent to treat   | TAC     | FAC     |         |
|----------------------------|---------|---------|---------|
| Entered/Treated pts        | 242/238 | 242/237 |         |
| Overall Response Rate      | 54%     | 43%     | p=0.023 |
| CR                         | 8%      | 5%      |         |
| PD                         | 10%     | 13%     |         |
| Response Rate by subgroups |         |         |         |
| Visceral/Lung              | 51%/54% | 45%/42% |         |
| ≥3 organs                  | 56%     | 44%     |         |
| Adjuvant CT                | 57%     | 38%     |         |

### **2.3.2 Taxanes in the Adjuvant Treatment of Primary Breast Cancer**

#### **2.3.2.1 Paclitaxel in the Adjuvant Treatment of Primary Breast Cancer**

Based on the 20- and 30-months results of the Cancer and Leukemia Group B (CALBG) 9344 trial, the addition of paclitaxel to the adjuvant treatment of node-positive breast cancer has been approved in the United States, but not in Europe.(34) In this trial, patients were prospectively randomized to receive three different doses of adriamycin (60 mg/m<sup>2</sup>, 75 mg/m<sup>2</sup>, 90 mg/m<sup>2</sup> as part of four cycles AC chemotherapy), followed by a randomization between nihil (AC) or subsequent therapy with 175 mg/m<sup>2</sup> paclitaxel (AC→T).





**Figure 2 CALGB 9344 prospectively randomized trial to compare 4 cycles of AC with 4 cycles of AC followed by paclitaxel(34)**

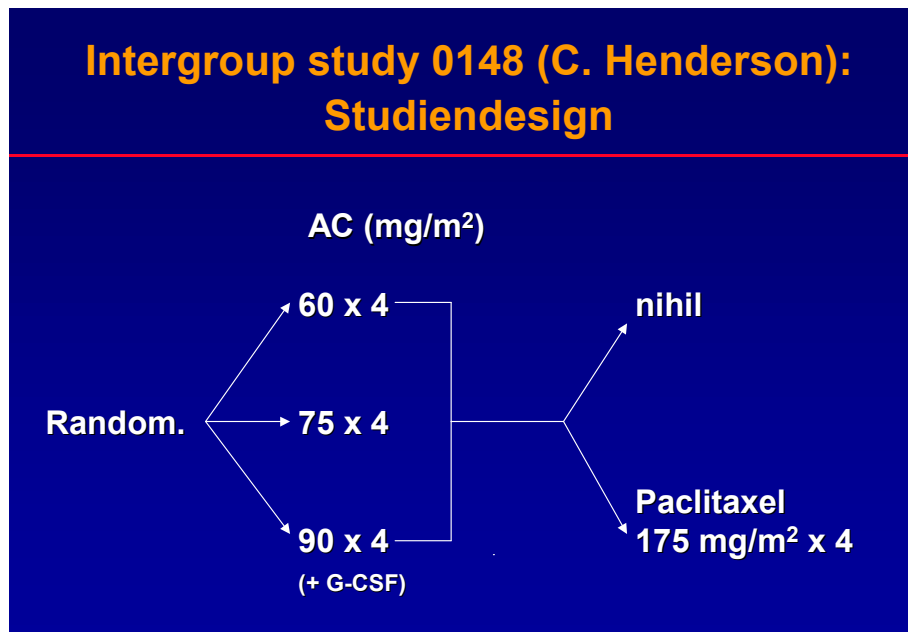

At the time of first presentation of these data, the recurrence free survival rate at 18 months follow-up was 86 % in the AC treatment arm and 90 % in the AC→T treatment arm (P=.0077). The overall survival rates were 95 % and 97 %, respectively (P=.039). No differences were seen between the patient groups with different doses of anthracycline. However, currently up-dated study results, presented by Henderson et al. at the 2000 San Antonio Breast Cancer Symposium and at the National Institute of Health CDC Meeting, did not maintain the same level of significance.

**Table 3 Development of study results of the CALGB 9344 by extended follow-up**

|                                               | <i>ASCO 98</i> | <i>SNDA 99</i> | <i>NIH CDC 2000</i> |
|-----------------------------------------------|----------------|----------------|---------------------|
| <b>Median Follow-up (months)</b>              | 21             | 30             | 52                  |
| <b>Number of recurrences</b>                  | 423            | 624            | 901                 |
| <b>Number of deaths</b>                       | 200            | 342            | 589                 |
| <b>Reduction of hazard ratio (recurrence)</b> | 22 %           | 22 %           | 13 %                |
| <b>Reduction of hazard ratio (death)</b>      | 26 %           | 26 %           | 14 %                |

Further criticisms of the CALGB trial include that it is not clear to what extent the duration of treatment, which was longer in the AC→T treatment arm, which may have influenced the study results. In 2003, the final analysis of the study was published, mostly confirming the initially indicated survival benefit.(45) The hazard reductions from adding paclitaxel to AC were 17% for recurrence (adjusted Wald chi(2) P



=.0023; unadjusted Wilcoxon P =.0011) and 18% for death (adjusted P =.0064; unadjusted P =.0098). At 5 years, the disease-free survival (+/- SE) was 65% (+/- 1) and 70% (+/- 1), and overall survival was 77% (+/- 1) and 80% (+/- 1) after AC alone or AC plus paclitaxel, respectively. The effects of adding paclitaxel were not significantly different in subsets defined by the protocol, but in an unplanned subset analysis, the hazard ratio of AC plus paclitaxel versus AC alone was 0.72 (95% confidence interval, 0.59 to 0.86) for those with estrogen receptor-negative tumors and only 0.91 (95% confidence interval, 0.78 to 1.07) for patients with estrogen receptor-positive tumors, almost all of whom received adjuvant tamoxifen. The additional toxicity from adding four cycles of paclitaxel was generally modest. The authors concluded that the addition of four cycles of paclitaxel after the completion of a standard course of AC improves the disease-free and overall survival of patients with early breast cancer

Preliminary results of the other major trial, including paclitaxel in the adjuvant treatment of breast cancer, the NSABP B-28 trial were presented at the ASCO 2003 meeting.(46) In this study with similar design, paclitaxel 225 mg/m<sup>2</sup> q4w following four cycles of AC were applied instead of 175 mg/m<sup>2</sup>. All patients  $\square$  50 years and those < 50 with ER-or PgR-positive tumors also received tamoxifen 20 mg p.o. daily for 5 years, starting with AC. Most frequently reported grade 3+ toxicity on AC (% of pts): day 1 granulocytopenia: 8%, febrile neutropenia: 7%, nausea: 6%, vomiting: 5%, infection: 3%, thromboembolic events: 2% and stomatitis: 2%. Most frequently reported grade 3+ toxicities on T (% of pts): neurotoxicity: 19%, arthralgia/myalgia: 11%, day 1 granulocytopenia: 4%, febrile neutropenia: 2%, infection: 2%, thromboembolic events: 2% and hypersensitivity reactions: 1%. While after a median follow-up of 64.6 months, disease free survival was significantly improved in patients receiving paclitaxel (p=0.008), overall survival did not differ statistically between the two treatment arms (p=0.46).

**Figure 3 Disease Free Survival of NSABP B-28 Trial(46)**

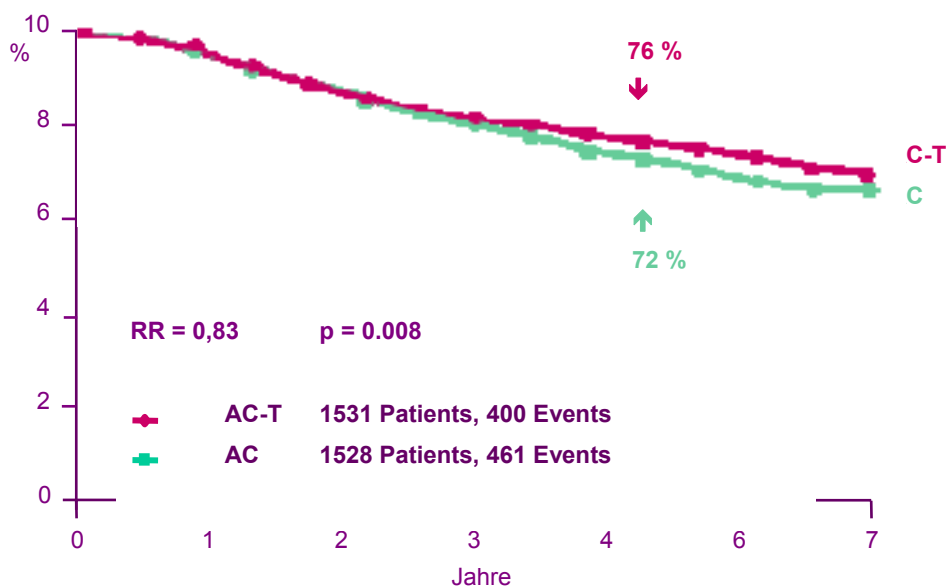

**Figure 4 Overall Survival of NSABP B-28 Trial(46)**

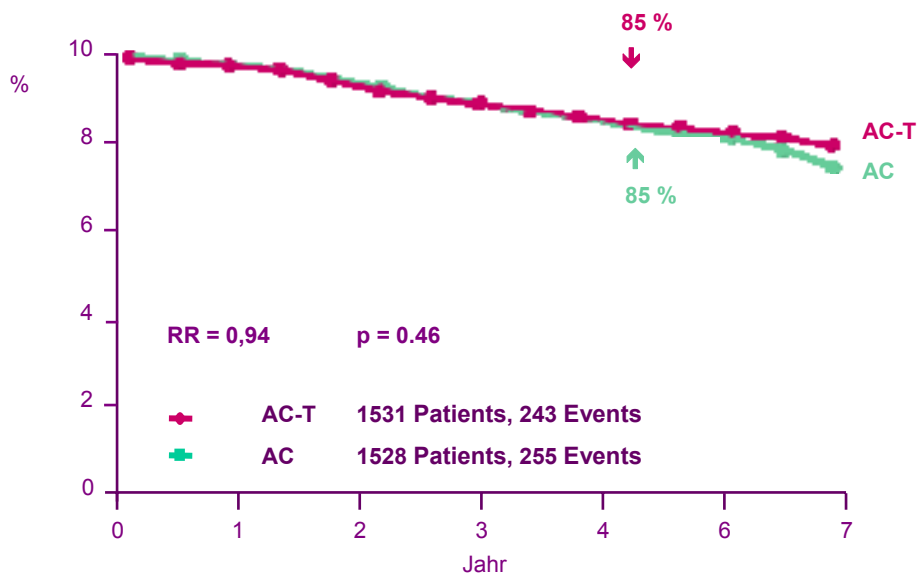

**2.3.2.2 Docetaxel in the Adjuvant Treatment of Primary Breast Cancer**

To date, there are results of two major randomized Phase III trials including docetaxel in the adjuvant treatment of breast cancer available. The first, more mature trial, the BCIRG 001 trial compared TAC (75/50/500 mg/m<sup>2</sup> q3wk x 6) with FAC (500/50/500 mg/m<sup>2</sup> q3wk x 6) in node positive breast cancer.

**Figure 5 BCIRG 001 Study Design**

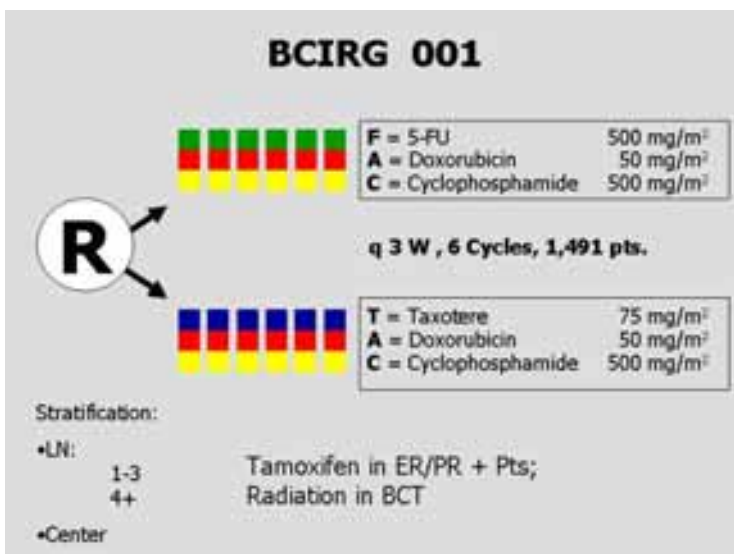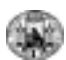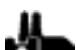

At the ASCO Annual Meeting 2002, a planned interim analysis at 33 mos median follow-up (range 0-49 mos) was presented.(47) Cox analysis for disease free survival showed a relative risk ratio for TAC/FAC of 0.64 (0.50,0.81; p=0.0002) and for overall survival 0.71 (0.50,1.00; p=0.049). For DFS, there were 119 events on TAC and 170 on FAC; 82% of patients on TAC and 74% on FAC were alive and disease-free. However, in patients with more than 3 metastatic axillary lymph nodes, neither disease free, nor overall survival differed significantly between the two study arms. Febrile neutropenia (24% vs 2%) and grade 3/4 infection (2.8% vs 1.3%) were higher with TAC. No septic deaths occurred. Other grade 3/4 toxicities in > 5% of patients included nausea (9%), vomiting (7%), asthenia (5%) with FAC and asthenia (11%), stomatitis (7%) with TAC. Congestive heart failure incidence was 1.2% on TAC and 0.1% on FAC.

**Table 4 2nd Interim Analysis of the BCIRG 001 Study(48)**

| <b>Intent-to-Treat Efficacy Analyses Prospectively Powered (n=1,491)</b> |                                          |                |
|--------------------------------------------------------------------------|------------------------------------------|----------------|
| <b>DFS</b>                                                               | <b>Hazard Ratio<br/>TAC/FAC (95% CI)</b> | <b>P-value</b> |
| Adjusted for N status (Primary endpoint)                                 | 0.72 (0.59-0.88)                         | 0.0010         |
| 1-3 nodes (n=923)                                                        | 0.61 (0.46-0.82)*                        | 0.0009         |
| 4+ nodes (n=568)                                                         | 0.82 (0.63-1.08)*                        | 0.1629         |
| Hormone Receptor Positive†                                               | 0.73 (0.57-0.94)                         | 0.0132         |
| Hormone Receptor Negative†                                               | 0.66 (0.47-0.93)                         | 0.0163         |
| <b>Overall Survival</b>                                                  |                                          |                |
| Adjusted for N status                                                    | 0.70 (0.53-0.91)                         | 0.0080         |

\*Ratio of Hazard Ratios: 1.34 (0.90-2.00), p= 0.1476, †: Centrally reviewed

At the SABCS 2003, the second interim analysis was presented. At a median follow-up of 55 months and 399 DFS events, a statistical boundary of 0.001 for DFS adjusted for nodal (N) status was defined for this analysis.(48) For DFS, there were 172 events on TAC and 227 on FAC: 80% and 75% of pts on TAC were alive and disease-free at 4 and 5 years respectively, vs.71% and 68% on FAC. For OS, there were 91 events on TAC and 130 on FAC: 89% and 87% of pts on TAC were alive at 4 and 5 years respectively, vs. 85% and 81% on FAC. HER2neu amplification was centrally reviewed. TAC/FAC DFS hazard ratio was 0.61 (0.42-0.90; p=0.0118) in HER2+ pts, and 0.76 (0.58-0.99; p=0.0380) in HER2- pts. There were no changes in the toxicity profile since the first interim analysis.



**Figure 6 Disease Free Survival of BCIRG 001 at 2<sup>nd</sup> Interim Analysis(48)**

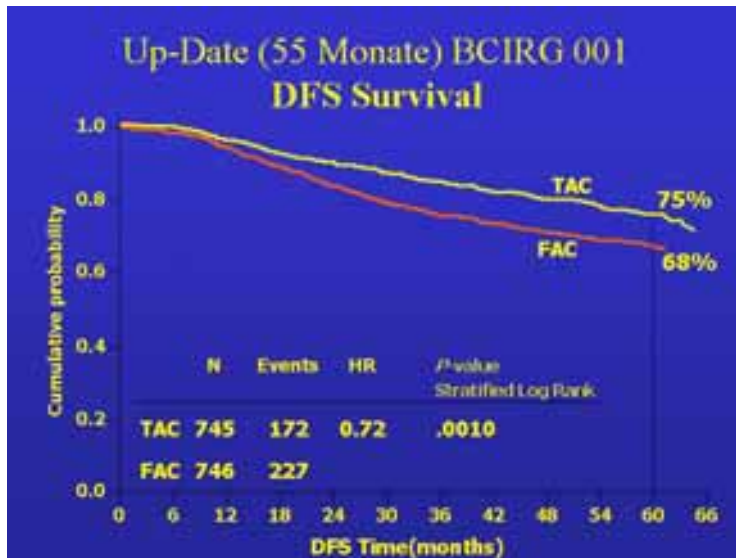

**Figure 7 Overall Survival of BCIRG 001 at 2<sup>nd</sup> Interim Analysis(48)**

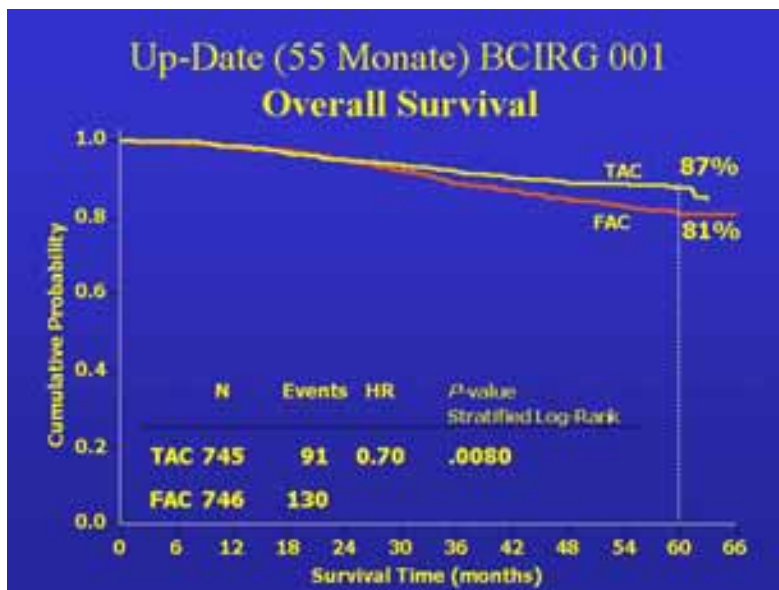

The results of the first interim analysis of the other randomized Phase III trial, the French PACS 01 study were presented at the SABCS 2004.(49) Pts had localized, resectable, non pre-treated, unilateral breast cancer. Main inclusion criteria were: age < 65 years, at least one positive node, no metastasis, normal cardiac, hepatic, haematological and renal functions. Arm A: 6 cycles of FEC100 (5FU/epirubicin/cyclophosphamide 500/100/500 mg/m<sup>2</sup> day 1, every 3 weeks); Arm B: docetaxel 100 mg/m<sup>2</sup> (day 1, every 3 weeks) replaced FEC100 for the last 3 cycles. First chemotherapy was to be started no more than 42 days after surgery. G-CSF was given in cases of febrile neutropenia or delay of neutrophil recovery by day

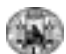

21. Radiotherapy was mandatory after conservative surgery and tamoxifen was given for 5 years if tumors were positive for at least one hormone receptor (HR). To ensure a minimal power of 90%, the analysis was to be carried out at a median follow-up of 60 months and, if at that time, 469 events or more have been observed.

### Figure 8 PACS 001 Study Design

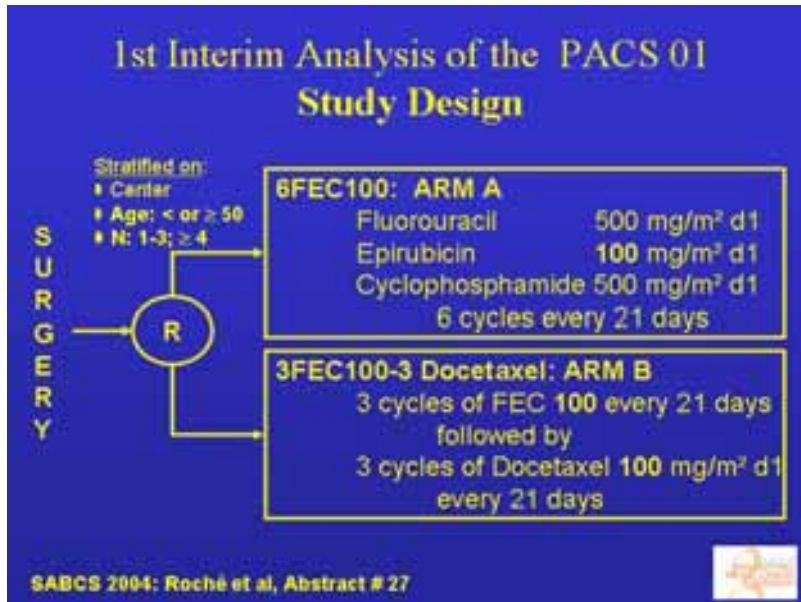

Treatment was completed for 95% and 93.4% of pts in arms A and B, respectively. Toxicity was reported at 2003 SABCS (abstract 144). More febrile neutropenia and nail disorders were observed in Arm B and a more decreased and subnormal LVEF at the end of chemotherapy Arm A. Five cases of leukaemia (3 Arm A; 2 Arm B) were observed. No toxic deaths have been reported. As of 30 April 2004, 465 pts have experienced at least one event: 93 locoregional relapses, 324 metastasis, 38 contralateral breast cancers, and 10 deaths as first event. A total number of 37 second cancers and 210 deaths were registered. The 5 year efficacy results revealed a significant benefit for patients receiving 3 cycles of FEC100 followed by 3 cycles of docetaxel in terms of disease free survival (p=0.014) and overall survival (p=0.017).





**Figure 9 Disease Free Survival of PACS 01 at 5 Years of Follow-up(49)**

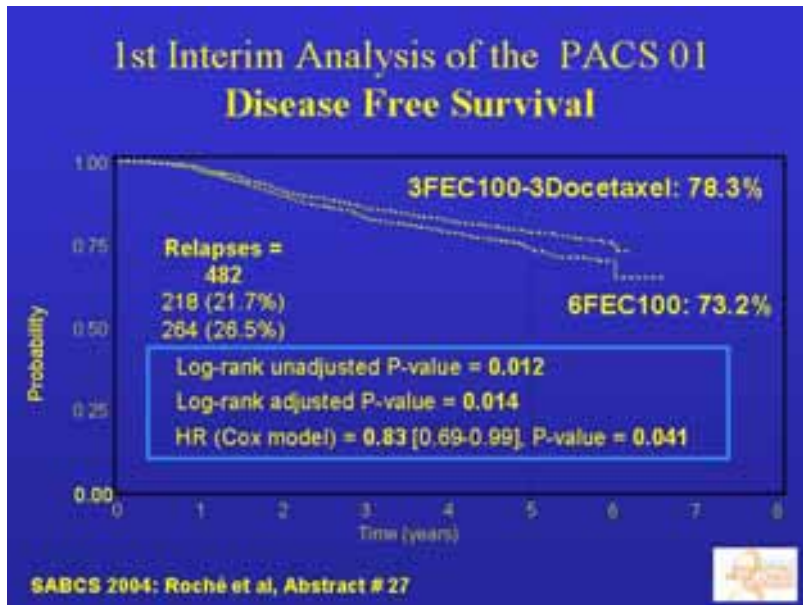

**Figure 10 Overall Survival of PACS 01 at 5 Years of Follow-up(49)**

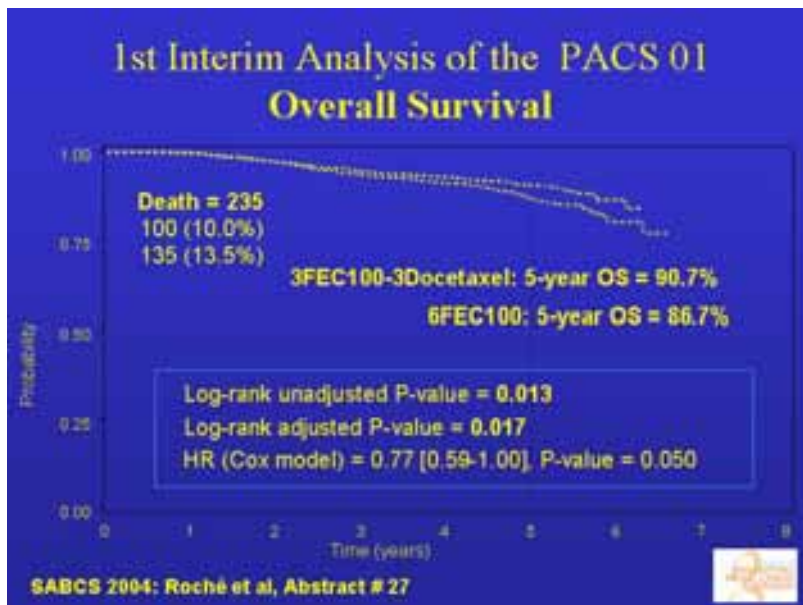

The results of this study provide sufficient evidence to choose the superior treatment arm of the PACS01 study as control arm of this protocol.

Right now, there are 8 treatment protocols evaluating the role of docetaxel in the adjuvant treatment of breast cancer with currently 14,104 patients to be enrolled.(50) However, no efficacy results have been demonstrated so far. Optimal use of anthracyclines and taxanes in early breast cancer remains a promising area of research,(51) as will be evaluated by this study.



## **2.4 Gemcitabine in the Treatment of Breast Cancer**

### **2.4.1 Gemcitabine as single agent and combination drug**

Gemcitabine is an antimetabolite drug effective in breast cancer as a single agent and in combination with other chemotherapeutic agents. Its unique mechanisms of action, which involve masked DNA chain termination and several self-potentiating effects on DNA and RNA synthesis enzymes, result in broad and potent activity across many cancer types.(52) In a total of nine studies, gemcitabine monotherapy has reached response rates of up to 37% in the first-line setting, 26% in the second-line setting, and 18% or better in the third-line setting. Gemcitabine is an excellent choice for combination therapy by its unique mechanism of action and favorable toxicity profile, thus limiting the risk of pretreatment-related drug resistance and overlapping toxicity, and by its potential for synergistic interaction with some combination partners as indicated in preclinical studies.(53)

In breast cancer, as a single agent, gemcitabine yields response rates ranging from 14%-37% as first-line therapy for advanced breast cancer and 23%-42% as salvage therapy. However, these were small studies with large confidence intervals around all the indices of benefit including response rate, response duration, and time to disease progression. Gemcitabine is associated with higher response rates when used in combination with other agents.(52) The combination of gemcitabine and anthracyclines-containing double- and triple-drug combinations used to treat patients with early-stage and advanced breast cancer were promising, with good tolerability and overall response rates ranging from 33%-89% in advanced disease.(54) Numerous phase II clinical studies have combined gemcitabine with other active agents such as taxanes, vinorelbine, vindesine, cisplatin, 5-fluorouracil, as well as anthracyclines across various regimens and conditions of pretreatment. Most of these two-drug combinations have consistently demonstrated higher efficacy than either single agent, particularly in pretreated patients. Even higher efficacy has been obtained with triple-drug regimens including gemcitabine, anthracyclines (epirubicin or doxorubicin), and paclitaxel; these regimens have yielded overall response rates of 58-92% as first-line treatment.(53)

### **2.4.2 Gemcitabine in combination with taxanes in breast cancer**

The taxanes are recognized as some of the most active single agents in breast cancer and demonstrate remarkable activity with manageable toxicity in combination with gemcitabine. Gemcitabine, a novel S-phase specific cytidine nucleoside analogue of deoxycytidine, has broad antitumor activity with significant monotherapy activity in breast cancer, with response rates ranging from 22% to 42%, depending on the pretreatment characteristics of the patients. In general, gemcitabine's favorable single-agent activity and novel mechanism of action, in addition to its largely nonoverlapping toxicities, have facilitated its further development in combination with a variety of chemotherapy agents, including the taxanes. Several phase I and II trials have reported impressive activity for the gemcitabine/taxane doublet with the suggestion of synergism between these 2 classes of agents. Given the remarkable and durable activity reported for this doublet, subsequent phase II

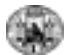



trials have focused on optimizing doses and schedules.(55)

Initial studies evaluated a variety of gemcitabine/taxane administration schedules (Table 5).(56-62) Early trials focused on fractionated gemcitabine schedules (days 1, 8, and 15) with taxane administration as a single dose. Murad et al reported the results of 29 patients with mostly anthracycline refractory metastatic disease who were treated with 175 mg/m<sup>2</sup> paclitaxel on day 1 followed by gemcitabine on days 1, 8, and 15 at a 1000 mg/m<sup>2</sup> every 28 days.(63) Significant thrombocytopenia (18.5%) experienced by the first 5 patients resulted in elimination of the day 15 gemcitabine dose with the remaining patients treated on a 21-day schedule. Well tolerated, an overall response rate of 55% was noted, including 5 complete responses (CRs). Growth factor use in one third of the patients resulted in only a 9% rate of grade 3/4 neutropenia. The paclitaxel/gemcitabine combination was highly active with more than half of the patients achieving objective responses translating into a median survival of 12 months. However, the highest response rate and median survival was achieved for a gemcitabine/taxane doublet, utilizing the gemcitabine days 1, 8, and 15 schedule with docetaxel.(56) In this multicenter trial, 39 patients (33 had received prior anthracyclines) were treated with docetaxel 100 mg/m<sup>2</sup> on day 1 and with gemcitabine 800 mg/m<sup>2</sup> on day 1 and 8. Responses were dramatic with an overall response rate of approximately 79% with 2 CRs, 29 partial responses (PR), and 3 with stable disease (SD). Grade 3/4 neutropenia was universal, occurring in all enrolled patients, and with the stipulation that no growth factor use was permitted. Febrile neutropenia, however, was infrequent and evident in only 3 patients. Thrombocytopenia was also infrequent with only 1 patient with grade 3 thrombocytopenia and no grade 4 occurrences. The only remarkable grade 3/4 nonhematologic toxicity, occurring in 13 patients, was asthenia.

Vici et al evaluated higher doses of gemcitabine at 1500 mg/m<sup>2</sup> with paclitaxel at 150 mg/m<sup>2</sup> on days 1 and 15 at 28-day intervals.(57) All 20 patients evaluable for efficacy had received prior anthracyclines. Overall response rate was 45% with 10% CRs. As a result of mandated growth factor support on days 7-9 and 20-22, only 11% of the patients demonstrated grade 3/4 neutropenia. Median time to progression (TTP) was 8 months. At least 5 additional phase II trials have reported significant activity evident for the gemcitabine/taxane doublet, each exploring a gemcitabine schedule of days 1 and 8 in patients with previously treated MBC. Both Fountzilas et al and Schneeweiss et al used lower doses of gemcitabine at 1000 mg/m<sup>2</sup> on days 1 and 8, with docetaxel 75 mg/m<sup>2</sup> on day 1 only.(58;59) In the first trial, despite all patients being notably anthracycline resistant, median survival surpassed 1 year. Only 19 of 29 enrolled patients were evaluable for efficacy at the time Schneeweiss reported results with a noted response rate of 47% with 5 CRs. In both trials, grade 3/4 neutropenia occurred in nearly 50% of the patients with nonhematologic toxicity consisting primarily of asthenia and fatigue.(62) Mucositis was the most frequent nonhematologic toxicity with this schedule.

A suggestion of synergism between gemcitabine and taxanes has been evident in at least 2 studies. A day-8 docetaxel schedule with gemcitabine 900 mg/m<sup>2</sup> given on days 1 and 8 was administered to 52 patients with anthracycline-pretreated breast cancer, half of whom had also previously been treated with a prior taxane-based regimen.(60) Growth factor used on days 9-16 resulted in only 29% grade 3/4 neutropenia. The overall response rate was 54%, which is surprising particularly in



the light of the fact that just over 50% of enrolled patients had been exposed to prior taxane therapy. Eleven of 25 patients (44%) previously treated with taxane-based regimen demonstrated 1 CR and 10 PRs to the gemcitabine/taxane doublet. Furthermore, 4 of these 11 responders had progressed while being actively treated with the taxane and in 3 of these 4 responders, docetaxel was the front-line taxane administered. Grade 3/4 thrombocytopenia was evident in 21%, reflecting the extensively pretreated patient characteristics. Another study of Alexopoulos et al possessed an entirely unique design. Thirty-six patients with anthracycline-resistant MBC demonstrated either stable (n = 22) or progressive (n = 14) disease after 4-6 cycles of single-agent docetaxel.(61) They went on to continue treatment with docetaxel 100 mg/m<sup>2</sup> every 21 days to which gemcitabine was added at 900 mg/m<sup>2</sup> on days 1 and 8. There were 3 CRs and 23 PRs among these 36 patients, for an overall response rate of 72%. Of the 14 patients who demonstrated progression to single-agent docetaxel, 9 responded to the combination, as did 17 of the 22 patients with SD. The gemcitabine/docetaxel doublet provided additional benefit over single-agent docetaxel, although no toxicity data were available. The remarkable responses evident in the gemcitabine/docetaxel doublet, despite previous taxane exposure, imply that noteworthy synergism exists between these 2 agents. Collectively, these studies demonstrate that the gemcitabine/taxane doublet may serve as a potent regimen, particularly following anthracycline and/or taxane pretreatment. Irrespective of the schedule used, response rates for the gemcitabine/taxane doublet have ranged from 36% to 79%, depending on the pretreatment characteristics of the patients. As a final point, although preclinical data are inconclusive with regards to the synergism evident between taxanes and gemcitabine, they clearly support the use of this combination, serving as an impetus to further evaluate this doublet in future phase III trials.(55)

**Table 5 Phase II Studies of Gemcitabine and Taxanes in Patients with Pretreated Metastatic Breast Cancer**

| Study                           | Number of Patients | Gemcitabine Dosage                                             | Taxane Regimen                                                  | ORR |
|---------------------------------|--------------------|----------------------------------------------------------------|-----------------------------------------------------------------|-----|
| Murad et al <sup>22</sup>       | 29                 | 1000 mg/m <sup>2</sup> days 1 and 8 every 21 days*             | Paclitaxel 175 mg/m <sup>2</sup> day 1 every 21 days            | 55% |
| Laufman et al <sup>23</sup>     | 39                 | 800 mg/m <sup>2</sup> days 1, 8, and 15 every 28 days          | Docetaxel 100 mg/m <sup>2</sup> day 1 every 28 days             | 79% |
| Vici et al <sup>24</sup>        | 27                 | 1500 mg/m <sup>2</sup> days 1 and 15 every 28 days             | Paclitaxel 150 mg/m <sup>2</sup> days 1 and 15 every 28 days    | 45% |
| Fountzilas et al <sup>25</sup>  | 40                 | 1000 mg/m <sup>2</sup> days 1 and 8 every 21 days for 6 cycles | Docetaxel 75 mg/m <sup>2</sup> day 1 every 21 days for 6 cycles | 36% |
| Lenz et al <sup>26</sup>        | 29                 | 1000 mg/m <sup>2</sup> days 1 and 8 every 21 days              | Docetaxel 75 mg/m <sup>2</sup> day 1 every 21 days              | 47% |
| Mavroudis et al <sup>27</sup>   | 52                 | 900 mg/m <sup>2</sup> days 1 and 8 every 21 days               | Docetaxel 100 mg/m <sup>2</sup> day 8 every 21 days             | 54% |
| Alexopoulos et al <sup>28</sup> | 36                 | 900 mg/m <sup>2</sup> days 1 and 8                             | Docetaxel 100 mg/m <sup>2</sup> day 8 every 21 days             | 72% |
| Brandi et al <sup>29</sup>      | 37                 | 1000 mg/m <sup>2</sup> days 1 and 8 every 21 days              | Docetaxel 80 mg/m <sup>2</sup> day 8 every 21 days              | 60% |

\*Reduced from 1000 mg/m<sup>2</sup> on days 1, 8, and 15 every 28 days after the first 5 patients experienced significant thrombocytopenia (18.5%).

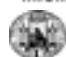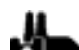

As first-line treatment in patients with MBC, the gemcitabine/taxane doublet has generally reported high response rates (Table 6).(64-66) With paclitaxel at 175 mg/m<sup>2</sup> and gemcitabine 1200 mg/m<sup>2</sup> on a days 1 and 8, Genot et al reported outcomes for 40 patients.(65) Two CRs and 13 PRs for an overall response rate of 42% was noted with 76 events of grade 3/4 granulocytopenia. Median TTP was nearly 8 months. Employing the identical regimen, Delfino et al reported a 14% CR rate with an overall response rate of 55%.(64) Only 14% of patients demonstrated grade 3/4 leukopenia. Regardless of the pretreatment characteristics of patients, the paclitaxel/gemcitabine combination resulted in manageable myelosuppression. A first-line treatment of docetaxel 35 mg/m<sup>2</sup> given on days 1, 8, and 15 in combination with gemcitabine is underway.(66) Preliminary results for 8 of a goal of 50 patients demonstrate an impressively high response rate of 75%, a figure reminiscent of the 79% response rate noted for standard day 1 full dose docetaxel in the trial by Laufman and colleagues. Although less hematologic toxicity is expected than was noted in that trial, no toxicity data were available at the time of this preliminary report.

**Table 6 Phase II Studies of Gemcitabine and Taxanes in Patients Metastatic Breast Cancer as First Line Treatment**

| Study                       | Number of Patients | Gemcitabine Dosage                                    | Taxane Regimen                                                 | ORR |
|-----------------------------|--------------------|-------------------------------------------------------|----------------------------------------------------------------|-----|
| Genot et al <sup>31</sup>   | 40                 | 1200 mg/m <sup>2</sup> days 1 and 8 every 21 days     | Paclitaxel 175 mg/m <sup>2</sup> day 1 every 21 days           | 42% |
| Delfino et al <sup>32</sup> | 42                 | 1200 mg/m <sup>2</sup> days 1 and 8 every 21 days     | Paclitaxel 175 mg/m <sup>2</sup> day 1 every 21 days           | 55% |
| Palmeri et al <sup>33</sup> | 16                 | 800 mg/m <sup>2</sup> days 1, 8, and 15 every 28 days | Docetaxel 35 mg/m <sup>2</sup> days 1, 8, and 15 every 28 days | 75% |

An alternative option, which is followed frequently in the palliative setting, is the gemcitabine-taxane combination in a biweekly schedule (Table 7),(67-71) which is, however, not suitable for this study. Since in the SUCCESS-Study, the question, whether the addition of gemcitabine to docetaxel leads to an optimized taxane efficacy in the adjuvant settings, needs to be addressed in a clear concept, differences in the scheduling between the control and the study arm will not be allowed.

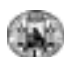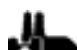

**Table 7 Phase II Studies of Gemcitabine and Taxanes in Patients Metastatic Breast Cancer as Biweekly Treatment**

| Study                              | Number of Patients | Gemcitabine Dosage                                 | Taxane Regimen                                               | ORR                                      |
|------------------------------------|--------------------|----------------------------------------------------|--------------------------------------------------------------|------------------------------------------|
| Colomer et al <sup>34</sup>        | 43                 | 2500 mg/m <sup>2</sup> day 1 every 14 days         | Paclitaxel 150 mg/m <sup>2</sup> day 1 every 14 days         | Overall, 69%<br>HER2-, 85%<br>HER2+, 40% |
| Llombart et al <sup>35</sup>       | 43                 | 2500 mg/m <sup>2</sup> day 1 every 14 days         | Paclitaxel 150 mg/m <sup>2</sup> day 1 every 14 days         | 68%                                      |
| Sanchez-Rovira et al <sup>36</sup> | 44                 | 2500 mg/m <sup>2</sup> days 1 and 15 every 28 days | Paclitaxel 135 mg/m <sup>2</sup> days 1 and 15 every 28 days | 45%                                      |
| Kornek et al <sup>37</sup>         | 52                 | 1500 mg/m <sup>2</sup> days 1 and 15 every 28 days | Docetaxel 50 mg/m <sup>2</sup> days 1 and 15 every 28 days   | 61%                                      |
| Pelegri et al <sup>38</sup>        | 49                 | 2500 mg/m <sup>2</sup> day 1 every 14 days         | Docetaxel 65 mg/m <sup>2</sup> day 1 every 14 days           | 66%                                      |

Because of numerous phase II trials demonstrating efficacy of gemcitabine/taxane combinations as either a first- or second-line treatment of MBC, a phase III randomized trial was undertaken to evaluate the specific question of added benefit of gemcitabine to paclitaxel, an agent approved for monotherapy as first-line treatment of MBC.

An interim analysis of this large, global phase III study, presented at the ASCO 2003 Annual Meeting, demonstrated that first-line treatment with gemcitabine/paclitaxel is more efficacious than paclitaxel alone (Figure 11).<sup>(72)</sup> This study compared Gemcitabine and Paclitaxel with T in 529 pts with MBC previously treated with an anthracycline, but no prior chemotherapy for MBC. Objectives were overall survival (OS), progression-free survival (PFS), overall response rate (ORR), QoL, palliation of pain, toxicity, and time to progressive disease (TTP; primary interim analysis objective). Patients with histologically confirmed, measurable metastatic breast cancer with prior adjuvant/neoadjuvant anthracyclines (or non-anthracyclines if clinically contraindicated) and Karnofsky Prognostic Score  $\geq 70$  were randomized to Gemcitabine and Paclitaxel (G 1250 mg/m<sup>2</sup> d1,8; T 175 mg/m<sup>2</sup> d1) or Paclitaxel (175 mg/m<sup>2</sup> d1) q21d until progressive disease. Between 8/99 and 4/02, 529 pts were randomized (267 Gemcitabine and Paclitaxel and 262 Paclitaxel) at 98 sites. Median age was 53 yrs. Arms were balanced; >70% had visceral metastases, 75% had >2 sites of metastatic disease, one-third had receptor-positive disease, and 96% had prior anthracyclines. Median cycles given were 6 for Gemcitabine and Paclitaxel and 5 for Paclitaxel. Median TTP was 5.4 mos (95% CI, 4.6-6.1 mos) for Gemcitabine and Paclitaxel and 3.5 mos (95% CI, 2.9-4.0 mos) for Paclitaxel (p=0.0013). The Hazard ratio was 0.734 (95% CI, 0.607-0.889; p=0.0015) with an increased probability of ~50% for Gemcitabine and Paclitaxel of being progression-free at 6 mos. PFS was significantly better with Gemcitabine and Paclitaxel (p=0.0021). ORR was 39.3% (95% CI, 33.5%-45.2%) for Gemcitabine and Paclitaxel and 25.6% (95%



CI, 20.3%-30.9%) for Paclitaxel ( $p=0.0007$ ). Gemcitabine and Paclitaxel had numerical improvement in analgesic level, pain relief, and global QoL ( $p=NS$ ). CTC grade 4 hematologic toxicity was more pronounced with Gemcitabine and Paclitaxel vs Paclitaxel (17.2% vs 6.6% neutropenia, 1.1% vs 0.4% anemia, 0.4% vs 0% thrombocytopenia, 0.4% vs 0% F/N). Non-hematologic toxicity was manageable in both arms. There was 1 toxic death per arm. Conclusions: Gemcitabine and Paclitaxel demonstrated significant efficacy advantages over Paclitaxel in pts with MBC. Toxicity was manageable and expected.(72)

**Figure 11 Registration Study for Gemcitabine: Randomized studie of Gemcitabine and Paclitaxel in Patients Metastatic Breast Cancer**

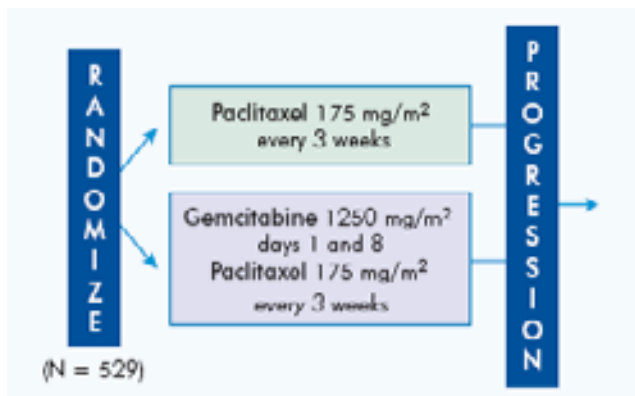

At the ASCO 2005 Annual Meeting in Orlando, USA, Chan et al. reported the results of a prospective phase III study comparing Gemcitabine-Docetaxel with Capecitabine-Docetaxel as first- or second-line treatment in metastatic breast cancer patients pretreated with an anthracycline. Primary objective was progression-free survival (PFS); secondary objectives were overall response rate (ORR), time to treatment failure (TtTF), overall survival (OS), toxicity, and quality of life (QOL). 305 patients with histologically confirmed metastatic breast cancer who relapsed after an anthracycline-based regimen either in neoadjuvant or first-line metastatic disease were randomized to Gemcitabine-Docetaxel (G 1000 mg/m<sup>2</sup> d1,8; D 75 mg/m<sup>2</sup> d1) or Capecitabine-Docetaxel (C 2500 mg/m<sup>2</sup> d1-14; D 75 mg/m<sup>2</sup> d1) q21 days; neoadjuvant pretreatment with taxanes was allowed if completed >6 months before entry.



**Figure 12 Study Design of a European phase III study GD vs. CD**

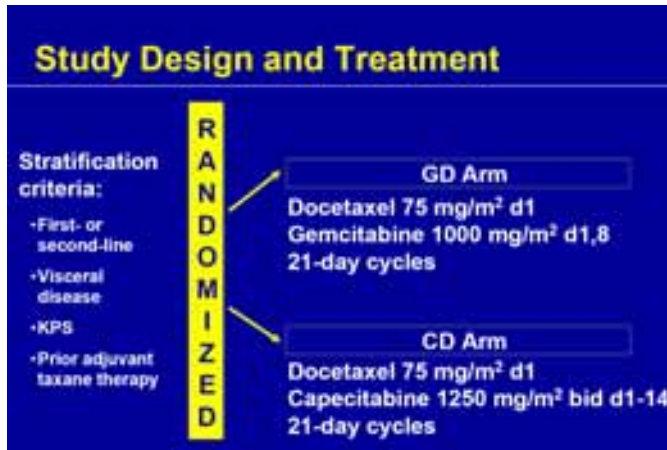

17% of the patients received prior taxane; 34% received prior chemotherapy for metastatic disease. At time of analysis, 287 pts were evaluable for safety and 229 for response. On Gemcitabine-Docetaxel arm, pts received 754 cycles; 642 cycles were given on Capecitabine-Docetaxel arm. ORR was 27% (95% CI, 18.4%-34.7%) for Gemcitabine-Docetaxel, and 31% (95% CI, 22.6%-39.5%) for Capecitabine-Docetaxel (p=.4537).

**Figure 13 Kaplan Meier analysis for time to treatment failure**

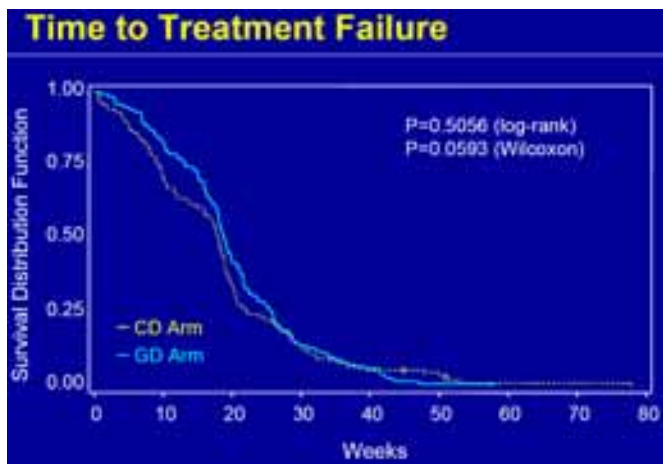

CTC grade 3/4 hematologic toxicity was similar in both arms, but febrile neutropenia was higher in Capecitabine-Docetaxel arm (12% vs 7%).





**Figure 14 Hematologic Toxicity depending on treatment combination**

| <b>Grade 3/4 Hematologic Toxicity</b> |                |         |                |         |
|---------------------------------------|----------------|---------|----------------|---------|
| Toxicity, n (%)                       | GD Arm (N=152) |         | CD Arm (N=150) |         |
|                                       | Grade 3        | Grade 4 | Grade 3        | Grade 4 |
| Febrile neutropenia                   | 7 (5)          | 5 (3)   | 10 (7)         | 9 (6)   |
| Neutropenia                           | 45 (30)        | 84 (55) | 37 (25)        | 86 (57) |
| Leukopenia                            | 89 (59)        | 32 (21) | 64 (43)        | 35 (23) |
| Thrombocytopenia*                     | 15 (10)        | 1 (<1)  | 3 (2)          | 2 (1)   |
| Anemia                                | 6 (4)          | 5 (3)   | 3 (2)          | 1 (<1)  |

Nonhematologic toxicity was low in both arms, but diarrhea (17% vs 7%), mucositis (16% vs 4%), and hand-foot syndrome (24% vs 0%) were more pronounced in Capecitabine-Docetaxel arm. More serious adverse events occurred in Capecitabine-Docetaxel arm (36% vs 28%), causing discontinuation in 27% (Capecitabine-Docetaxel arm) and 14% (Gemcitabine-Docetaxel arm) of pts. There were 2 toxic deaths, both in Capecitabine-Docetaxel arm.

**Figure 15 Non-Hematologic Toxicity depending on treatment combination**

| <b>Grade 3/4 Nonhematologic Toxicity*</b> |                |         |                |         |
|-------------------------------------------|----------------|---------|----------------|---------|
| Toxicity, n (%)                           | GD Arm (N=152) |         | CD Arm (N=150) |         |
|                                           | Grade 3        | Grade 4 | Grade 3        | Grade 4 |
| Hand-foot syndrome†                       | 0              | 0       | 39 (26)        | 0       |
| Diarrhea†                                 | 11 (7)         | 1 (<1)  | 25 (17)        | 2 (1)   |
| Mucositis†                                | 6 (4)          | 0       | 20 (13)        | 6 (4)   |
| Nausea/vomiting                           | 13 (9)         | 0       | 8 (5)          | 0       |
| Abdominal pain                            | 1 (<1)         | 0       | 5 (3)          | 0       |
| Asthenia                                  | 11 (7)         | 0       | 16 (11)        | 0       |
| Alopecia                                  | 12 (8)         | 0       | 11 (7)         | 0       |
| Fatigue                                   | 6 (4)          | 0       | 4 (3)          | 0       |
| Myalgia                                   | 5 (3)          | 1 (<1)  | 3 (2)          | 1 (<1)  |
| AST/ALT                                   | 12 (8)         | 0       | 7 (5)          | 0       |
| Alkaline phosphatase                      | 5 (3)          | 0       | 3 (2)          | 0       |

The authors concluded that Gemcitabine-Docetaxel demonstrated similar efficacy to Capecitabine-Docetaxel in pts with MBC. Nonhematologic toxicity was higher in the Capecitabine-Docetaxel arm.

The available data on the combination of gemcitabine and taxanes justify the use of this combination as experimental treatment in this study for the following reasons:

- Gemcitabine is highly effective in breast cancer



- Gemcitabine and docetaxel might develop synergistic efficacy
- Toxicity profiles of the two substances combine favorably

## 2.5 Endocrine Therapy

Updated results have demonstrated a remarkable risk/benefit ratio for endocrine therapeutic agents in general. It is therefore essential that patients with high risk for recurrence (i.e. all patients recruited into this study) should receive optimal endocrine therapy in case of positive hormone receptor status ( $\geq 10\%$  positively stained cells for estrogen and/or progesterone) of the primary tumor.

**Tamoxifen**, a first generation selective estrogen receptor modulator, has been studied most extensively. The cellular actions of tamoxifen are not completely understood, but it appears that the drug's antiproliferative effects are mediated primarily by inhibition of the activities of estrogen through binding to estrogen receptors. Disease-free and overall survival rates have been increased in postmenopausal women with ER-positive tumors when tamoxifen has been used as adjuvant therapy (irrespective of nodal status). In premenopausal women, adjuvant therapy with tamoxifen has been associated with prolongation of disease-free survival, while its impact on survival is strongly assumed.(73) However, it has also conclusively been shown that the benefit of tamoxifen does not accrue to those with estrogen receptor negative primary tumors. Other selective estrogen receptor modulators, such as raloxifen, have not been studied sufficiently to proof comparable efficacy as tamoxifen and therefore will not be used in this study.

The development of third-generation aromatase agents led to a significant advance in the treatment of metastatic breast cancer.(74) Aromatase agents result in a total blockade of the peripheral aromatization of androgens in muscle, fat, skin and breast, required for estrogen synthesis. Therefore, estrogen levels in postmenopausal women are suppressed to approximately 1-10% of pretreatment levels. Whereas in metastatic breast cancer, aromatase agents are established as either first- or second-line therapy for postmenopausal women, only preliminary data for the adjuvant setting are available. In the ATAC trial, comparing five years of tamoxifen versus five years of anastrozole versus five years of both agents in combination, 9366 postmenopausal with positive or unknown hormone receptor status were accrued. A recent update of the efficacy analysis after a median follow-up of 47 months confirmed anastrozole to be superior to tamoxifen in all major efficacy endpoints. DFS estimates were 86.9 % and 84.5 % for anastrozole and tamoxifen, respectively. In the subgroup of hormone receptor positive patients, the benefit for anastrozole was even more apparent (89.0 % vs. 86.1 %). The combination arm showed no significant difference to tamoxifen alone.(75) In the final analysis, presented at the SABCs 2004 meeting, despite the robust benefit for disease free survival, no significant difference in overall survival for the anastrozole group could be demonstrated. After 68 months of follow-up the hazard ratio for overall survival was 0,97 (p=0.7).(76)





**Figure 16 Disease Free Survival of the ATAC Trial(77)**

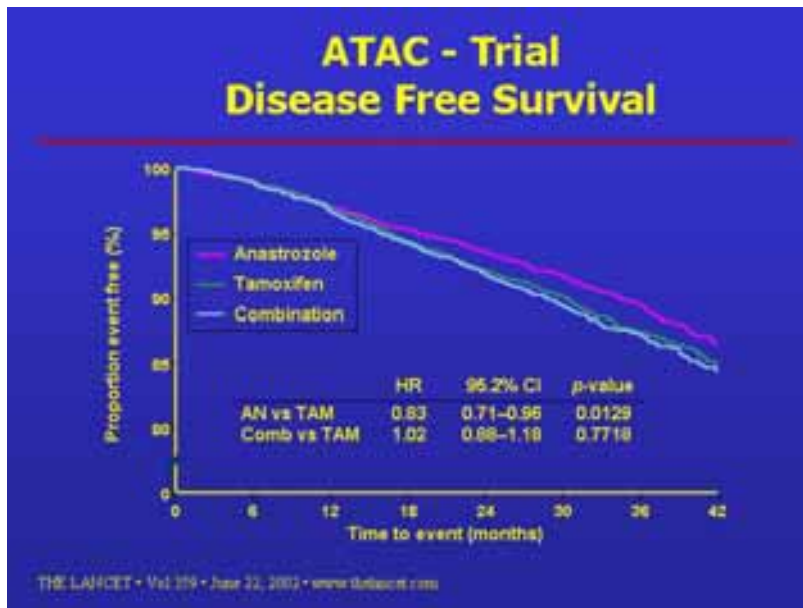

More promising results have been achieved with sequential endocrine treatments, switching from 2-3 years to Tamoxifen to an aromatase inhibitor. The first trial which examined this setting was the IES 031 trial, studying 4742 postmenopausal patients which were randomised after 2-3 years tamoxifen to continue tamoxifen or switch to exemestane to complete a total of 5 years adjuvant endocrine therapy. The primary end point was disease free survival.(78) After a median follow-up of 30.6 months, 449 first events (local or metastatic recurrence, contralateral breast cancer, or death) were reported--183 in the exemestane group and 266 in the tamoxifen group. The unadjusted hazard ratio in the exemestane group as compared with the tamoxifen group was 0.68 (95 percent confidence interval, 0.56 to 0.82; P<0.001 by the log-rank test), representing a 32 percent reduction in risk and corresponding to an absolute benefit in terms of disease-free survival of 4.7 percent (95 percent confidence interval, 2.6 to 6.8) at three years after randomization.

**Figure 17 Disease Free Survival of the IES 031 Trial(78)**

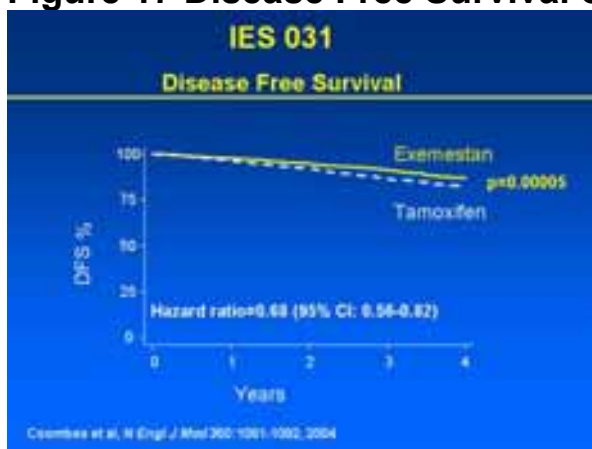

The overall survival was not significantly different in the two groups, with 93 deaths occurring in the exemestane group and 106 in the tamoxifen group. However, in an Up-Date of this study, presented at the SABCS 2004 meeting, the hazard ratio for overall survival was 0.85 OS, which almost reached statistical significance ( $p=0.08$ ).<sup>(79)</sup>

In another trial, presented at the SABCS 2004, the sequential endocrine treatment, consisting of 2 years of Tamoxifen, followed by 3 years of Anastrozol, was analyzed. The ARNO 95 and ABCSG 8 trials were being conducted to assess whether switching to anastrozole after two years of tamoxifen treatment is more effective than continuing tamoxifen treatment for the remaining three years of adjuvant therapy. The trials were similar in design and broadly similar with regard to inclusion criteria. The results of a prospectively planned event-driven combined analysis of these trials were presented at the SABCS 2004. The primary endpoint was recurrence-free survival (DFS).<sup>(80)</sup>

**Figure 18 ABCSG 8 – ARNO 95 Study Design<sup>(80)</sup>**

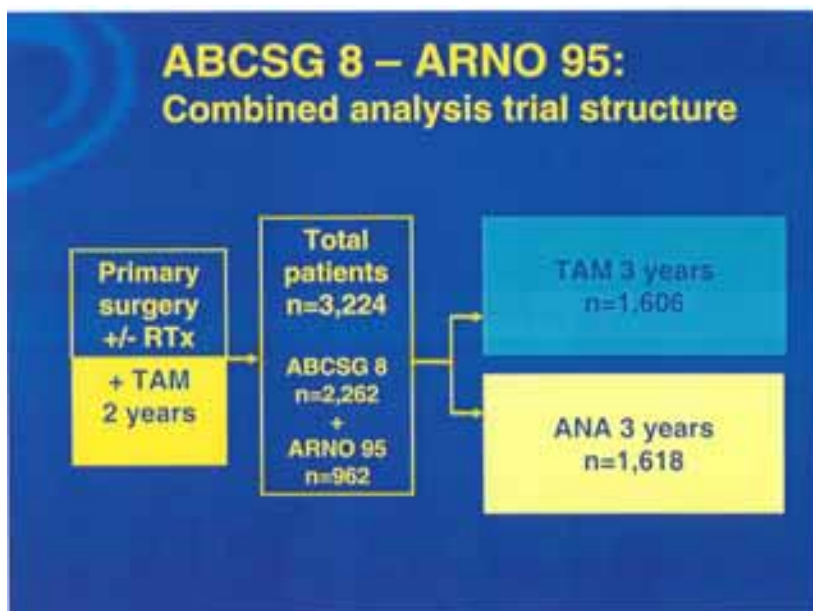

Of the 3,123 patients included in the trials (2,176 in ABCSG 8 and 947 in ARNO 95), 1,563 were randomized to switch to anastrozole, with 1,560 continuing to receive tamoxifen. Mean age was 63 years (range 41-80), 27% of patients were node-positive, 100% were hormone receptor-positive (estrogen receptor-positive, progesterone receptor-positive, or both) and no patients received chemotherapy. After a median follow-up of 26 months, 143 events (local or metastatic recurrence, or contralateral breast cancer) have been reported. The hazard ratio for RFS with anastrozole versus tamoxifen was 0.59 (95% CI= 0.42-0.82;  $p<0.0009$ ).<sup>(80)</sup> Based on this evidence, anastrozole has received an restricted approval for the hormone receptor positive, postmenopausal patients in the European Community, and therefore maybe prescribed without further restrictions.



**Figure 19 Disease Free Survival of the ABCSG 8 – ARNO 95 Trial(80)**

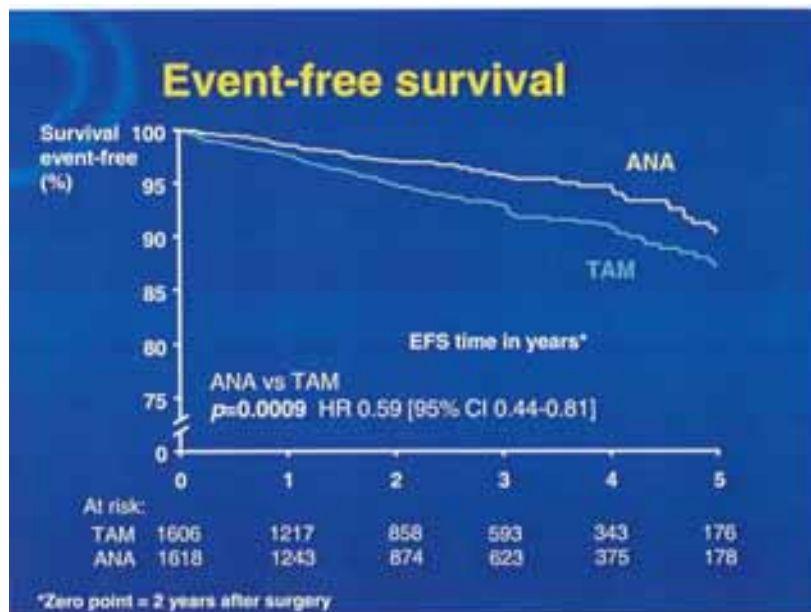

For receptor-positive, premenopausal women ovarian ablation by surgical means (i.e. laparoscopic oophorectomy) or by pelvic irradiation as one-time treatment offers a reduction in the annual odds of death of 24 %, (25) which is comparable to the results of multi-agent chemotherapy. (81) However, there are concerns about its permanence leading to indefinite loss of childbearing, and the potential of long-lasting adverse effects on heart and bone. For this reason, **goserelin** has been tested extensively as a component of adjuvant therapy for breast cancer. (82;83) Goserelin is a gonadotropin-releasing hormone (GnRH) agonist. Continuous pituitary stimulation by GnRH, normally under pulsatile control, leads to an eventual downregulation of LH and FSH secretion with subsequent diminution of androgen levels. Even though there are no definite results available to answer the question, whether the addition of goserelin to chemotherapy and tamoxifen provides adequate benefit, an update of the results by Davidson et al. suggests that the effects of adjuvant tamoxifen may be greater among women who have had cessation of ovarian function as a result of either chemotherapy alone or chemotherapy plus goserelin. (84) In this study, enrolling 1,537 patients, premenopausal patients were randomized to six cycles of FAC-chemotherapy, FAC + goserelin and FAC + goserelin and tamoxifen. The overall survival rate for the three groups was 77 %, 78 % and 80 %, respectively. In an update, presented at the 2003 ASCO Annual Meeting, exploratory retrospective subset analysis showed a trend towards a benefit with the addition of goserelin after FAC for women <40 yr, women with premenopausal estradiol level after FAC, or those not amenorrheic after FAC. (3)

The following table shows the 9 yr survival data in respect to treatment combination and menopausal status:



|                       | CAF(%) | CAF-Z(%) | CAF-ZT(%) |
|-----------------------|--------|----------|-----------|
| 9yrDFS-all            | 57     | 60       | 68        |
| 9yrOS-all             | 70     | 73       | 76        |
| 9yrDFS-amenorrhoea    | 59     | 61       | 71        |
| 9yrDFS-no amenorrhoea | 40     | 55       | 60        |

In the Zoladex Early Breast Cancer Research Association Trial (ZEBRA) there was no significant difference in outcome after the first 2.5 years of follow-up among goserelin treated patients who continued to be amenorrhoeic and those whose menses returned.(85) This raises the possibility that a period of transient amenorrhoea is sufficient to improve the survival of premenopausal women with hormone receptor positive tumors.(86)

Based on the evidence summarized above, in this study, postmenopausal patients with positive hormone receptor status of the primary tumor will receive tamoxifen treatment 20 mg p.o. per day for 2 years, after the end of chemotherapy, followed by anastrozole 1 mg p.o. per day for 3 years. In case of contraindications against tamoxifen or severe adverse effect during the treatment with tamoxifen, anastrozole will be given before the end of the initial 2 years. In addition to tamoxifen, all patients with positive hormone receptor status of the primary tumor and under the age of 40 or restart of menstrual bleeding within 6 months after the completion of cytostatic treatment or with premenopausal hormone levels as defined below will receive goserelin (Zoladex®) 3.6 mg subcutaneously every 4 weeks over a period of 2 years.(2;3) Premenopausal endocrine status will be assumed, if the following serum levels are met: LH < 20 mIE/ml, FSH < 20 mIE/ml and E<sub>2</sub> > 20 pg/ml. Therapy will start after the end of chemotherapy. Patients, who meet the above named criteria for premenopausal status will stay on Tamoxifen treatment for a total of 5 years and will not switch to anastrozole.

## 2.6 Trastuzumab in the adjuvant treatment of breast cancer

Growth factors and their receptors are known to play critical roles in cell development, growth, and differentiation.(87) Many receptors possess intrinsic tyrosine kinase activity that is activated upon interaction of the receptor with its cognate ligand. The human epidermal growth factor receptor-2 (HER2) is coded by a proto-oncogene mapped to chromosome 17q21.(88) The HER2 gene has homology with the rodent gene neu, and is also referred to as HER2/neu or c-erbB-2. The HER2 gene encodes a 185 kD transmembrane glycoprotein (p185HER2) with tyrosine kinase activity. An overexpression of the HER2 receptor (about 10- to 100-fold compared to normal cells) is observed in a number of primary tumors, suggesting that the overexpression of this growth factor receptor may contribute to transformation and tumorigenesis. In most cases, HER2 protein overexpression is thought to result from gene amplification.(89-92) Approximately 25% to 30% of patients with breast and ovarian cancers overexpress HER2.(93) Similar correlations may exist for other epithelial tumors (lung adenocarcinoma, gastric cancers etc.).

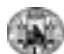

Several lines of evidence support a direct role for p185HER2 expression in the pathogenesis and poor clinical course of human tumors. First, mutation of the rat neu proto-oncogene is associated with the induction of neuroblastomas.(94;95) Second, when the gene is transfected into mouse fibroblast cells (NIH-3T3) it causes transformation, and the resulting cells are tumorigenic in the nude mouse.(96;97) Studies using a non-mutated, human HER2 gene have demonstrated that NIH-3T3 cell transformation efficiency, as well as tumorigenicity in the nude mouse, are directly related to the level of HER2 gene expression.(98)

Additionally, studies utilizing the mutated rat neu gene to develop transgenic mice have revealed that animals expressing high levels of the mutated neu transgene (99) as well as normal neu (100) develop breast cancer. Finally, specific antibodies to the extracellular domain of the membrane-based protein encoded by the neu gene or the human HER2 gene inhibit the growth of tumors that overexpress the gene.(101-103) These data are consistent with a direct role for the HER2 proto-oncogene in both malignant transformation and enhanced tumor genicity, and indicate a potential target for cancer therapy.

The role of HER2/neu overexpression as independent prognostic factor by means of time to disease relapse and overall survival in women with breast cancer was described for the first time by SLAMON et al.in 1987. In the meantime, the prognostic importance of HER2/neu overexpression has been confirmed in several analyses.(104-106) However, the independence of this factor may be varying in different groups and stages of the disease, and currently remains a point of discussion.(107) The same holds for the predictive value of HER2 overexpression, i.e. its influence on the probability of therapy success.(107-116)

To improve the course of patients with HER2 overexpressing breast cancer by antagonizing the abnormal function of overexpressed HER2, murine monoclonal antibodies (muMAbs) were produced against the extracellular domain of the HER2 receptor to inhibit the proliferation of human tumor cells overexpressing p185HER2. The most encouraging results were obtained with muMAb 4D5, which produced significant antiproliferative effects in vitro against human breast cell lines that overexpress the HER2 receptor.(117) MuMAb 4D5 has no effect on cell lines that do not overexpress the receptor.(118)

Preclinical in vivo studies with muMAb 4D5 were conducted using both human breast and ovarian cancer heterotransplants from surgical excised human tumor specimens. The tumors were characterized to determine which had amplification/overexpression of the HER2 gene/protein. Results of these studies again established a clear antiproliferative effect against those human tumors characterized by overexpression of the HER2 receptor. No effect was seen on tumor xenografts that did not overexpress the receptor.

The clinical use of therapeutic murine monoclonal antibodies is usually limited because they are immunogenic and the development of neutralising human anti-murine antibodies often precludes repeated administration in patients. To avoid this probable limitation with muMAb 4D5 during clinical use, a humanised chimeric monoclonal antibody containing the hypervariable antigen-binding portions of muMAb 4D5 and a human immunoglobulin variable region framework was constructed.(119) The resulting recombinant humanised anti-HER2 monoclonal antibody was



trastuzumab (rhuMAbHER2), which is 95% human and 5% murine.(119)

Data from four open-label single agent clinical trials (335 patients) and one randomized, controlled clinical trial in combination with chemotherapy support the use of trastuzumab in patients with metastatic breast cancer who have tumors that overexpress HER2.

Trastuzumab was studied as a single agent in four multicenter, open-label, single-arm clinical trials. The largest study recruited 222 patients with HER2 overexpressing metastatic breast cancer who had relapsed following one or two prior chemotherapy regimens for metastatic disease.(120) Patients were treated with 2 mg/kg trastuzumab IV weekly. Patients had extensive prior therapy: 68% had prior adjuvant chemotherapy, 32% had one and 68% had two previous chemotherapy regimens for metastatic disease, and 26% had prior myeloablative treatment with hematopoietic rescue. The overall response rate (CR + PR) in the patients treated with trastuzumab, as determined by an independent Response Evaluation Committee (REC), was 16%, with a 4% complete response and a 12% partial response rate.

The median duration of response as determined by the REC was 9.1 months (range 1.6 to >26 months). Among all treated patients, the median time to disease progression was 3.1 months (range 0 to >28 months). The median survival for all enrolled patients was 13 months (range 0.5 to >30 months). At 5.8 months, 24% of treated patients were free of progression. Quality of life in terms of 'global quality of life' and 'social function', measured by the EORTC QLQ-C30, was significantly improved during treatment; no change was seen in physical or role function and in fatigue.(121)

A further study evaluated the effect of trastuzumab as a single agent in 113 patients with HER2 overexpressing metastatic breast cancer with no prior chemotherapy for metastatic disease. Patients were treated with 2 mg/kg trastuzumab IV weekly or 4 mg/kg IV weekly until progression. The overall response rate (CR + PR) was 24% for patients treated with 2 mg/kg and 22% for patients treated with 4 mg/kg.(122)

The most comprehensive data originate from a prospective randomized trial performed on 469 patients. Patients were randomly assigned to receive standard chemotherapy (anthracycline and cyclophosphamide or paclitaxel in case anthracycline-pretreatment) or standard chemotherapy plus trastuzumab.(123) The addition of trastuzumab to chemotherapy was associated with a longer time to disease progression ( $p < 0.001$ ), a higher rate of objective response ( $p < 0.001$ ), a lower rate of death at one year ( $p = 0.008$ ) longer survival ( $p = 0.046$ ), and a 20 percent reduction in the risk of death. The most important adverse event in this study was cardiac dysfunction, which occurred in 27 percent of the group given anthracycline, cyclophosphamide and trastuzumab; 8 percent of the group given an anthracycline and cyclophosphamide alone and 13 percent of the group with paclitaxel and trastuzumab.

At the recent 24th San Antonio Breast Cancer Symposium Dec. 2001, the latest update on several clinical studies with trastuzumab was presented.

In the randomized trial on 469 patients, the addition of Herceptin to chemotherapy improved the RR in the FISH-positive subgroup (54.0% vs 30.8%;  $P < 0.0001$ ), but no

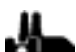



such improvement was seen in the FISH-negative subgroup (38.0% vs 37.5%; P=NS).(124) The addition of Herceptin to chemotherapy in the FISH-positive group also provided a significant survival benefit (OR, 0.71; 95% CI, 0.54, 0.92; P=0.009) that was not detected in the FISH-negative group (OR, 1.11; 95% CI, 0.70, 1.80; P=NS). The group of HER2-positive patients in this study >60 years of age appeared to have a worse overall outcome compared with the group ≤60 years of age, possibly related to adverse baseline characteristics.(125) However, in the group >60 years of age, the survival benefit seen with the addition of Herceptin to chemotherapy was significant (odds ratio, 0.64; 95% CI, 0.41-0.99). These data suggest that older (age >60 years) patients with metastatic breast cancer should be considered for first-line use of Herceptin plus chemotherapy.

At the ASCO 2005 Annual Meeting in Orlando, USA, the first prospective data on the efficacy of trastuzumab in the adjuvant treatment of breast cancer were presented. In summary, the data strongly suggest a significant and clinically most relevant benefit in terms of disease free and overall survival, if patients with HER2-positive breast cancer are treated with trastuzumab for one year following chemotherapy.

In the combined analysis of the NSABP-B31/NCCTG-N9831 studies (Doxorubicin and Cyclophosphamide Followed by Paclitaxel with or without Trastuzumab as Adjuvant Therapy for Patients with HER-2 Positive Operable Breast Cancer by Romond EH et al.), more than 3.300 patients were randomized between a sequential AC-Paclitaxel chemotherapy, followed or not by one treatment of trastuzumab. In summary, the results showed that for node positive HER-2 positive breast cancer, trastuzumab given concurrently with paclitaxel following AC chemotherapy, reduces the risk of a first breast cancer event at 3 years by 52%. The relative risk reduction benefit was present and of similar magnitude in all subsets of patients analyzed. The addition of trastuzumab reduced the probability of distant recurrence by 53% at 3 years, and the hazard of developing distant metastases appears, thus far, to decrease over time.

**Figure 20 Disease free survival of NSABP B-31 and N9831 separately**

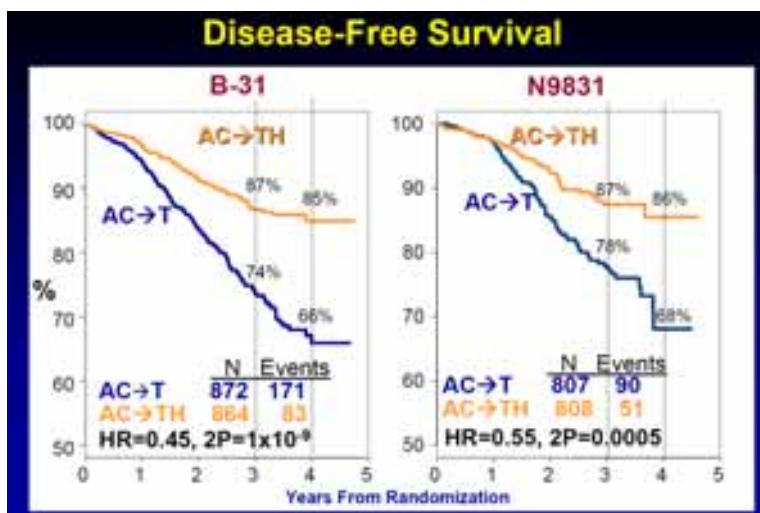

**Figure 21 Kaplan Meier analysis of combined analysis for DDFS**

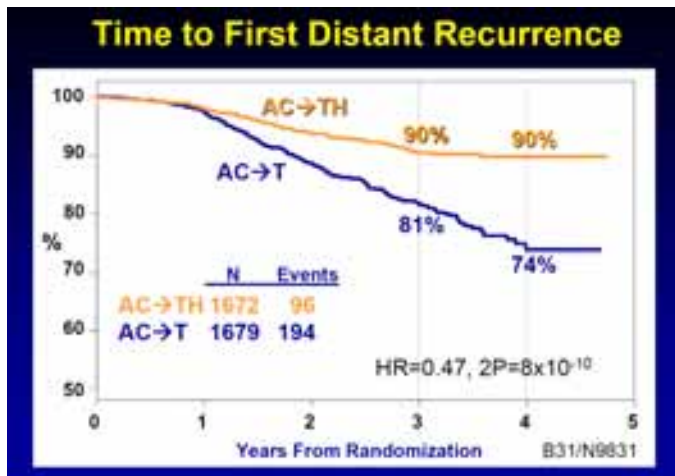

The results at a median follow-up of 2 years also showed a statistically significant survival advantage with a relative risk reduction of 33%. However, the combination of trastuzumab and chemotherapy has a significant risk of cardiac toxicity. The authors conclude that careful monitoring of cardiac function is of vital importance if trastuzumab is to be used in the adjuvant setting.

**Figure 22 Kaplan Meier analysis of combined analysis for OS**

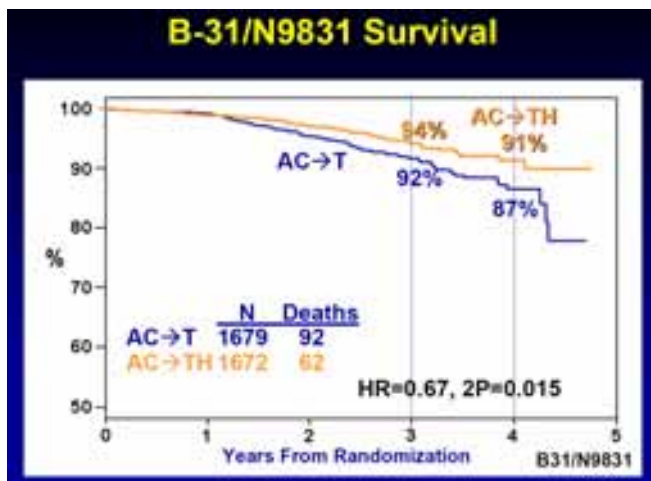

The results were in essence confirmed by the HERA-Study, which was presented by M. Piccart-Gebhardt. The HERA-Study was a randomized three-arm multi-centre comparison of 1 year trastuzumab, 2 years trastuzumab or no trastuzumab in women with HER-2 positive primary breast cancer who have completed adjuvant chemotherapy. At one year median follow-up, trastuzumab given every 3 weeks for one year following adjuvant chemotherapy, significantly prolonged disease free survival and recurrence free survival for women with HER-2 positive early breast cancer. Trastuzumab also significantly reduced the risk of distant metastases. These





benefits were independent of patients' baseline characteristics (nodal status, hormone receptor status, ...) and of type of adjuvant chemotherapy received.

**Figure 23 Kaplan Meier analysis of the HERA Study for DFS**

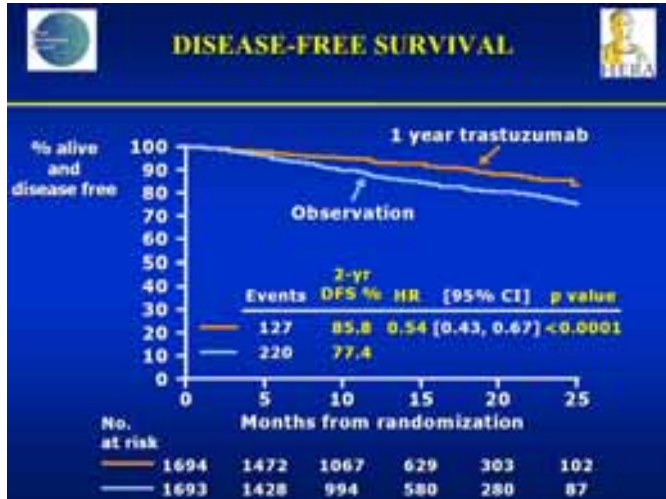

Overall survival was not significant between the study groups at the time of interim analysis. Trastuzumab therapy was associated with a low incidence of severe symptomatic congestive heart failure.

**Figure 24 Kaplan Meier analysis of the HERA Study for DDFS and OS**

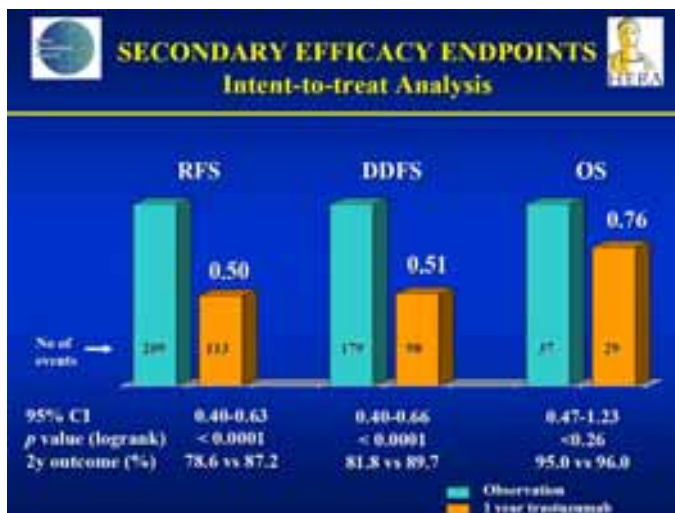

Based on these data, the application of trastuzumab for one year, following the cytostatic treatment will be permitted in this study for all patients with HER2-positive



breast cancer, as defined by the following tests:

- Immunohistochemistry +++
- FISH (fluorescence in situ hybridization) positive

All safety measures have to be undertaken, which are recommended for trastuzumab, as outlined by the German AGO Breast Cancer guidelines ([www.ago-online.org](http://www.ago-online.org)).

## 2.7 Bisphosphonates in the adjuvant treatment of breast cancer

While the role of bisphosphonates is well established as effective treatment of bone metastases in breast cancer, its role in the adjuvant setting is still under debate. In summary, the administration of bisphosphonates may have two beneficial effects:

- Prevention of adverse effects of long term cancer treatment on bone health
- Reduction of the risk for relapse by its potential anti-tumor potency.

Bone is the most frequent site of distant relapse, accounting for around 40% of all first recurrences.(126) In addition to the well-recognised release of bone cell activating factors from the tumor, it is now appreciated that release of bone-derived growth factors and cytokines from bone under resorption can both attract cancer cells to the bone surface and facilitate their growth and proliferation.(127) Inhibition of bone resorption could therefore have an effect on the development and progression of metastatic bone disease, and is an adjuvant therapeutic strategy of potential importance. In the adjuvant setting, antitumoral activity of bisphosphonates through apoptosis mechanisms, anti-angiogenesis and inhibition of intracellular signal-transduction might increase the risk for relapse.

Encouraging animal studies with a variety of animal tumor models and a range of bisphosphonates have shown inhibition of bone metastasis development and a reduction in tumor burden within bone.(127;128) More recently, several clinical trials have been reported using the relatively low potency oral bisphosphonate, clodronate. In the largest study, 1079 women with primary operable breast cancer were randomised to either clodronate 1600mg daily or placebo for two years, in addition to standard adjuvant systemic treatment. Recent data presented with a median follow-up time of five years revealed a non-significant reduction in the frequency of bone metastases in the clodronate-treated patients (63 (12%) v 80 (15%) patients,  $p=0.127$ ).(129) During the two years on active treatment there was a reduction in bone metastases but this disappeared on discontinuation of the study drug, suggesting that adjuvant bisphosphonate treatment trials in the future should test a longer duration of treatment. There was no effect on non-bone recurrence (112 (21%) v 128 (24%) patients,  $p=0.26$ ) but, despite little effect on the primary endpoint (bone recurrence), patients randomised to the clodronate arm had a better survival ( $p=0.047$ ).



## Figure 25 Bone Metastasis-Free Survival of the Royal Marsden Study(129)

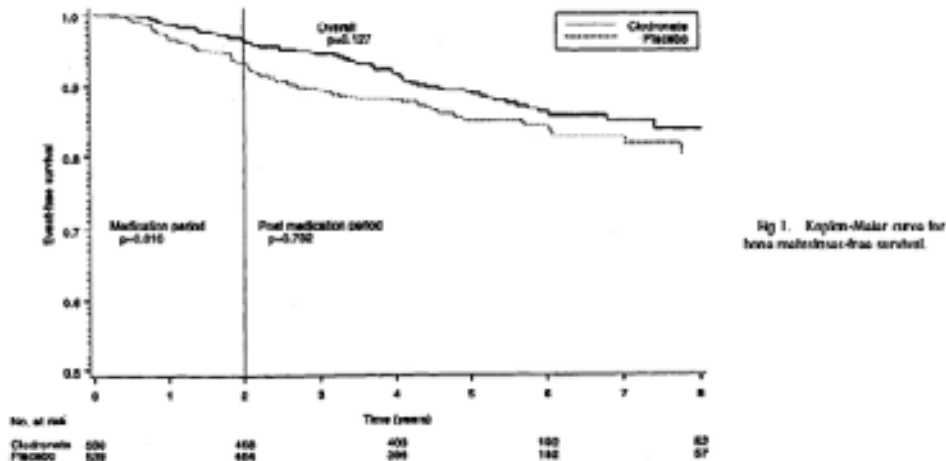

Fig 1. Kaplan-Meier curve for bone metastasis-free survival.

## Figure 26 Nonskeletal Metastasis-Free Survival of the Royal Marsden Study(129)

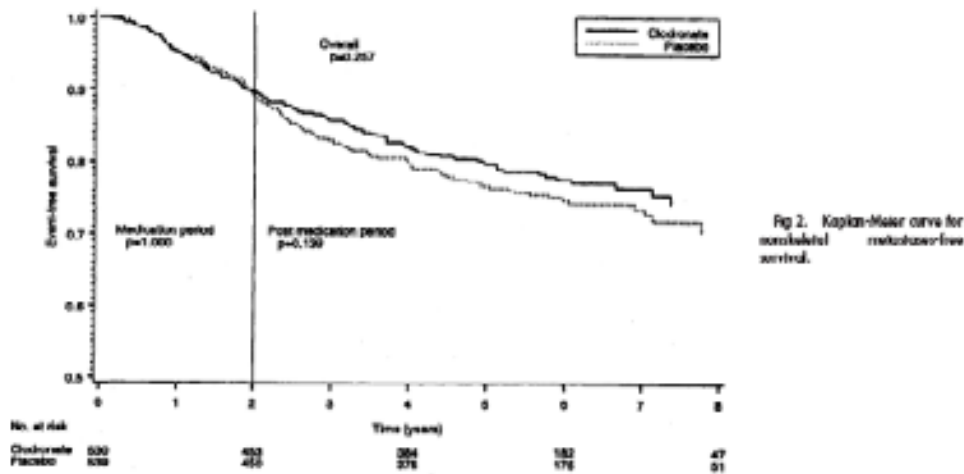

Fig 2. Kaplan-Meier curve for nonskeletal metastasis-free survival.

In a second study, Diel et al studied 302 breast cancer patients randomly allocated to either oral clodronate 1600mg daily (n=157) for three years or a control group (n=145). These women had no overt evidence of metastatic disease, but were selected for the trial on the basis of immunocytochemical detection of tumor cells in the bone marrow, a known risk factor for the subsequent development of distant metastases.(130) Patients received appropriate adjuvant chemotherapy and endocrine treatment. There were no discernable prognostic or treatment imbalances between the two groups, and the follow-up schedules were similar. The median observation period was 36 months. The incidence of osseous metastases was significantly lower in the clodronate group (11 (7%) versus 25 (17%) patients,  $p < 0.002$ ). There was also an unexpected large reduction in the incidence of visceral metastases in the clodronate group (19 (13%) versus 42 (29%) patients,  $p < 0.001$ ). Subsequently these results have been updated(131) and show similar results,



although the striking effect on extra-skeletal visceral relapse seen in the earlier report is less, and no longer statistically significant.

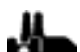

**Figure 27 Metastasis-Free and Overall Survival of the Heidelberg Study(130)**

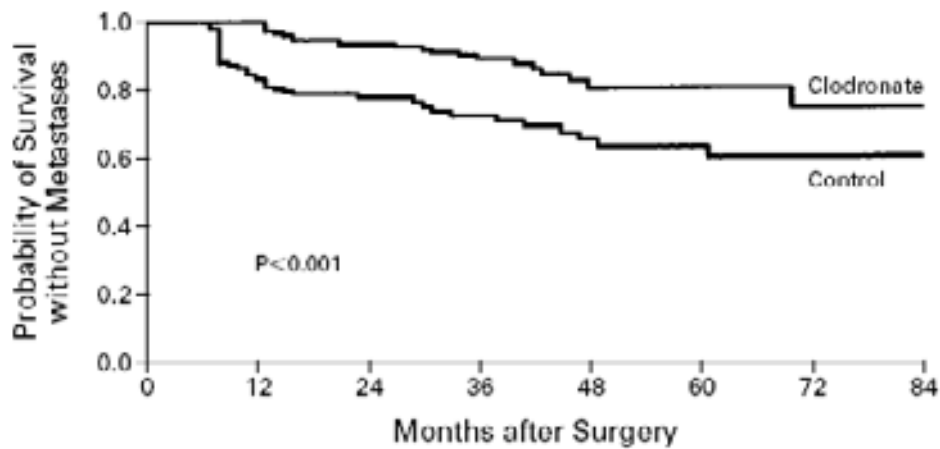

| No. of Patients |     | 0   | 12  | 24 | 36 | 48 | 60 | 72 | 84 |
|-----------------|-----|-----|-----|----|----|----|----|----|----|
| Clodronate      | 157 | 146 | 119 | 71 | 36 | 21 | 13 | 8  |    |
| Control         | 145 | 120 | 87  | 49 | 31 | 22 | 7  | 5  |    |

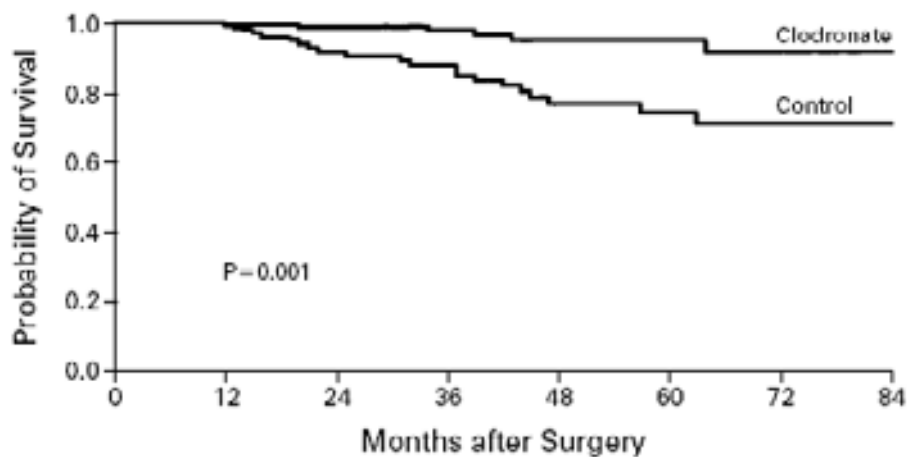

| No. of Patients |     | 0   | 12  | 24 | 36 | 48 | 60 | 72 | 84 |
|-----------------|-----|-----|-----|----|----|----|----|----|----|
| Clodronate      | 157 | 146 | 126 | 80 | 45 | 28 | 17 | 10 |    |
| Control         | 145 | 142 | 100 | 62 | 38 | 28 | 10 | 5  |    |

**Figure 1. Kaplan-Meier Curves for Metastasis-free Survival and Overall Survival after Primary Surgery among 157 Patients Treated with Clodronate and 145 Controls.**

Values were derived with the log-rank test. The numbers of patients below the panels are the numbers at risk.

The exciting findings of the Diel study must, however, be viewed in the light of a further trial which produced conflicting results. Saarto et al(132) randomised 299 women with primary node-positive breast cancer to oral clodronate 1600mg daily (n=149) or a control group (n=150). The median follow-up was five years. Treatment with clodronate in this study did not lead to a reduction in the development of bone metastases (29 (19%) v 24 (16%) patients, p=0.27 for the clodronate and control groups, respectively). Additionally the development of non-skeletal recurrence was



significantly higher in the clodronate group (60 (40%) versus 36 (24%) patients,  $p = .0007$ ) and, most importantly, the overall five-year survival was significantly lower in the clodronate group (70% versus 83%,  $p = 0.009$ ). In a 10 year follow-up, which was recently presented, these results were basically confirmed. Within 10 years bone metastases were detected at the same frequency in the clodronate and control groups: 44 (32%) vs. 42 (29%), respectively, ( $p=0.35$ ). The frequency of non-skeletal recurrences (visceral and local) was significantly higher in the clodronate group 69 (50%) as compared with the controls 51 (36%) ( $p=0.005$ ). Ten-year disease-free survival (DFS) remained significantly lower in the clodronate group (45% vs. 58%,  $p=0.01$ , respectively). This was especially seen in oestrogen receptor negative patients (25% vs. 58%,  $p=0.004$ , respectively). No significant overall survival difference was found between the groups. As previously reported 3-year adjuvant clodronate treatment did not prevent the development of bone metastases in node-positive breast cancer patients.(133) It is possible that there were some prognostic imbalances favouring the control group, but the safest assumption is to consider that the Diel and Saarto studies cancel each other out and probably reflect the usual heterogeneity of results seen in relatively small adjuvant studies.

### Figure 28 Skeletal and Nonskeletal Metastasis-Free Survival of the Finnish Study(132)

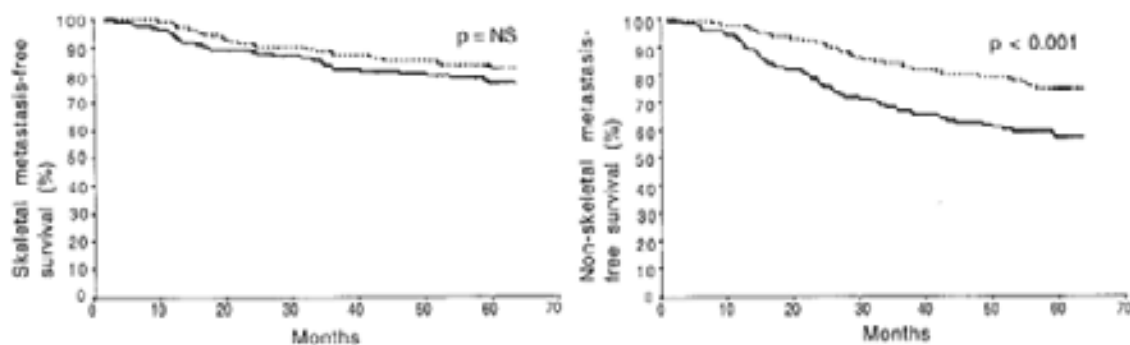

Fig 1. Five-year skeletal and nonskeletal metastasis-free survival in the clodronate (—) and control (---) groups.

Identifying a definite adjuvant role for bisphosphonates will require further large randomised studies. The National Surgical Adjuvant Breast Project (NSABP) have recently started a 3000+ patient placebo-controlled trial of oral clodronate in an attempt to resolve the value or otherwise of adjuvant clodronate, while this study will complement the results of the NSABP and the German GAIN-Study in terms of duration of bisphosphonate treatment.

Zoledronic acid is a new bisphosphonate developed for use in treating bone complications associated with a variety of primary cancers. A consistent positive effect across several skeletal-related endpoints was demonstrated for zoledronic acid. The reduction of skeletal morbidity was independent of tumor type and radiographic appearance of the metastases.(134-136) Zoledronic acid was also superior to pamidronate, the previous standard of care, in breast cancer patients with bone metastases. Among patients who had breast carcinoma with at least 1



osteolytic lesion (n = 528 patients), the proportion with an SRE was lower in the 4-mg Zoledronate group compared with the Pamidronate group (48% vs. 58%), but this did not reach statistical significance (P = 0.058). The time to first SRE was significantly longer in the 4-mg Zoledronate group (median, 310 vs. 174 days; P = 0.013). Moreover, multiple-event analysis demonstrated significant further reductions in the risk of developing SREs (30% in the osteolytic subset [P = 0.010] and 20% for all patients with breast cancer [P = 0.037]).(137)

It is hoped that the added potency of zoledronic acid may have beneficial effects, not only through the inhibition of bone resorption and reduction in growth factors and cytokines in the bone marrow microenvironment that appear to promote the development of a metastasis, but also through direct effects on tumor cells in the bone marrow. There is increasing evidence from a range of cell line experiments that zoledronic acid can inhibit tumor cell adhesion and invasion,(138) and promote apoptosis.(139) These effects are mediated through the mevalonate pathway using the same molecular pathway that aminobisphosphonates exploit to inhibit osteoclast function. In addition there are experimental data from animal models that indicate that zoledronic acid can suppress angiogenesis.

The other important issue in favour of the treatment with bisphosphonates in the adjuvant setting of breast cancer is the preservation of bone health. There are now increasing numbers of long-term survivors from breast cancer who have received combination chemotherapy, radiotherapy and hormonal cancer treatment. Many of these individuals are at increased risk of osteoporosis, largely because of the endocrine changes induced by treatment. There may also be clinically relevant, direct effects of cytotoxic drugs on bone. This is a particularly important long-term problem in women with breast cancer for whom there are concerns about the safety of hormone replacement therapy.

Osteoporosis is frequent in breast cancer patients. The occurrence of vertebral collapse with fracture is a common clinical marker of osteoporosis, and in one study(140) the annual incidence of vertebral fracture was nearly five times higher among women with breast cancer in the years after diagnosis, compared with controls. Of note, 79% of the women in this study received tamoxifen, and most received chemotherapy as well. Women with soft tissue relapse of their breast cancer, but without known skeletal metastases, had an even higher annual incidence of vertebral fracture. As the prevalence of breast cancer increases and women survive longer after treatment for breast cancer, osteoporosis is likely to become an even more important clinical problem. Bisphosphonates are the treatment of choice to prevent bone loss in breast cancer patients and adjuvant bisphosphonate treatment would be expected to improve skeletal health, and reduce the incidence and subsequent complications of osteoporosis.

In a recent report at the SABCS 2004 Meeting, Zoledronic Acid (4mg q6mo) can effectively counteract cancer treatment induced bone loss. The interim results of the ABCSG-12 trial were reported, which is a 4-arm trial comparing goserelin (3.6mg/q28days sc)/tamoxifen (20mg/d po) with goserelin/anastrozole (1mg/d po) with the two treatments plus zoledronic acid (4mg/q6m), respectively, for a total treatment duration of three years.(140;141) At the time of the analysis, 982 bone mineral density measurements were available from 382 patients (median age: 44.1 years (range 25-56)). In terms of patient and tumor characteristics, there was no



difference between the 192 patients treated with Zoledronic acid and the 190 not receiving the bisphosphonate. Combination endocrine treatment without Zoledronic acid frequently led to significant bone loss after 1 and 2 years of treatment (overall: minus 12% after 24 months, relative T-Score: -1.2). Bone loss was significantly more severe in patients receiving anastrozole/goserelin (mean -16%, relative T-Score: -1.6) as compared to patients receiving tamoxifen/goserelin (mean -8%, relative T-Score: -1.0). In both groups treated with zoledronic acid, bone mineral density remained stable, and no cancer treatment induced bone loss was noted ( $p < 0.0001$ ). There was no significant interaction of the observed effect with age or other risk factors.

In this study, the comparison between 2 years and 5 years of zoledronate treatment will be able to aim at two questions:

- The antitumoral effect of different durations of zoledronate treatment as defined by the primary and secondary endpoints of this study
- The osteoprotective efficacy of zoledronate as defined by the effect of zoledronate on skeletal events under the treatment with anastrozole.

**Figure 29 Development of Bone Mineral Density in Patients with and without Zoledronic Acid in the ABCSG-12 Trial**

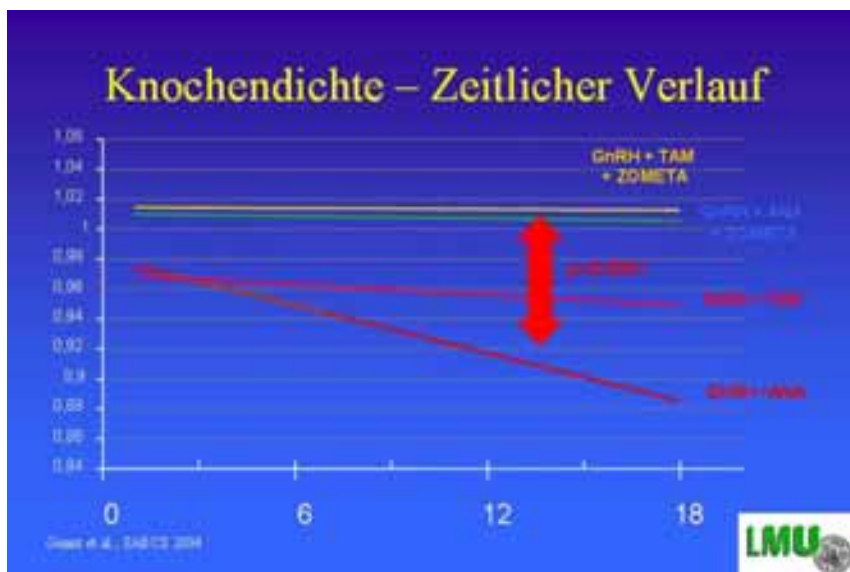

## 2.8 Radiotherapy

Halsted's demand for radical mastectomy as treatment of choice for breast cancer dates back to the 1880's and was based on the understanding of breast cancer as a locoregional disease. This view was questioned by a series of studies between 1950 and 1970.(9) These studies established the advantages of limited local therapy and finally led the way to breast conserving surgery.(142)

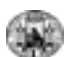



Adjuvant radiotherapy is undoubtedly an integral part of the concept of breast conserving surgery. Several randomized trials comparing conservative surgery alone with conservative surgery plus radiotherapy have demonstrated an average reduction in the risk of disease recurrence in the breast of 84% with the use of radiotherapy. At present, a group of patients who do not require radiotherapy has not been reproducibly identified, and radiotherapy should remain a part of breast-conserving therapy for invasive carcinoma.(143;144)

Until the late 1970's, post mastectomy radiotherapy was routinely administered. In the face of increased risk of local recurrence in patients who received no adjuvant radiotherapy, it was assumed that optimal tumor control could be achieved by routine postoperative radiotherapy. The expanding knowledge about early systemic dissemination of tumor cells and its predominant role in overall prognosis of the disease changed this policy in the early 1980's.(145) It has now been widely accepted for many years that postoperative radiotherapy of the chest wall after mastectomy should be restricted to cases with advanced stages of disease and/or with extensive lymphangiosis carcinomatosa and positive margins of resection.(146;147) However, more recent studies have shown that the increased risk for local recurrence, which is associated with a more selective use of chest wall irradiation, might also lead to a reduced overall survival.(148)

Beginning in the 1970's, however, data were published showing that the increased incidence of local recurrence is not necessarily associated with a less favorable overall survival rate.(149;150) In 1986, the results of two large, international, randomized, controlled trials (Stockholm Study(151) and Oslo Study(152)) provided a more definite and detailed understanding that, while post mastectomy irradiation might improve overall survival in advanced disease (> pT2 tumors), it did not do so in early, locally limited breast cancer.(153) This was also confirmed in 1987 by Griem et al. in patients undergoing chemotherapy. In their study, 510 patients, with T1-T3 tumors and positive nodes or tumors larger than 5 cm and negative nodes, were treated with mastectomy and chemotherapy. Patients were then randomized to receive either no further treatment or adjuvant radiotherapy. The rate of local recurrence in patients with chemotherapy alone was 14 % compared to 5 % in those who received both chemotherapy and radiotherapy. However, no significant difference was seen in the overall survival rate.(154;155)

Adjuvant radiotherapy of the chest wall following mastectomy reduces the risk of local recurrence in breast cancer of all stages. While this decrease may have no impact on the overall survival rate in early breast cancer(156), there is an increasing consensus that patients with advanced disease benefit from adjuvant radiotherapy both in terms of local control and overall survival.(157) We therefore require all patients in our study with breast conserving therapy or more than 3 axillary lymph node metastases or in the following cases after mastectomy:

- T3/T4-carcinoma
- T2-carcinoma > 3 cm
- multicentric tumor growth
- lymphangiosis carcinomatosa or vessel involvement
- involvement of the pectoralis fascia or a safety margin < 5 mm



- R1- or R2 resection.(4)

### **3 Adjunct Scientific Program of this Study**

In future, clinical studies should not only answer questions about the therapeutic efficacy of certain therapy regimes, but should also enhance the understanding of tumor biology. Clinical studies can serve as a perfect basis for tumorbiological analyses, because statistics and documentation in these studies are usually optimised.

We designed an ambitious adjunct scientific program for the SUCCESS-Study, which includes some of the most promising novel prognostic and predictive parameters. All study centers will gather peripheral blood samples at defined points of treatment for further translational research. In the subsequent sections of this protocol, we explain the current state of research in these areas of science and define the logistic basis for the adjunct scientific program.

#### **3.1 Disseminated Tumor Cells in the Bone Marrow**

In solid tumors, most patients will not die from their primary tumor, but from distant metastases which may develop even years after treatment of the primary tumor. In breast cancer, for example, about one-third of axillary node-negative patients will develop local or distant metastases during the further course of their disease, even if there was no evidence of tumor spread beyond the breast at the time of primary diagnosis (158;159). Metastases are probably caused by occult hematogenous spreading of tumor cells early during the disease. Several studies support the hypothesis that isolated tumor cells (ITC), i.e. MRD, in bone marrow of cancer patients can be regarded as precursors of clinically manifest distant metastases (160-167). Thus, early detection of minimal residual disease (MRD) in bone marrow has the potential of more accurate risk stratification for subsequent therapy decisions or even tailoring additional conventional or targeted therapies in order to eradicate these cells before they become overt metastases.

In general, new markers, such as MRD bone marrow, may serve as prognostic factors indicating the further course of the disease, or as predictive factors with regard to expected therapy response. Moreover, new markers themselves may serve as targets for new tumor-biological therapies. However, before new markers can be implemented in everyday patient management, they need to fulfill certain quality criteria regarding determination methodology and demonstrate clinical relevance (168): Next to a plausible biological rationale for using the particular marker, its determination method needs to be robust, standardized, and quality assured. Its clinical impact needs to be validated by independent clinical studies; and, finally, the marker must be clinically useful, i.e. it must be able to support clinical decision making independently of existing markers. According to Hayes and coworkers (169), new markers obtain the highest level of evidence (LOE I) by validation in a prospective clinical trial or a meta-analysis.

The majority of the studies demonstrating a correlation between MRD and patient



prognosis have used immunocytochemical detection methods (161-165;170-188). Using this approach, the presence of extrinsic epithelial cells in the mesenchymal bone marrow compartment can be demonstrated (Figure 30). Normal, non-dysplastic epithelial cells are not capable of migrating outside their original host organ, except in chronic inflammation after epithelial-mesenchymal transition (189). Thus, the presence of extrinsic epithelial cells in bone marrow indicates the malignant nature of these cells (190;191). However, methodological differences in ITC detection using either immunocytochemistry or molecular pathology methods have led to controversial interpretations regarding the clinical relevance of the respective results (192).

Several studies have shown that ITC detection using monoclonal antibodies is a clinically feasible method (162;165;182). However, caution needs to be exercised with regard to choice of markers and antibodies. Some antigens, such as epithelial membrane antigen (EMA) or mucin 1(MUC-1), are co-expressed by hematopoietic precursor cells such as erythroblasts. Current data suggest that antibodies directed against these polymorph epithelial mucins (PEM) label 2-10% of mesenchymal mononucleated cells of healthy volunteers (193). Many studies have therefore used monoclonal antibodies against cytokeratins (CKs), which are major constituents of the epithelial cytoskeleton. These proteins are regularly and abundantly expressed by epithelial cells and their malignant descendents. Anti-CK antibodies have been shown to yield a higher degree of specificity than antibodies directed against PEMs (160;185;187). While illegitimate CK messenger RNA expression by hematopoietic cells may potentially take place,(194-198) this problem is not relevant for immunocytochemical methods, since CK antigens are only very rarely detected in these cells (176;185;199;200). Consequently, false positive control aspirates may be explained by spurious staining of plasmacytoid cells(189) or may reflect the presence of a yet undiagnosed malignancy (187) Further justification for the use of CK as an ITC marker is presented by studies of Klein et al (201;202) and Müller et al. (203), who identified nuclear characteristics of CK positive cells by genetic analysis that are commonly found in breast carcinoma cells. Finally, a combination of several antibodies directed against various CK antigens may be used to account for the antigenic heterogeneity of tumor cells (179;200).

A reliable, quantitative detection assay was established (204) according to the proposal of Borgen et al. for a standardized immunocytochemical protocol to be used as a gold standard (205). This assay which is known for reproducible sensitivity and specificity (176), uses the monoclonal anti-CK antibody A45-B/B3 (206), which detects an epitope present on several cytokeratin polypeptides. At least  $2 \times 10^6$  cells per patient need to be screened in order to render satisfactory sensitivity. Screening can be performed either manually by bright-field microscopy or automatically by an image-analysis scanning system. The latter method may contribute to an improved read-out by avoiding cumbersome and fatiguing manual analysis (207;208). Previous methodical studies using surrogate model systems (e.g. cell line tumor cells spiked into bone marrow specimens) demonstrated a 95% chance for immunocytochemical detection of a single cancer cell in  $2 \times 10^6$  bone marrow cells (209). However, the relevance of such studies may be questionable, since it remains unclear how homogeneous tumor cell lines reflect the heterogeneity within patient bone marrow samples. This heterogeneity is a variable that may considerably influence the actual assay sensitivity. Enrichment methods are now available to improve sensitivity and



reproducibility of the detection assays. Clinical evaluation of these enrichment methods, however, is still warranted (183;210-214).

### **Figure 30 Single Disseminated Tumor cells in Bone Marrow detected using mAb A45-B/B3**

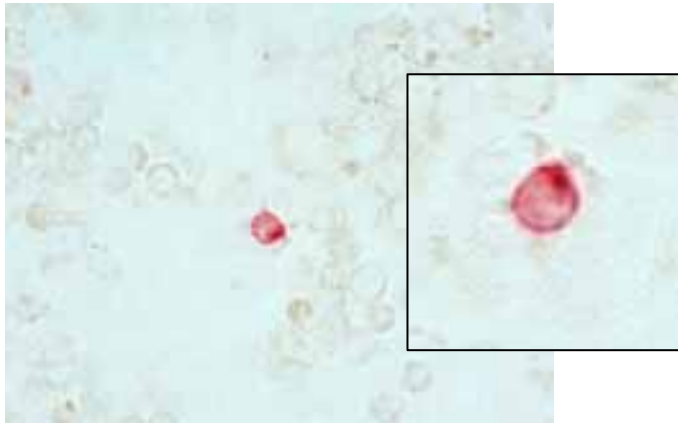

In addition to immunocytochemical methods, molecular approaches have been used to detect ITC. These methods mainly use a polymerase chain reaction (PCR)-mediated amplification of tumor cell DNA or of cDNA generated by reverse transcription of mRNA (RT-PCR) (215-219). However, so far, the specificity of RNA-based markers has remained a critical issue due to low-level illegitimate expression of relevant markers in surrounding non-malignant cells and the fact that distinction between viable and nonviable cells is impossible (220). With quantitative RT-PCR techniques that enable an estimate of the number of reference gene transcripts in bone marrow samples in relation to the marker gene (e.g. CK 19), a cut-off level can be created to distinguish between malignant and non-malignant cells (221;222). Flow cytometry has been established for MRD detection in lymphoma and leukemia (223;224). However, whether this method bears any advantage over immunocytochemistry for MRD detection in patients with epithelial tumors remains to be shown. In particular, the low number of ITC present in bone marrow aspirates of early stage breast cancer patients may severely hamper the flow cytometric approach. The results of studies published so far comparing flow cytometry and immunocytochemistry show rather divergent results, depending on the specific detection method used (225-228). The clinical relevance of flow cytometry for MRD detection in epithelial tumors still remains to be demonstrated and may require the additional use of efficient and reproducible tumor cell enrichment procedures. In breast cancer, histopathological methods showed a very low ITC detection rate in conventional bone marrow biopsies (229). Thus, this technique was criticized as an inadequate diagnostic tool due to its limited sensitivity. Therefore, immunocytochemical procedures have been used by most research groups, with some more recent studies also publishing RT-PCR results (Table 10). The majority of discrepant results can be attributed to substantial methodological discrepancies between the trials. In particular, differences in sensitivity and specificity of the applied techniques and antibodies, as well as the number of analyzed bone marrow cells, methods of specimen collection, preparation and the use of enrichment techniques



may influence detection rates and prognostic relevance. While older studies investigating bone marrow biopsies show isolated tumor cells in 1% to 17 % of patients, detection rates in aspiration specimens are considerably higher. Using immunocytochemical techniques based on monoclonal antibodies directed against epithelial cell antigens, the incidence of ITC in patients without overt metastases lies between 13 % and 43 %. In comparison to immunocytochemical techniques, some more recent publications have shown a higher incidence of cytokeratin-positive cells by reverse transcriptase polymerase chain reaction (RT-PCR), ranging from 26 % to 71 %. However, sufficient methodological validation has so far only been provided for immunocytochemical detection methods, using cytokeratin antibodies (230;231) with a false-positive rate as low as 1 % (160).

As the presence of ITC in bone marrow only partially correlates with established prognostic factors at time of primary diagnosis, it could serve as a parameter providing prognostic information independent of conventional clinical and pathological criteria. While most studies substantiate a prognostic relevance of ITC at primary diagnosis (130;161;163-167;187;188;232-235), some authors were not able to find an association between bone marrow status and recurrence-free or overall survival (172;221;226;236-241). However, most trials lacking a significant correlation to survival were early publications, investigating bone marrow biopsies using glycolipid or mucin antibodies. Moreover, patient numbers in these studies were rather small (190). An early meta-analysis comprising 2494 patients from 20 studies was not able to confirm bone marrow status as an independent predictor of recurrence-free and overall survival (242). Even though this meta-analysis included a substantial number of patients, it comprised individual studies with rather divergent detection methods, thus making comparison of the studies extremely difficult. In more recent studies, comprising substantial patient numbers and sufficient follow-up, an increasing prognostic relevance of ITC in the bone marrow has been established. Using an anti-EMA antibody, Mansi et al. found a significant prognostic influence of bone marrow status at time of primary diagnosis on later manifestation of distant metastases and on overall survival after median follow-up of 12.5 years. However, in contrast to tumor size and nodal status ITC were not confirmed as an independent prognostic factor in multivariate analysis (167). In a large patient cohort of 727 patients, Diel et al., found a correlation of bone marrow status with distant disease-free (DFS) and overall survival (OS) after median follow-up of 36 months. The independent prognostic impact of ITC on survival was even superior to that of lymph node status, tumor stage, and grade (162). Furthermore, all four recent prospective trials, comprising a total of 2316 patients, confirmed in multivariate analysis that the presence of cytokeratin-positive cells in the bone marrow predicts poor prognosis independently of conventional prognostic factors (160;163;164;188).

**Table 8 Prognostic relevance of isolated tumor cells in the bone marrow of breast cancer patients at primary diagnosis**

| Publication         | Number of Patients | Detection Rate (%) | Marker | Material | Technique | Prognostic Relevance |
|---------------------|--------------------|--------------------|--------|----------|-----------|----------------------|
| Coombes et al.(243) | 269                | 23                 | E29    | aspirate | ICC       | DFS                  |



|                          |      |    |                                        |          |        |           |
|--------------------------|------|----|----------------------------------------|----------|--------|-----------|
| Schlimok et al (187)     | 155  | 18 | CK18                                   | aspirate | ICC    | DDFS      |
| Porro et al (237)        | 159  | 16 | Mbr1                                   | biopsy   | ICC    | -         |
| Kirk et al.(244)         | 25   | 48 | LICR.LON.M8.4                          | aspirate | ICC    | -         |
| Salvadori et al (238)    | 121  | 17 | Mbr1                                   | biopsy   | ICC    | -         |
| Mathieu et al(240),      | 93   | 1  | KL1                                    | biopsy   | ICC    | -         |
| Courtemanche et al (236) | 50   | 8  | LICR.LON.M8.4                          | biopsy   | ICC    | -         |
| Dearnaley et al.(245)    | 37   | 33 | EMA                                    | aspirate | ICC    | DFS, OS   |
| Singletary et al (241)   | 71   | 38 | AE-1, AE-3, MAK 6, 113F1, 260F9, 317G5 | aspirate | ICC    | -         |
| Cote et al (161)         | 49   | 37 | T16, C26, AE-1                         | aspirate | ICC    | DFS, OS   |
| Harbeck et al (165)      | 100  | 38 | E29, Moll, 12H12                       | aspirate | ICC    | DFS, OS*  |
| Diel et al (162)         | 727  | 43 | 2E11                                   | aspirate | ICC    | DFS, OS*  |
| Funke et al (172)        | 234  | 38 | CK18                                   | aspirate | ICC    | n.d.      |
| Molino et al (226)       | 109  | 38 | Mbr1/8                                 | aspirate | ICC    | -         |
| Landys et al (166)       | 128  | 19 | AE-1, AE-3                             | biopsy   | ICC    | DFS, OS*  |
| Untch et al(246)         | 581  | 28 | CK18                                   | aspirate | ICC    | -         |
| Mansi et al (167)        | 350  | 25 | E29                                    | aspirate | ICC    | DFS, OS   |
| Braun et al (160)        | 552  | 36 | A45-B/B3                               | aspirate | ICC    | DDFS, OS* |
| Gerber et al (164)       | 554  | 31 | CK8, 18, 19                            | aspirate | ICC    | DFS, OS*  |
| Gebauer et al (163)      | 393  | 42 | CK/EMA                                 | aspirate | ICC    | DFS*, OS  |
| Datta et al (234)        | 34   | 26 | CK19                                   | aspirate | RT-PCR | DFS       |
| Fields et al (233)       | 83   | 71 | CK19                                   | aspirate | RT-PCR | DFS       |
| Vannucchi et al (235)    | 33   | 48 | CK19                                   | biopsy   | RT-PCR | DFS       |
| Slade et al (221)        | 23   | 61 | CK19                                   | aspirate | RT-PCR | -         |
| Wiedswang et al (188)    | 817  | 13 | AE-1, AE-3                             | aspirate | ICC    | DDFS, OS* |
| Braun et al (232)        | 4199 | 30 | A45-B/B3                               | aspirate | ICC    | OS*       |

**Abbreviations:** CK, cytokeratin; DFS, significant correlation between positive bone marrow status and disease-free survival; DDFS, significant correlation between positive bone marrow status and distant disease-free survival; ICC, immunocytochemistry; OS, significant correlation between positive bone marrow status and overall survival; RT-PCR, reverse-transcriptase polymerase chain reaction; n.d., not done.

\* prognostic relevance in multivariate analysis



A recently published pooled analysis by the 'Collaborative Group Bone Marrow Micrometastasis' analyzed data of 4199 patients from eight European centers (232). All patients were free of distant metastases at time of primary surgery; 90 % of the patients had pT1 and pT2 tumors; 58 % were node-negative; and 70 % had received adjuvant therapy. The overall detection rate of ITC in bone marrow was 30 % (n=1,277). After a median follow-up of 58 months, patients with ITC at primary diagnosis had a significantly reduced DFS (HR 2.10; 95%CI, 1.86-2.38; P<0.001) and OS (HR 2.28; 95%CI, 1.97-2.63; P<0.001) in univariate analysis. The reduced prognosis of bone marrow positive patients was not attributable to adjuvant therapy, since subgroup analysis also revealed decreased overall survival in node-negative patients without adjuvant systemic therapy (HR 1.87; CI 1.32-2.65; P<0.001). In multivariate analysis, next to tumor size, lymph node status, histopathological grading and negative hormone receptor status, MRD remained a significant risk factor for reduced overall survival in all patients (HR 1.83; CI 1.55-2.15; P<0.001).

Current strategies for detection and characterization of ITC in bone marrow of breast cancer patients could allow improved tumor staging, therapeutic targeting, and - for the first time – the possibility of monitoring the efficacy of adjuvant therapy. One of the intriguing opportunities for this marker might be monitoring of therapeutic efficacy in the adjuvant setting in absence of measurable disease by conventional means. In a pilot study, patients with high-risk breast cancer (>3 involved axillary lymph nodes or extensive invasion of cutaneous lymph vessels) and receiving standard taxane or anthracycline containing chemotherapy were monitored by bone marrow analysis before and after adjuvant chemotherapy (178). The overall prevalence of positive bone marrow findings before and after chemotherapy remained essentially unchanged. In addition, the presence of tumor cells after therapy was associated with an extremely poor prognosis and pointed to a heterogeneous response to treatment. In the high-dose chemotherapy setting, two pilot studies in breast cancer patients receiving either ifosfamide-carboplatin-epirubicin (n=18) or vinblastin-ifosfamide-carboplatin (n=10) chemotherapy with autologous stem cell transplantation showed ITC in 15 (83%) or in 3 (30%) bone marrow specimens obtained after completion of treatment, even though the majority of patients were in complete clinical remission (247). These findings support the discrepancy between clinical diagnosis and the immanent risk of relapse represented by MRD. This observation may serve as an explanation for treatment failure of high-dose chemotherapy. The persistence of ITC even after aggressive conventional systemic therapy shows the need for complementary strategies with proven efficacy and improved specificity for tumor cells, such as cell-cycle independent therapy.

Two more recent studies have examined the prognostic relevance of persistent ITC in bone marrow of early breast cancer patients without evidence of recurrence (248-250). In one study, bone marrow aspirates of 228 patients were analyzed during the recurrence-free follow-up at a median interval of 21.3 months after primary diagnosis of breast cancer stage pT1-2pN0-3pM0 (248). The results, both by univariate and multivariate analysis, demonstrated that MRD is not only detectable for a long period of time, but that its persistence also predicts a significantly increased risk for relapse and cancer-associated death. Patients without evidence of persistent ITC had a significantly longer overall survival (162.1 months) than patients with positive bone marrow status (98.7 months, p=.0008). In multivariate Cox regression analysis,



adjusting for initial bone marrow status, tumor size, nodal status, and histopathological grade, persistent ITC were an independent significant predictor for reduced DFS (RR4.57,  $p < .0001$ ) and overall survival (RR5.57,  $p = .002$ ).

In a second trial, Naume et al. confirmed the prognostic relevance of persistent ITC at three years after primary diagnosis ( $n = 356$ ) (250). In this analysis, persistent MRD was found in 15% of patients. After median follow-up of 66 months, the presence of persisting ITC was a strong independent prognostic factor for both DFS and OS. In multivariate analysis, adjusting for initial bone marrow status, axillary lymph node status, tumor size, HER-2/neu over-expression, and vascular invasion, ITC presence at follow-up bone marrow aspiration was associated with a relative risk of 7.5 ( $p = .007$ ) for breast cancer related death.

In addition to therapy monitoring, ITC may be valuable therapy targets. Since these cells frequently remain non-proliferative or dormant (251;252), cell-cycle-independent, antibody-based therapy appears to be a promising therapeutic option. In a pilot study by Braun et al. (177), a single dose of 500 mg edrecolomab was administered to 10 advanced breast cancer patients. Edrecolomab is directed against the epithelial cell adhesion molecule EpCAM, which is widely expressed on breast cancer cells. A marked reduction of the pre-therapeutic tumor cell load in all patients was seen at a second follow-up BM aspiration within 5-7 days after antibody treatment. In 4 of the 10 patients, no cytokeratin-positive/EpCAM-positive metastatic cells were present after treatment with edrecolomab. Since edrecolomab exhibits a marked antibody dependent cellular cytotoxicity and complement-dependent cytotoxicity in ex vivo experiments with serum of treated patients, it is very likely that the observed disappearance of tumor cells from bone marrow was caused by the administered antibody. No immediate alteration of the clinical course of the disease was observed - a fact that is not surprising considering the advanced stage of the study patients. Presumably due to the overwhelming tumor burden, monoclonal antibody therapy has been disappointing for patients in advanced stage cancer (253). This may in part be due to physiological barriers that prevent antibodies from penetrating the tumor mass (254).

However, in the adjuvant setting, antibody based therapy has been shown to be effective. Among the first studies to test this therapeutic rationale, the pivotal trial of edrecolomab versus placebo in Dukes C colorectal cancer patients demonstrated that a clinical benefit is achievable in the adjuvant setting (219). Patients were treated with 5 sequential doses of edrecolomab directed against EpCAM, which is almost homogeneously expressed in colorectal cancer. In the 7-year follow-up update (255), the edrecolomab-treated group experienced a 30% reduction in mortality and distant metastases compared to the untreated control group. These data also suggest that targeted therapies guided by ITC phenotyping may be among the most promising treatment options in the future. Different techniques, comprising immunofluorescence double staining, fluorescence in situ hybridization and many others, have been developed to visualize the antigenic profile of ITC. In cases with distinct molecular targets, specific antibody based therapies, such as trastuzumab (123), may be most effective. Furthermore, looking at the possibility of extended adjuvant endocrine treatment (256), detection of persistent ITC and subsequent hormone receptor analysis could be beneficial. Finally, protein target independent agents, such as bisphosphonates, have demonstrated therapeutic efficacy in patients with evidence of MRD in the bone marrow (130;257).





## 3.2 Disseminated Tumor Cells in Peripheral Blood

While data on disseminated tumor cells in the bone marrow shows good sensitivity and prognostic value of these cells in all stages of the disease, the bone marrow aspiration is an invasive procedure and not in widespread use among clinicians. In contrast, peripheral blood would be an ideal source for the detection of tumor cells due to its` easy sampling procedure and accessibility at any time of the disease. However, few data has been published on the detection and prognostic relevance of disseminated tumor cells in peripheral blood so far.

The detection of circulating tumour cells dates back to the 19<sup>th</sup> century, when Sanson and Ashwort described the occurrence of “cells similar to those in the tumours” in peripheral blood of cancer patients.(258;259) In the 1950s and 1960s many reports on the cytomorphological detection of disseminated tumour cells in peripheral blood were published.(260;261) Yet, because of the low specificity of mere cytomorphological methods with false-positive rates as high as 96%, the detection of circulating tumour cells was thought to be not feasible.

About twenty years later, newly developed immunocytochemical techniques offered a sensitive approach to the detection of haematogenously disseminated tumour cells, now called “minimal residual disease” (MRD). Several techniques were applied to different tumour entities, like neuroblastoma, lung and breast cancer.(262-264) Since the 1980s, molecular procedures such as polymerase chain reaction (PCR) and reverse transcriptase PCR (RT-PCR) have been used for the detection of disseminated tumour cells in several malignomas.(265;266) With these highly sensitive methods even very small numbers of circulating tumour cells can be detected in peripheral blood.

The dissemination of tumour cells to the blood is frequent after vascular invasion of the primary tumour and increases the risk for haematogenous metastases.(267) However, the prognostic relevance of circulating tumour cells in the peripheral blood of breast cancer patients remains to be demonstrated.(268;269)

### 3.2.1 Enrichment Techniques

Approaches to isolate tumour cells from peripheral blood may increase both specificity and sensitivity of cancer cell detection and enhance the opportunity of further characterisation. Most approaches utilise the difference in antigen expression, mainly the presence of epithelial or cancer-associated antigens in the absence of haematopoietic antigens, while the divergent morphology of circulating tumour cells may also be exploited.

Frequently, the positive selection of circulating tumour cells in peripheral blood is achieved by immunomagnetic techniques using magnetic particles. These particles are coated with antibodies directed against cell adhesion molecules (e.g. EPCAM antibodies),(270) against epithelial cell surface antigens (e.g. BerEP4, 317G5, MOC31) or against cytoskeletal cytokeratin antigens (e.g. AE1, AE3 and A45-B/B3). An alternative approach is the negative selection by removing the majority of CD45-positive haematopoietic cells with the help of anti-CD45-coated magnetic particles.(271-275) Using the standardized CellSearch System based on an EPCAM



enrichment procedure, Allard et al. could achieve a recovery rate of above 85%.<sup>(270)</sup> Naume et al. showed comparable efficacy for negative and positive immunomagnetic techniques, respectively. Using antibodies directed against epithelial surface antigens, this study achieved recovery rates for tumour cells of 60% to 80% and an enrichment factor of 1000. In contrast to standard immunocytochemical techniques, the detection rate was increased 3 to 4 times.<sup>(273)</sup> These recovery rates are remarkably higher than those using anti-cytokeratin antibodies, which range from 30% to 60%.<sup>(276;277)</sup> Moreover, the intracellular location of cytokeratins requires permeabilization of the cells and therefore excludes the possibility of functional tests following separation.

Purification procedures based on the physical differences in density, size and aggregation of circulating tumour cells include density-gradient techniques and filtration processes. The isolation of the mononuclear cell fraction by Ficoll or Percoll gradients leads to an approximately 10fold enrichment of tumour cells with an overall tumour cell recovery rate of 80% and a volume reduction of 98%.<sup>(278;279;279)</sup> A recent study on 347 breast cancer patient described a filtration process, in which cells and cell aggregates larger than 20 µm in size were recovered, followed by RT-PCR. This method achieved a purity of more than 50% viable circulating tumour cells and a recovery rate of 38% compared to 25% after immunomagnetic enrichment.<sup>(280)</sup> A novel method designed to enrich tumour cells from peripheral blood via a porous barrier gradient centrifugation has been described previously.<sup>(281)</sup> In comparison to Ficoll enrichment, this technique results in a depletion of mononuclear cells facilitating subsequent detection techniques due to an higher tumour cell density. While the enrichment of tumour cells by the factor 300 was much higher with the porous barrier gradient centrifugation, recovery rates were equal for both techniques.<sup>(282)</sup>

In conclusion, immunomagnetic approaches can be highly effective. The well-known heterogeneity of antigen expression in tumour cells represents the most striking disadvantage of these enrichment techniques.<sup>(283)</sup> The efficacy reported for density-gradient techniques and filtration processes is lower, and tumour cells differing in their physical characteristics might be missed. However, centrifugation protocols might permit an easier and more practical approach than immunomagnetic tumour cell enrichment.

### **3.2.2 Immunocytochemical Detection (ICC)**

Immunocytochemical methods are most extensively used for the detection of isolated tumour cells in bone marrow and lymphatic tissue. However, because of the low frequency of circulating cells in peripheral blood, the detection of tumour cells is much more difficult in this type of specimen. Several studies, evaluating the use of immunocytochemical methods in this setting have reported incidences of circulating tumour cells in the peripheral blood in the range of 0.6 % to 100% (Table 8).<sup>(271;284-290)</sup> This immense discrepancy in the different trials might be attributed to differences in methodology of the staining protocols and to tumorbiological reasons. Most trials applied antibodies directed against cytoskeletal cytokeratin antigens. In addition, also antibodies against cell surface glycoproteins and MUC-1 were used, that are known to cross-react with haematopoietic precursor cells.<sup>(291-293)</sup> Thus, discrepancies between studies might be explained by diverging specificity and sensitivity of different antibodies, but also by differing enrichment methods and



number of mononuclear cells screened.

Furthermore, tumourbiological factors seem to influence the detection rate of circulating tumour cells. At primary diagnosis, Krag et al. demonstrated the clearance of circulating tumour cells during the first two weeks after surgery in 65% of patients with operable invasive breast cancer, using an antibody against cytokeratin 8/18.

Preoperatively, circulating tumour cells were detected in the blood of 95% of the patients, whereas after 14 days the positive rate had dropped to 30%.(271)

Continuous tumour cell shedding by the tumour itself(294)or during surgery(295;296)may also play a role. In metastatic disease, circulating tumour cells were found in 28% to 49% of the cases.(286;297) This corresponds with detection rates that have been described for patients with other solid tumour entities.(298;299) Additionally, the number of circulating cells in peripheral blood can be influenced by tumour cell mobilisation caused by chemotherapy or granulocyte colony-stimulating factors. Brugger et al. found that the incidence of positive results increased from 29% to 100% in the same patient group after chemotherapy with VP16, ifosfamide and cisplatin followed by subsequent stimulation with granulocyte colony-stimulating factor.(285) Another trial by Franklin et al. observed an incidence of 3.5% circulating tumour cells in peripheral blood in 181 high-risk breast cancer patients with stage II to IV disease and treatment with stem cell factor and/or granulocyte colony-stimulating factor, but only of 0,6% without this treatment.

More recent studies investigated the predictive value of circulating tumour cells in peripheral blood detected by immunocytochemistry.(286-288;297) In two trials, tumour cells in peripheral blood were not significantly associated with the first site of recurrence, the number of involved organs, tumour marker status, the performance status or disease-free and overall survival in Kaplan-Meyer analysis.(286) However, two more comprehensive trials on a larger number of patients reported more encouraging results. According to Smith et al., the persistence of circulating tumour cells accurately reflected the response to chemotherapy in 80 % of patients with locally advanced and metastatic breast cancer, whereas in progressive disease ICC was only in agreement in 53%.(288) In a trial by Cristofanilli et al. 177 metastatic breast cancer patients circulating tumour cells in peripheral blood were evaluated before they started a new treatment and followed-up in monthly intervals.(297)

Patients with more than 5 circulating tumour cells in peripheral blood either at baseline or during treatment had a significantly shorter progression-free and overall survival compared to patients with fewer than 5 circulating cells. This could be confirmed by multivariate analysis, where circulating tumour cells were the most significant predictor of progression-free and overall survival. Therefore, the detection of circulating tumour cells by ICC might be a valuable tool to monitor treatment.

Some very recent reports have been published determining the occurrence of tumour cells in peripheral blood in non-metastatic patients after using immunomagnetic enrichment techniques. Taubert et al. found CK-positive cells in 35% of patients after a negative immunomagnetic selection method depleting CD45+ cells (MACS).(300)

In this set of patients, the detection of CK positive cells in peripheral blood correlated significantly with the nodal status and the occurrence of metastases at primary tumor resection. Notably, all patients in this study were examined at primary diagnosis, and 67 patients (81%) were free of metastases. Using MACS and immunostaining for cytokeratin, Hu et al. reported a positivity rate of 39% and a correlation of tumour cells in blood with the clinical stage of the disease: the positivity in the enriched



fraction was 0% (0/4), 33.3% (8/24), 60% (3/5) and 100% (3/3) for tumors at stages I, II, III and IV, respectively ( $p < 0.05$ ). (301) With the assistance of a automated fluorescence microscope, Kraeft et al. detected CK-positive tumor cells in the blood of 35% of breast cancer patients. (302) After enrichment for EPCAM-positive cells, another trial reported an overall positivity rate of 28%, with 76% of metastatic patients, 8% of node-positive patients and none of the node-negative patients presenting with CK-positive cells in peripheral blood. (303) Two very recent trials using a combination of Ficoll and a filtration technique or Ficoll alone for the enrichment of tumour cells, found a significant correlation of CK-positive cells in blood with the stage of the disease. (304;305) Detection rates in the study by Kahn et al. were 21% in node-negative patients, 31% in node-positive patients and 45% in metastatic patients at the initial study visit and ranged from 39% to 71%, when repeated blood sampling was taken into account. Unfortunately, this study did not discriminate between different time points of blood sampling, as patients receiving chemotherapy were compared with untreated patients. In comparison, detection rates using Ficoll enrichment alone were fairly lower with 7.5% in stage I/II disease, 25% in stage III and 41% in stage IV. (305) A correlation with DFS could not be found. Another trial by Müller et al., however, included patients with primary breast cancer (stage M(0)) after surgery and before initiation of adjuvant chemotherapy. (306) Using a gradient centrifugation (OncoQuick) for cell enrichment followed by anti-cytokeratin antibody staining, circulating tumor cells were detected in 5 of 60 patients (8.3%); a positive correlation to the presence of disseminated tumor cells in bone marrow was observed ( $P = 0.030$ ,  $n = 53$ ). Performing repeated analysis in a subgroup of 25 M(1) patients, circulating tumor cells were found more frequently in patients with progressive disease than in patients with stable disease or remission (87.5% versus 43.8% of patients with circulating tumor cells, respectively;  $P = 0.047$ ). All these recent trials have demonstrated a good feasibility of tumour cell detection in peripheral blood with immunocytochemical techniques after enrichment techniques had been applied.

**Table 9** Immunocytochemical Detection of MRD in the Blood of Patients with Breast Cancer

| First Author, Year | No. of Patients | Prevalence of MRD (%) | Sensitivity / recovery rate (%) | Antibodies used                                | Enrichment     | Control Patients | Prognostic relevance, correlation with clinical parameters |
|--------------------|-----------------|-----------------------|---------------------------------|------------------------------------------------|----------------|------------------|------------------------------------------------------------|
| Brugger, 1994      | 46              | 29 %<br>100 (HDT)     | - $4 \times 10^{-5}$ %          | AE1*, AE3*, HEA125, APAAP                      | Ficoll/Hypaque | none             | nsp                                                        |
| Franklin, 1996     | 155             | 17 %<br>(HDT)         | $4 \times 10^{-6}$ %            | 260F9, 520C9, 317G5, BrE-3, APAAP, hematoxylin | Ficoll/Hypaque |                  | Stage                                                      |
| Franklin, 1999     | 181             | 0.6 %<br>3.5 (HDT)    | - $1.7 \times 10^{-6}$ %        | AE1*, AE3*, MUC-1; APAAP, hematoxylin          | Ficoll/Hypaque | none             | nsp                                                        |



|                     |     |             |                      |                             |                                                 |     |                                                                                                               |
|---------------------|-----|-------------|----------------------|-----------------------------|-------------------------------------------------|-----|---------------------------------------------------------------------------------------------------------------|
| Krag, 1999          | 21  | 30 % - 95 % | nsp                  | CK 8/18-Ab, AP, hematoxylin | Ficoll/Hypaque, epithelial mAb                  | 0 % | surgery <sup>‡</sup>                                                                                          |
| Smith, 2000         | 22  | 42 %        | nsp                  | A45-B/B3, APAAP             | Ficoll/Hypaque                                  | 0 % | nsp                                                                                                           |
| Kraeft, 2000        | 355 | 35%         | 10 <sup>-6</sup>     | CK, EPCAM                   | None                                            | 0%  | nsp                                                                                                           |
| Kruger, 2001        | 75  | 40 %        | nsp                  | KL1, A45-B/B3, APAAP        | Ficoll/Hypaque, red cell lysis, anti-HEA-125-Ab | nsp | OAS <sup>##</sup> , DFS <sup>##</sup>                                                                         |
| Mehes, 2001         | 19  | 42 %        | nsp                  | CK-Ab, MUC-1-Ab             | Lymphoprep                                      | 0 % | nsp                                                                                                           |
| Witzig, 2002        | 84  | 28%         | 86%                  | A45B/B3                     | Immunomagnetic HEA-125                          | 0%  | Nsp                                                                                                           |
| Cristofanilli, 2004 | 177 | 49%         | nsp                  | CK 8/18/19-Ab, CD45-Ab      | Immunomagnetic                                  | 0%  | OAS <sup>‡</sup> , PFS <sup>‡</sup>                                                                           |
| Hu, 2003            | 36  | 39%         | Nsp                  | CK                          | Immunomagnetic                                  | nsp | stage <sup>‡</sup>                                                                                            |
| Taubert, 2004       | 83  | 35%         | nsp                  | CK 8/18                     | Immunomagnetic CD45                             | nsp | N <sup>‡</sup> , M <sup>‡</sup> , T <sup>##</sup> , grade <sup>##</sup> , ER <sup>##</sup> , PR <sup>##</sup> |
| Kahn, 2004          | 131 | 39-71%      | 5 x 10 <sup>-7</sup> | CK8                         | Ficoll, filtration                              | 0%  | Stage <sup>‡</sup> , PR <sup>‡</sup> , T <sup>##</sup> , grade <sup>##</sup> , ER <sup>##</sup>               |
| Piergas, 2004       | 114 | 8-41%       | nsp                  | CK8/18/19                   | Ficoll                                          | nsp | Stage <sup>‡</sup> , DFS <sup>##</sup>                                                                        |
| Müller, 2005        | 85  | 8 vs. 40%   | nsp                  | CK8/18/19                   | OncoQuick                                       | nsp | Stage <sup>‡</sup> , tumor progression <sup>‡</sup>                                                           |

nsp: not specified  
 HDT: high dose chemotherapy  
 T: tumor size  
 N: nodal status  
 ER: estrogen receptor status  
 PR: progesteron receptor status  
 \* Anti-cytokeratin components  
 ‡ significant correlation (p<0.5)  
 ## nonsignificant correlation

### 3.2.3 Molecular Detection Procedures

In the last decade, molecular techniques, such as polymerase chain reaction (PCR) and reverse transcriptase PCR (RT-PCR) have been applied more frequently for the detection of circulating tumour cells in peripheral blood and bone marrow. This highly sensitive approach allows the detection of one malignant cell within at least a million of mononuclear cells.(307-309) Though, in contrast to most haematological malignancies, well-characterised, tumour-specific molecular markers are limited in breast cancer. The most frequently used markers include epithelial antigens, like CK18, CK19, CK20, MUC-1(234;310-313) and cancer cell specific antigens, e.g. CEA, telomerase, p53, c-erbB-2 and  $\beta$ -HCG or PSA.(314-318) Recently, mammaglobin and maspin have been identified as promising new markers, because their expression seems to be limited to mammarian epithelial cells and is frequent in

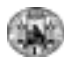

malignant mammary cells.(319-322) (Table 2)

Using molecular procedures, detection rates for circulating epithelial cells in peripheral blood range from 3% to 84%. This may be attributed to several differences in the assay protocols, to the varying specificity of the markers and to tumour characteristics of the examined patient groups, which makes a comparison of the studies difficult. In those studies, which used CK, CEA, mammaglobin and maspin as molecular markers, circulating cells were found in 8% to 46% of patients.(234;311-313;320;321;323-325) Higher rates were reported for c-erbB-2 (59%)(318), telomerase (84%)(316) and multimolecular marker assays (70%).(314;317) As the genomic heterogeneity between primary tumour and occult metastatic cells, as well as between the different cell lines of a single tumour is a well-known problem in the detection of MRD, this can explain the increased rate of circulating tumour cells, when multimolecular assays with a higher sensitivity are used.

However, specificity is a major concern in the detection of MRD by molecular techniques. Several of the commonly used markers, among them CK18, CK19, CK20, CEA, MUC-1 and c-erbB-2, are expressed in normal cells of peripheral blood, bone marrow and lymph nodes, leading to false positive results. Moreover, many of these molecular markers are also frequently expressed in normal epithelial cells and can also be amplified up to 39% of patients with benign breast disease or healthy donors.(326-328) Therefore, illegitimate transcription of tumour-associated or epithelial-specific genes in haematopoietic cells, presence of pseudogenes and deficient expression of marker genes in tumour cells are the limiting factors for the detection of circulating tumour cells by PCR.

The correlation of circulating tumour cells, as detected by PCR, and clinicopathological parameters, is being discussed controversially, probably due to the small numbers of patients and the short follow-up in most studies. Some studies reported a higher rate of MRD with increasing stage of disease.(311;313;329) This could be confirmed by Taback et al. and Zach et al., who showed a significant correlation between the detection of tumour cells in peripheral blood and tumour stage at first diagnosis and the course of the disease, respectively. Their findings are statistically significant in univariate and in multivariate analysis.(317;321) In another study by Grünwald et al., the expression of mammaglobin correlated with the nodal status and the occurrence of distant metastasis.(328) Uciechowski et al. found a significant correlation of genomic alterations of the DCC- and c-erbB-2-genes and recurrence-free survival. Additionally, the number of genomic imbalances in circulating tumour cells proved as an independent prognostic factor in multivariate analysis.(314)

Some more recent reports also indicate a prognostic relevance of disseminated tumour cells in peripheral blood. The first study to report a clinical significance of CK19 RT-PCR was published by Wong et al., where elevated CK19 levels correlated significantly with a decreased overall survival. CEA, in the contrary, was not able to distinguish breast cancer patients from healthy donors due to a very high positivity of 92% in the same patient cohort.(330) Weigelt et al. found a significantly worse progression-free and overall survival in 94 patients with metastatic disease with an incidence of 31% of circulating tumor cells detected by a multimarker assay in these patients.(331) Furthermore, there is also one trial confirming the prognostic relevance of circulating tumour cells in peripheral blood in the adjuvant setting. Stathopoulou et al. Investigated 148 patients with operable breast cancer before starting adjuvant



chemotherapy.(332) CK19-positive cells were detected in the peripheral blood in 30% of these early stage patients, while 52% of patients showed tumour cells after they had been diagnosed with metastases. Detection of peripheral-blood CK19-positive cells proved as independent prognostic factor for both disease-free and overall survival in multivariate analysis.

**Table 10** Molecular Detection of MRD in the Blood of Patients with Breast Cancer

| First Year         | Author, No. of Patients | Prevalence of MRD (%) | Sensitivity / recovery rate (%) | Target                                                                 | Enrichment                              | Control Patients           |
|--------------------|-------------------------|-----------------------|---------------------------------|------------------------------------------------------------------------|-----------------------------------------|----------------------------|
| Datta, 1994        | 34                      | 21 %                  | $10^{-6}$                       | K-19                                                                   | none                                    | 3 % (1)                    |
| Krüger, 1996       | 35                      | 46 % (37 % - 60 %)    | $10^{-6}$                       | CK-19                                                                  | Ficoll/Hypaque                          | 0 %                        |
| Schoenfeld, 1997   | 78                      | 25 %                  | $10^{-6}$                       | K19                                                                    | Lymphoprep                              | 0 %                        |
| Mori, 1998         | 62                      | 19 %                  | $10^{-6}$                       | CEA                                                                    | None                                    | 0 %                        |
| Slade, 1999        | 60                      | 38 % (13 % - 54 %)    | $10^{-6}$ - $10^{-7}$           | CK-19                                                                  | Ficoll/Hypaque                          | 0 %                        |
| Soria, 1999        | 25                      | 84 %                  | 1.2 EC/ml                       | Telomerase                                                             | Ficoll/Hypaque, BerEP4***               | 0 %                        |
| Wasserman, 1999    | 17                      | 59 %                  | $10^{-6}$                       | c-erbB-2                                                               | none                                    | 0 %                        |
| Zach, 1999         | 114                     | 25 %                  | $10^{-6}$ - $10^{-7}$           | Mammaglobin (U33147)                                                   | none                                    | 2 % (2)                    |
| De Cremoux, 2000   | 122                     | 24-45%                | 1 cell/5ml blood                | Muc1                                                                   | BerEP4***                               | 11%                        |
| De Luca, 2000      | 91                      | 59%                   | $10^{-5}$                       | EGFR                                                                   | None                                    | 11%                        |
| Grünewald, 2000    | 145                     | 8 %<br>10 %<br>48 %   | $10^{-6}$                       | Mammaglobin<br>EGF-R<br>CK-19                                          | none                                    | 0 %<br>0 %<br>39 %<br>(12) |
| Kahn, 2000         | 109                     | 30-71%                | $<10^{-6}$                      | CK19                                                                   | Ficoll                                  | 0%                         |
| Sabbatini, 2000    | 30                      | 3 % - 50 %            | $10^{-6}$                       | Maspin (U04313)                                                        | Ficoll/Hypaque                          | 0 %                        |
| Suchy, 2000        | 98                      | 11 %                  | Nsp                             | Mammaglobin                                                            | Nycoprep                                | 0 %                        |
| Uciechowski, 2000  | 353                     | 71 %                  | 54 % - 68 %                     | P53, RB-1, DCC, APC, c-erbB-2, c-myc, D9S126, D9S171, D16S496, D17S695 | Nycoprep, polyester mesh, anti-CD45 mAb | 0 %                        |
| Taback, 2001       | 65                      | 69 %                  | $1-5 \times 10^{-7}$            | $\beta$ -HCG, c-Met, MAGE-A3, GalNAc-T                                 | none                                    | 0 %                        |
| Wong, 2001         | 33                      | 72%                   | Nsp                             | CK19                                                                   |                                         | 19%                        |
| Silva, 2002        | 78                      | 24%                   | $10^{-8}$                       | Mammaglobin                                                            | none                                    | 0%                         |
| Stathopoulou, 2002 | 148                     | 30-52%                | $10^{-6}$                       | CK19                                                                   | Ficoll                                  | 3.7%                       |
| Schröder, 2003     | 58                      | 33%                   | $10^{-6}$                       | CK19, EGP2                                                             | none                                    | Nsp                        |



Weigelt, 2003 94 31% nsp CK19, p1B, nsp Nsp  
 PS2, EGP2  
 nsp: not specified, EC: epithelial cells, T: tumor size, N: nodal status, M:  
 metastatic status, ER: estrogen receptor expression, PR: progesterone receptor  
 expression, \*\*\* epithelial marker, ‡ significant correlation (p<0.5), †† nonsignificant  
 correlation

### 3.2.4 Flow cytometry

Flow cytometry has been proven to be a feasible and highly sensitive tool for the detection of circulating tumour cells in the peripheral blood of breast cancer patients. The reported sensitivity of this method can be as high as one tumour cell in  $10^7$  blood cells in the literature.(268;333) (Table 10)

Racila et al. developed a multiparameter flow cytometry after immunomagnetic tumour cell enrichment with an anti-EPCAM antibody. The cytometric detection is based on labelled anti-cytokeratin and CD45 mAb and, additionally, it accounts for staining, size and granularity of the cells. This study showed a highly significant difference in the number of circulating tumour cells found in breast cancer patients at the time of primary diagnosis, compared to healthy controls. The difference between the locoregionally restricted group and the patients with distant metastasis was significant as well. In the blood of healthy control individuals, the number of epithelial cells ranged from 0 to 5 (mean 1.5), whereas the average of cells found in patients with locoregionally restricted malignant disease was  $15.9 \pm 17.4$  ( $\pm$  SD),  $47.4 \pm 52.3$  ( $\pm$  SD) in patients with nodal involvement, and  $122 \pm 140$  ( $\pm$  SD) with distant metastases. Additionally, in this study, the number of circulating tumour cells reflected the clinically assessed activity of the disease.(274;334) 54% of healthy donors also showed circulating tumour cells in the blood in this study. These results were confirmed by Terstappen, who also investigated the relevance of flow cytometry for the detection of MRD during the follow-up of breast cancer patients. 37 patients underwent multiple examinations over one year between one and twenty years after surgery. In this study, 29% (9 of 31) of the patients without evidence of the disease and 50% (3 of 6) of the patients in complete remission after previous successful treatment of distant metastases had epithelial cells above the normal range. The number of epithelial cells detected in patients with metastatic disease was associated with the activity of the disease and frequently preceded the clinical course as to progression and remission. A positive response to chemotherapy was associated with a decrease in epithelial cells, labelled with anticytokeratin antibodies.(275) The detection of an increased number of epithelial cells in metastatic disease by flow-cytometry was confirmed by Beitsch et al.(335), but not by Mancuso, who found no significant difference between breast cancer patients with early and metastatic disease.(336) This discrepancy might be attributed to differences in the assay protocols: Mancuso used epithelial markers and activation markers for the selection of tumour cells instead of anti-cytokeratin antibodies, that were applied in all other studies. Activated tumour cells, i.e. cells positive for the activation markers CD105 and CD106, clearly decreased in number in patients evaluated before and 24 hours after quadrantectomy in the trial by Mancuso et al.. Most trials combined flow cytometry with subsequent immunocytochemistry to confirm the malignant character of the detected epithelial cells.(274;275;334;335)

In conclusion, flow cytometry represents a highly sensitive method to detect and





quantify circulating epithelial cells in peripheral blood, though the clinical relevance and prognostic significance of the detected cells still remains in dispute. However, further characterisation of the circulating tumour cells subsequent to the detection by flow cytometry requires labour-intensive cell sorting. For these reasons, flow cytometry currently cannot be regarded as a standard technique for the detection of MRD in solid tumours, but may offer promising aspects for the monitoring of MRD in future.

**Table 11** Detection of MRD in the Blood of Patients with Breast Cancer by Flow Cytometry

| First Author, Year | No. of Patients  | Prevalence of MRD (%) | Sensitivity / recovery rate (%) | Antibodies used                                                                                                                                          | Enrichment                  | Control Patients                          | Prognostic relevance, correlation with clinical parameters     |     |
|--------------------|------------------|-----------------------|---------------------------------|----------------------------------------------------------------------------------------------------------------------------------------------------------|-----------------------------|-------------------------------------------|----------------------------------------------------------------|-----|
| Gross, 1995        | BT-20-Cell model |                       | 10 <sup>-7</sup>                | NCL-5D3*, NCL-LP34*, CAM5.2*, AE1*, HLe1 <sup>†</sup> , gpIX <sup>††</sup> , HPCA-2 <sup>***</sup> , anti-CD61-Ab                                        | Ficoll/Hypaque              |                                           |                                                                |     |
| Racila, 1998       | 30               | 97 %                  | 75-100 %                        | CAM5.2,* CD45 mAb                                                                                                                                        | GA73.3 <sup>**</sup>        | 7+/13 (mean 1.5 EC)                       | PM <sup>†</sup>                                                |     |
| Engel, 1999        | 9                | 100 %                 | 5 x 10 <sup>-4</sup>            | CD45 Ab, CK-Ab                                                                                                                                           | Ficoll/Hypaque, anti-CK8-Ab | Nsp                                       | nsp                                                            |     |
| Terstappen, 2000   | 45               | 29 %                  | -80 %                           | Nsp                                                                                                                                                      | CAM5.2,* CD45 mAb           | GA73.3 <sup>**</sup> , MJ37 <sup>**</sup> | 32 (mean 1.5 EC)                                               | nsp |
| Beitsch, 2001      | 34               | 96 – 100 %            | Nsp                             | CK-Ab, CD45-Ab                                                                                                                                           | EPCAM-Ab                    | 23 (mean 1.7 EC)                          | stage <sup>†</sup>                                             |     |
| Mancuso, 2001      | 46               | 21.4 µL               | EC/ 0,1 EC/µL – 90 %            | WM59 <sup>***</sup> , HPCA-2 <sup>***</sup> , 2D1 <sup>†</sup> , 8E11 <sup>§</sup> , 5110C9 <sup>§</sup> , AC133/1 <sup>†††</sup> , P1H12 <sup>***</sup> | none                        | 20 (mean 9.1 EC/µL)                       | surgery <sup>†</sup> , stage <sup>††</sup> , age <sup>††</sup> |     |
| Zabaglo, 2003      | 20               | 100%                  | 1 EC/ml                         | CK 5,6,8,17                                                                                                                                              | filter                      | 33% (1EC)                                 | nsp                                                            |     |

nsp: not specified  
 EC: epithelial cells  
 \* Anti-cytokeratin components  
 \*\* Anti-EPCAM antibody  
 \*\*\* epithelial marker  
 † Anti-CD45-antibody  
 †† Anti-CD42a-antibody



|     |                                         |
|-----|-----------------------------------------|
| ††† | Anti-CD133-antibody (progenitor marker) |
| §   | activation marker                       |
| ‡   | significant correlation (p<0.5)         |
| ‡‡  | nonsignificant correlation              |

### 3.2.5 Clonogenic culture assays

The establishment of clonogenic culture assays leads to an increase of both the absolute and relative number of tumour cells by clonogenic growth of tumour cells and simultaneous apoptosis of haematopoietic cells. Both short-term approaches (1 to 2 weeks)(283;337;338) and long-term approaches of up to eight weeks (339) have been applied. Using these techniques, the sensitivity of detection methods like ICC and PCR following the enrichment of tumour cells could be increased.

Technical difficulties, however, have prevented widespread application of clonogenic culture assays. Despite the use of several different culture media, multiplication of tumour cells in the absence of non-malignant cell growth stays difficult.(337;338;340) Additionally, this approach is very time consuming and only applicable in combination with other detection methods. These disadvantages reduce its value in the clinical setting.

Regarding the prognostic significance, culture methods can be applied to measure the viability and clonogenic capacity of circulating tumour cells, and to evaluate the actual potency to survive and grow of pathogenetically relevant cell clones. Culture-positive patients have been reported to have a significantly worse outcome than patients that have been classified tumour cell-negative by culture methods.(339;341)

The use of clonogenic culture assays leads to an increased number of viable circulating tumour cells, which may be evaluated for diverse biological characteristics. Particularly chemosensitivity testing procedures and approaches to characterise phenotype and genotype of tumour cells may help to improve our understanding of tumour biology.

### 3.3 Comparison of the different techniques

As described above, mainly immunocytochemical techniques, but also molecular approaches, such as PCR and RT-PCR and flow cytometry have been used for the detection of MRD in peripheral blood. Different studies have reported detection rates for circulating tumour cells in the peripheral blood in the range of 0.6 % to 100%.(271;284;286-290) This immense range of incidence in the different trials is paralleled, and probably caused, by the diversity of detection methods.

However, most recent reports providing a reasonably low detection rate in healthy donors, result in a detection rate of 30% to 50% in patients with metastatic disease both with immunocytochemical (286;288;289;297;305) and molecular techniques.(312;313;320;321;323;325;331;332) With multimolecular assays, some authors tested about 70% of peripheral blood specimens tumour cell positive.(314;317) Few data exists in the adjuvant setting or during recurrence free follow-up indicating a lower incidence of circulating tumour cells of 7% to 39% in these patients.(275;304-306;313;332)

In conclusion, sensitivity and detection rates are increased in trials using flow cytometry and molecular techniques. On the other hand, only immunocytochemical detection methods include the morphological evaluation of the cells. Considering the clinical relevance of these findings, many questions are still unsolved. The number of circulating tumour cells seems to be influenced by tumorbiological factors, such as



timing of the examination and tumour stage. Several studies reported tumour cells in the blood of up to 100% of patients at primary diagnosis, whereas after the completion of the primary treatment the number of circulating cells dropped rapidly.(271) Furthermore, tumour cells are mobilised from the bone marrow by chemotherapy or application of granulocyte colony-stimulating factors.(285) In some studies, using ICC, PCR and flow cytometry, the detection rate and the number of circulating tumour cells correlated with the stage of disease.(274;275;284;320;335) Furthermore, some more recent data indicates a potential prognostic relevance of circulating tumour cells.(297;305;330;332)

In conclusion, the detection of tumour cells in the peripheral blood might be a convenient method with little invasivity to help clinicians estimate the risk for relapse and monitor treatment efficacy, which might lead to more individualised therapy concepts. However, further studies, particularly in the adjuvant setting, are needed to explore the prognostic and predictive relevance of circulating tumour cells in the peripheral blood of breast cancer patients.

### 3.4 Additional Therapy Monitoring in Peripheral Blood

It is generally accepted, that regular and careful follow-up for patients with breast cancer is part of overall cancer care. However, strategies for time intervals and diagnostic procedures are discussed controversially. At present, large scale data from prospective randomized trials or evidence-based criteria are missing for most procedures applied. As a consequence, a clinically orientated follow-up program is proposed. This program encompasses individualization of care with an informative, detailed and structured talk and a clinically directed exam. The detection of clinical signs and symptoms leads to further diagnostic procedures. Thus, follow-up care is divided into a general and a specific part. The latter summarizes organ-specific symptoms, frequencies and nature of exams, integrating early cancer detection for other cancer types.(342)

**Figure 31 Follow-up schedule according to the AGO**

| Untersuchung                     | 1. – 3. Jahr<br>Kontrollen<br>3-monatlich | 4. – 5. Jahr<br>Kontrollen<br>6-monatlich | 6. – 10. Jahr<br>Kontrollen<br>jährlich |
|----------------------------------|-------------------------------------------|-------------------------------------------|-----------------------------------------|
| Anamnese                         | bei jeder Kontrolle                       | bei jeder Kontrolle                       | bei jeder Kontrolle                     |
| Selbstuntersuchung               | monatlich                                 | monatlich                                 | monatlich                               |
| klinische Untersuchung der Mamma | bei jeder Kontrolle                       | bei jeder Kontrolle                       | jährlich                                |
| gynkologische Untersuchung       | jährlich                                  | jährlich                                  | jährlich                                |
| <b>Mammadiagnostik</b>           |                                           |                                           |                                         |
| – ipsilaterale Brust/Wand        | mindestens jährlich                       | jährlich                                  | jährlich                                |
| – kontralaterale Brust           | jährlich                                  | jährlich                                  | jährlich                                |
| Tumormarker                      | nicht in der Routine                      | nicht in der Routine                      | nicht in der Routine                    |
| sonstige Bildgebung              | bei klin. Verdacht                        | bei klin. Verdacht                        | bei klin. Verdacht                      |

Ab dem 10. Jahr regelmäßige Kontrollen im Rahmen des Krebsfrüherkennungsprogramms.

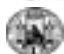

Correspondingly to the recommendations of the AGO (Arbeitsgemeinschaft Gynäkologische Onkologie), the latest update of the ASCO Breast Cancer Surveillance Guidelines focuses on a clinically oriented follow-up, containing careful history, physical examination and breast self-examination, mammography, pelvic examination, patient education regarding symptoms of recurrence and a good coordination of care.(343)

### *3.4.1 Recommended Breast Cancer Surveillance according to 1998 American Society of Clinical Oncology Breast Cancer Surveillance Guidelines Summary*

#### **History/Eliciting of Symptoms**

All women should have a careful history every 3 to 6 months for the first 3 years after primary therapy, then every 6 to 12 months for the next 2 years, and then annually.

#### **Physical Examination**

All women should have a careful physical examination every 3 to 6 months for the first 3 years, then every 6 to 12 months for the next 2 years, and then annually.

#### **Breast Self-Examination**

It is prudent to recommend that all women perform monthly breast self-examination.

#### **Mammography**

It is prudent to recommend that all women with a prior diagnosis of breast cancer have yearly mammographic evaluation. Women treated with breast-conserving therapy should have their first posttreatment mammogram 6 months after completion of radiotherapy, then annually or as indicated for surveillance of abnormalities. If stability of mammographic findings is achieved, mammography can be performed yearly thereafter.

#### **Patient Education Regarding Symptoms of Recurrence**

Since the majority of recurrences occur between scheduled visits, it is prudent to inform women about symptoms of recurrence.

#### **Coordination of Care**

The majority of breast cancer recurrences will have occurred within the first 5 years after primary therapy. Subsequent care of the patient following primary treatment should be coordinated and not duplicated. In addition, continuity of care should be encouraged and conducted by a physician experienced in the surveillance of cancer patients and in the examination of women with both irradiated and normal contralateral breasts.

#### **Pelvic Examination**

It is prudent to recommend that all women have a pelvic examination at regular intervals. Longer intervals may be appropriate for women who have had a total abdominal hysterectomy and oophorectomy.



### ***3.4.2 Breast Cancer Surveillance Testing – not recommended by ASCO***

#### ***Complete Blood Cell Count***

The data are insufficient to suggest the routine use of complete blood cell counts.

#### ***Automated Chemistry Studies***

The data are insufficient to suggest the routine use of automated chemistry studies. Automated chemistry studies include liver and renal function tests and protein, albumin, and calcium level studies.

#### ***Chest Roentgenography***

The data are insufficient to suggest the routine use of chest radiographs.

#### ***Bone Scan***

The data are insufficient to suggest the routine use of bone scans.

#### ***Ultrasound of the Liver***

The data are insufficient to suggest the routine use of liver ultrasounds.

#### ***Computed Tomography***

The data are insufficient to suggest the routine use of computed tomography.

#### ***Breast Cancer Tumor Marker CA 15-3***

The routine use of the CA 15-3 tumor marker for breast cancer surveillance is not recommended.

#### ***Breast Cancer Tumor Marker Carcinoembryonic Antigen (CEA)***

The routine use of the tumor marker CEA for breast cancer surveillance is not recommended.

#### ***Breast Cancer Tumor Marker Ca 27.29***

The routine use of the tumor marker Ca 27.29 for breast cancer surveillance is not recommended.

Due to insufficient data, none of these guidelines included the routine use of laboratory tests, e.g. blood cell counts, blood chemistry, and various tumor markers or a intensified follow-up with chest radiographies, bone scan, liver ultrasound or computed tomography. As sufficiently sized randomized studies are not available at the moment, these procedures can not be recommend for routine clinical use at present.

Multiple studies have shown a correlation of Ca 15-3 with the stage of disease.(344) The incidence of elevated MUC1 antibodies (Ca 15-3, Ca549, MCA) in the literature ranges from 5% to 30%, 15% to 50%, 60% to 70%, and 65% to 90% for breast cancer stages I, II, III, and IV, respectively.(345) In distant metastatic disease, elevated levels for CEA are reported in 64% of patients, for CA15-3 in 75% of patients and for CA27-29 in 81% of patients.(346) Corresponding the high rates of positivity for CA27-29, a recent report directly comparing CA 15-3 and CA27-29 in 603 breast cancer patients and 194 healthy controls suggested an increased



sensitivity of 55% for the latter marker, even in all population subgroups studied.(347) Additionally, an excellent correlation was found between the two markers.

Three studies have been published between 1995 to 1997, to report a earlier detection of distant metastases with a lead time of five to six months applying tumor marker surveillance.(348) One controlled, prospective clinical trial evaluated Ca 27.29 antigen, the MUC-1 gene product in serum, for its ability to predict relapse in stage II and stage III breast cancer patients.(348) 166 patients with early breast cancer (stage II and III) were serially tested for Ca 27.29 antigen levels during recurrence-free follow-up after completion of primary therapy. Patients with two consecutive Ca 27.29 antigen test results above the upper limit of normal were considered positive. This trial showed a sensitivity of 57.7% and a specificity of 97.9% for Ca 27.29, while the positive predictive value was 83.3%, and the negative predictive value 92.6%. Multivariate analysis revealed Ca 27.29 as a positive predictive value for subsequent disease recurrence, both for distant and locoregional disease. Ca 27.29 could predict recurrences an average of 5.3 months before other symptoms or tests. However, an impact on disease-free or overall survival could not be demonstrated. Another study evaluating CA15.3 in 362 node-negative patients confirmed this marker as a significant predictor of recurrence-free survival in multivariate analysis.(349)

However, the surveillance of breast cancer patients by tumor markers shows several pitfalls. Despite a reliable correlation with stage, low marker levels do not exclude metastatic disease, and there is a relevant false positive rate for all markers. The ASCO Tumor Marker Panel summarized 15 studies on 1.141 patients and a elevation of CEA in 50% of patients with breast cancer UICC IV and a false positive rate of 12%, whereas CA 15-3 (7 studies, n=1.672) was elevated in 67% of patients with UICC IV disease with a false positive rate of 8%.(350)

Preliminary data for the potential value of tumor markers for assessing response in metastatic disease are available, but further clinical evaluation is required. In a study on patients with advanced disease, patients with progressive disease had a median increase of CA27.29 levels of 32%, whereas patients with stable or regressing disease had a median decrease of 19%.(351) Among 43 patients with CA 27.29 levels increased 20% or more, progressive disease was confirmed in 33 patients. Further studies are required to determine whether the proposed greater sensitivity of the CA 27.29 assay will allow earlier determination of disease progression or will be achieved at the price of decreased specificity in the metastatic disease setting. The ASCO Panel concluded in view of the present data, that the routine use of CEA for monitoring response of metastatic disease to treatment is not recommended. However, in the absence of readily measurable disease, or an elevated MUC-1 marker (CA 15-3 and/or CA 27.29), a rising CEA may be used to suggest treatment failure.

Before implementing tumor markers in routine clinical use, it has to be considered, that low sensitivity and specificity of the assays require further clinical evaluation, increasing costs of health care significantly. Furthermore, fluctuation of values hampers interpretation in the single breast cancer patient. And, above all, so far no benefit in respect to an increased disease-free and overall survival could be demonstrated in sufficiently powered trials. Therefore, the recent update of the ASCO Recommendations for the use of Tumor Markers in Breast Cancer concluded, that present data is insufficient to recommend Ca 15-3, Ca 27.29 and CEA for screening,



diagnosis, staging or surveillance after primary treatment in routine clinical use.(350)

Another approach to intensified surveillance are follow-up strategies involving additional radiological and laboratory tests. Two prospectively randomized trials on 2563 women with early breast cancer were conducted, comparing women follow-up based on clinical visits and mammography with a more intensive scheme including radiological and laboratory tests,. The Italian National Research Council Project randomized 1.243 patients to conventional follow-up with medical history, physical examination and mammography compared to follow-up additionally including chest x-ray and bone scan. 112 pulmonary and 71 osseous events occurred during the study. Disease-free survival after 5 years amounted to 64.8% in the intensified group, compared to 71% in the conventional follow-up group. No difference could be found in overall survival with 18.6% and 19.5% after 5 years, respectively.(352) Another study on 1.320 patients additionally added evaluation of Alkaline Phosphatase,  $\gamma$ -GT, chest x-ray, liver ultrasound and bone scan in the intensified follow-up group. Metastatic disease was detected in 31% of patients in the intensified group versus 21% in the conventional group, before clinical symptoms occurred. As in the previous trial, no difference in overall survival could be found.(353) In an Cochrane analysis of both trials, no significant differences in overall survival (hazard ratio 0.96, 95% confidence interval 0.80 to 1.15) or disease-free survival (hazard ratio 0.84, 95% confidence interval 0.71 to 1.00) emerged after pooling the data. No differences in overall survival and disease-free survival emerged in subgroup analyses according to patient age, tumour size and lymph node status before primary treatment.(354)

Another possibility improving surveillance in breast cancer, might be to concentrate follow-up in specialized oncological centers. In one trial, 296 with breast cancer in remission were randomized to continuously specialist follow-up or follow-up by their own general practitioners in primary care. Surprisingly, primary care follow-up was not associated with a delay in diagnosing recurrence, nor with an increase in anxiety or deterioration in health-related quality of life.(355) The study also found that 69% of recurrences presented between follow-up visits and almost half of the recurrences in the specialist group presented first to the general practitioner. Despite the lack of clinical benefit from specialized care, an economic evaluation in this trial showed lower costs in primary care in contrast to specialized care (10.488 vs. £30.109£) Process measures of the quality of care, however, such as frequency and length of visits were superior in primary care. These results were confirmed by another randomized study on 196 patients comparing regularly scheduled follow-up visits to less frequent visits restricted to the time of mammography. No significant differences emerged in interim use of telephone and frequency of general practitioners consultations.(356)

Though most trials could demonstrate an earlier detection of metastases by an intensified follow-up, this lead time benefit could not be translated into an overall survival advantage in these patients. On the contrary, intensified follow-up resulted in a shortened disease-free survival. Furthermore, intensified follow-up is associated with reduced quality of life for the patients, as a consequence of the permanent confrontation with the disease and multiple diagnostic examinations. Consequently, follow-up programs based on the present guidelines, including regular physical





examinations and yearly mammography alone, appear to be as effective as more intensive approaches based on regular performance of laboratory and instrumental tests in terms of timeliness of recurrence detection, overall survival and quality of life. However, most of the studies included relatively small patient numbers, who received therapy according to the treatment guidelines at study entry. Since then, many more extremely effective agents have been developed. Therefore, sufficiently powered prospective trials including these new agents are urgently needed.

### **3.5 Translational Research Program to be conducted within Success**

#### ***3.5.1 Detection of circulating tumor cells in peripheral blood***

##### **3.5.1.1 Detection of circulating tumor cells in peripheral blood by immunocytochemistry**

The method for tumor cell detection in peripheral blood by immunocytochemistry, will be primarily used in this study, has been published recently.(297) Briefly, blood samples will be drawn into EDTA tubes to which a cell preservative was added.(357) The CellSearch™ System (Veridex, LLC, USA) will be used for the isolation and enumeration of isolated tumor cells. It consists of a standardized, semiautomated system for the preparation of blood samples used in combination with the CellSearch™ Epithelial Cell Kit. By adhesion to antibody-coated magnetic beads tumor cells expressing the epithelial-cell adhesion molecule will be enriched immunomagnetically, and subsequently labelled with the fluorescent nucleic acid dye 4,2-diamidino- 2-phenylindole dihydrochloride. Fluorescently labelled monoclonal antibodies specific for leukocytes (CD45–allophycocyan) and epithelial cells (cytokeratin 8,18,19–phycoerythrin) are used to distinguish epithelial cells from leukocytes. The identification and enumeration of isolated tumor cells are performed with the use of the CellSpotter™ Analyzer, a semiautomated fluorescence-based microscopy system that permits computer-generated reconstruction of cellular images. Nucleated cells lacking CD45 and expressing cytokeratin will be defined as tumor cells. Morphologic criteria are omitted and determination of tumor cell positivity relies only on the immunocytochemical staining of cells. A recent analysis has shown good accuracy, precision, linearity, and reproducibility of the system.(358)

##### **3.5.1.2 Detection of circulating tumor cells in peripheral blood by flow-cytometry**

Furthermore, immunocytochemical detection of circulating tumor cells will be compared to flow-cytometry. Mononuclear cells will be enriched by gradient centrifugation (OncoQuick®). Blood components are separated from mononuclear cells according to different densities and by a porous barrier, with the denser blood components migrating into the lower compartment of the tube. Centrifugation tubes will be filled with blood and centrifuged at 1600g for 20 min at 4°C. The porous barrier prevents a contamination of the separated mononuclear cells from the fraction



of blood cells. Validation studies have shown, that up to one tumor cell in 20 ml blood can be enriched via OncoQuick<sup>®</sup>. OncoQuick<sup>®</sup> centrifugation results in about 600fold enrichment of mononuclear cells and a depletion factor of 3.8. Mean tumor cell recovery rates were 87%.(281;282;359;360) In addition to the weight-specific enrichment by OncoQuick<sup>®</sup>, we will test an immunomagnetic approach of antigen-specific enrichment. The commercially available MACS<sup>®</sup>-system will use antibodies, linked to small paramagnetic beads, with an affinity for breast cancer cells. Thus marked cells can then be selected with a powerful magnet. We will use beads linked to the antiepithelial antibody *Ep-CAM* for positive selection.

Multiparameter flow cytometry has been used to detect breast cancer tumor cells in sentinel lymphnodes (361), bone marrow (362) and peripheral blood (363). Flow cytometry uses the principles of light scattering, light excitation, and emission of fluorochrome molecules to generate specific multiparameter data from particles and cells in the size range of 0.5µm to 40µm diameter. Cells are hydro-dynamically focused in a sheath of PBS before intercepting focused Laser-beams. Thus fluorochromes bound to monoclonal antibodies (mAbs) will emit light of a characteristic wavelength allowing an assessment of antigen expression on each individual cell. Light-emission characteristics are analyzed by special software that is able to distinguish multiple parameters. In our protocol, mAbs specific for CD45, Cytokeratin-18 (CK) and Thomsen-Friedenreich –Antigen (TF) will be used to exclude leukocytes (CD45<sup>+</sup>), while simultaneously selecting breast cancer cells (CK<sup>+</sup> and TF<sup>+</sup>). To reduce contamination-effects by fluorescing debris, CD45<sup>-</sup>/CK<sup>+</sup>/TF<sup>+</sup> cells are then assessed for morphological characteristics by their light-scattering-pattern adding information about size and granularity of detected cancer cells. Using a digital six-color flow cytometer (such as *FACSCanto*<sup>®</sup>, *Becton-Dickinson, Heidelberg*) one can add up to three further mAbs depending on scientific interest. Detection rates as low as 10<sup>-7</sup> (i.e. 1 cancer cell in 10000000 blood cells) were reported using similar protocols with multiple CK-mAbs(364). A recent study using only CK-18 and DNA–aneuploidy as cancer specific markers was able to reach similar results leaving room for four other markers of tumor cell characterisation (365).

### **3.5.2 Detection of tumor markers**

We will evaluate the clinical benefit of the Muc1- gene derived glycoprotein CA 27.29 (TOSOH AIA PACK 27.29, Tosoh Bioscience), for the early detection of metastases. *MUC1* gene codes for a large mucin glycoprotein that is expressed in most glandular epithelia. In malignant cells, Muc1 is overexpressed on the entire cell surface and shed into the circulation, making it potentially useful as a tumor marker in peripheral blood. A competitive immunoassay is used for the detection of CA 27.29, a specific part of the MUC1 coded glycoprotein. The labeled antibody binds to an 8-amino acid sequence, which corresponds to amino acids Ser-Ala-Pro-Asp-Thr-Arg-Pro-Ala. The combination of the labeled B27.29 antibody and the solidphase antigen purified from breast cancer cells forms a competitive assay with a decreasing exponential dose-response curve.(366)

### **3.5.3 Association of genomic variability with antitumor efficacy and**



## ***systemic toxicity***

Significant variability in the antitumor efficacy and systemic toxicity of Docetaxel, Gemcitabine, Epirubicin and Cyclophosphamide has been observed in cancer patients. However only few tools are known to predict either antitumor efficacy or adverse events. Gene expression profiles delivered an insight into the possibilities of prognostic and predictive statements by the analysis of tumor attribute.(367;368) But handling of frozen tissues requires an adequate infrastructure and analysis is costly. As a part of Pharmacogenomics, the examination of single nucleotide polymorphisms (SNPs) could deliver information about the antitumor efficacy and systemic toxicity based on the rationale of interindividual different drug metabolism and genomic variability. As well for Docetaxel as for Gemcitabine and Epirubicin metabolizing enzymes are known. The genetic variability of the coding genes results in different metabolizing activities of these enzymes, which could be the reason for interindividual different effects of the chemotherapy.

Different Cytochrome P450 enzymes account for the metabolism of Docetaxel. CYP3A4 accounts for the hydroxylation of Docetaxel(369) and variations of the multi drug resistance gene 1 (MDR1) and CYP 3A5 are discussed to be associated with interindividual pharmacokinetics of Docetaxel(370). Some SNPs of Docetaxel metabolizing enzymes have been associated with altered enzyme activity.(371) The detoxification of Epirubicin is mainly processed by the UDP-glucuronosyltransferase 2B7 (UGT2B7).(372) Several SNPs of the UGT2B7 are already described.(373-376)

Gemcitabine metabolic enzymes were examined in an European and African population.(377) For eight genes SNPs could be identified in this study. These genes code for enzymes like the Deoxycytidine kinase, the Cytidine deaminase, the Deoxycytidine monophosphate deaminase, Proteins of the Solute carrier family 28, the DNA polymerase alpha and the Thymidylate synthase.(377)

Cyclophosphamide is metabolized mainly by enzymes of the Cytochrome P450-family as well. CYP2B6 is an enzyme, which activates Cyclophosphamide(378) and for which some genetic variations are known.(379;380) Up to now pharmacogenetic variations, that have been significantly associated with drug response, were seen in at least two studies. Several studies revealed interindividual difference of systemic toxicity.(381)

Concerning recurrence the expression of some genes has been associated with prognosis. Genes of proliferation, invasion and signal transduction were validated to quantify the risk of distant recurrence of breast cancer.(382) Some of the genes encode for an amino-acid change as described in the dbSNP of the National Cancer Institute (<http://www.ncbi.nlm.nih.gov/projects/SNP>).

Most of the studies have sample sizes of fewer than 100 subjects. 3 studies have sample sizes of more than 500. This study is the first study to integrate the analysis of genetic variability into a prospective study.

For the DNA-examination a 8,5 ml blood sample is drawn into a CPDA (Citrat-Phosphat-Dextrose-Adenin)-Monovette®. DNA is extracted from Leukocytes after centrifugation.

The SNP-analysis is done by RT-PCR (realtime-PCR) using the ABI PRISM® 7000 Sequence Detection System (Applied Biosystems, Foster City). Blood should be collected at the time of randomisation and then be sent to the address mentioned



below.

### **3.5.4 Characterization of genetic alterations in peripheral blood of breast cancer patients**

The development of breast carcinomas and other solid malignancies is associated with numerous genetic alterations that accumulate during tumor growth and disease progression.(383) Allelic loss (LOH) and microsatellite instability (MSI) are reported to be early events in primary breast tumors and often occur with additional frequency in metastases DNA deletions at specific chromosomal loci in tumors lead to inactivation of growth-regulating and tumor-suppressing genes and thereby to immortalization of tumor cells.(384) Increased concentrations of extracellular DNA are detected in the blood of many cancer patients, whereas only small amounts of free circulating DNA are found in healthy individuals.(385;386) LOH can also be identified in circulating DNA detectable in the serum or plasma of patients with various forms of cancer including carcinoma of the breast, lung, kidney, gastrointestinal tract, and head and neck regions as well as melanoma.(386-390) The publications have shown that identification and characterization of tumor-specific alterations of extracellular DNA in body fluids, as blood and urine, might be of clinical utility and contribute to the understanding of the pathogenesis of cancer.

In the year 1947, the occurrence of circulating nucleic acids in plasma and serum was described for the first time. Thirty years later, the concentration of the free, circulating DNA in blood of tumor patients could be shown to be significantly increased using radioimmuno assays.(391) DNA concentrations of 180 ng/ml serum could be detected in tumor patients, compared with 23 ng/ml serum of healthy individuals. In the year 1987, Stroun et al. demonstrated that tumor cells deliver their DNA into the blood circulation.(392) The DNA levels in blood of patients with metastatic disease were found to be about twice higher than of patients with primary tumors referring to a possible correlation with progression of cancer. A correlation of genetic aberrations of the primary tumor with alterations of the circulating DNA in blood could also be observed. However, the origin of circulating nucleic acids in blood is not yet completely clarified. However, free, extracellular DNA is thought to be derived from apoptotic or necrotic cells and is released into the blood circulation early during the formation of a primary tumor.(385)

#### **3.5.4.1 Methods for the detection of genomic alterations**

Genomic DNA is extracted from plasma and leukocytes of patients with breast cancer using a QIAmp DNA Mini Kit (Qiagen, Hilden, Germany) and quantified by spectrophotometry. Leukocyte DNA of the corresponding patients serves as reference DNA. PCR is performed using 10 ng of DNA and specific fluorescence labeled microsatellite marker sets (e.g. TAM, FAM, HEX). A panel of suitable microsatellite marker sets was already tested for the analyses of LOH and MSI as tumor marker in our plasma/serum DNA assay. These 9 microsatellite markers: D3S1255 (3p23), D9S171 (9p21-22), D10S215 (10q22-23), D10S1765 (10q23.3), D13S218, (13q12-14), D16S421 (16q22-23) D17S250 (17q11.2-12), D17S855 (17q21) and TP53.6, (17p13.1) showed a high incidence of LOH in previous studies. As specified in the above parentheses, the markers are localized on different regions of the chromosomes 3, 9, 10, 13, 16 and 17.



For the analysis of the labeled PCR products capillary electrophoresis is performed on an automated Genetic Analyzer (Applied Biosystem). Results are computed as diagrams and the peaks are calculated using the Gene Scan analysis software. To identify possible associations between detected molecular alterations (LOH and MSI) and clinical pathological features the data are evaluated independently and in combination with each microsatellite.

An additionally established technique to analyze the PCR products is the gel electrophoresis. The amplified products are separated on a 15% non-denaturing polyacrylamide gel and are visualized by silver staining (Bio-Rad Laboratories GmbH, Munich, Germany). The alleles are quantified by densitometric scanning of the stained bands using the software NIH Image 1.62. LOH is assigned when the intensity ratio of one of the bands representing the tumor sample alleles differed by 50% from bands of the alleles of normal blood leukocytes from the same patient used as internal control. Microsatellite instability is defined as the presence of additional bands in the tumor DNA.

### 3.5.4.2 Previous results of genomic alterations

Leukocyte (reference) and plasma DNA of a patient with breast cancer were isolated and the validity of our marker panel was tested. Fig. 1 shows a data evaluation of the PCR products amplified with the markers D17S250 and D17S855. The sense primer (5') is fluorescence-labeled at the 5' end. The fluorescent PCR products were separated by a capillary electrophoresis on an automated Genetic Analyzer and the evaluation of the peaks was carried out by the Gene Scan Software.

In Fig.1, the length of the base pairs is shown on the abscissa while the ordinate demonstrates the registered fluorescence, represented as the height of the peaks corresponding to the quantity of PCR products. The right peak of the serum DNA is clearly smaller than that of the leukocyte sample, which points to a LOH. The occurrence of LOH could be confirmed by the division analysis of the peaks represented in the diagram according to the manual to the fragment analysis

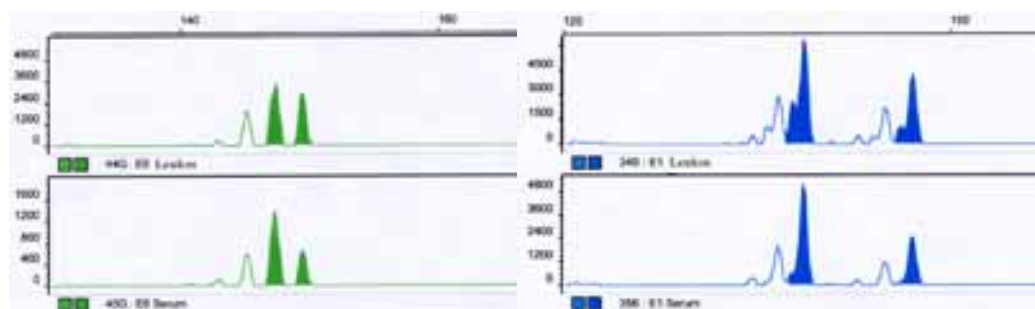

Figure 32: PCR with the fluorescence-labeled primers D17S250 und D17S855



### **3.5.5 Peripheral Blood Sampling**

At four predefined time points during treatment 50 ml of peripheral blood will be drawn and collected in tubes, provided by the study office. The predefined time points are the following:

- Before the start of chemotherapy
- After completion of chemotherapy, before the start of endocrine and zoledronate treatment
- Two years after completion of chemotherapy
- Five years after completion of chemotherapy

The blood samples will be examined for the following markers:

1. Tumor marker CA 27.29
2. Detection of isolated tumor cells, by immunocytochemistry and flow cytometry
3. Additional translational research questions, which will be appropriate to investigate the question of persisting minimal residual disease.

The probe has to be sent **immediately** by mail to:

#### **I. Frauenklinik, Klinikum Innenstadt**

**Tumorimmunologisches Labor**

**C/o Dr. B. Rack/ S. Hofmann**

**Maistr. 11**

**D-80337 München**

**Phone: +49-8951604239**

**Fax: +49-8951604339**

Blood tubes and further material for blood sampling and labeling will be provided and can be ordered via the Success study office. Please note that blood samples should be stored at room temperature. Please avoid performing blood sampling on Friday or the day before a public holiday to ensure quick processing.

The investigator will be informed of the results of the blood tests.

Positive MRD screening in this study will be defined as either the detection of isolated tumor cells in peripheral blood (1.) or of tumor marker elevation exceeding two fold the normal range (2.).

If the screening is positive in one blood sample, a second, additional sample should be drawn after 3 months.

If MRD screening will be positive in two subsequent tests, we advise an intensified



metastases screening for the duration of 6 months. Intensified metastases screening should include clinical examination as well as chest radiography, ultrasonography of the liver and bone scan every three months. Aim of this procedure is the earlier detection of tumor recurrence, ensuring an adequate treatment after the detection of metastases as soon as possible. Therapeutic consequences, however, should only be conducted in case of relapse detected by conventional techniques, and are at the discretion of the responsible physician in charge.

## **4 Objectives**

### **4.1 Primary Objective**

The primary objective of this study is to compare the disease free survival after randomisation in patients treated with 3 cycles of Epirubicin-Fluorouracil-Cyclophosphamide(FEC)-chemotherapy, followed by 3 cycles of Docetaxel(D)-chemotherapy versus 3 cycles of Epirubicin-Fluorouracil-Cyclophosphamide(FEC), followed by 3 cycles of Gemcitabine-Docetaxel(DG)-chemotherapy, and to compare the disease free survival after randomisation in patients treated with 2 years of Zoledronate versus 5 years of Zoledronate.

### **4.2 Secondary Objectives**

The secondary objectives of this study are to compare the following items in the four regimen arms:

- Overall survival time after randomization
- Distant disease free survival
- Toxicity
- Changes in quality of life over time as defined by EORTC QLQ-C30 and QLQ-BR23 questionnaire
- Skeletal related events
- Incidence of secondary primaries
- Endpoints of adjunct translational research program

### **4.3 Additional Scientific Objectives**

- The predictive and prognostic value of MRD surveillance as defined in the relevant section of this protocol
- The predictive and prognostic value of additional surveillance markers as defined in the relevant section of this protocol
- Evaluation of genomic alterations in respect to tumor biology, treatment efficacy and systemic toxicity of antitumor agents.



## 5 Investigational Plan

### 5.1 Summary of Study Design

This is an open-label, multicenter, 2x2 factorial design, randomized controlled, Phase III study comparing the disease free survival after randomisation in patients treated with 3 cycles of Epirubicin-Fluorouracil-Cyclophosphamide(FEC)-chemotherapy, followed by 3 cycles of Docetaxel(D)-chemotherapy versus 3 cycles of Epirubicin-Fluorouracil-Cyclophosphamide(FEC), followed by 3 cycles of Gemcitabine-Docetaxel(DG)-chemotherapy, and to compare the disease free survival after randomisation in patients treated with 2 years of Zoledronate versus 5 years of Zoledronate in patients with early primary breast cancer. Patients will be required to have histopathological proof of axillary lymph node metastases (pN<sub>1-3</sub>) **or** high risk node negative, defined as: 'pT $\geq$ 2 **or** histopathological grade 3, **or** age  $\leq$  35 **or** negative hormone receptor', but are not allowed to have evidence of distant disease. Patients will have to be entered into the study no later than 6 weeks after complete resection of the primary tumor. No other antineoplastic treatment other than surgical treatment, the defined cytotoxic and endocrine treatment and radiotherapy will be allowed prior to study entry and during the course of the study.

After surgery, leading to R<sub>0</sub> resection of the invasive and intraductal components of the primary tumor, patients will be randomized to one of the following treatments:

#### **First randomization** **A**

**AA:** 3 cycles of 5-Fluorouracil 500 mg/m<sup>2</sup> i.v. body surface area and Epirubicin 100 mg/m<sup>2</sup> i.v. and Cyclophosphamide 500 mg/m<sup>2</sup> i.v., (FEC100), each administered on day 1, repeated on day 22, subsequently followed by 3 cycles of Docetaxel 75 mg/m<sup>2</sup> body surface area i.v. (D), and Gemcitabine 1000 mg/m<sup>2</sup> i.v. (30 min infusion) (G), administered on day 1, followed by Gemcitabine 1000 mg/m<sup>2</sup> i.v. (30 min infusion) on day 8, repeated on day 22

**AB:** 3 cycles of 5-Fluorouracil 500 mg/m<sup>2</sup> i.v. body surface area and Epirubicin 100 mg/m<sup>2</sup> i.v. and Cyclophosphamide 500 mg/m<sup>2</sup> i.v., (FEC100), each administered on day 1, repeated on day 22, subsequently followed by 3 cycles of Docetaxel 100 mg/m<sup>2</sup> body surface area i.v. (D), administered on day 1, repeated on day 22

#### **Second randomization** **B**

**BA:** Zoledronic acid 4 mg i.v., every 3 months for the duration of two years, subsequently followed by zoledronic acid 4 mg i.v., every 6 months for the duration of additional three years

**BB:** Zoledronic acid 4 mg i.v., every 3 months for the duration of two years

During the zoledronic acid treatment period, patients will receive 500 mg Calcium p.o. qid and 400 i.E. Vitamin D p.o. qid.





## Study Design

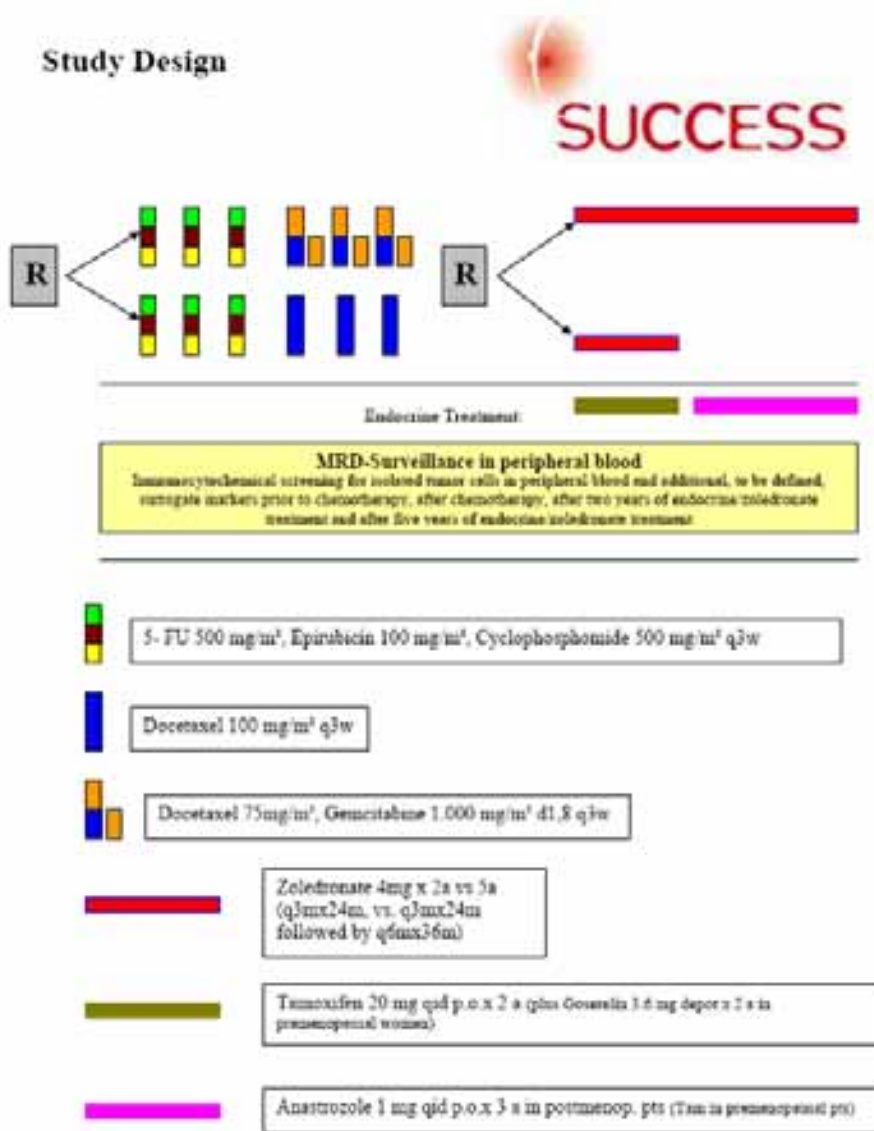

Patients with positive hormone receptor status ( $\geq 10\%$  positively stained cells for estrogen and/or progesterone) of the primary tumor will receive **tamoxifen** treatment 20 mg p.o. per day for 2 years, after the end of chemotherapy. Postmenopausal patients with positive hormone receptor status will be treated subsequently with anastrozole (Arimidex®) 1 mg p.o. for additional 3 years, premenopausal patients will continue Tamoxifen treatment for additional 3 years. In case of contraindications against tamoxifen or severe adverse effect during the treatment with tamoxifen, anastrozole will be given before the end of the initial 2 years. In addition to tamoxifen, all patients with positive hormone receptor status of the primary tumor and under the age of 40 or restart of menstrual bleeding within 6 months after the completion of cytostatic treatment or with premenopausal hormone levels as defined below will receive **goserelin** (Zoladex®) 3.6 mg subcutaneously every 4 weeks over a period of 2 years.(2;3) Premenopausal endocrine status will be assumed, if the following serum levels are met: LH < 20 mIE/ml, FSH < 20 mIE/ml and E<sub>2</sub> > 20 pg/ml.



Endocrine therapy will start after the end of chemotherapy. All patients with breast conserving therapy or at least 4 axillary lymph node metastases will receive adjuvant **radiotherapy** following the completion of the systemic cytotoxic treatment. If necessary to meet patients' needs or for logistic reasons, the radiotherapy may also be administered intermittently following the completion of 50 % of the cytotoxic treatment.

Each patient remains in the study until either the patient or the investigator determine discontinuation to patient's best interest. The treatment has to be discontinued in any case of intolerable toxicity.

Each patient's treatment modality will be unknown until the time of randomization.

**Randomization** will be stratified on the baseline prognostic variable of metastatic axillary lymph node involvement and the hormone receptor status of the primary tumor, histopathological grading, menopausal status, as well as the study center.

For each factor the following **strata** will be formed:

- Metastatic axillary lymph node involvement:
  - No evidence of metastatic axillary lymph nodes or unknown axillary status
  - 1-3 metastatic axillary lymph nodes
  - 4-9 metastatic axillary lymph nodes vs.
  - $\geq 10$  metastatic axillary lymph nodes
- Hormone receptor status ( $\geq 10$  % positively stained cells for estrogen and/or progesterone) of the primary tumor:
  - negative vs.
  - positive
- Histopathological grading:
  - G1 vs.
  - G 2-3
- Menopausal status
  - Premenopausal
  - Postmenopausal
- HER2-neu Status
  - Positive
  - Negative
  - Unknown

Docetaxel medication for node negative patients will be provided by the manufacturer Sanofi-Aventis at his own cost. Zoledronic acid medication for all patients will be provided by the manufacturer Novartis at his own cost. Gemcitabine medication for all patients in treatment arm AB will be provided by the manufacturer Lilly at his own cost.

**Peripheral blood samples** will be drawn from each patient before starting chemotherapy, after the completion of the chemotherapy, after 2 years of Tamoxifen treatment and after 5 years of endocrine treatment. In case of considerable risk for subsequent relapse, as defined in the relevant chapter of the translational research program, patients will be subjected to intensified follow-up, including chest x-ray, liver sonography and bone scan.



## 5.2 Discussion of Design and Control

A 2x2 factorial design study without controls is appropriate for the goals of this study because all treatment regimes have been proven to be effective in the treatment of patients with breast cancer as described in the background section. There is no evidence that the treatment arms of the two randomization cause any conflict for the treatment of the other randomization.

The study population has been restricted to patients with high-risk for relapse. The high risk for relapse in these patients is defined by evidence of axillary lymph nodes status or by additional tumor biological characteristic, as defined in the inclusion criteria. Because of the potential toxicity of therapy regimens, those patients with a low risk for recurrence will be excluded from the study.

## 5.3 Investigator Information

Physicians with a specialty in medical oncology or gynecological oncology will participate as investigators in this clinical trial.

The names, titles, institutions and professional addresses of the investigators are listed in the appendix and in the Contracts for Protocol SUCCESS-Trial, provided with this protocol.

If investigators are added after the trial has been approved by the Steering Committee, an ethical review committee or a regulatory agency, these updates will not be considered changes to the protocol, but rather to the Contracts for Protocol SUCCESS-Trial.

### 5.3.1 Final Report Signature

Prof. Dr. H. Sommer will serve as the final report coordinating investigators, and will sign the final clinical study report for this trial, indicating agreement with the analyses, results, and conclusions of the report.

The study will be terminated, if one of the conditions for premature discontinuation, as described in the relevant chapter, is observed, or if **all** of the following criteria are met:

- The minimum follow-up time after the last zoledronate application for all patients is at least 6 months
- All patients have received the study medication, including zoledronate
- The median follow-up time for all patients exceeds 45 months or 850 cancer associated deaths are noted.

## 5.4 Study Population

### 5.4.1 Entry Procedures

An informed consent will be obtained from each patient after the nature of the study is explained.

Invasive dental procedures should be avoided if possible during the study. However



for patients who develop ONJ or require dental procedures during the study, the patient may choose to continue or discontinue the study based on the individual risk benefit discussion with their physician. There is currently limited data to define whether discontinuation of bisphosphonate in these situations impact the outcome of ONJ or reduces the risk of developing ONJ after dental procedures.

#### **5.4.2 Criteria for Enrollment**

The terminology for the criteria for enrollment are defined as:

**Enter** The act of obtaining informed consent for participation in a clinical study from individuals deemed potentially eligible to participate in the SUCCESS-Trial. Individuals **entered** into the study are those for whom informed consent documents for the study have been signed by the potential study participants.

Adverse events are reported for each individual who has entered the SUCCESS-Trial, even if the individual is never assigned to a treatment group.

**Enroll** The act of assigning an individual to a treatment group. Individuals who are **enrolled** in the SUCCESS-Trial are those who have been assigned to a treatment group.

A person who has been entered into the SUCCESS-Trial is potentially eligible to be enrolled in the study, but must meet all criteria for enrollment specified in the protocol before being enrolled (assigned to a treatment group).

Individuals who are entered into the SUCCESS-Trial but fail to meet the criteria for enrollment are not eligible to participate in the study and will not be enrolled.

Adverse events are reported for all individuals who have entered the study and all individuals who are enrolled in the SUCCESS-Trial (assigned to treatment groups).

The numbering system used for inclusion and exclusion criteria provides a unique number for each criterion and allows for efficiency in data collection.



### 5.4.3 Inclusion Criteria

Patients may be **included** in the study only if they meet **all** the following criteria:

- [1.] Primary epithelial invasive carcinoma of the breast pT<sub>1-4</sub>, pM<sub>0</sub>
- [2.] Histopathological proof of axillary lymph node metastases (pN<sub>1-3</sub>) **or** high risk pN0/NX, defined as: 'pT ≥ 2 **or** histopathological grade 3 **or** age ≤ 35 **or** negative hormone receptor status'
- [3.] Complete resection the primary tumor with margins of resection free of invasive carcinoma not more than 6 weeks ago
- [4.] Females ≥ 18 years of age
- [5.] Performance Status ≤ 2 on ECOG-Scale
- [6.] Adequate bone marrow reserve: leucocytes ≥ 3.0 x 10<sup>9</sup>/l and platelets ≥ 100 x 10<sup>9</sup>/l
- [7.] Bilirubin within one fold of the reference laboratory's normal range, ASAT (SGOT), ALAT (SGPT) and AP within 1,5 fold of the reference laboratory's normal range for patients t
- [8.] Intention of regular follow-up visits for the duration of the study
- [9.] Ability to understand the nature of the study and to give written informed consent

### 5.4.4 Exclusion Criteria

Patients will be **excluded** from the study for **any** of the following reasons:

- [10.] Inflammatory breast cancer
- [11.] Previous or concomitant cytotoxic or other systemic antineoplastic treatment which is not part of or allowed within this study
- [12.] History of treatment or disease affecting bone metabolism (e.g., Paget's disease, primary hyperparathyroidism)
- [13.] Prior treatment with bisphosphonates within the last 6 months
- [14.] Severe renal insufficiency as evidenced by creatinine clearance < 30 ml/min as calculated using the Cockcroft-Gault formula:  
CrCl: 
$$\frac{140 - \text{Age}(\text{years}) * \text{weight}(\text{kg}) * 0,85}{72 * \text{Serum} - \text{Creatinin}(\text{mg} / \text{dl})}$$
- [15.] Second primary malignancy (except in situ carcinoma of the cervix or adequately treated basal cell carcinoma of the skin)
- [16.] Cardiomyopathy with impaired ventricular function (NYHA > II), cardiac arrhythmias influencing LVEF and requiring medication, history of myocardial infarction or angina pectoris within the last 6 months, or arterial hypertension not being controlled by medication
- [17.] Any known hypersensitivity against docetaxel, epirubicin, cyclophosphamide, fluorouracil, gemcitabine or any other medication included in the study protocol
- [18.] Use of any investigational agent within 3 weeks prior to inclusion
- [19.] Patients in pregnancy or breast feeding (in premenopausal women anticonception has to be assured: intra uterine devices, surgical methods of sterilization, or, in hormone unsensitive tumors only, oral, subcutaneous or transvaginal hormonal, non estrogen containing contraceptives)
- [20.] Current active dental problems including infection of the teeth or jawbone



(maxilla or mandibular); dental or fixture trauma, or a current or prior diagnosis of osteonecrosis of the jaw (ONJ), of exposed bone in the mouth, or of slow healing after dental procedures.

[21.] Recent (within 6 weeks) or planned dental or jaw surgery (e.g.. extraction, implants)

#### **5.4.5 Violation of Criteria for Enrollment**

The criteria for enrollment must be followed explicitly. If there is an inadvertent enrollment of individuals who do not meet enrollment criteria, these individuals have to be discontinued from the study. Such individuals can remain in the study only if there are ethical reasons to have them continue. In these cases, the investigator must obtain approval from the sponsor for the study participant to continue in the study.

#### **5.4.6 Disease Diagnostic Criteria**

Patients will be required to have histopathological proof of epithelial breast cancer pT1-4 and proof of axillary lymph node metastases (pN<sub>1-3</sub>) **or** high risk node negative, defined as: 'pT $\geq$ 2 **or** histopathological grade 3, **or** age  $\leq$  35 **or** negative hormone receptor'. The complete resection of the primary tumor with margins of resection free of invasive carcinoma must be verified by histopathological examination. The estrogen receptor status has to be evaluated by immunohistochemistry scoring semi-quantitatively the intensity of staining. Distant metastatic disease has to be excluded by chest x-ray, ultrasonography of the liver and whole body bone scan. Note that the AJCC TNM-Classification Breast Cancer 6th edition has to be used as of July 1st 2003. The following paragraph summarizes the changes, compared to the previous edition of the classification system.(393)

#### **Summary of Changes AJCC TNM-Classification Breast Cancer 5<sup>th</sup> vs. 6<sup>th</sup> edition**

- Micrometastases are distinguished from isolated tumor cells on the basis of size and histologic evidence of malignant activity.
- Identifiers have been added to indicate the use of sentinel lymph node dissection and immunohistochemical or molecular techniques.
- Major classifications of lymph node status are designated according to the number of involved axillary lymph nodes as determined by routine hematoxylin and eosin staining (preferred method) or by immunohistochemical staining.
- The classification of metastasis to the infra-clavicular lymph nodes has been added as N3.
- Metastasis to the internal mammary nodes, based on the method of detection and the presence or absence of axillary nodal involvement, has been reclassified. Microscopic involvement of the internal mammary nodes detected by sentinel lymph node dissection using lymphoscintigraphy, but not by imaging studies or clinical examination, is classified as N1. Macroscopic involvement of the internal mammary nodes as detected by imaging studies (excluding lymphoscintigraphy) or by clinical examination is classified as N2 if it occurs in the absence of metastases to the axillary lymph nodes, or as N3 if it occurs in the presence of metastases to the axillary lymph nodes.
- Metastasis to the supraclavicular lymph nodes has been reclassified as N3 rather



than M1.

## 5.5 Patient Assignment

All patients will be randomized to receive either 3 cycles of Epirubicin-Fluorouracil-Cyclophosphamide(FEC)-chemotherapy, followed by 3 cycles of Docetaxel(D)-chemotherapy **or** 3 cycles of Epirubicin-Fluorouracil-Cyclophosphamide(FEC), followed by 3 cycles of Gemcitabine-Docetaxel(DG)-chemotherapy, **and** 2 years of Zoledronate **or** 5 years of Zoledronate. Randomization will be stratified and performed as described previously.

## 5.6 Dosage and Administration

Accountability for the investigational products lies with the investigator. The investigator has the responsibility to explain the correct use of the investigational products and to check at appropriate intervals that each study participant is following instructions properly.

### 5.6.1 Materials and Supplies

#### 5.6.1.1 Docetaxel

Docetaxel is one of two currently available taxanes. Taxanes are a member of the plant alkaloid group, which also comprises vinca alkaloids and epipodophyllotoxins. The drug is derived from the Pacific yew (*Taxus brevifolia*). It functions by stabilizing microtubules and thereby preventing their disassembly.

The incidence of treatment-related mortality associated with docetaxel therapy is increased in patients with abnormal liver function. Patients with elevations of bilirubin or abnormalities of transaminase concurrent with alkaline phosphatase are at increased risk for the development of grade 4 neutropenia, febrile neutropenia, infections, severe thrombocytopenia, severe stomatitis, severe skin toxicity and toxic death. For this reason, Bilirubin has to be within one fold of the reference laboratory's normal range, ASAT (SGOT), ALAT (SGPT) and AP within 1,5 fold of the reference laboratory's normal range for patients to be included into this study.

Taxane infusions are frequently associated with hypersensitivity reactions manifested initially by hypotension, bronchospasm, and urticaria. The risk for hypersensitivity reactions seems to be lower in docetaxel than in paclitaxel. However, extensive premedication is advised in patients with a history or disposition for hypersensitivity reactions and significantly abrogate this problem. Bradyarrhythmias, especially AV block, atypical chest pain, and rarely more severe cardiac problems have also been associated with taxane infusions. Bone marrow suppression with neutropenia is the dose-limiting toxicity. For this reason, only patients with adequate bone marrow reserve (neutrophils  $\geq 1.5 \times 10^9/l$  and platelets  $\geq 100 \times 10^9/l$ ) will be included into the study. Peripheral neuropathy with paresthesias in a glove-stocking distribution also is common. Peripheral neuropathy is only in part reversible and there is no advisable precaution to prevent this complication to date. Severe fluid retention occurs in approximately 6.5 % of the patients despite the use of a 3-day dexamethasone premedication, as planned with this protocol. The severe fluid retentions may



comprise poorly tolerated peripheral edema, generalized edema, pleural effusion requiring urgent drainage, dyspnoea at rest, cardiac tamponade, or pronounced abdominal distention due to ascites. Patients with pre-existing effusions should be closely monitored from the first dose for the possible exacerbation of the effusions. When fluid retention occurs, peripheral edema usually starts in the lower extremities and may become generalized with a median weight gain of 2 kg. Other toxicities include mucositis, myalgias, and alopecia.(394)

### 5.6.1.2 Cyclophosphamide

Cyclophosphamide is member of the alkylating agent family, one of the most widely used antitumor agents. These drugs lead to inhibition of DNA synthesis by forming covalent bonds with nucleic acids. Most alkylating agents are bifunctional and are efficient at cross-linking DNA with subsequent strand breakage and ultimately cell death. These agents add alkyl groups to the N-7 guanine in addition to other nitrogen or oxygen positions in adenine or cytidine. Although alkylation of DNA can occur at any phase of the cycle, cytotoxicity is greatest in those cells that are progressing through the cell cycle. Cyclophosphamide is only active after microsomal liver metabolism to 4-hydroxycyclophosphamide. It is further metabolized in peripheral tissues to phosphoramidate mustard and to acrolein.

The most common dose-limiting toxicity of cyclophosphamide is myelosuppression. The severity and duration varies with the individual drugs, but is moderate with cyclophosphamide. This agent is also quite emetogenic and requires extensive premedication as referred to in the relevant chapter of this protocol.

Cyclophosphamide therapy may be complicated by hemorrhagic cystitis, believed to be due to the metabolite acrolein, which is excreted unchanged in the urine.

Adequate hydration and administration of the bladder protectant mesna, as planned with this protocol, can prevent this complication. Cyclophosphamide is also associated with a syndrome of inappropriate antidiuresis due primarily to a distal renal tubular effect. Amenorrhea and ovarian atrophy, sometimes permanent, have been associated with alkylating agent therapy in women. Because of the possible resumption of normal menstrual cycles, which is inversely related to the age of the patient and the cumulative dose received, ovarian ablation has been included into this protocol for all patients under the age of 40.

A serious long-term complication of alkylating agent chemotherapy is the development of secondary leukemias. In patients who have received an alkylating agent as part of combination chemotherapy, the incidence of secondary acute myeloid leukemia may be as high as 5 to 10 %. This data, however, originate from patients treated for lymphomas. In breast cancer patients the risk for the development of secondary leukemias is presumably lower because of lower doses of the alkylating agent and because of a lower baseline risk for leukemias in these patients compared to patients with lymphomas.(394)

### 5.6.1.3 Fluorouracil

5- Fluorouracil (5-FU) is a fluorinated pyrimidine-analogue antimetabolit. For cytotoxicity, fluorouracil requires intracellular activation to one of several metabolites. Fluorodeoxyuridine monophosphate is a potent inhibitor of thymidylate synthase, an enzyme necessary for the synthesis of dTTP and ultimately DNA. Fluorouridine





triphosphate incorporates into RNA and interferes with its processing and function. Fluorodeoxyuridine triphosphate is incorporated into DNA and eventually leads to DNA strand breakage. The importance of each of these mechanisms to fluorouracil-induced cytotoxicity has not been fully delineated. Studies suggest that tumor cells may be deficient in reduced folates, so leucovorin has been administered fluorouracil in an attempt to increase antitumor activity.

Like most antimetabolites, fluorouracil's toxicity is schedule dependent. With bolus infusion, bone marrow suppression predominates whereas with continuous infusion therapy gastrointestinal toxicity may be more limiting. For this reason, an infusion interval of 15 minutes has been decided for this study. Fluorouracil has been infrequently associated with myocardial ischemic syndrome characterized by chest pain, ECG and isoenzyme changes. For this reason, patients with cardiomyopathy and impaired ventricular function (NYHA > II), cardiac arrhythmias influencing LVEF and requiring medication, and patients with a history of myocardial infarction or angina pectoris within the last 6 months, or arterial hypertension not being controlled by medication will be excluded from this study. Neurological symptoms, usually reversible, have been reported that include headaches, cerebellar ataxia and somnolence. Dermatological complaints are not uncommon and include dermatitis, hyperpigmentation, and skin atrophy.(394)

#### 5.6.1.4 Epirubicin

Epirubicin is member of the anthracycline group of antitumor antibiotics. The anthracyclines are cell-cycle active and phase nonspecific but have pleiotropic actions upon the cell. Although they are classic DNA intercalating agents, their mechanism of cytotoxicity is likely related to interaction with the enzyme topoisomerase II with production of double-stranded DNA breaks. Other data suggest that the anthracyclines undergo one- and two-electron reductions generating intracellular free radicals, particularly the hydroxyl radical, which is highly cytotoxic. Epirubicin is highly myelosuppressive. For this reason, only patients with adequate bone marrow reserve (neutrophils  $\geq 1.5 \times 10^9/l$  and platelets  $\geq 100 \times 10^9/l$ ) will be included into the study. White cell and platelet count nadirs will occur 10 to 14 days after treatment. The anthracyclines cause gastrointestinal toxicity including acute nausea and vomiting and mucositis later. These agents are severe vesicants. Extravasations during infusion can lead to local tissue necrosis. In extreme cases skin grafting or even amputation may be required. For these reason, great caution as to the infusion sight should be given. The i.v. line has to be tested with saline infusions cautiously before administering epirubicin. Anthracyclines are cleared predominantly by liver metabolism. For this reason, SGOT, SGPT, Alkaline Phosphatase, Bilirubin, Albumin have to be within 1.5 fold of the reference laboratory's normal range for patients to be included into this study. Long-term administration of anthracyclines is limited by cumulative dose-dependent cardiotoxicity. Irreversible cardiomyopathy with serious congestive heart failure is a significant risk in patients who have received doses in excess of 900 mg epirubicin/m<sup>2</sup> body surface area. The cumulative epirubicin dose will be 360 mg/m<sup>2</sup> body surface area in treatment Arm A and 720 mg/m<sup>2</sup> body surface area in the mainly anthracycline-based treatment Arm B. For this reason, great caution should be taken when anthracycline containing second line chemotherapies will be considered in these patients.(394)



Recent publications demonstrate that the incidence of cardiomyopathy increases significantly within the first 6 months of the last application of epirubicin.(395;396) A common property of cardiac toxicity associated with cardiac matrix alterations, including anthracycline cardiotoxicity, is the salutary effect of prolonged ACE inhibition. Without ACE inhibition the prognosis of anthracycline-induced CHF is grave , resembling the general prognosis of CHF and idiopathic cardiomyopathy with a mortality rate of about 50% within 2 years of diagnosis.(395;397;398) In a current prospective study with ACE inhibition only 1 of 10 patients with severe heart failure (NYHA class III–IV) died of CHF. The patients with a decreased cardiac function did not spontaneously recover during the observation period but function could only be reversed by ACE inhibition for several months. The investigators have successfully treated a total of more than 60 patients with severe CHF after anthracycline therapy with ACE inhibition, with a remarkably long-lasting recovery evaluated clinically and by LVEF determination.(395) This corresponds to trials with ACE inhibition documenting the necessity of ACE inhibitor therapy lasting years in heart failure,(399;400) and this should probably also be the case after anthracycline-induced CHF.

**Figure: Risk of epirubicin-induced congestive heart failure (CHF) (A) and recovery after angiotensin-converting enzyme (ACE) inhibition (B)(395)**

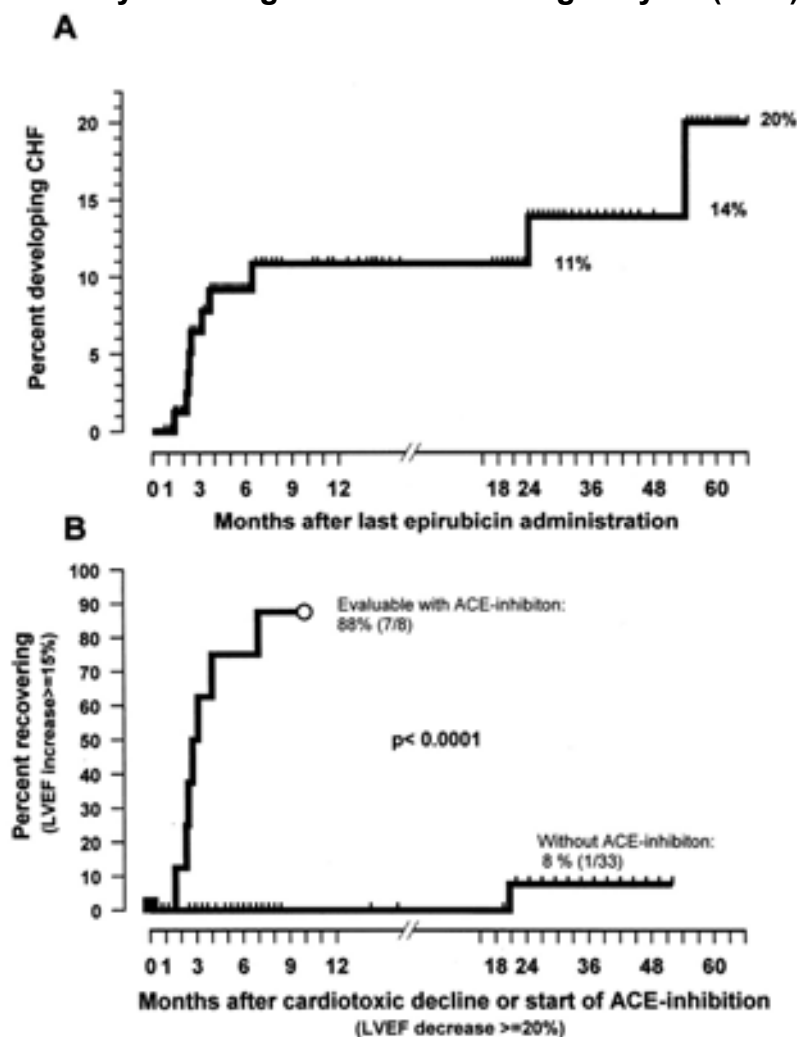

For the reasons mentioned above, LVEF monitoring by ultrasoundcardiography will be performed whenever cardiac symptoms occur, which justify this examination.

### 5.6.1.5 Gemcitabine

Gemcitabine [2'-deoxy-2',2'-difluorocytidine monohydrochloride (beta isomer); dFdC] is a novel deoxycytidine analogue which was originally investigated for its antiviral effects but has since been developed as an anticancer therapy. It is a pro-drug and, once transported into the cell, must be phosphorylated by deoxycytidine kinase to an active form. Gemcitabine is phosphorylated intracellularly to difluorodeoxycytidine triphosphate, which terminates DNA-chain elongation and competitively inhibits DNA polymerase and ribonucleotide reductase. After i.v. administration, gemcitabine is rapidly distributed into total body water. The drug is deaminated in the plasma to inactive difluorodeoxyuridine; both gemcitabine and difluorodeoxyuridine are primarily renally eliminated.(401) Both gemcitabine diphosphate (dFdCTP) and gemcitabine triphosphate (dFdCTP) inhibit processes required for DNA synthesis. Incorporation of dFdCTP into DNA is most likely the major mechanism by which gemcitabine causes cell death. After incorporation of gemcitabine nucleotide on the end of the elongating DNA strand, one more deoxynucleotide is added and thereafter, the DNA polymerases are unable to proceed. This action ("masked termination") apparently locks the drug into DNA as the proofreading enzymes are unable to remove gemcitabine from this position. Furthermore, the unique actions that gemcitabine metabolites exert on cellular regulatory processes serve to enhance the overall inhibitory activities on cell growth. This interaction is termed "self-potentialiation" and is evidenced in very few other anticancer drugs.(402)

Gemcitabine monotherapy produced an objective tumor response in 18 to 26% of patients with advanced non-small cell lung cancer (NSCLC) and appears to have similar efficacy to cisplatin plus etoposide. Objective response rates ranging from 26 to 54% were recorded when gemcitabine was combined with cisplatin, and 1-year survival duration after such treatment ranged from 35 to 61%. Improvements in a range of NSCLC disease symptoms and/or in general performance status occurred in many patients who received gemcitabine, with or without cisplatin, in 3 clinical trials. Gemcitabine appears to be cost effective compared with best supportive care for NSCLC. In addition, direct costs associated with administration of gemcitabine monotherapy may be lower than those for some other NSCLC chemotherapy options, according to retrospective cost-minimisation analyses. The combination of gemcitabine plus cisplatin was associated with a lower cost per tumor response than cisplatin plus etoposide or cisplatin plus vinorelbine, according to a retrospective cost-effectiveness analysis. In a single comparative study in patients with advanced pancreatic cancer, gemcitabine was more effective than fluorouracil with respect to survival duration and general clinical status. It also showed modest antitumor and palliative efficacy in patients refractory to fluorouracil. Gemcitabine appears to be well tolerated, although further comparisons with other chemotherapy regimens are required.(403)

In breast cancer, as a single agent, gemcitabine yields response rates ranging from 14%-37% as first-line therapy for advanced breast cancer and 23%-42% as salvage therapy. However, these were small studies with large confidence intervals around all the indices of benefit including response rate, response duration, and time to disease progression. Gemcitabine is associated with higher response rates when used in

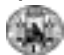

combination with other agents.(52) The combination of gemcitabine and anthracyclines-containing double- and triple-drug combinations used to treat patients with early-stage and advanced breast cancer were promising, with good tolerability and overall response rates ranging from 33%-89% in advanced disease and up to 95% in the neoadjuvant treatment of early-stage disease.(54) Numerous phase II clinical studies have combined gemcitabine with other active agents such as the taxanes, vinorelbine, vindesine, cisplatin, 5-fluorouracil, as well as anthracyclines across various regimens and conditions of pretreatment. Most of these two-drug combinations have consistently demonstrated higher efficacy than either single agent, particularly in pretreated patients. Even higher efficacy has been obtained with triple-drug regimens including gemcitabine, anthracyclines (epirubicin or doxorubicin), and paclitaxel; these regimens have yielded overall response rates of 58-92% as first-line treatment.(53)

In an early review, the toxicity profile of gemcitabine was analyzed in a large group of patients (up to 790) from pivotal phase II studies, in which the drug was given intravenously as a 30 min infusion, in a schedule once a week for 3 weeks followed by a week of rest. The safety profile of gemcitabine is unusually mild for such an active agent in solid tumors. Haematological toxicity is mild and short-lived with modest WHO grades 3 and 4 for haemoglobin (6.4% and 0.9% of patients), leukocytes (8.1% and 0.5%), neutrophils (18.7% and 5.7%) and platelets (6.4% and 0.9%). The incidence of grade 3 and 4 infection associated with this level of myelosuppression was low (0.9% and 0.2%). Transaminase elevations occurred frequently, but they were usually mild, and rarely dose limiting. Mild proteinuria and haematuria were seen but were rarely clinically significant. There was no evidence of cumulative hepatic or renal toxicity. Nausea and vomiting was mild, rarely dose limiting, and generally well controlled with standard antiemetics. Flu-like symptoms were experienced in a small proportion of patients but were of short duration. Where oedema/peripheral oedema was experienced there was no evidence of any association with cardiac, hepatic or renal failure. Hair loss was rare, with WHO grade 3 alopecia reported in 0.5% of patients. There was no grade 4 alopecia. Furthermore, gemcitabine displayed minimal toxicity in elderly patients, and the side-effect profile does not seem to be affected by patient age. The adverse events typically experienced with cytotoxic agents, namely myelosuppression, nausea and vomiting and alopecia, are not seen to such a degree with gemcitabine, and this nonoverlapping toxicity profile suggests that gemcitabine is a promising agent for incorporation into combination chemotherapy regimens.(404)

#### **5.6.1.6 Tamoxifen**

Tamoxifen, a first generation selective estrogen receptor modulator, has been studied most extensively. It can be employed both as an adjuvant in estrogen receptor positive women and as palliative therapy for metastatic disease to the estrogen receptor and appears to function as a weak agonist/antagonist. The cellular actions of tamoxifen are not completely understood, but it appears that the drug's antiproliferative effects are mediated primarily by inhibition of the activities of estrogen through binding to estrogen receptors. It has a long plasma half-life and requires 4 weeks or longer to achieve steady-state levels. Tamoxifen can cause amenorrhoea, hot flashes, and occasionally nausea and vomiting. It has been reported to modestly increase the risk of thromboembolic phenomenon. The risk for



endometrial cancer among women with breast cancer might increase following use of tamoxifen, recently classified as a carcinogen of the human endometrium. However, this risk is small and, by far, outweighed by the antitumoral effects of tamoxifen.(405;406) Changes in serum lipid profiles also have been noted.(394)

### 5.6.1.7 Anastrozole

Aromatase inhibitors inhibit several enzymes responsible for the conversion of androgens to estrogens in the peripheral tissues. There are two types of aromatase inhibitors, irreversible steroidal activators and reversible nonsteroidal imidazole-based inhibitors. Although both types interfere with the final step in estrogen biosynthesis, they do so by different mechanisms. Steroidal agents, such as exemestane, have an androgen structure and compete with the natural aromatase substrate androstenedione; they bind irreversibly to the catalytic site of aromatase causing loss of enzyme activity, and more aromatase enzyme must be produced before estrogen biosynthesis can resume. Therefore, steroidal agents are often referred to as suicide inhibitors.(407)

Each of the third-generation aromatase inhibitors has been compared with megestrol acetate and tamoxifen in women with advanced disease and each is being evaluated for use in adjuvant therapy, neoadjuvant therapy, and for prevention. The two studies comparing anastrozole efficacy with that of megestrol acetate did not report a statistically significant difference in key end points between anastrozole (1 mg daily) and megestrol acetate (160 mg daily), although results for each end point were numerically superior for anastrozole. In one prospective randomised trial two doses of anastrozole (1 and 10 mg orally once daily) were compared with megestrol acetate (40 mg orally four times daily) in postmenopausal patients with advanced breast cancer who progressed after prior tamoxifen therapy. All patients were analysed for efficacy as randomised (intention to treat) and for tolerability as per treatment received. Of the 378 patients who entered the study, 135 were randomised to anastrozole 1 mg, 118 to anastrozole 10 mg, and 125 patients to megestrol acetate. After a median follow-up of 192 days, response rate which included complete response, partial response and patients who had disease stabilisation for 6 months or more was 34% for anastrozole 1 mg, 33.9% for anastrozole 10 mg and 32.8% for megestrol acetate.(408) In the second trial, Patients were randomly assigned to receive anastrozole, 1 mg (n = 128); anastrozole, 10 mg (n = 130); or megestrol acetate (n = 128). With a median duration of follow-up of 6 months, there was no statistical evidence of a difference between either 1 or 10 mg doses of anastrozole and megestrol acetate for any efficacy endpoint. According to rigid response criteria, 10%, 6%, and 6% of patients in the anastrozole 1 mg, anastrozole 10 mg, and megestrol acetate groups, respectively, had an objective response (complete response or partial response) and 27%, 24%, and 30% of patients in the respective groups had stable disease for a duration of 24 weeks or longer. Quality-of-life assessments revealed that anastrozole in a 1-mg dose was associated with better physical scores and anastrozole in a 10-mg dose with better psychologic scores than megestrol acetate.(409) In a subsequent pooled analysis of these two trials conducted at a median follow-up of 31 months, a statistically significant survival advantage was found for anastrozole. At the clinical dose of 1 mg daily, anastrozole demonstrated a statistically significant survival advantage over megestrol acetate, with a hazard ratio of 0.78 ( $P < 0.025$ )(0.60 < 97.5% confidence interval [CI] < 1.0).



The 1 mg anastrozole group also had a longer median time to death (26.7 months) compared with 22.5 months for the megestrol acetate group. The 10 mg anastrozole group also had a survival benefit over the megestrol acetate group, with a hazard ratio of 0.83 (P=0.09, not significant)(0.64 < 97.5% CI < 1.1). Higher 2-year survival rates were observed for both anastrozole treatment groups than for the megestrol acetate group (56.1%, 54.6%, and 46.3% for the groups given 1 mg anastrozole, 10 mg anastrozole, and megestrol acetate, respectively).(410)

In comparative studies with tamoxifen, each of the third-generation aromatase inhibitors demonstrated clinical efficacy in postmenopausal women with advanced breast cancer. Anastrozole was compared with tamoxifen in two studies. In the first study, anastrozole 1 mg once daily was compared to tamoxifen 20 mg once daily in patients with hormone receptor-positive tumors or tumors of unknown receptor status who were eligible for endocrine therapy. Primary end points were objective response (OR), defined as complete (CR) or partial (PR) response, time to progression (TTP), and tolerability. Anastrozole was as effective as tamoxifen in terms of OR (21% v 17% of patients, respectively), with clinical benefit (CR + PR + stabilization > or = 24 weeks) observed in 59% of patients on anastrozole and 46% on tamoxifen (two-sided P = .0098, retrospective analysis). Anastrozole had a significant advantage over tamoxifen in terms of TTP (median TTP of 11.1 and 5.6 months for anastrozole and tamoxifen, respectively; two-sided P = .005). The tamoxifen:anastrozole hazards ratio was 1.44 (lower one-sided 95% confidence limit, 1.16). Both treatments were well tolerated. However, thromboembolic events and vaginal bleeding were reported in fewer patients who received anastrozole compared with those who received tamoxifen (4.1% v 8.2% [thromboembolic events] and 1.2% v 3.8% [vaginal bleeding], respectively).(411) In the second trial, a total of 668 patients (340 in the anastrozole arm and 328 in the tamoxifen arm) were randomized to treatment and followed-up for a median of 19 months. Median TTP was similar for both treatments (8.2 months in patients who received anastrozole and 8.3 months in patients who received tamoxifen). The tamoxifen:anastrozole hazards ratio was 0.99 (lower one-sided 95% confidence limit, 0.86), demonstrating that anastrozole was at least equivalent to tamoxifen. Anastrozole was also as effective as tamoxifen in terms of OR (32.9% of anastrozole and 32.6% of tamoxifen patients achieved a complete response [CR] or partial response [PR]). Clinical benefit (CR + PR + stabilization of > or = 24 weeks) rates were 56.2% and 55.5% for patients receiving anastrozole and tamoxifen, respectively. Both treatments were well tolerated. However, incidences of thromboembolic events and vaginal bleeding were reported in fewer patients treated with anastrozole than with tamoxifen (4.8% v 7.3% [thromboembolic events] and 1.2% v 2.4% [vaginal bleeding], respectively).(412)

In a combined analysis, including 1021 postmenopausal women, at a median duration of follow-up of 18.2 months, anastrozole was at least equivalent to tamoxifen in terms of median TTP (8.5 and 7.0 months, respectively; estimated hazard ratio [tamoxifen relative to anastrozole], 1.13 [lower 95% confidence level, 1.00]). In a retrospective subgroup analysis, anastrozole was superior to tamoxifen with respect to TTP (median values of 10.7 and 6.4 months for anastrozole and tamoxifen, respectively, two-sided P = 0.022) in patients with estrogen and/or progesterone receptor positive tumors (60% of combined trial population). In terms of objective response, 29.0% of anastrozole and 27.1% of tamoxifen patients achieved either a complete response (CR) or a partial response (PR). Clinical benefit (CR + PR +



stabilization of  $\geq 24$  weeks) rates were 57.1% and 52.0% for anastrozole and tamoxifen, respectively. Both anastrozole and tamoxifen were well tolerated. Anastrozole led to significantly fewer venous thromboembolic ( $P = 0.043$ ; not adjusted for multiple comparisons) events, and vaginal bleeding was reported in fewer patients treated with anastrozole than with tamoxifen.(413)

Based on these data, and the data on the adjuvant use of anastrozole, summarized in chapter 2.5, the sequential use of 2 years of Tamoxifen, followed by 3 years of anastrozole is justified as endocrine treatment for all postmenopausal, hormone receptor positive patients. This treatment is also in accordance to the American Society of Clinical Oncology Technical Assessment: 'Optimal adjuvant hormonal therapy for a postmenopausal woman with receptor positive breast cancer includes an aromatase inhibitor as initial therapy or after treatment with Tamoxifen.'(414) The sequential scheme of endocrine treatment will be complementary to randomization of 2 years vs. 5 years of zoledronate treatment, and will, therefore, give, in addition to the primary endpoint of this study, also yield the possibility to study the effects of anastrozole treatment with and without concomitant bisphosphonate treatment, particularly in respect to skeletal events.

#### 5.6.1.8 Zoledronate

By selectively binding to calcium-ions, there is an enrichment of bisphosphonates in the bone, especially in resorptive areas, where calcium is most exposed. The positive effects of these substances were first ascribed to stabilization of the mineral bone matrix due to prevention of hydroxyapatite crystal solution by a physicochemical mechanism. It seems clear that the inhibition of osteoclasts is one of the major mechanisms of action of these drugs. Due to a high resorptive potency of active osteoclasts, bisphosphonates are internalized from the resorption lacuna. By a so far not entirely clarified mechanism, the substances get into the cytoplasm, where they are able to disturb several functions of the osteoclasts:(415)

Disruption of the actin cytoskeleton; especially the actin-ring, necessary to adhere and to form the lacuna cannot be formed properly. This can be reversible at low BP-concentrations.

Loss of the ruffled border, the site of excretion of hydrogen ions and resorption.

Disruption of intracellular signalling by integrins.

Induction of apoptosis of osteoclasts

It is known, that amino-bisphosphonates block the mevalonate-pathway of different cell types. Therefore, many of the before mentioned effects are ascribed to this basic action: It results in a missing of prenyl residues, that are necessary for posttranslational modification of small GTP-binding proteins (sG-proteins). Those proteins are necessary for cell signaling and therefore essential for many cellular functions.(415) This hypothesis is supported by the fact, that most of the deleterious effects of bisphosphonates can be abrogated in vitro by geranylgeraniol, the substrate for prenylating sG-proteins. In addition, similar effects on osteoclasts like those of bisphosphonates can be induced by statins, drugs usually utilized to reduce serum-cholesterol, that block the HMGCoA-reductase, an early enzyme of the mevalonate pathway.

Non-Amino-Bisphosphonates seem to act different: they do not disturb the mevalonate-pathway, but can be metabolized to non-hydrolysable ATP-analogs, which compete with ATP and thereby as well block several important cellular



functions.(416)

As macrophages are closely related to osteoclasts and display a similar resorption ability,(417) it is conceivable, that the function of those cells might be disturbed by bisphosphonates as well. Apart from the induction of apoptosis, incubation of macrophages or monocytes with bisphosphonates alters cytokine release and surface molecule expression including antigen-presentation.(418)

Bisphosphonates also influence osteoblasts: those antagonistic cells can release substances, that inactivate osteoclasts. This can be initiated and increased by bisphosphonates, even after short-time incubation of 5 min.(415)

In the last few years there has been increasing evidence, that there are much more and various effects of bisphosphonates, than presumed in the past decades. The interest in this context is focused on direct effects on tumor cells. Bisphosphonates exert a toxic effect on tumor cells and induce apoptosis in myeloma,(419) prostate cancer(420) and in breast cancer cells.(421) This effect shows synergy with commonly utilized cytostatic substances like dexamethasone or paclitaxel, as well as with antihormones like tamoxifen.(422;423) The mechanism of action is probably similar to those in osteoclasts, described above, and equally different for amino- and non-amino-bisphosphonates.(416)

In addition it could be shown, that the adhesion of tumor cells on bone matrix can be inhibited by bisphosphonates.(424) This was shown as well for preincubated bone matrix with untreated tumor cells as vice versa. The exact mechanism for this inhibition is not entirely understood, but it can be assumed, that bisphosphonates interfere with the interaction of cell-surface –adhesion –molecules like integrins and bone matrix.

Bisphosphonates differ by substitution of active side chains on their phosphorous - carbon - phosphorous structural backbone.(425) First generation bisphosphonates (etidronate and clodronate) have alkyl or halide side chains. The second generation bisphosphonates (pamidronate disodium / Aredia® and alendronate) are characterized by a side chains with an amino terminal group and have an increased antiresorptive potency of 10-100 times the previous generation.(425) Zoledronic acid, a 3rd generation bisphosphonate, is 2-(imidazol-1-yl-hydroxyethane-1, 1-bisphosphonic acid) in the form of its monohydrate. This compound is characterized by a side chain consisting of an imidazole ring group. Zoledronic acid is a more potent inhibitor of osteoclasts than earlier bisphosphonates. In the 1,25-dihydroxyvitamin D3-induced in vivo hypercalcemia model of thyroparathyroid ectomized rats, Zoledronic acid is 850 times more potent than pamidronate and more than four orders of magnitude more potent than either clodronate or etidronate.(426) In addition, zoledronic acid is two orders of magnitude more potent than pamidronate in inhibiting the release of calcium from mouse calvaria in vitro irrespective of the stimulus [1,25(OH)2D3, PTH, PTHrP, prostaglandin-E2, or IL-1B]. Zoledronic acid has little effect on bone mineralization in vitro, and this drug has the largest therapeutic ratio between the desired inhibition of calcium resorption and the unwanted inhibition of mineralization in vitro of all the bisphosphonates.(426) Zoledronic acid has been approved in Europe and the US for the treatment of bone metastases in a broad range of tumors and for the treatment of malignancy-related hypercalcemia.

Side effects of bisphosphonates differ according to whether administration is oral or intravenous. Bisphosphonates are poorly bioavailable reaching only a few percent





even with oral bisphosphonates such as clodronate, the result of their low lipophilicity and chelation by calcium. Gastrointestinal side-effects are frequent with nausea, dyspepsia, vomiting, gastric pain, diarrhea and even ulceration. These can be alleviated by taking water and remaining upright to minimize esophageal reflux. Given in excessive amounts bisphosphonates will inhibit normal calcification. The therapeutic window and modalities of administration are an important feature defining the use of the different bisphosphonates.(427;428) Zoledronic acid has little effect on bone mineralization in vitro. In rat models, the rapid absorption and adherence of Zometa® (zoledronic acid) to bone results in its quick and complete elimination from the circulation. Gastrointestinal absorption of zoledronic acid is poor, and does not exceed 5% of a dose of 1.5 mg/kg. The drug is not metabolized, and is cleared rapidly from the circulation and excreted completely via the kidneys within 24 hours. Zoledronic acid therefore has the largest therapeutic ratio between the desired inhibition of calcium resorption and the unwanted inhibition of mineralization in vitro characteristic of all bisphosphonates.(426)

The parenteral administration of nitrogen-containing bisphosphonates can initially be accompanied by a transient low-grade fever accompanied sometimes by flu-like symptoms. The major risk with intravenous bisphosphonate administration is that of renal failure consequent to the formation of deposits after an over-rapid injection. Renal side-effects can be avoided by slow intravenous infusion with adequate fluid volumes. To date, zoledronic acid ( 4 mg as 15-minute infusion) has been given intravenously to more than 500.000 patients and has been generally well tolerated. In trials of treatment for bone metastases, 9 to 15 percent of patients who received 4 mg of zoledronic acid over a 15-minute period had renal deterioration, defined by elevations in the serum creatinine level.(429) This rate was comparable to the rate of renal deterioration among patients in the placebo groups of the same trials (6.7 to 11.5 percent) confirming the increased baseline risk of renal deterioration, including renal failure, in patients with advanced or metastatic cancer.(429) Because of intravenous bisphosphonates have been associated with a risk of renal deterioration, regular monitoring of renal function, adequate hydration and discontinuation of treatment if renal function deteriorates are recommended.

#### **5.6.1.9 Goserelin**

Goserelin is a gonadotropin-releasing hormone (GnRH) agonist. Continuous pituitary stimulation by GnRH, normally under pulsatile control, leads to an eventual downregulation of LH and FSH secretion with subsequent diminution of androgen levels. During the first weeks of therapy an initial LH and FSH release may occur. Goserelin lowers serum estradiol to postmenopausal levels. Goserelin is well tolerated both locally and systemically. It produced effective castration and the objective response rates and duration of remission are at least comparable to those seen following oophorectomy; however, the side effects are less. The use of depot goserelin avoids the psychological trauma and operative morbidity of the irreversible operative castration.(430) Amenorrhea and hot flashes (75 %) are common adverse effects of goserelin therapy. Peripheral edema with worsening congestive heart failure have been described.(431)(394)



## 5.6.2 Toxicity, Dosage Selection and Interval Modification

### 5.6.2.1 Hematological Toxicity

Hematological toxicities will be graded according to the Common Toxicity Criteria of the National Cancer Institute (CTC, Version 3.0) as depicted in the relevant section of this protocol.

The WBC (white blood count) must be  $\geq 3.0 \times 10^9/l$  and the platelet count  $\geq 100 \times 10^9/l$  prior to the beginning of the treatment. In case of required delay, the patient should have blood count checked at least twice per week and retreated as soon as sufficient recovery has been achieved.

Primary prophylactic application of G-CSF is no more recommended for the regimens in this trial today.(432) However, in order to achieve sufficient dose intensity and to prevent infections, G-CSF (Granocyte®) should be applied as secondary prophylaxis in the following cases:

- Febrile neutropenia (i.e. temperature  $>38.5 \text{ }^\circ\text{C}$ , ANC  $< 0.5 \times 10^9/l$ , requiring hospitalization and intravenous antibiotics)
- neutropenia (ANC  $< 0.5 \times 10^9/l$ ) for more than 5 days
- severe neutropenia (ANC  $< 0.1 \times 10^9/l$ )
- prolongation of the time interval due to insufficient leucocytes or neutrophils

G-CSF as secondary prophylaxis should be given in all the following courses on **day 5 – 10**, or until leucocytes have reached  $5.0 \times 10^9/l$  after crossing the nadir.

Concerning the application of G-CSF, please see also the relevant section.

In case of the following hematological toxicities despite secondary prophylactic application of G-CSF, doses will be reduced successively by one dose level in case of

- ANC  $< 0.5 \times 10^9/l$  for more than 5 days
- Febrile neutropenia (i.e. temperature  $>38.5 \text{ }^\circ\text{C}$ , ANC  $< 0.5 \times 10^9/l$ , requiring hospitalization and intravenous antibiotics)
- Thrombocytopenia grade 4
- Prolongation of the time interval due to insufficient leucocytes or neutrophils and/or platelets

### 5.6.2.2 Non-hematological Toxicity

Non-hematologic toxicities will be graded according to the Common Toxicity Criteria of the National Cancer Institute (CTC, Version 3.0) as depicted in the relevant section of this protocol.

Patients with a grade 0-2 toxicity other than a hematologic toxicity will receive the full dose of therapy on time.

Neurological toxicity: NCI-grade 2: dose reduction 1 level

NCI-grade  $>2$ : removal from study

Gastrointestinal toxicity: *Mucositis:*

NCI-grade 3: dose reduction 1 level

*Mucositis or vomiting:*



NCI-grade 4: removal from study

Cardiac toxicity: AV-blockage 1<sup>st</sup> grade, asymptomatic bradycardia, isolated asymptomatic ventricular extrasystoles: treatment continuation under cardiac monitoring

Arrhythmias requiring treatment, AV-blockage 2<sup>nd</sup> or 3<sup>rd</sup> grade, reduction of LVEF of >20%/or >10% and below the clinic's normal range: removal from study

Pulmonary Toxicity (in special respect to Gemcitabine)

If pneumonitis grade 2 or higher develops in a given cycle and is related to gemcitabine, gemcitabine should be promptly discontinued and the patient should be removed from protocol treatment. Treatment with corticosteroids should be given according to established guidelines.

For patients who develop other grade 3 non-hematologic toxicity, the decision to have their treatment reduced to 75 % or withheld will depend on the course that is medically most sound in the judgment of the investigator.

Patients who develop a grade 4 non-hematologic toxicity that is judged to be life-threatening will be removed from the study.

For subsequent cycles, doses will be reduced successively by one dose level in case of the above mentioned toxicities.

A patient will be discontinued from the study if the beginning of a given cycle has to be postponed due to toxicity for more than 2 weeks, unless approved by the study coordinator group. In this case, the dose will be reduced by one dose level.

### 5.6.2.3 Dosage Adjustments

#### 5.6.2.3.1 Dosage Adjustment Levels for **Randomization A**

The following dosage adjustment levels will be considered for randomization A:

| Dose Level             | 0                      | -1                    | -2                    |
|------------------------|------------------------|-----------------------|-----------------------|
| Fluorouracil           | 500 mg/m <sup>2</sup>  | 400 mg/m <sup>2</sup> | 300 mg/m <sup>2</sup> |
| Epirubicin             | 100 mg/m <sup>2</sup>  | 80 mg/m <sup>2</sup>  | 60 mg/m <sup>2</sup>  |
| Cyclophosphamide       | 500 mg/m <sup>2</sup>  | 400 mg/m <sup>2</sup> | 300 mg/m <sup>2</sup> |
| Docetaxel (Arm AA)     | 75 mg/m <sup>2</sup>   | 60 mg/m <sup>2</sup>  | 45 mg/m <sup>2</sup>  |
| Docetaxel (Arm AB)     | 100 mg/m <sup>2</sup>  | 80 mg/m <sup>2</sup>  | 60 mg/m <sup>2</sup>  |
| Gemcitabine (each day) | 1000 mg/m <sup>2</sup> | 800 mg/m <sup>2</sup> | 600 mg/m <sup>2</sup> |

Further dose reductions would result in an ineffective therapy. Therefore, patients requiring further dose reductions have to be discontinued from the study.

#### 5.6.2.3.2 Dosage Adjustment Levels for **Randomization B**



The dose of Zoledronate in patients with baseline **creatinine clearance > 60 mL/min** is **4 mg** infused over no less than 15 minutes.

**Dose modifications in patients with mild to moderate renal impairment (creatinine clearance ≤ 60 mL/min) at baseline:** Upon treatment initiation, the Zoledronate doses for patients with reduced renal function (mild and moderate renal impairment) are listed in the following table. These doses are calculated to achieve the same AUC as that achieved in patients with creatinine clearance of 75 mL/min. Creatinine clearance (CrCl) is calculated using the Cockcroft-Gault formula:

$$\text{CrCl} = \frac{140 - \text{age}(\text{years}) * \text{weight}(\text{kg}) * 0,85}{72 * \text{serum} - \text{creatinin}(\text{mg} / \text{dl})}$$

| <b>Baseline Creatinine Clearance (mL/min)</b> | <b>Zoledronate Recommended Dose*</b> |
|-----------------------------------------------|--------------------------------------|
| >60                                           | 4.0 mg                               |
| 50 - 60                                       | 3.5 mg                               |
| 40 -49                                        | 3.3 mg                               |
| 30 - 39                                       | 3.0 mg                               |

\*Doses calculated assuming target AUC of 0.66(mg•hr/L) (CrCl=75mL/min)

#### 5.6.2.4 Interval Modification

The cytostatic treatment of a patient can be postponed for up to 2 weeks if she has not recovered from hematological and/or non-hematological toxicity at the beginning of a cycle (day 1).

The following items must be fulfilled:

- neutrophiles ≥ 1.5 x 10<sup>9</sup>/l or leucocytes ≥ 2.0 x 10<sup>9</sup>/l
- platelets ≥ 100 x 10<sup>9</sup>/l

The treatment will be restarted immediately after recovery.

A patient will be discontinued from the study if the beginning of a given cycle has to be postponed due to toxicity for more than 2 weeks, unless approved by the study coordinators.

In this case, the dose will be reduced by one dose level.

In case these requirements are not achieved, frequent laboratory controls are recommended as well as interval prolongation for up to 1 week (no application of G-CSF immediately before chemotherapy!).

Serum creatinine should be monitored in all patients treated with Zoledronate prior to each dose. A two weeks window for checking creatinine is allowed prior to the next dose. Elevations in serum creatinine above baseline values may necessitate a delay in treatment.



The serum creatinine result should be evaluated according to the following criteria:

- If the patient's baseline serum creatinine was  $< 1.4$  mg/dl at the time of study entry, an increase of 0.5 mg/dl or more will require the delaying of the dose of study drug until the patient's serum creatinine returns to no higher than 10% above the baseline value.
- If the patient's baseline serum creatinine was  $\geq 1.4$  mg/dl, then any increase in the serum creatinine of 1.0 mg/dl or more will require that the study drug be delayed until the patients serum creatinine returns to no higher than 10% above the baseline value.
- Any doubling of the baseline serum creatinine value will require that the study drug be delayed until the patient's serum creatinine returns to no higher than 10% above the baseline value.

**Zoledronate should be re-initiated at the same dose as that prior to treatment interruption**

## 5.7 Endocrine Therapy

All patients with positive hormone receptor status ( $\geq 10$  % positively stained cells for estrogen and/or progesterone) on the primary tumor will receive endocrine treatment. Patients with positive hormone receptor status ( $\geq 10$  % positively stained cells for estrogen and/or progesterone) of the primary tumor will receive **tamoxifen** treatment 20 mg p.o. per day for 2 years, after the end of chemotherapy. Postmenopausal patients with positive hormone receptor status will be treated subsequently with **anastrozole** (Arimidex®) 1 mg p.o. for additional 3 years, premenopausal patients will continue tamoxifen treatment for additional 3 years. In case of contraindications against tamoxifen or severe adverse effect during the treatment with tamoxifen, anastrozole will be given before the end of the initial 2 years. In addition to tamoxifen, all patients with positive hormone receptor status of the primary tumor and under the age of 40 or restart of menstrual bleeding within 6 months after the completion of cytostatic treatment or with premenopausal hormone levels as defined below will receive **goserelin** (Zoladex®) 3.6 mg subcutaneously every 4 weeks over a period of 2 years.(2;3) Premenopausal endocrine status will be assumed, if the following serum levels are met: LH  $< 20$  mIE/ml, FSH  $< 20$  mIE/ml and  $E_2 > 20$  pg/ml. Endocrine therapy will start after the end of chemotherapy. Ovarian protection with an GnRH-agent during chemotherapy in hormone receptor negative patients within the ZORO-Study will be allowed.

## 5.8 Radiotherapy

All patients with breast conserving therapy or at least 4 axillary lymph node metastases will receive adjuvant **radiotherapy** following the completion of the



systemic cytotoxic treatment. If necessary to meet patients' needs or for logistic reasons, the radiotherapy may also be administered intermittently following the completion of 50 % of the cytotoxic treatment.

The optimal **sequencing** of chemotherapy and adjuvant radiotherapy cannot be determined from available evidence in literature. The expert consensus of the ASCO 2001 Panel(157) was that chemotherapy should be started soon after surgery, and hence the start of chemotherapy should not be delayed until after adjuvant radiotherapy. However, in cases in which prolonged chemotherapy regimens are used, the panel could not reach consensus on whether it was better to use a "sandwich" approach or deliver all chemotherapy before adjuvant radiotherapy or to give concurrent chemoradiotherapy. There are few data defining the optimal sequencing of chemotherapy and adjuvant radiotherapy. The interval between surgery and the start of radiotherapy may affect the risk of local recurrence. At the University of Washington in Seattle, the 8-year actuarial risk of local recurrence among 19 patients beginning radiotherapy within 6 months of initial diagnosis was 5%, compared with 23% among 35 patients beginning radiotherapy more than 6 months after diagnosis.(433) On the other hand, delaying chemotherapy in favor of irradiation might increase the risk of distant failure. In a trial of the sequencing of chemotherapy and radiotherapy in patients treated with breast-conserving therapy at the Joint Center for Radiation Therapy (JCRT) and affiliated institutions, freedom from distant failure and overall survival rates were higher in patients randomized to receive chemotherapy before radiotherapy, rather than radiotherapy followed by chemotherapy.(434)

Therefore, it will be allowed to give the adjuvant therapeutic irradiation after completing of half of the cytostatic treatment (3 cycles of chemotherapy, 'sandwich therapy'), or after the full completion of the chemotherapy. In case of sandwich therapy, the chemotherapy will have to be halted for the duration of the intermittent radiotherapy. The subsequent cytostatic treatment will have to commence no later than 14 days after the completion of the radiotherapy. It will be required to abide to the initial commitment for the timing of radiotherapy in each patient.

The **chest wall** is the site at greatest risk of recurrence in patients undergoing mastectomy. Irradiation of the chest wall not only reduces the risk for local recurrence significantly, but also improves the overall survival significantly in patients with locoregionally advanced disease.(435) (148)Therefore, the irradiation of the chest wall following mastectomy will be mandatory **for all patients with at least 4 axillary lymph node metastases**

or with **one of the following conditions:**

- T3/T4-carcinoma
- T2-carcinoma > 3 cm
- multicentric tumor growth
- lymphangiosis carcinomatosa or vessel involvement
- involvement of the pectoralis fascia or a safety margin < 5 mm
- R1- or R2 resection.(4)



and will be performed with high energy photons using tangential opposition beams. Telecobalt irradiation will be permitted. The suggested single dose will be 1.8 Gy (five times a week). The cumulative absorbed dose will be 50.4 Gy.

**Supraclavicular** nodal failures are more common in unirradiated patients with four or more positive axillary nodes. In one series, supraclavicular nodal failure appeared in 17% of unirradiated or inadequately irradiated patients (17 of 102), compared with 2% of 56 irradiated patients.(436) In another series, the risk of supraclavicular failure was 13% (6 of 46) among unirradiated patients with four or more positive nodes, compared with 4% (2 of 52) for those irradiated.(437) The appropriateness of giving supraclavicular nodal irradiation was discussed extensively by the expert consensus of the ASCO 2001 Panel,(157) and two trials (one conducted by the European Organization for Research and Treatment of Cancer, the other by the National Cancer Institute of Canada) are currently open in which patients are randomized to receive or not receive both supraclavicular and internal mammary nodal irradiation. These may someday help settle this contentious issue, but at present there are clearly substantial differences of opinion on this subject within the radiation oncology community, as well as among the panel members. Therefore, based on these considerations of morbidity and the substantial observed incidence of clinical supraclavicular failure in patients with four or more positive axillary nodes, the panel suggests that a supraclavicular field should be irradiated in all such patients. In this study, this recommendation is followed, and irradiation of the infra-/supraclavicular lymphnode area will be required **for all patients with at least 4 axillary lymph node metastases**. The suggested single dose will be 1.8 Gy (five times a week). The cumulative absorbed dose will be 50.4 Gy.

**Radiotherapy following breast conserving** therapy will comprise the irradiation of the breast, using tangential opposition beams. The suggested single dose will be 1.8 Gy (five times a week). The cumulative absorbed dose will be 50.4 Gy.

There is insufficient evidence to assume that patients might benefit from **axillary** irradiation. In a series from Lund, Sweden, no axillary failures were seen among either 46 unirradiated or 52 irradiated patients with four or more positive nodes.(437) In a small series of patients who underwent high-dose chemotherapy after complete dissection which revealed 10 or more positive nodes, there was no difference in axillary failure rates whether a supraclavicular field or full axillary field was treated.(438) Therefore, the expert consensus of the ASCO 2001 Panel(157) suggests that axillary radiotherapy not be given routinely to patients undergoing complete or level I/II axillary dissection. Following this suggestion, irradiation of the axillary lymph nodes will not be permitted in this study.

There is insufficient evidence to make recommendations on whether **internal mammary** nodal irradiation should or should not be used in this study. One of the most controversial issues regarding adjuvant radiotherapy in breast cancer is the treatment of the internal mammary nodes. In older studies, the incidence of internal mammary node metastases was approximately 10% in patients with a negative axillary dissection and 20% to 50% in patients with a positive dissection.(439;440) More recent studies tend to show lower risks of involvement.(441;442) However, clinical recurrence in internal mammary nodes in patients with positive axillary nodes is rare in most series, even when radiotherapy is not given.(443;444) A few randomized trials have focussed on whether internal mammary nodal treatment



improves patient outcome. Two trials showed no improvement in survival in patients who underwent internal mammary node dissection in addition to standard radical mastectomy.(439;445;446) In early 1996, the European Organization for Research and Treatment of Cancer began a trial (protocol 22922/10925) of the value of internal mammary and medial supraclavicular chain irradiation for similarly selected patients undergoing either breast-conserving surgery or mastectomy, with an accrual goal of more than 4,000 patients. A similar trial began in Canada in 2000 (open only to patients undergoing breast-conserving surgery). Therefore, there is insufficient data available to make recommendations as to whether deliberate internal mammary nodal irradiation should or should not be used, and the decision in this study will be left at the discretion of the individual investigator. However, the investigator's decision will have to be documented thoroughly in the clinical report forms.

Currently, there is also no sufficient data supporting the assumption that a **boost** dosis to the area of the primary tumor in the conservative treatment of breast cancer improves the overall survival in these patients. In a large series on 1,024 women with early breast carcinoma (< or = 3 cm in diameter), at 5 years, 10 patients of 521 who had received the boost (Kaplan-Meier estimate of local relapse rate, 3.6%) and 20 of 503 who had received no further treatment (Kaplan-Meier estimate of local relapse rate, 4.5%) had developed a local recurrence (P = .044). After adjustment for the main prognostic variables, the relative risk was still significantly lower for the boost group (0.3; range, 0.12 to 0.95). However, no differences in overall survival were reported between the two study arms.(447) Following a study on 199 patients after breast conserving surgery, Galinsky et al. conclude that a boost to the primary site is unnecessary if the margins of resection are negative.(448) Pending results of the EORTC Radiotherapy Cooperative Group trial 22881/10882 will hopefully add to the insufficient knowledge about a potential survival benefit of boost irradiation after breast conserving therapy. Because of the lack of data suggesting prognostic relevance of boost irradiation on overall survival and the randomized character of this study, the decision to apply or neglect boost irradiation will be at the discretion of the individual investigator.

Intraoperative radiotherapy may be used as boost treatment within the Targit-Study (Chair: Prof. Dr. M. Baum, London), if administered with the Intrabeam-Device (Zeiss, Germany). If a patient meets **all** inclusion criteria for the Targit-Study, and no additional whole breast radiation is necessary according to the Targit-Study protocol, no additional radiotherapy is warranted within this study.





## 5.9 Randomization

All patients will be randomized to one of the following treatments:

### First randomization **A**

**AA:** 3 cycles of 5-Fluorouracil 500 mg/m<sup>2</sup> i.v. body surface area and Epirubicin 100 mg/m<sup>2</sup> i.v. and Cyclophosphamide 500 mg/m<sup>2</sup> i.v., (FEC100), each administered on day 1, repeated on day 22, subsequently followed by 3 cycles of Docetaxel 75 mg/m<sup>2</sup> body surface area i.v. (D), and Gemcitabine 1000 mg/m<sup>2</sup> i.v. (30 min infusion) (G), administered on day 1, followed by Gemcitabine 1000 mg/m<sup>2</sup> i.v. (30 min infusion) on day 8, repeated on day 22

**AB:** 3 cycles of 5-Fluorouracil 500 mg/m<sup>2</sup> i.v. body surface area and Epirubicin 100 mg/m<sup>2</sup> i.v. and Cyclophosphamide 500 mg/m<sup>2</sup> i.v., (FEC100), each administered on day 1, repeated on day 22, subsequently followed by 3 cycles of Docetaxel 100 mg/m<sup>2</sup> body surface area i.v. (D), administered on day 1, repeated on day 22

### Second randomization **B**

**BA:** Zoledronic acid 4 mg i.v., every 3 months for the duration of two years, subsequently followed by zoledronic acid 4 mg i.v., every 6 months for the duration of additional three years

**BB:** Zoledronic acid 4 mg i.v., every 3 months for the duration of two years

Both randomizations will be performed before the start of the first treatment period. Each patient's treatment modality will be unknown until the time of randomization.

Randomization will be stratified on the baseline prognostic variable of metastatic axillary lymph node involvement and the hormone receptor status of the primary tumor, histopathological grading, menopausal status, as well as the HER2-neu Status, as described below.

For each factor the following **strata** will be formed:

- Metastatic axillary lymph node involvement:
  - No evidence of metastatic axillary lymph nodes or unknown axillary status
  - 1-3 metastatic axillary lymph nodes
  - 4-9 metastatic axillary lymph nodes vs.
  - $\geq 10$  metastatic axillary lymph nodes
- Hormone receptor status ( $\geq 10$  % positively stained cells for estrogen and/or progesterone) of the primary tumor:
  - negative vs.
  - positive
- Histopathological grading:
  - G1 vs.
  - G 2-3
- Menopausal status
  - Premenopausal



- Postmenopausal
- HER2-neu Status
  - Positive
  - Negative
  - Unknown

The randomization is performed by fax or electronically via Internet by the appointed CRO, as specified on the title pages of this protocol. The recruitment period for this study is scheduled for the duration of 5 years. Participating study centers will be obliged to enroll at least 10 patients per year.

The patient numbering is performed by the CRO. Patient numbers have four digits. Consecutively numbering is done, starting with 001. The randomization lists are kept at the CRO.

In case of questions to the randomization procedure, please contact the CRO via the contact options outlined on the front pages of this protocol.

In case of clinical questions (e.g. inclusion / exclusion criteria), please contact the study office:

**Frauenklinik Innenstadt, Klinikum der LMU München, Maistr. 11, 80337  
München**

**SUCCESS-Study Office**

**Fr. Dr. B. Rack, PD Dr. W. Janni, Prof. Dr. H. Sommer**

**Phone: ++49-89-5160-4111/4170**

**Fax: ++49-89-5160-4547**

**eMail: [SUCCESS@med.uni-muenchen.de](mailto:SUCCESS@med.uni-muenchen.de)**

## **5.10 Blinding**

This is an open-label, randomized study not requiring blinding. Blinding in a randomized study involving different cytostatic regimen would not be feasible as of the circumstances of the treatment modality. Therefore the identity of the treatment will be known to the investigator and patient.



## 5.11 Concomitant Therapy

Full supportive care (for example transfusions or antibiotics) will be given and recorded on the case report form. An effective anti-emetic treatment is recommended (compare relevant section).

No other cytotoxic or other anti-neoplastic treatment other than specified in this protocol will be permitted while the patients are in the study. Any disease progression requiring other forms of specific anti-tumor therapy will be a cause for discontinuation in this study.

### 5.11.1 G-CSF

Granulocyte Colony Stimulating Factor (G-CSF) is a haematopoietic growth factor suitable for the prophylaxis and therapy of serious cytopenia associated with cytostatic therapy.(449) Following the application of G-CSF, an increase especially in neutrophil granulocytes after 6-12 hours can be observed. This effect is mainly achieved by emptying the pools of granulocytes in the bone marrow and by a prolongation of the life cycle of granulocytes. Granulocytes in the peripheral blood, which had been stimulated by G-CSF usually have a normal or higher cellular function. A significant effect on the erythropoiesis or the thrombopoiesis has not been proven. The expected side effects of G-CSF application include feelings of general sickness, muscle and joint pain, fever, minor increase of liver enzymes and exanthema in the area of injection. The above mentioned symptoms are usually easily cured through a therapy using Paracetamol.

The use of G-CSF in non-neutropaenic infection is based on three possible mechanisms of action:

- (1) enhanced chemotaxis, superoxide production and killing activity
- (2) immunomodulation of the cytokine response in sepsis
- (3) a possible increase in intracellular uptake of antibiotics

Two granulocyte colony stimulating factors (G-CSFs) are available for clinical use in Europe: filgrastim (Neupogen<sup>®</sup>) and lenograstim (Granocyte<sup>®</sup>). The purpose of this literature review is to study how they differ, the clinical implications of these differences (especially in terms of efficacy) and the economic impact of these differences. From a chemical point of view the two molecules are not identical. (450-453) Their amino acid sequence is different and one is glycosylated, whereas the other is not. The important question to ask is what these structural differences mean for the patient. It appears that glycosylation has important consequences in terms of efficacy. Several recent comparative studies, both in vitro and in vivo, in animals and in humans, reinforce this idea which was often shared intuitively by physicians. In economical terms, in hospitals where the exact dosages are used (150 µg/m<sup>2</sup> or 19.2 million units (MU)/m<sup>2</sup> for Granocyte, and 5 µg/kg or 0.5 MU/kg for Neupogen), the choice of G-CSF must be made according to the daily cost of treatment which, for an average patient, means comparing the price of 325 µg of Neupogen and of 255 µg of Granocyte.

The G-CSF used in this study will be Lenograstim (**Granocyte<sup>®</sup>**) All the study results



point in the same direction, demonstrating the significance of glycosylation as much in terms of efficacy as of quality of response.(454) The results observed in vitro (which generally speaking must be considered with caution) confirm and, in part, explain the differences in efficacy observed in humans. It should be noted that the international studies published, which all support Granocyte, compare the two products in a therapeutic situation, and on criteria which are easily measurable and very standardized, and do not take into consideration criteria such as the duration of hospital stay, the incidence of neutropenia or the consumption of antibiotics.

### **5.11.2 Oral antibiotic prophylaxis**

As there is an expected high rate of neutropenia grade 3 and 4 in both arms, the application of oral prophylactic antibiotics should be considered. The reported toxicity of the control arm (PACS 01) includes febrile neutropenia in 4.6% of the patients.(49) However, the position of the use of oral antibiotic prophylaxis in myelotoxic chemotherapy regimen remains undefined. There is no general recommendation and the risk of antibiotic resistance should be seriously taken into consideration. Thus, the decision whether to apply such prophylaxis is given to the discretion of the investigator.

We therefore only recommend oral prophylactic antibiotics if the patient's neutrophil granulocytes are  $< 0,5 \times 10^9/l$ , with or without application of G-CSF. Possible antibiotic drugs in this setting are levofloxacin (Tavanic®) 500 mg p.o. once a day or ciprofloxacin (Ciprobay®) 500 mg p.o. twice a day, respectively.

**If the patient develops fever, especially around the expected nadir of the neutrophil granulocytes, hospitalization and application of intravenous antibiotics are absolutely necessary! No oral antibiotic treatment may be started in febrile neutropenia.**

### **5.11.3 5-HT<sub>3</sub>-Receptorantagonists and Glucocorticoids**

Little more than a decade ago, chemotherapy induced emesis was considered the most negative, unwanted side effect of cytostatic therapy, reducing substantially the quality of life of the patients. Exhausting episodes of emesis were often a limiting factor in the promise of the therapeutic success. Because of the use of highly emetogenic chemotherapeutic agents, special attention should be paid to the antiemetic therapy in this study.

5-HT<sub>3</sub>-receptorantagonists, as opposed to the conventional antiemetics (e.g. Metoclopramid), are superior both in their efficacy as well as in their spectrum of adverse effects. Since the successful separation of 5-HT<sub>3</sub>-receptorantagonists from other serotoninreceptorantagonists at the end of the 1970's, three of 5-HT<sub>3</sub>-receptorantagonists have been registered in Germany. The clinical efficacy of 5-HT<sub>3</sub>-receptorantagonists is achieved by the mutual blockage of the peripheral and central serotoninreceptors. A further advantage of using 5-HT<sub>3</sub>-receptorantagonists in contrast to conventional antiemetics is the lack of tachyphylaxia. One can expect a decrease in the total control of emesis during several treatment cycles, but still far less than with Metoclopramid.(455)

Among the available registered products that can be used for antiemesis, Navoban® (active ingredient: Tropisetron, 5 mg) has been chosen since it has been evaluated



most comprehensively in highly emetic treatments.(456)

In this study, the antiemetic agent is intravenously given 15 min. before the application of the initial cytostatic agent in order to guarantee maximal blockage of the receptors. Further applications (p.o. or i.v.) follow over the first days after chemotherapy, as long as needed.

Several studies have proven a significant increase in the tolerance of cytostatic agents and in the antiemetic efficacy of 5-HT<sub>3</sub>-receptorantagonists, when combined with glucocorticoides.(457;458) Therefore 8 mg Fortecortin® i.v. (active ingredient: Dexamethason) should be applied before the cytostatic application as well as 4 mg of Fortecortin® p.o. twice a day during the following 2-3 days, if needed. However, the immunosuppressive effect of glucosteroids should be considered.

#### **5.11.4 Premedication with Docetaxel**

In order to prevent nausea/vomiting and especially to reduce the docetaxel related tendency to develop fluid retention, the following dexamethason application scheme should be followed:

Day before chemotherapy: Dexamethason (Fortecortin, e.g.) 8 mg p.o. twice a day

Day of chemotherapy: Dexamethason 8 mg i.v. 15 min. before chemotherapy

Day after chemotherapy: Dexamethason 8 mg p.o. at night  
Dexamethason (Fortecortin, e.g.) 8 mg p.o. twice a day

### **5.12 Efficacy and Safety Evaluations**

#### **5.12.1 Efficacy**

##### **Examinations during the study**

*No more than 2 weeks before enrolling into the study*, the disease status of each patient will be assessed with the following procedures:

- Medical history and physical examination, including measurements of height and weight.
- Evaluation of performance status (ECOG scale).
- Quality of Life (QoL) questionnaires EORTC QLQ-C30 and QLQ-BR23 completed by the patient, not to be repeated before the first cycle of therapy.
- Electrocardiography (EKG)
- Laboratory tests:
  1. Hemoglobin, WBC, neutrophils and platelets (differential blood count)
  2. Bilirubin, liver enzymes (GOT,GPT), gamma-GT, creatinine, potassium, sodium, PTT, INR, albumine and protein.
  3. Pregnancy test in premenopausal women

*No more than 5 weeks before enrolling into the study*, each patient will be assessed by the following radiological tests:

- Chest x-ray (two dimensional)
- Whole body bone scan



- Ultrasound of the liver

At the stated intervals during the study, efficacy will be examined in each patient by the following evaluations:

- *1- 2 x per week (whole duration of chemotherapy):*
  - white blood count
- *Before every therapy cycle:*
  - Limited medical history and physical examination, including toxicity assessment.
  - Weight measurements.
  - Clinical laboratory tests mentioned in points 1-2 above (exclusive PTT, INR, albumine and protein, if not clinically relevant)
  - Type and number of units required for transfusions at every cycle
  - Toxicity rating using the NCI CTX scale
  - Performance status evaluation.
  - QoL EORTC QLQ-C30 and BR23 by the patient before chemotherapy is administered and other assessments are discussed with the patient (only before course 5 in Arm A and course 4 in Arm B)
- *4 weeks after the last application of chemotherapy.*
  - Clinical laboratory tests mentioned in points 1-2 above
  - QoL EORTC QLQ-C30 and BR23 by the patient
  - Limited medical history and physical examination, including toxicity assessment.
  - Evaluation of performance status (ECOG scale).
- *6 weeks after the end of radiotherapy:*
  - QoL EORTC QLQ-C30 and BR23 by the patient
  - Limited medical history and physical examination, including toxicity assessment.
  - Evaluation of performance status (ECOG scale).
- *6 months after the last application of chemotherapy.*
  - QoL EORTC QLQ-C30 and BR23 by the patient
  - Limited medical history and physical examination, including toxicity assessment.
  - Evaluation of performance status (ECOG scale).

A summarized schedule of necessary examinations can be found in the appendix of this protocol.

#### 5.12.1.1 Efficacy Criteria

A panel of independent experts may evaluate the response of each enrolled patient by applying standard oncological criteria.(459) The measurability of a tumor is defined as follows:

**Objective status** (to be recorded at each evaluation)



To confirm any of the following disease assessments, repetition of the respective examination and determination of the status is required after 4 weeks, i.e. all responses must be documented to last at least 4 weeks to be considered as valid.

- **Free of Recurrence:** There are no clinical or radiological signs of tumor growth either in the region of the primary tumor or at any distant sight.
- **Local Recurrence:** Local recurrence is defined as any relapse in the area of surgery between the sternum and the anterior axillary line, below the inferior clavicular fossa, and above the 7th rib. Tumor recurrence at one of the pectoral muscles or at the fascias of the serratus lateralis muscle or the oblique externus muscle is also considered as local recurrence.
- **Regional Recurrence:** Relapse infiltrating the skin and/or involving the axillary lymph nodes, or the metastatic infiltration of the nodules in the infraclavicular fossa, is considered a regional recurrence.(460)
- **Distant Metastases:** Patients with relapsing tumor outside the above mentioned sights are considered to have distant disease.
- **Cancer Associated Death:** Only death which can be clearly associated with conditions attributed to the malignant disease, such as distant disease, will be considered as cancer associated death.

The analyses will be performed as an intention to treat analyses, not excluding those patients who discontinue from the study for any given reason.

#### 5.12.1.2 Definition of Efficacy Measures

Survival free of progression is defined as the time from the date of randomization to the date of diagnosis of locoregional recurrence or distant metastases. Locoregional recurrence is defined as any relapse in the area of primary surgery and/or ipsilateral regional axillary lymph nodes including the nodules of the infra- or supraclavicular fossa. Any other tumor manifestation is defined as distant disease.

Additionally, analyses for overall survival as the time from the date of randomization to the date of death associated with cancer related causes and from any other cause will be performed, as well as the evaluation of all other secondary study objective.

#### 5.12.2 Safety

Investigators taking part in the SUCCESS study are responsible for monitoring the safety of patients who have entered this study and for alerting the study coordinator board to any event that appears beyond the expected spectrum of adverse effects (compare relevant section).

The investigator is responsible for appropriate medical care of study participants during the study in connection with protocol procedures.

After a study participant's completion of or discontinuation from the study, the investigator remains responsible to follow adverse events that are serious or that caused the study participant to discontinue before completing the study.

##### 5.12.2.1 Clinical Adverse Events

For most accurate documentation of the safety of the therapy, a clinical trial adverse event is any unexpected medical occurrence in a patient who received a relevant pharmaceutical product.



The lack of drug effect is not an adverse event in this trial, since the purpose of this study is to establish the degree of efficacy.

Initially, study site personnel will question each patient and will note the occurrence and nature of presenting condition(s) and any pre-existing condition(s). During the study, site personnel will question the patient and will note any change in the presenting condition(s), any change in the pre-existing condition(s) and/or occurrence and nature of any adverse events.

#### 5.12.2.1.1 Adverse Event Reporting Requirements

All adverse events, without exception, must be reported in the clinical report forms (CRF). The reporting of all serious adverse events is described in chapter 5.12.2.1.2. If a patient's dosage is reduced or if a patient is discontinued from the study because of any significant laboratory abnormality, inadequate response to treatment, or any other reason, study site personnel must report and clearly document the circumstances and data leading to any such dosage reduction or discontinuation. Adverse events other than serious adverse events are assessed within the toxicity section in the documentation forms.

#### 5.12.2.1.2 Serious Adverse Events

The study investigators will inform the study coordinator board immediately by telephone (089-5160-4170) or fax (089-5160-4715) of any serious adverse event. The study coordinator board will inform cooperating study sites and the pharmaceutical product supplier of any serious adverse event immediately thereafter. Serious adverse events will be collected after the patient has been randomized and receives study drug. If a patient suffers a serious event after signing the informed consent, but prior to receiving study treatment, the event will not be collected unless the investigator feels the event may have been caused by a protocol procedure.

Adverse events are considered serious, if one of the following criteria is met:

- Death
- Prolonged inpatient hospitalization
- Substantial or permanent disability
- Cancer
- Congenital anomaly
- Overdose
- Significant for other reason.

Additionally to the immediate report by telephone, Adverse Event Forms supplied by the study coordinator board (see appendix) must be completed whenever a serious event occurs -regardless of its causal relationship to the study treatment - and sent to the study secretary. After thirty days post discontinuation, investigators should report only serious adverse events that are believed to be causally related to study treatment.

All serious adverse events, without exception, must be reported to the study coordinator board within 24 hours:





## **Study Office**

Frauenklinik Innenstadt, Klinikum der LMU München,  
Maistr. 11, 80337 München  
z.H. Fr. N. Bleier and S. Dondl  
Phone: 089 - 5160 - 4111 / - 4170  
Fax: 089 - 5160 - 4547  
eMail: [SUCCESS@fk-i.med.uni-muenchen.de](mailto:SUCCESS@fk-i.med.uni-muenchen.de)

### **5.12.3 Additional translational research investigation**

#### **5.12.3.1 Peripheral Blood Sampling**

Samples are collected in tubes containing 50 ml peripheral blood.  
Blood samples will be collected at four time points of treatment:

- Before the start of chemotherapy
- After completion of chemotherapy, before the start of endocrine treatment
- After two years of endocrine and zoledronate treatment
- After five years of endocrine treatment

The blood samples will be examined for the following markers:

4. Tumor markers CA 15-3 and CA 25-29
5. Detection of isolated tumor cells, using the immunocytochemical approach described above
6. Additional translational research question, which will be appropriate to investigate the question of persisting minimal residual disease.

In case, the test of points 1 or 2 exceed the normal range within two fold in two subsequent tests, the center and the patient will be informed to trigger intensified metastases screening as defined above.

#### **5.12.4 Quality of life assessment**

In oncology there is special need to assess the patient's quality of life during and after treatment. Optimally the efficacy of the chemotherapy and the toxicity/quality of life should be well balanced. In this study we use the EORTC QLQ-C30, combined with the special modul for breast cancer EORTC QLQ-BR23. These questionnaires should be filled in by the patient itself before each cycle, one month after the last cycle and at any follow-up visit.

The completion or neglect of completion of the questionnaires has to be documented in clinical report form of the relevant cycle.

#### **5.12.5 Follow-up**

The patients should attend the oncology out-patient department of the institution according to clinical necessities but at least every 3 months for the first three years.



During the subsequent three years, the follow-up visits should be scheduled every 6 months, and yearly thereafter. Follow-up will include clinical examination at each visit as well as mammography every 12 months. Chest radiography, ultrasonography of the liver, bone scan, and blood tests, as well as computed tomography of the appropriate region, should be performed according to tumor manifestation and/or symptoms. If patients sought care elsewhere, data will have to be collected from the family physicians or gynecologists in charge. Please note requirements about efficacy measures depicted in the relevant section of this protocol.

If the testing of the peripheral blood samples indicates increased risk for relapse, as specified in the relevant section, the participating study center and the patient will be informed and intensified follow-up will commence. The intensified follow-up program includes:

- Chest radiography
- ultrasonography of the liver
- bone scan,
- continued peripheral blood sampling

repeated at 3 month intervals until relapse is detected or the repeated blood sampling shows at least 2 blood results within the defined normal range.

### **5.12.6 Safety Monitoring**

The steering committee will monitor safety data throughout the course of the study.

### **5.12.7 Appropriateness and Consistency of Measurements**

All efficacy and safety assessments included to answer the primary and secondary study objectives used in this study are standard for an oncological trial. These include the time to progression after randomization, overall survival time after randomization and toxicity.

The EORTC QLQ-C30 and BR23 questionnaires have been validated in multiple languages and been tested for reliability, sensitivity to change and cross-cultural validation.(461) The EORTC QLQ-C30 and BR23 questionnaires will be supplied to all study sites in native language. Collection of quality of life data will not interfere with the routine collection of adverse events.

## **5.13 Patient Disposition Criteria**

### **5.13.1 Discontinuations**

A patient will be discontinued from the study under the following circumstances:

- If there is evidence of progressive disease
- If the attending physician believes that a different therapy would be in the best interest of the patient
- If the patient requests discontinuation
- If the drugs exhibit unacceptable toxicity
- If any toxicity requires a dose reduction of more than 50% or an interval prolongation of more than 2 weeks for the next cycle, unless approved by the study coordinators.



- If any other cytotoxic or other anti-neoplastic treatment (except the one mentioned in the protocol) is required during the study.

If a patient is excluded from the study for any of the above mentioned reasons, the following examinations should be performed:

- Limited medical history and physical examination, including toxicity assessment.
- Evaluation of performance status (ECOG scale).
- Quality of Life (QoL) questionnaires EORTC QLQ-C30 and QLQ-BR23.
- Clinical laboratory tests:
  - Hemoglobin, WBC, neutrophils and platelets (differential blood count)
  - Bilirubin, liver enzymes (GOT, GPT), gamma-GT, creatinine, potassium, sodium, PTT, INR, albumine and protein.

### **5.13.2 Study Extensions**

No extensions are planned in the study. If there will be any extensions not planned at the time of the start of the study, they have to be approved exclusively by the sponsor, the advisory board, the study coordinator board and the ethical review board.

### **5.14 Compliance**

Epirubicin, docetaxel, fluorouracil, zoledronate, gemcitabine and the cyclophosphamide medication, and therefore all main investigational drugs, will be administered intravenously only at the investigational sites. Therefore, patient compliance is ensured. Patients who return for follow-up visits will receive study drugs unless they are encountering toxicity problems or their disease has progressed.

### **5.15 Quality Assurance**

To ensure accurate, complete, and reliable data, the study coordinator board will:

- Provide instructional material to each study site (following GCP)
- Perform and sponsor study meetings before the start of the study and at least once a year following to instruct the investigators. These meetings will prove instruction in all sections of the protocol, the completion of the clinical report forms and study procedure
- Make periodic visits to the study site at least once per year and compare the information contained in the clinical report forms with the original patient records (random sampling monitoring by the company Alcedis. Periodic reports by the monitoring company will be addressed to the study office and the sponsor Aventis.
- Be available at any time for consultation and in contact with the study site personnel by mail, email, telephone or fax
- Review and evaluate clinical report data and will use standard computer edits to detect errors in data collection

To ensure accurate, complete, and reliable data, the study investigator board will:

- Keep records of laboratory tests, clinical notes and the patients records in the



- patient's files as original source documents for the study.
- Keep a list of all registered and randomized patients in order to identify them properly.
  - Fill in the clinical report forms (following GCP)
- The study may be audited by the study monitor and/or regulatory agencies at any time.

The sponsor reserve the right of the disqualification of any study center which is conducting the study in non-conformance to the protocol or violating any of the ethical or legal principles.

## 5.16 Patients' Insurance

A patients' insurance (HDI Konzern, Insurance Police Number 20-003245-03123-390) will cover study related adverse events as depicted in the insurance contract. The insurance coverage will comprise all study sites which comply with all study regulations. Patients have to contact the study site immediately in case of any medical problem as described in the patients' declaration.

## 6 Statistical Methods

### 6.1 Sample Size

This is an open-label, multicenter, 2x2 factorial design, randomized controlled, Phase III study comparing the disease free survival after randomisation in patients treated with 3 cycles of Epirubicin-Fluorouracil-Cyclophosphamide(FEC)-chemotherapy, followed by 3 cycles of Docetaxel(D)-chemotherapy versus 3 cycles of Epirubicin-Fluorouracil-Cyclophosphamide(FEC), followed by 3 cycles of Gemcitabine-Docetaxel(DG)-chemotherapy, and to compare the disease free survival after randomisation in patients treated with 2 years of Zoledronate versus 5 years of Zoledronate in patients with early primary breast cancer.

The primary objectives of this trial are:

- The first primary objective of this study is to compare disease free survival after randomisation in patients treated with a combination of 5-FU/Epirubicin/Cyclophosphomide followed by Docetaxel (Arm A1) vs. 5-FU/Epirubicin/Cyclophosphomide followed by Docetaxel/Gemcitabine (Arm A2)
- The second primary objective of this study is to compare disease free survival after randomisation in patients with Zoledronate x 5a (Arm B1) vs. Zoledronate x 2a (Arm B2).

The following assumptions are made:



- The DFS at 5 years of patients receiving FU/Epirubicin/Cyclophosphomide followed by Docetaxel (Arm A1) is 78,3%.
- There will be an absolute of 4% improvement in 5-year DFS (i.e. an increase from 78,3% to 82,3% ) for patients receiving FU/Epirubicin/Cyclophosphomide followed by Docetaxel/Gemcitabine (Arm A2).
- There will be the same improvement in 5-year DFS for patients receiving Zoledronate x 5a (Arm B1) in relation to patients receiving Zoledronate x 2a (Arm B2).
- The error rate for a false positive outcome ( $\alpha$ ) is set to 5%, using two-sided significance tests.
- The error rate for a false negative outcome ( $\beta$ ) is set to 20%, i.e. the power of the trial is set to 80%.
- The common exponential drop out rate over whole duration of the study is 10%.
- The accrual period during which patients enter the study is 60 months (5 years).
- The follow-up period from the end of accrual until the analysis of the data is 36 months (3 years).

To confirm the absolute increase of DFS-rates at 5 years by 4% from 78,3% to 82,3% for patients from therapy arms A1 /A2 by a two-sided log rank tests, a total of N=743 events are needed. The total number of patients to be included into the trial is equal to N=3658 (i.e. 1829 patients per arm, assuming both 1:1 randomization and common exponential drop-out rate over whole duration of the study of 10%). An overview on the relation of total sample size calculated to different values of clinically significant difference (4% - 6%) and to the length of the follow-up period (3, 5, 8 years) is given in the following table.

$\alpha = 0,05\%$  and  $\beta = 20\%$  (Power = 80%), expected drop-out rate=10%, accrual = 5 years

Two-sided log-rank test (preferred by regulatory authorities)

| Sample Size                       | + FU = 3 years                    | + FU = 5 years                    | + FU = 8 years                    |
|-----------------------------------|-----------------------------------|-----------------------------------|-----------------------------------|
| $\Delta$ DFS = 4% (78,3% → 82,3%) | # events = 743<br># pat= 2 x 1829 | # events = 743<br># pat= 2 x 1397 | # events = 743<br># pat= 2 x 1060 |
| $\Delta$ DFS = 5% (78,3% → 83,3%) | # events = 444<br># pat= 2 x 1131 | # events = 444<br># pat= 2 x 863  | # events = 444<br># pat= 2 x 654  |



|                                   |                                  |                                  |                                  |
|-----------------------------------|----------------------------------|----------------------------------|----------------------------------|
| $\Delta$ DFS = 6% (78,3% → 84,3%) | # events = 297<br># pat= 2 x 783 | # events = 297<br># pat= 2 x 596 | # events = 297<br># pat= 2 x 451 |
|-----------------------------------|----------------------------------|----------------------------------|----------------------------------|

All sample size calculations were obtained using the software nQuery Advisor ® 5.0.

## 6.2 Interim Analyses

Safety data will be monitored on an ongoing basis and will be particularly reviewed from a safety perspective when 20, 50 and 100 patients in each arm have received three cycles and six cycles of therapy. If the study medication is tolerated, the study will be continued as planned. In case of unexpected toxicity the advisory board will be informed.

Efficacy interim analyses will be performed after 50% and 75% of the expected events of recurrence for the primary objective, the difference in the disease free survival after randomisation in patients treated with 3 cycles of Epirubicin-Fluorouracil-Cyclophosphamide(FEC)-chemotherapy, followed by 3 cycles of Docetaxel(D)-chemotherapy versus 3 cycles of Epirubicin-Fluorouracil-Cyclophosphamide(FEC), followed by 3 cycles of Gemcitabine-Docetaxel(DG)-chemotherapy have emerged.

### 6.2.1 Adjustment of significance levels

The level of significance will be adjusted according to a group sequential design with two efficacy interim analyses after occurrence of 50% and 75%, with the alpha spending function as proposed by Lan – DeMets<sup>(462)</sup> and with alpha-levels for the 1<sup>st</sup>, 2<sup>nd</sup> and final analysis as proposed by O'Brien and Fleming<sup>(463)</sup>. The respected adjusted alpha-levels for the 1<sup>st</sup>, 2<sup>nd</sup> and final analysis will be set to  $\alpha_1=0.00052$ ,  $\alpha_2=0.01411$  and  $\alpha_3=0.04507$ .

### 6.2.2 Premature Discontinuation – Early Stopping Rules

In accordance with the advisory board and the independent data monitoring board, the study might be discontinued if any of the following reasons are present:

- If patients' recruitment is insufficient, that is, if the recruitment is < 250 patients per year.
- If due to unexpected events the continuation of the study is not acceptable (ethical, medical or pharmaceutical legal aspects). This will be particularly the case, if the incidence of therapy associated fatal complications will exceed 2 % of the enrolled patients at any given time. Febrile neutropenia will lead to the premature discontinuation of the study, if it occurs in > 30% of the cases in any or



both treatment arms. The study will also be prematurely discontinued, if the incidence of acute leukemia cases exceeds 2 % during the observation time of the study.

- Superiority of one of the treatment arms in terms of the primary or secondary endpoints of this study, as indicated by statistical significance adjusted for the interim analyses (see 6.2 for details).

## 6.3 Data Analyses

### 6.3.1 Independent Data and Safety Monitoring Board

An Independent Data and Safety Monitoring Committee will be attached to the randomized clinical trial and charged with the responsibility of monitoring performance of the trial, safety of the participants, and efficacy of the treatments being tested.(464;465) The necessity of a DSMB stems from the ethical imperative to dissociate the treating physician from the accruing data in order to maintain a legitimate “state of equipoise” regarding the therapies being studied and to remove those with vested interest in specific treatment from deciding whether the trial should continue.

The duties of the Independent Data and Safety Monitoring Committee will comprise monitoring the following:

- Recruitment, retention
- Protocol violations
- Identify need for additional data to clarify endpoints
- Identify problems with the study assumptions used for planning and design (e.g., sample size reviews)
- If interim data indicate an intervention is harmful, the trial may be stopped.
- If interim data demonstrate a clear benefit from an intervention, the trial may be stopped.

The Independent Data and Safety Monitoring Committee will comprise a Chair and multidisciplinary member, including clinician(s), statistician(s), an ethicist, a clinical trialist and an executive secretary.

### 6.3.2 General Considerations

Before an analysis or interim analysis is done, an analysis plan will be written, that contains details on all analyses to be performed (final version before data base lock). All analyses of explorative nature are based on a 5%-significance level. 95%-confidence intervals will be constructed for parameters to be estimated.

Frequency tables will be generated for qualitative variables. Quantitative parameters will be described by mean values, standard deviation, minimum, median, and maximum.

Inferential analyses on the primary efficacy variable “time to progression” will be performed using the log-rank- tests.

The adjusted alpha-levels for the 1<sup>st</sup>, interim analysis will be set to  $\alpha_1=0.00052$ ,



the respective level of the 2<sup>nd</sup> interim analysis will be  $\alpha_2=0.01411$  and the adjusted alpha-level for the final analysis will be set to  $\alpha_3=0.04507$ .

Cox's regression analysis will be used to explore the influence of other variables on the TTP.<sup>(466)</sup> To compare categorical variables, we will use the  $\chi^2$ -test or Fisher's exact test if appropriate according to the number of cases. The Mann-Whitney U test will be used to calculate the differences in location of continuous variables between the two treatment regimens.

P values of less than .05 for all analyses of explorative nature and secondary efficacy variables will be considered significant in two-sided tests. Variance analytic models can be used for adjusting results by other parameters.

### **6.3.3 Study Populations**

The analyses will be performed on data from qualified patients, who meet the following conditions:

- All patients who receive at least one dose of study medication will be evaluated for safety.
- All enrolled patients will be evaluated for efficacy.
- All enrolled patients who have completed a baseline and at least one post-baseline EORTC QLQ-C30 and BR23 questionnaires will be qualified for the quality of life analysis.
- All patients in whom had at least one peripheral blood samples were collected

### **6.3.4 Patient Disposition**

A detailed description of patient disposition will be provided. It will comprise:

- A definition of patient qualification
- A summary of data on patient discontinuation
- A summary of data on overall qualification status of all patients
- An account of all identified protocol variations.

All patients entered in the study will be accounted for in the summation. The number of patients who do not qualify for the analysis, who die, or who discontinue from the study before treatment begins, will be specified.

## **6.4 Patient Characteristics**

Patient characteristics will include a summary of the following:

- Patient demographics
- Baseline disease characteristics
- Pre-existing conditions
- Historical illness
- Prior treatment
- Concomitant medication

Other patient characteristics will be summarized as found appropriate. Differences in patient characteristics between treatment groups will be checked.





### **6.4.1 Efficacy Analyses**

A log-rank test is used to perform confirmatory testing on the primary objective, the difference in the disease free survival after randomisation in patients treated with 3 cycles of Epirubicin-Fluorouracil-Cyclophosphamide(FEC)-chemotherapy, followed by 3 cycles of Docetaxel(D)-chemotherapy versus 3 cycles of Epirubicin-Fluorouracil-Cyclophosphamide(FEC), followed by 3 cycles of Gemcitabine-Docetaxel(DG)-chemotherapy, and to compare the disease free survival after randomisation in patients treated with 2 years of Zoledronate versus 5 years of Zoledronate in patients with early primary breast cancer. The global two-sided significance level is set to  $\alpha=0.04507$  for the final analysis.(467)

On a 5%-significance level, additional exploratory testing will be performed on the difference between the two treatment groups according to the secondary objectives of this study:

- Overall survival time after randomization
- Toxicity
- Changes in quality of life over time as defined by EORTC QLQ-C30 and BR23 questionnaires
- The predictive and prognostic value of markers in peripheral blood, as specified in the translational research program
- Effect on the presence of disseminated tumor cells in bone marrow in peripheral blood
- Subgroup analyses for the above mentioned criteria in terms of tumor size, axillary lymph node status, histopathological grading, HER2-status, menopausal status and interaction between the randomizations
- Additional analyses as regarded necessary and informative

### **6.4.2 Safety Analyses**

All patients who are treated with at least one cycle of study medication will be evaluated for safety. Safety analyses will include the following:

- Summary of the type and number of transfusions required
- Summary of the adverse event rates and laboratory changes
- Summary of the number of NCI CTC toxicity grades

## **6.5 General Considerations**

The interpretation of study results will be the exclusive responsibility of the sponsor Prof. Dr. H. Sommer. The sponsor Prof. Dr. H. Sommer also will be responsible for the appropriate conduct of an internal review process for both the final study report and any study-related material for publication. Any data analysis and publication activity outside the Frauenklinik Innenstadt, Klinikum der LMU Munich has to be approved by the Steering Committee.



## **7 Informed Consent, Ethical Review, Regulatory Considerations, Legal and Administrative Regulations**

### **7.1 Informed Consent**

The informed consent document will be used to explain in simple terms, before the patient is entered into the study, the risks and benefits of the study to the patient. The informed consent document must contain a statement that the consent is freely given, that the patient is aware of the risks and benefits of entering the study, and that the patient is free to withdraw from the study at any time.

The investigator is responsible to see that informed consent is obtained from each patient and for obtaining the appropriate signatures and dates on the informed consent document prior to the performance of any protocol procedures and prior to the administration of any study drug. Informed consent for the SUCCESS chemotherapy trial has to be obtained prior to the performance of any protocol procedures and prior to the administration of any study drug.

### **7.2 Ethical Review**

The study and the informed consent document has been accepted by the ethical review board (Ethikkommission der Medizinischen Fakultät der Ludwig-Maximilians-Universität München), project number xxx/05 (see appendix).

The ethical review board agreed to monitor the conduct of the study and agreed to review it periodically. The study coordinators will provide all study centers with information about any revisions to the informed consent document or amendments to the protocol. Furthermore the study coordinators must send a copy of the SAE to the ethical review board and report the premature or regular study discontinuation.

The study centers themselves are responsible to inform the local ethical review board about the study and to get approval prior to patient's inclusion.

### **7.3 Regulatory Considerations**

This study will be conducted in accordance with the ethical principles stated in the most recent version of the Declaration of Helsinki and the applicable guidelines of the International Conference on Harmonization Good Clinical Practice Guideline 1998, whichever represents the greater protection of the individual.

After reading the protocol, each principle investigator/ investigator will sign two protocol signatures pages and return one of the signed pages to the study coordinators (compare later chapter).

### **7.4 Legal and administrative regulations**

#### **7.4.1 Good Clinical Practice**

The guidelines of Good Clinical Practice (GCP), valid since 17/01/1997, will be applied.



The study will be officially registered at the 'Regierung of Oberbayern'.

The study sites are responsible for submitting the protocol to their responsible department of government and administration.

The sponsor of this study, Prof. Dr. H. Sommer is board certified gynecologist with a Ph.D. degree in gynecology, gynecological oncologist, certified radiologist and certified radiotherapist. He is nationally and internationally renowned scientist with longstanding experience in clinical science.

#### **7.4.2 Patients' identification list**

All patient related data will be assessed anonymously. Each patient will be clearly identified through the patient number, her initials, and date of birth. The investigator is keeping this list confidentially.

#### **7.4.3 Storage of study documents**

The originals of all study documents including documentation forms must be stored in the study office and the statistical center, respectively, for at least 15 years after the final report has been assessed. The study office has to store all administrative documents concerning the study (correspondence with ethical review boards, regulation surveys, study coordinator board), the contracts with the Principle Investigator of each study site and the sponsors, the documentation forms, the Serious Adverse Event forms, general study documentation (protocol, amendments) and the monitoring reports. The statistical center will store the randomization forms of all patients. Monitoring reports on each monitor visit will be stored at the CRO. The Principle Investigator of each study site has to store all administrative documents concerning the study (correspondence with ethical review boards, regulation surveys, study coordinator board), the patients' identification list, the signed informed consent documents, copies of the documentation forms and the general study documentation (protocol, amendments) for the above mentioned time period.

#### **7.4.4 Financiation**

The overhead of the study is partly supported by the pharmaceutical companies Sanofi-Aventis, AstraZeneca, Novartis, Lilly and Chugai.

Participating Study Centers will be compensated with 600,-€ documentation honorary/patient (plus sales tax) for the complete documentation, including follow-up, electronic data documentation and complete blood sample supply.

A reduction of the honorary of 100€ will be applied for each of the following conditions met:

- The documentation is not provided in electronic form,
- the third blood sample is omitted or
- the forth blood sample is omitted



### **7.4.5 Amendment**

Because clinical knowledge is changing over time, there is the possibility of adding amendments to the protocol at any time. These amendments always have to be approved by the sponsor, the advisory board, the study coordinator board and the scientific committee. The ethical review board will be informed about any changes in the protocol.



## **8 Appendix**

### **8.1 German Protocol-synopsis**

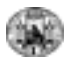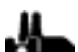

## SUCCESS-Studie

**Multizentrische, prospektiv randomisierte Phase III Studie zum Vergleich von FEC-Doc-Chemotherapie versus FEC-DocG-Chemotherapie, sowie 2 oder 5 Jahre Zoledronattherapie in der adjuvanten Therapie von Patientinnen mit Brustkrebs:  
SUCCESS-STUDIE**

**(A Prospectively Randomized Phase III Trial, studying the benefits of adjuvant sequential vs. combined taxan based chemotherapy and different durations of Zoledronate treatment in early breast cancer: SUCCESS-Trial)**

### 8.1.1. Zielsetzung der Studie

#### Hauptzielkriterium:

Das primäres Studienziel ist der Vergleich der rezidivfreien Überlebenszeit nach Randomisierung von Patientinnen, die adjuvant 3 Zyklen Epirubicin-5-Fluorouracil-Cyclophosphamid(FEC)-Chemotherapie, gefolgt von 3 Zyklen Docetaxel (D)-Chemotherapie versus 3 Zyklen Epirubicin-5-Fluorouracil-Cyclophosphamid(FEC)-Chemotherapie, gefolgt von 3 Zyklen Gemcitabine-Docetaxel (DG)- Chemotherapie erhalten, sowie der Vergleich der rezidivfreien Überlebenszeit nach Randomisierung von Patientinnen, die 2 Jahre versus 5 Jahre mit Zoledronat behandelt werden.

Die sekundären Zielkriterien dieser Studie sind der Vergleich der folgenden Punkte in den vier Behandlungsarmen:

- Gesamtüberleben nach Randomisation
- Fernmetastasenfreies Überleben
- Toxizität
- Änderung der Lebensqualität definiert nach EORTC QLQ-C30 und QLQ-BR23

Zusätzliche Fragestellung:

- Skelettbezogene Ereignisse
- Häufigkeit von Zweitkarzinomen
- Ergebnisse des translationalen Forschungsprogrammes



## Zusätzliche wissenschaftliche Fragestellungen:

- Prädiktiver und prognostischer Wert minimaler Residuen im peripheren Blut (siehe Protokoll), sowie anderer MRD-Marker

### 8.1.2. Einschlusskriterien

- Primäres epitheliales invasives Mammakarzinom pT<sub>1-4</sub>, pM<sub>0</sub>
- Histologischer Nachweis axillärer Lymphknotenmetastasen pN<sub>1-3</sub> **oder** nodal negative high-risk Patientinnen N<sub>0/X</sub>, definiert als pT  $\geq 2$  **oder** histopathologisches Grading 3 **oder** Alter  $\leq 35$  **oder** negativer Hormonrezeptorstatus
- R0-Resektion des Primärtumors (Resektionsränder frei von invasiven Karzinomanteilen), vor maximal 6 Wochen
- Frauen älter als 18 Jahre
- Allgemeinzustand  $\leq 2$  auf der ECOG-Skala
- Adäquate Knochenmarksreserve: Leukozyten  $\geq 3.0 \times 10^9/l$  und Thrombozyten  $\geq 100 \times 10^9/l$
- GOT, GPT und Alkalische Phosphatase innerhalb 1,5-fachem Normalwert des jeweiligen Referenzlabors
- Gewährleistung regelmäßiger Nachsorge während der Studiendauer
- Verständnis des Studienkonzepts und schriftliche Einverständniserklärung

### 8.1.3. Ausschlusskriterien

- Inflammatorisches Mammakarzinom
- Vorangegangene oder gleichzeitige Therapie mit anderen zytotoxischen oder antineoplastischen Medikamenten, die nicht innerhalb dieses Protokolls vorgesehen sind
- Vorgeschichte von Erkrankungen mit Einfluss auf den Knochenstoffwechsel wie z.B. M. Paget und primärer Hyperparathyreoidismus
- Vorausgegangene Behandlung mit Bisphosphonaten innerhalb der letzten 6 Monate
- Eingeschränkte Nierenfunktion nachgewiesen durch berechnete Creatinin-Clearance von  $\leq 30$  ml/min, berechnet nach der Cockcroft-Gault-Formel:

$$\text{CrCl: } \frac{140 - \text{Alter}(\text{Jahre}) * \text{Gewicht}(\text{kg}) * 0,85}{72 * \text{Serum} - \text{Kreatinin}(\text{mg} / \text{dl})}$$

- Zweitkarzinom (außer In-situ-Karzinom der Cervix uteri oder adäquat behandeltes Basaliom)
- Manifeste kardiale Vorschädigung (Kardiomyopathie mit verminderter Ventrikelfunktion (NYHA > II), therapiebedürftige Arrhythmien mit Einfluss auf die LVEF, Z.n. Myokardinfarkt oder Angina pectoris innerhalb der letzten 6 Monate, medikamentös nicht eingestellter Hypertonus)
- Jede bekannte Überempfindlichkeit gegenüber Docetaxel, Epirubicin, Cyclophosphamid, Fluorouracil, Gemcitabin oder sonstiger Studienmedikamente
- Behandlung mit einem zu untersuchenden Medikament in den letzten 3 Wochen vor Studienbeginn
- Patientinnen in Schwangerschaft oder Stillzeit (bei prämenopausalen Frauen muss Kontrazeption gewährleistet werden: Intrauterinpressare, operative Sterilisation oder, nur in hormonrezeptornegativen Mammakarzinompatientinnen, orale, subkutane oder transvaginale, nicht östrogenhaltige Kontrazeptiva)



- Bestehende dentale Beschwerden, Kiefer (Mandibula/Maxilla)- und Zahnentzündungen oder akute oder vorbestehende Kiefernekrosen, von exponierten Knochen in der Mundhöhle, oder von langsam heilenden Wunden nach Zahnbehandlungen
- Kürzlich durchgeführte (6 Wochen) oder geplante Zahn- oder Kieferoperationen (Extraktionen, Implantate)

### 8.1.4. Studiendesign

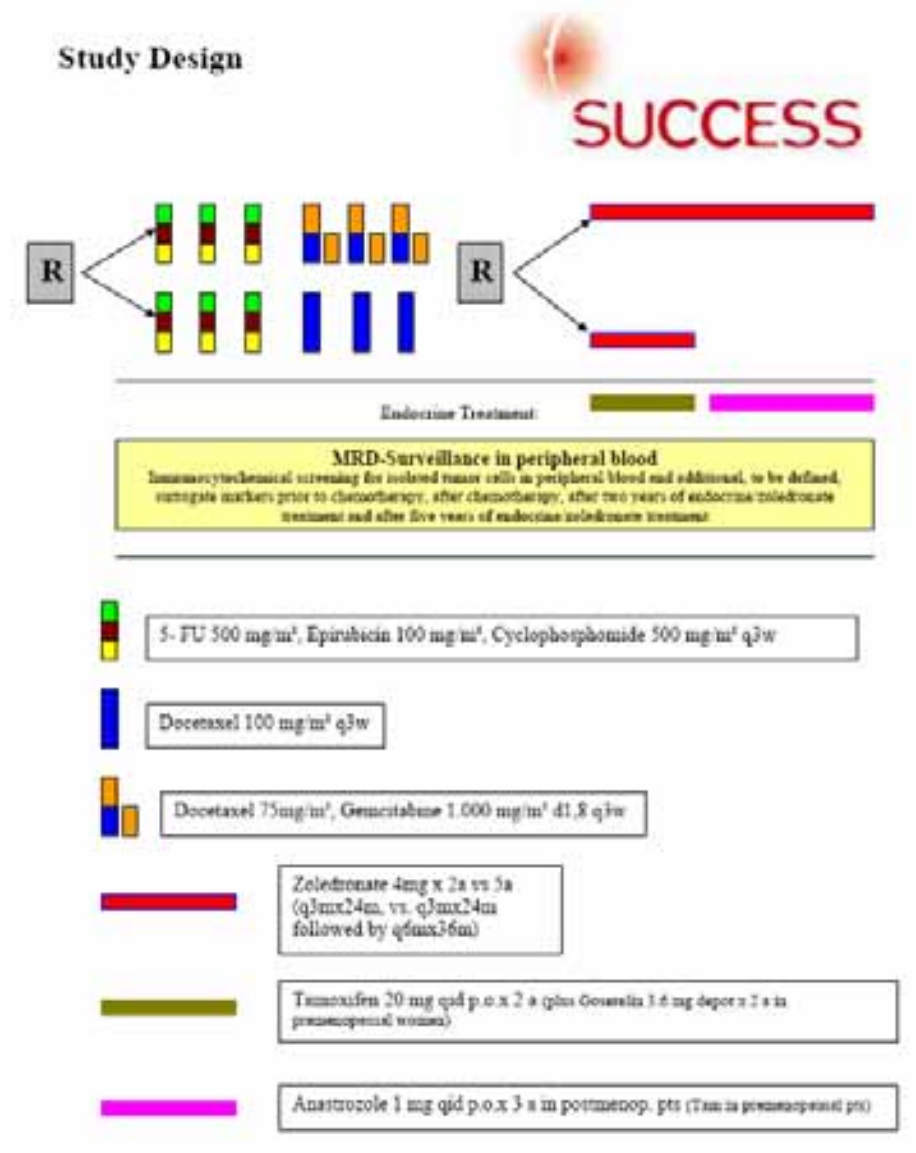

#### Erste Randomisation A:

**AA:** 5-Fluorouracil 500 mg/m<sup>2</sup> und Epirubicin 100 mg/m<sup>2</sup> und Cyclophosphamid



SUCCESS-Trial, Version 1.2, 15.8.2005

Page 127

Anschrift: D-80337 München • Maistraße 11 • Telefon (0 89) 51 60-4111 (Vermittlung)



500 mg/m<sup>2</sup> i.v. KOF q3w x 3

gefolgt von

Docetaxel 75 mg/m<sup>2</sup> und Gemcitabin 1000 mg/m<sup>2</sup> i.v. KOF d1,8 q3w x 3

**AB:** 5-Fluorouracil 500 mg/m<sup>2</sup> und Epirubicin 100 mg/m<sup>2</sup> und Cyclophosphamid

500 mg/m<sup>2</sup> i.v. KOF q3w x 3

gefolgt von

Docetaxel 100 mg/m<sup>2</sup> i.v. KOF q3w x 3

### **Zweite Randomisation B:**

**BA :** Zoledronat 4 mg i.v. q3m x 24m

gefolgt von

Zoledronat 4 mg i.v. q6m x 36m

**BB:** Zoledronat 4 mg i.v. q3m x 24m

Patientinnen erhalten begleitend zur Zoledronattherapie Calcium 500 mg p.o. qid, sowie Vitamin D 400 i.E. qid.

### **Anschlussbehandlung (nach Abschluss der Chemotherapie):**

Falls Hormonrezeptorstatus positiv (Östrogen- u/o Progesteronrezeptor ≥10%)

→ **Tamoxifen** 20 mg/d p.o./d für 2 Jahre

Postmenopausale Patientinnen mit positivem Hormonrezeptorstatus:

→ **nachfolgend Anastrozol** (Arimidex®) 1 mg p.o. für weitere 3 Jahre

Prämenopausale Patientinnen mit positivem Hormonrezeptorstatus:

→ **nachfolgend Tamoxifen** 20 mg p.o. für weitere 3 Jahre

bei Kontraindikationen oder Unverträglichkeit gegen Tamoxifen

→ **Anastrozol** (Arimidex®) 1 mg p.o. für 5 Jahre

Falls Hormonrezeptorstatus positiv

**und** Patientin < 40 Jahre oder Menstruation innerhalb von 6 Monaten nach Ende der Chemotherapie oder LH < 20 mIE/ml, FSH < 20 mIE/ml und E<sub>2</sub> > 20 pg/ml



→ **zusätzlich** Goserelin (Zoladex®) 3,6 mg/ Monat s.c. q4w für 2 Jahre

### **Bestrahlung:**

Folgende Patientinnen erhalten obligat eine Radiatio:

- BET
- $\geq 4$  axilläre Lymphknotenmetastasen
- Tumoren  $> 3\text{cm}$
- multizentrisches Wachstum
- Lymph- oder Hämangiosis carcinomatosa
- Befall der Pektoralisfaszie
- Sicherheitsabschnitt am Schnitttrand  $< 5\text{mm}$ .

Sequentielle Radiotherapie nach Abschluss von 50% der Zyklen möglich aus:

- organisatorischen Gründen
- patientenbezogenen Gründen

### **Stratifikation:**

- Lymphknotenstatus
- Hormonrezeptorstatus (Östrogen- u/o Progesteronrezeptor  $\geq 10\%$ )
- Histopathologisches Grading
- Menopausenstatus
- HER2-neu Status

## **8.1.5. Behandlungsplan**

### **Arm AA:**

#### **Zyklus 1 – 3:**

| <b>Präparat</b>                   | <b>Dosierung</b>      | <b>Applikationsart</b>        | <b>Tag</b> |
|-----------------------------------|-----------------------|-------------------------------|------------|
| 5-Fluorouracil (Fluorouracil-GRY) | 500 mg/m <sup>2</sup> | i.v., 10-15 Min. Kurzinfusion | Tag 1      |
| Epirubicin (Farmorubicin®)        | 100 mg/m <sup>2</sup> | i.v., 15 Min. Kurzinfusion    | Tag 1      |
| Cyclophosphamid (Endoxan®)        | 500 mg/m <sup>2</sup> | i.v., 60 Min. Infusion        | Tag 1      |

#### **Zyklus 4 – 6:**



|                       |                        |                        |         |
|-----------------------|------------------------|------------------------|---------|
| Docetaxel (Taxotere®) | 75 mg/m <sup>2</sup>   | i.v., 60 Min. Infusion | Tag 1   |
| Gemcitabine           | 1000 mg/m <sup>2</sup> | i.v., 30 Min. Infusion | Tag 1,8 |

### **Begleitmedikation Arm AA:**

#### **Zyklus 1 – 3:**

|                        |                                                                                      |                  |                                                        |
|------------------------|--------------------------------------------------------------------------------------|------------------|--------------------------------------------------------|
| Dexamethason           | 8 mg – 0 – 0                                                                         | i.v.             | 15 Min. vor der Infusion                               |
| Mesna<br>(Uromitexan®) | 20% d. Cycloph.-gesamtdosis<br>bzw. nach 1. i.v.-Gabe<br>40% d. Cycloph.-Gesamtdosis | i.v.<br><br>p.o. | 0 – 4 – 8 h nach Infusion<br><br>2 + 6 h nach Infusion |

Wiederholung des Zyklus am Tag 22

#### **Zyklus 4 – 6:**

| <b>Präparat</b>                     | <b>Dosierung</b> | <b>Applikation</b> | <b>Tag</b>                                     |
|-------------------------------------|------------------|--------------------|------------------------------------------------|
| Dexamethason<br>(z.B. Fortecortin®) | 8 mg – 0 – 8 mg  | p.o.               | Morgens und abends am<br>Tag vor der Infusion  |
| Dexamethason                        | 8 mg – 0 – 0     | i.v.               | 15 Min. vor der Infusion                       |
| Dexamethason                        | 0 – 0 – 8 mg     | p.o.               | abends nach der Infusion                       |
| Dexamethason                        | 8 mg – 0 – 8 mg  | p.o.               | morgens und abends am<br>Tag nach der Infusion |

### **Arm AB:**

#### **Zyklus 1 – 3:**

| <b>Präparat</b> | <b>Dosierung</b>      | <b>Applikationsart</b>        | <b>Tag</b> |
|-----------------|-----------------------|-------------------------------|------------|
| 5-Fluorouracil  | 500 mg/m <sup>2</sup> | i.v., 10-15 Min. Kurzinfusion | Tag 1      |
| Epirubicin      | 100 mg/m <sup>2</sup> | i.v., 15 Min. Kurzinfusion    | Tag 1      |
| Cyclophosphamid | 500 mg/m <sup>2</sup> | i.v., 60 Min. Infusion        | Tag 1      |

#### **Zyklus 4 – 6:**

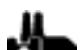

|                       |                       |                        |       |
|-----------------------|-----------------------|------------------------|-------|
| Docetaxel (Taxotere®) | 100 mg/m <sup>2</sup> | i.v., 60 Min. Infusion | Tag 1 |
|-----------------------|-----------------------|------------------------|-------|

Wiederholung des Zyklus am Tag 22

### **Begleitmedikation Arm AB:**

#### **Zyklus 1 – 3:**

|                        |                                                                                      |                  |                                                        |
|------------------------|--------------------------------------------------------------------------------------|------------------|--------------------------------------------------------|
| Dexamethason           | 8 mg – 0 – 0                                                                         | i.v.             | 15 Min. vor der Infusion                               |
| Mesna<br>(Uromitexan®) | 20% d. Cycloph.-gesamtdosis<br>bzw. nach 1. i.v.-Gabe<br>40% d. Cycloph.-gesamtdosis | i.v.<br><br>p.o. | 0 – 4 – 8 h nach Infusion<br><br>2 + 6 h nach Infusion |

#### **Zyklus 4 – 6:**

| Präparat                            | Dosierung       | Applikation | Tag                                            |
|-------------------------------------|-----------------|-------------|------------------------------------------------|
| Dexamethason<br>(z.B. Fortecortin®) | 8 mg – 0 – 8 mg | p.o.        | Morgens und abends am<br>Tag vor der Infusion  |
| Dexamethason                        | 8 mg – 0 – 0    | i.v.        | 15 Min. vor der Infusion                       |
| Dexamethason                        | 0 – 0 – 8 mg    | p.o.        | abends nach der Infusion                       |
| Dexamethason                        | 8 mg – 0 – 8 mg | p.o.        | morgens und abends am<br>Tag nach der Infusion |

### **8.1.6. Allgemeine Empfehlungen zur Therapiedurchführung**

- Jede Begleittherapie, eingeschlossen die Gründe für die Behandlung, Dosierungen und Behandlungsdaten, müssen auf dem Dokumentationsbogen aufgeführt sein.

- Beim Auftreten einer Neutropenie Grad 3/4 kann in beiden Therapiearmen fakultativ eine prophylaktische **orale Antibiose** ( z.B. Levofloxacin (Tavanic®) 500 mg p.o. 1 x/tgl., Ciprofloxacin (Ciprobay®) 500 mg p.o. 2 x/tgl.) gegeben werden. Diese wird jedoch auf jeden Fall empfohlen, falls die Neutrophilen Granulozyten auf  $< 0,5 \times 10^9/l$  abfallen (unabhängig von G-CSF-Gabe).
- Bei jedem Fieber ist unbedingt eine Abklärung (s.u.) erforderlich, jede febrile Neutropenie **muss** stationär mit i.v.-Antibiose behandelt werden!

- In beiden Therapiearmen sollte eine adäquate Behandlung mit **Antiemetika** ( 5-HT-3 Antagonisten, Navoban® 5 mg 2x/tgl. 15 min. vor Infusion) durchgeführt werden. Weitere



Gaben (p.o./i.v.) sollten nach Bedarf auch an den folgenden Tagen durchgeführt werden.

- Bei der **Berechnung der Körperoberfläche** sollen die aktuelle Körpergröße und das Körpergewicht für die Berechnung der Körperoberfläche (KOF) herangezogen werden. Bei übergewichtigen Patienten sollte eine maximale KOF von  $2\text{m}^2$  zugrunde liegen.
- Die **Behandlung mit G-CSF (Granocyte®)** sollte sekundär-prophylaktisch **d 5-10** gegeben werden bei:
  - jeder febrilen Neutropenie
  - Neutropenie  $< 0,5 \times 10^9/\text{l}$  über mehr als 5 Tage
  - Neutropenie  $< 0,1 \times 10^9/\text{l}$
  - Intervallverlängerung wegen LeukopenieTritt eines dieser Kriterien auf, so erfolgt in **allen** nachfolgenden Zyklen die Gabe von G-CSF.

#### 8.1.6.1. Komplikationen während der Neutropenie

Febrile Neutropenien sollten nach dem NCI-Score beurteilt werden (vgl.

Dokumentationsbögen). Die Körpertemperatur sollte möglichst als Körperkerntemperatur bestimmt werden.

Kommt es bei einer Patientin zu Fieber (Kerntemperatur  $> 38.0^\circ\text{C}$ ) im Rahmen einer Neutropenie Grad 3 oder 4, so wird das folgende Vorgehen vorgeschlagen :

1. Stationäre Einweisung (**keine ambulante Antibiotikatherapie!**), Umkehrisolation.
2. Differential-Blutbildkontrolle, stündl. Temperatur-, Puls- und RR-Kontrolle, ggf. Rö.-Thorax zum Ausschluss einer Pneumonie. Ausführliche körperliche Untersuchung. Mikrobiologische Diagnostik (Blutkulturen, Rachenabstrich, Urin, etc.)
3. Beginn einer empirischen antibiotischen Therapie mit breiter Abdeckung im grampositiven und gramnegativen Bereich, z.B. 3-fach-Antibiose i.-v. (Gentamycin 240 mg 1-0-0, Piperacillin 4 g 1-1-1, Combactam 1 g 1-1-1).
4. G-CSF-Applikation (Granocyte®) 1x tgl.

**Nach einer febrilen Neutropenie, die trotz sekundär-prophylaktischer G-CSF-Gabe aufgetreten ist, muss die Dosis im nächsten Zyklus um einen Reduktionslevel gesenkt werden. In den weiteren Zyklen kann dann wieder ein Therapieversuch mit der ursprünglichen Dosis unter sekundär-prophylaktischer G-CSF-Gabe vorgenommen werden!**



### 8.1.7. Intervallverlängerung

Der nächste Zyklus kann wegen hämatologischer bzw. nicht-hämatologischer Toxizität um maximal 2 Wochen verschoben werden. Voraussetzungen für den neuen Zyklus sind:

- Neutrophile Granulozyten  $\geq 1.5 \times 10^9/l$  oder Leukozyten  $\geq 2.0 \times 10^9/l$
- Thrombozyten  $\geq 100 \times 10^9/l$

Bei weiterer Intervallverlängerung muss mit der Studienleitung Rücksprache gehalten werden.

### 8.1.8. Empfehlungen zur Dosisreduktion

#### Randomisation A:

| Dosisreduktionsstufen | 0                      | -1                    | -2                    |
|-----------------------|------------------------|-----------------------|-----------------------|
| Fluorouracil          | 500 mg/m <sup>2</sup>  | 400 mg/m <sup>2</sup> | 300 mg/m <sup>2</sup> |
| Epirubicin            | 100 mg/m <sup>2</sup>  | 80 mg/m <sup>2</sup>  | 60 mg/m <sup>2</sup>  |
| Cyclophosphamid       | 500 mg/m <sup>2</sup>  | 400 mg/m <sup>2</sup> | 300 mg/m <sup>2</sup> |
| Docetaxel (Arm AA)    | 100 mg/m <sup>2</sup>  | 80 mg/m <sup>2</sup>  | 60 mg/m <sup>2</sup>  |
| Gemcitabin            | 1000 mg/m <sup>2</sup> | 800 mg/m <sup>2</sup> | 600 mg/m <sup>2</sup> |
| Docetaxel (Arm AB)    | 75 mg/m <sup>2</sup>   | 60 mg/m <sup>2</sup>  | 45 mg/m <sup>2</sup>  |

Eine weitere Dosisreduktion würde eine insuffiziente Therapie bedeuten, weshalb entsprechende Patientinnen aus der Studie ausscheiden.

#### Randomisation B:

Die Dosis von Zoledronat wird anhand der Creatinin-Clearance reduziert, wenn eine Crea-Clearance < 60 ml/min auftritt. Zur Bestimmung der Crea-Clearance wird folgende Formel verwendet:

$$\text{CrCl: } \frac{140 - \text{Alter}(\text{Jahre}) * \text{Gewicht}(\text{kg}) * 0,85}{75 * \text{Serum} - \text{Kreatinin}(\text{mg} / \text{dl})}$$

#### Creatinine Clearance (mL/min)

≥ 60

#### Zoledronat-Dosierung

4.0 mg

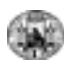

|         |        |
|---------|--------|
| 50 - 60 | 3.5 mg |
| 40 -49  | 3.3 mg |
| 30 - 39 | 3.0 mg |

### 8.1.8.1. Hämatologische Toxizität

Die Chemotherapie dosis im folgenden Zyklus sollte reduziert werden, falls trotz sekundär-prophylaktischer G-CSF-Gabe mindestens eine der folgenden **hämatologischen** Toxizitäten auftraten:

- jede febrile Neutropenie (Temperatur >38.5 °C, Neutropenie < 0.5 x 10<sup>9</sup>/l, stationäre Aufnahme und intravenöse Antibiose )
- Neutropenie < 0,5 x 10<sup>9</sup>/l über mehr als 5 Tage
- Thrombopenie NCI-Grad 4
- Intervallverlängerung wegen Neutropenie

### 8.1.8.2. Nicht-hämatologische Toxizität

Toxische Wirkungen werden anhand der Common Toxicity Criteria of the National Cancer Institute bewertet. Patientinnen mit einer nicht-hämatologischen Toxizität Grad 0-2 erhalten die vorgegebene Gesamtdosis. Falls für ein bestimmtes Symptom keine CTC-Graduierung beschrieben ist, sollte die Toxizität in der folgenden Form kategorisiert werden:

**1** = schwach, **2** = mäßig, **3** = schwer und **4** = lebensbedrohlich.

|                                                                                     |                                               |
|-------------------------------------------------------------------------------------|-----------------------------------------------|
| <b>Gastrointestinal</b>                                                             |                                               |
| Mukositis CTC -Grad 3                                                               | Reduktion der Chemotherapie um <b>1 Stufe</b> |
| Mukositis oder Erbrechen CTC -Grad 4                                                | Abbruch der Behandlung                        |
| <b>Neurologisch</b>                                                                 |                                               |
| CTC -Grad II                                                                        | Reduktion der Chemotherapie um <b>1 Stufe</b> |
| CTC -Grad III (intolerable Parästhesien oder schlechter) und NCI-Grad IV (Paralyse) | Abbruch der Behandlung                        |
| <b>Flüssigkeitsretention</b>                                                        |                                               |
| Grad III                                                                            | Abbruch der Behandlung                        |
| <b>Kardial</b>                                                                      |                                               |



|                                                                                                                                |                                                                              |
|--------------------------------------------------------------------------------------------------------------------------------|------------------------------------------------------------------------------|
| AV-Block Grad 1, asymptom. Bradykardie, isolierte asymptom. ventrikuläre Extrasystolen                                         | Weiterbehandlung unter kardialen Monitoring                                  |
| Behandlungsbedürftige Arrhythmie, AV-Block > Grad 1, LVEF-Abfall um >20% oder um >10% und LVEF unterhalb des Klinikgrenzwertes | Abbruch der Behandlung                                                       |
| <b>Pulmonal</b>                                                                                                                |                                                                              |
| Chemotherapieassoziierte Pneumonie ≥ Grad 2                                                                                    | Abbruch der Behandlung                                                       |
| <b>Andere gravierende Organtoxizität</b>                                                                                       |                                                                              |
| CTC -Grad ≥ 3 (außer Alopezie, Übelkeit und Erbrechen)                                                                         | Reduktion der Chemotherapie um <b>1 Stufe</b> (nach Ermessen des Prüfarztes) |
| CTC -Grad 4                                                                                                                    | Abbruch der Behandlung                                                       |

Sollten schwerwiegende Toxizitäten (Grad III und IV) auch nach Reduktion der Chemotherapie-Dosierung auftreten, sollte zur Absprache des weiteren therapeutischen Vorgehens Rücksprache mit der Studienleitung genommen werden.

### 8.1.9. Begleittherapie

- Da Übelkeit und Erbrechen regelmäßig nach der Verabreichung der genannten Zytostatika auftreten, sollte eine antiemetische Prophylaxe mit 5-HT-3-Antagonisten verabreicht werden.
- G-CSF Gabe gemäß der in Kapitel 8.1.6 definierten Kriterien.
- Die palliative und supportive Behandlung von mit der Tumorerkrankung zusammenhängenden Symptomen wird allen Patienten im Rahmen dieser Studie angeboten werden.
- Bei Patientinnen mit einem eindeutig HER2-neu überexprimierenden Tumor (IHC +++ oder FISH +) ist die Therapie mit Trastuzumab nach Abschluss der Chemotherapie über ein Jahr erlaubt.
- Keine anderen antineoplastisch wirksamen Substanzen dürfen während der Verabreichung der Studienmedikamente gegeben werden.

### 8.1.10. Kontrolluntersuchungen

Maximal **2 Wochen** vor Randomisation:

- Anamnese, Klinische Untersuchung, Begleitmedikation, Begleiterkrankungen,





- Größe, Gewicht
- Aktivitätsstatus (ECOG),
- EORTC QLQ-C30 + BR23 Lebensqualitätsfragebogen
- EKG
  
- Labor:
  1. Blutbild
  2. Bilirubin, GOT, GPT, yGT, AP, Kreatinin, Natrium, Kalium, Gerinnung (PTT, INR), Albumin, Protein
  3. Schwangerschaftstest bei prämenopausalen Frauen

Maximal **5 Wochen** vor Randomisation:

- Röntgen-Thorax in 2 Ebenen
- Ganzkörperszintigraphie
- Ultraschall Leber

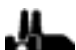

**Tabelle 1 Zusammenfassung der notwendigen Untersuchungen:**

| Untersuchung                                                                                        | Zeitpunkt | Vor Beginn der Therapie (max. 2 Wochen vor Randomisation) | Vor jedem Zyklus | 4 Wochen nach letzter Chemotherapie | 6 Wochen nach letzter Strahlentherapie | Follow-up alle 3 Mon. (2a), alle 6 Mon. (3a) |
|-----------------------------------------------------------------------------------------------------|-----------|-----------------------------------------------------------|------------------|-------------------------------------|----------------------------------------|----------------------------------------------|
| Demographische Daten                                                                                |           | X                                                         |                  |                                     |                                        |                                              |
| Ein- und Ausschlusskriterien                                                                        |           | X                                                         |                  |                                     |                                        |                                              |
| Patienten-Einverständniserklärung                                                                   |           | X                                                         |                  |                                     |                                        |                                              |
| Registrierung/Randomisation                                                                         |           | X                                                         |                  |                                     |                                        |                                              |
| Anamnese                                                                                            |           | X                                                         | X                | X                                   | X                                      | X                                            |
| Klinische Untersuchung                                                                              |           | X                                                         | X                | X                                   | X                                      | X                                            |
| Größe, Gewicht                                                                                      |           | X                                                         | X                | X                                   | X                                      | X                                            |
| Begleitmedikation                                                                                   |           | X                                                         | X                | X                                   | X                                      | X                                            |
| Begleiterkrankungen                                                                                 |           | X                                                         | X                | X                                   | X                                      | X                                            |
| Aktivitätsstatus (ECOG)                                                                             |           | X                                                         | X                | X                                   | X                                      | X                                            |
| EORTC QLQ-C30 + BR23 Lebensqualitätsfragebogen                                                      |           | X                                                         | Vor Zyklus 4     | X                                   | X                                      | X                                            |
| Blutentnahme für MRD-Surveillance                                                                   |           | X                                                         |                  | X                                   |                                        | 2 bzw. 5 Jahre n. Ende d. Chemoth.           |
| Blutbild                                                                                            |           | X                                                         | 1 - 2 x/Woche    | X                                   |                                        | b.B.                                         |
| Natrium, Kalium                                                                                     |           | X                                                         | X                | X                                   |                                        | b.B.                                         |
| Kreatinin                                                                                           |           | X                                                         | X                | X                                   |                                        | b.B.                                         |
| Bilirubin, GOT, GPT, γGT, AP                                                                        |           | X                                                         | X                | X                                   |                                        | b.B.                                         |
| Albumin, Eiweiß                                                                                     |           | X                                                         |                  | X                                   |                                        |                                              |
| INR, PTT                                                                                            |           | X                                                         |                  | X                                   |                                        |                                              |
| Schwangerschaftstest (prämenop.)                                                                    |           | X                                                         |                  |                                     |                                        |                                              |
| EKG                                                                                                 |           | X                                                         |                  | X                                   |                                        |                                              |
| Bildgebende Diagnostik (bis 5 Wochen vor Randomisation)<br>Lebersono, Knochenszinti, Röntgen-Thorax |           | X                                                         |                  |                                     |                                        | b.B.                                         |
| Toxizität (NCI)                                                                                     |           |                                                           | X                | X                                   | X                                      | X                                            |
| Überlebens-/Rezidivstatus                                                                           |           |                                                           |                  | X                                   | X                                      | X                                            |



## **8.2 Quality of Life Survey (German)** **(EORTC QLQ-C30 + QLQ-BR23)**



## **EORTC QLQ-C30 (version 3.0) Patientinnen-Nr. ....Zentrums-Nr. ....**

Wir sind an einigen Angaben interessiert, die Sie und Ihre Gesundheit betreffen. Bitte beantworten Sie die folgenden Fragen selbst, indem Sie die Zahl ankreuzen, die am besten auf Sie zutrifft. Es gibt keine "richtigen" oder "falschen" Antworten. Ihre Angaben werden streng vertraulich behandelt.

Bitte tragen Sie Ihre Initialen ein: ~  
Ihr Geburtstag (Tag, Monat, Jahr): ~  
Das heutige Datum (Tag, Monat, Jahr): ~

|                                                                                                                                   | <b>Überhaupt<br/>nicht</b> | <b>Wenig</b> | <b>Mäßig</b> | <b>Sehr</b> |
|-----------------------------------------------------------------------------------------------------------------------------------|----------------------------|--------------|--------------|-------------|
| 1. Bereitet es Ihnen Schwierigkeiten sich körperlich anzustrengen (z.B. eine schwere Einkaufstasche oder einen Koffer zu tragen?) | 1                          | 2            | 3            | 4           |
| 2. Bereitet es Ihnen Schwierigkeiten, einen <u>längeren</u> Spaziergang zu machen?                                                | 1                          | 2            | 3            | 4           |
| 3. Bereitet es Ihnen Schwierigkeiten, eine <u>kurze</u> Strecke außer Haus zu gehen?                                              | 1                          | 2            | 3            | 4           |
| 4. Müssen Sie tagsüber im Bett liegen oder in einem Sessel sitzen?                                                                | 1                          | 2            | 3            | 4           |
| 5. Brauchen Sie Hilfe beim Essen, Anziehen, Waschen oder Benutzen der Toilette?                                                   | 1                          | 2            | 3            | 4           |

### **Während der letzten Woche:**

|                                                                                            | <b>Überhaupt<br/>nicht</b> | <b>Wenig</b> | <b>Mäßig</b> | <b>Sehr</b> |
|--------------------------------------------------------------------------------------------|----------------------------|--------------|--------------|-------------|
| 6. Waren Sie bei Ihrer Arbeit oder bei anderen tagtäglichen Beschäftigungen eingeschränkt? | 1                          | 2            | 3            | 4           |
| 7. Waren Sie bei Ihren Hobbys oder anderen Freizeitbeschäftigungen eingeschränkt?          | 1                          | 2            | 3            | 4           |
| 8. Waren Sie kurzatmig?                                                                    | 1                          | 2            | 3            | 4           |
| 9. Hatten Sie Schmerzen?                                                                   | 1                          | 2            | 3            | 4           |
| 10. Mussten Sie sich ausruhen?                                                             | 1                          | 2            | 3            | 4           |
| 11. Hatten Sie Schlafstörungen?                                                            | 1                          | 2            | 3            | 4           |
| 12. Fühlten Sie sich schwach?                                                              | 1                          | 2            | 3            | 4           |
| 13. Hatten Sie Appetitmangel?                                                              | 1                          | 2            | 3            | 4           |
| 14. War Ihnen übel?                                                                        | 1                          | 2            | 3            | 4           |

Bitte wenden





## **EORTC QLQ – BR23**

Patienten berichten manchmal die nachfolgend beschriebenen Symptome oder Probleme. Bitte beschreiben Sie wie stark Sie diese Symptome oder Probleme während der letzten Woche empfunden haben.

### **Während der letzten Woche:**

|                                                                                           | <b>Überhaupt</b> |              |              |             |
|-------------------------------------------------------------------------------------------|------------------|--------------|--------------|-------------|
|                                                                                           | <b>nicht</b>     | <b>Wenig</b> | <b>Mäßig</b> | <b>Sehr</b> |
| 31. Hatten Sie einen trockenen Mund?                                                      | 1                | 2            | 3            | 4           |
| 32. War Ihr Geschmacksempfinden beim Essen oder Trinken verändert?                        | 1                | 2            | 3            | 4           |
| 33. Schmerzten Ihre Augen, waren diese gereizt oder tränten sie?                          | 1                | 2            | 3            | 4           |
| 34. Haben Sie Haarausfall?                                                                | 1                | 2            | 3            | 4           |
| 35. Nur bei Haarausfall ausfüllen:<br>Hat Sie der Haarausfall belastet?                   | 1                | 2            | 3            | 4           |
| 36. Fühlten Sie sich krank oder unwohl?                                                   | 1                | 2            | 3            | 4           |
| 37. Hatten Sie Hitzewallungen?                                                            | 1                | 2            | 3            | 4           |
| 38. Hatten Sie Kopfschmerzen?                                                             | 1                | 2            | 3            | 4           |
| 39. Fühlten Sie sich wegen Ihrer Erkrankung oder Behandlung körperlich weniger anziehend? | 1                | 2            | 3            | 4           |
| 40. Fühlten Sie sich wegen Ihrer Erkrankung oder Behandlung weniger weiblich?             | 1                | 2            | 3            | 4           |
| 41. Fanden Sie es schwierig, sich nackt anzusehen?                                        | 1                | 2            | 3            | 4           |
| 42. Waren Sie mit Ihrem Körper unzufrieden?                                               | 1                | 2            | 3            | 4           |
| 43. Waren Sie wegen Ihres künftigen Gesundheitszustandes besorgt?                         | 1                | 2            | 3            | 4           |

### **Während der letzten vier Wochen:**

|                                              | <b>Überhaupt</b> |              |              |             |
|----------------------------------------------|------------------|--------------|--------------|-------------|
|                                              | <b>nicht</b>     | <b>Wenig</b> | <b>Mäßig</b> | <b>Sehr</b> |
| 44. Wie sehr waren Sie an Sex interessiert?  | 1                | 2            | 3            | 4           |
| 45. Wie sehr waren Sie sexuell aktiv?        | 1                | 2            | 3            | 4           |
| Nur ausfüllen, wenn Sie sexuell aktiv waren: |                  |              |              |             |
| 46. Wie weit hatten Sie Freude am Sex?       | 1                | 2            | 3            | 4           |

Bitte wenden



Patientinnen-Nr. ~ Zentrums-Nr. ~

Datum ~

**Während der letzten Woche:**

|                                                                                                             | <b>Überhaupt<br/>nicht</b> | <b>Wenig</b> | <b>Mäßig</b> | <b>Sehr</b> |
|-------------------------------------------------------------------------------------------------------------|----------------------------|--------------|--------------|-------------|
| 47. Hatten Sie Schmerzen in Arm oder Schulter?                                                              | 1                          | 2            | 3            | 4           |
| 48. War Ihr Arm oder Ihre Hand geschwollen?                                                                 | 1                          | 2            | 3            | 4           |
| 49. War das Heben oder Seitwärtsbewegen des Arms erschwert?                                                 | 1                          | 2            | 3            | 4           |
| 50. Hatten Sie im Bereich der betroffenen Brust Schmerzen?                                                  | 1                          | 2            | 3            | 4           |
| 51. War der Bereich Ihrer betroffenen Brust angeschwollen?                                                  | 1                          | 2            | 3            | 4           |
| 52. War der Bereich der betroffenen Brust überempfindlich?                                                  | 1                          | 2            | 3            | 4           |
| 53. Hatten Sie Hautprobleme im Bereich der betroffenen Brust (z.B. juckende, trockene oder schuppige Haut)? | 1                          | 2            | 3            | 4           |

© Copyright 1994 EORTC Study Group on Quality of Life. Alle Rechte vorbehalten. Version 1.0



### 8.3 Eastern Cooperative Oncology Group (ECOG) Performance Status

| <b>Activity Status</b> | <b>Description</b>                                                                                                                                                               |
|------------------------|----------------------------------------------------------------------------------------------------------------------------------------------------------------------------------|
| <b>0</b>               | Asymptomatic, fully active, and able to carry on all predisease performance without restrictions                                                                                 |
| <b>1</b>               | Symptomatic, fully ambulatory but restricted in physically strenuous activity and able to carry out performance of a light or sedentary nature, eg, light housework, office work |
| <b>2</b>               | Symptomatic, ambulatory and capable of all self-care but unable to carry out any work activities. Up and about more than 50 % of waking hours: in bed less than 50 % of day      |
| <b>3</b>               | Symptomatic, capable on only limited self-care, confined to bed or chair more than 50 % of waking hours, but not bedridden                                                       |
| <b>4</b>               | Completely disabled. Cannot carry on any self-care. Totally bedridden                                                                                                            |
| <b>5</b>               | Dead                                                                                                                                                                             |





## 8.4 TNM Staging for Breast Carcinoma

The tumor stage at primary diagnosis will be classified according to the UICC tumor-node-metastasis (TNM) classification(393)

|                           |                                                                                                                                                                                                                                                                                                                                                                                              |
|---------------------------|----------------------------------------------------------------------------------------------------------------------------------------------------------------------------------------------------------------------------------------------------------------------------------------------------------------------------------------------------------------------------------------------|
| Primary tumor (T)         |                                                                                                                                                                                                                                                                                                                                                                                              |
| Tx                        | Primary tumor cannot be assessed                                                                                                                                                                                                                                                                                                                                                             |
| T0                        | No evidence of primary tumor                                                                                                                                                                                                                                                                                                                                                                 |
| Tis                       | Carcinoma in situ                                                                                                                                                                                                                                                                                                                                                                            |
| Tis (DCIS)                | Ductal carcinoma in situ                                                                                                                                                                                                                                                                                                                                                                     |
| Tis (LCIS)                | Lobular carcinoma in situ                                                                                                                                                                                                                                                                                                                                                                    |
| Tis (Paget)               | Paget's disease of the nipple with no tumor<br>Note: Paget's disease associated with a tumor is classified according to the size of the tumor.                                                                                                                                                                                                                                               |
| T1                        | Tumor ≤ 2 cm in greatest dimension                                                                                                                                                                                                                                                                                                                                                           |
| T1mic                     | Micrometastasis ≤ 0.1 cm in greatest dimension                                                                                                                                                                                                                                                                                                                                               |
| T1a                       | Tumor > 0.1 cm but not > 0.5 cm in greatest dimension                                                                                                                                                                                                                                                                                                                                        |
| T1b                       | Tumor > 0.5 cm but not > 1 cm in greatest dimension                                                                                                                                                                                                                                                                                                                                          |
| T1c                       | Tumor > 1 cm but not > 2 cm in greatest dimension                                                                                                                                                                                                                                                                                                                                            |
| T2                        | Tumor > 2 cm but not > 5 cm in greatest dimension                                                                                                                                                                                                                                                                                                                                            |
| T3                        | Tumor > 5 cm in greatest dimension                                                                                                                                                                                                                                                                                                                                                           |
| T4                        | Tumor of any size with direct extension to:<br>(a) chest wall or<br>(b) skin, only as described below                                                                                                                                                                                                                                                                                        |
| T4a                       | Extension to chest wall, not including pectoralis muscle                                                                                                                                                                                                                                                                                                                                     |
| T4b                       | Edeema (including peau d'orange) or ulceration of the skin of the breast, or satellite skin nodules confined to the same breast                                                                                                                                                                                                                                                              |
| T4c                       | Both T4a and T4b                                                                                                                                                                                                                                                                                                                                                                             |
| T4d                       | Inflammatory carcinoma                                                                                                                                                                                                                                                                                                                                                                       |
| Regional lymph nodes (N)  |                                                                                                                                                                                                                                                                                                                                                                                              |
| Nx                        | Regional lymph nodes cannot be assessed (eg, previously removed)                                                                                                                                                                                                                                                                                                                             |
| N0                        | No regional lymph node metastasis                                                                                                                                                                                                                                                                                                                                                            |
| N1                        | Metastasis in movable ipsilateral axillary lymph node(s)                                                                                                                                                                                                                                                                                                                                     |
| N2                        | Metastasis in ipsilateral axillary lymph nodes fixed or matted, or in clinically apparent ipsilateral internal mammary nodes in the absence of clinically evident axillary lymph node metastasis                                                                                                                                                                                             |
| N2a                       | Metastasis in ipsilateral axillary lymph nodes fixed to one another (matted) or to other structures                                                                                                                                                                                                                                                                                          |
| N2b                       | Metastasis only in clinically apparent ipsilateral internal mammary nodes and in the absence of clinically evident axillary lymph node metastasis                                                                                                                                                                                                                                            |
| N3                        | Metastasis in ipsilateral infraclavicular lymph node(s), or in clinically apparent ipsilateral internal mammary lymph node(s) and in the presence of clinically evident axillary lymph node metastasis; or metastasis in ipsilateral supraclavicular lymph node(s) with or without axillary or internal mammary lymph node involvement                                                       |
| N3a                       | Metastasis in ipsilateral infraclavicular lymph node(s) and axillary lymph node(s)                                                                                                                                                                                                                                                                                                           |
| N3b                       | Metastasis in ipsilateral internal mammary lymph node(s) and axillary lymph node(s)                                                                                                                                                                                                                                                                                                          |
| N3c                       | Metastasis in ipsilateral supraclavicular lymph node(s)                                                                                                                                                                                                                                                                                                                                      |
| Regional lymph nodes (pN) |                                                                                                                                                                                                                                                                                                                                                                                              |
| pNx                       | Regional lymph nodes cannot be assessed (eg, previously removed or not removed for pathologic study)                                                                                                                                                                                                                                                                                         |
| pN0                       | No regional lymph node metastasis histologically; no additional examination for isolated tumor cells                                                                                                                                                                                                                                                                                         |
| pN0i-1                    | No regional lymph node metastasis histologically; negative IHC                                                                                                                                                                                                                                                                                                                               |
| pN0i+1                    | No regional lymph node metastasis histologically; positive IHC, no IHC cluster > 0.2 mm                                                                                                                                                                                                                                                                                                      |
| pN1mi-1                   | No regional lymph node metastasis histologically; negative molecular findings (RT-PCR)                                                                                                                                                                                                                                                                                                       |
| pN1mi+1                   | No regional lymph node metastasis histologically; positive molecular findings (RT-PCR)                                                                                                                                                                                                                                                                                                       |
| pN1mi                     | Micrometastasis (> 0.2 mm, none > 2.0 mm)                                                                                                                                                                                                                                                                                                                                                    |
| pN1                       | Metastasis in one to three axillary lymph nodes and/or in internal mammary nodes with microscopic disease detected by sentinel lymph node dissection but not clinically apparent                                                                                                                                                                                                             |
| pN1a                      | Metastasis in one to three axillary lymph nodes                                                                                                                                                                                                                                                                                                                                              |
| pN1b                      | Metastasis in internal mammary nodes with microscopic disease detected by sentinel lymph node dissection but not clinically apparent                                                                                                                                                                                                                                                         |
| pN1c                      | Metastasis in one to three axillary lymph nodes and in internal mammary lymph nodes with microscopic disease detected by sentinel lymph node dissection but not clinically apparent                                                                                                                                                                                                          |
| pN2                       | Metastasis in four to nine axillary lymph nodes, or in clinically apparent internal mammary lymph nodes in the absence of axillary lymph node metastasis                                                                                                                                                                                                                                     |
| pN2a                      | Metastasis in four to nine axillary lymph nodes (at least one tumor deposit > 2.0 mm)                                                                                                                                                                                                                                                                                                        |
| pN2b                      | Metastasis in clinically apparent internal mammary lymph nodes in the absence of axillary lymph node metastasis                                                                                                                                                                                                                                                                              |
| pN3                       | Metastasis in 10 or more axillary lymph nodes, or in infraclavicular lymph nodes, or in clinically apparent ipsilateral internal mammary lymph nodes in the presence of one or more positive axillary lymph nodes; or in more than three axillary lymph nodes with clinically negative microscopic metastasis in internal mammary lymph nodes; or in ipsilateral supraclavicular lymph nodes |
| pN3a                      | Metastasis in 10 or more axillary lymph nodes (at least one tumor deposit > 2.0 mm), or metastasis to the infraclavicular lymph nodes                                                                                                                                                                                                                                                        |
| pN3b                      | Metastasis in clinically apparent ipsilateral internal mammary lymph nodes in the presence of one or more positive axillary lymph nodes; or in more than three axillary lymph nodes and in internal mammary lymph nodes with microscopic disease detected by sentinel lymph node dissection but not clinically apparent                                                                      |
| pN3c                      | Metastasis in ipsilateral supraclavicular lymph nodes                                                                                                                                                                                                                                                                                                                                        |
| Distant metastasis (M)    |                                                                                                                                                                                                                                                                                                                                                                                              |
| Mx                        | Distant metastasis cannot be assessed                                                                                                                                                                                                                                                                                                                                                        |
| M0                        | No distant metastasis                                                                                                                                                                                                                                                                                                                                                                        |
| M1                        | Distant metastasis                                                                                                                                                                                                                                                                                                                                                                           |



## 8.5 Informed Consent Document (German)

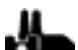

## Patienteninformation

zur Teilnahme an der Studie mit dem Namen

**Multizentrische, prospektiv randomisierte Phase III Studie  
zum Vergleich von FEC-Doc-Chemotherapie versus FEC-  
DocG-Chemotherapie, sowie 2 oder 5 Jahre  
Zoledronattherapie in der adjuvanten Therapie von  
Patientinnen mit Brustkrebs:  
SUCCESS-STUDIE**

(A Prospectively Randomized Phase III Trial, studying the benefits of adjuvant sequential vs. combined taxan based chemotherapy and different durations of Zoledronate treatment in early breast cancer: SUCCESS-Trial)

Patientenaufkleber

### **Sehr geehrte Patientin,**

bei Ihnen wurde eine Brustkrebserkrankung festgestellt und inzwischen erfolgreich operativ behandelt. Trotz der Entfernung dieses bösartigen Tumors ist nicht mit letzter Sicherheit garantiert, dass nicht noch vereinzelt Tumorzellen an unbekanntem Stellen Ihres Körpers ruhen. Es soll deshalb routinemäßig eine Behandlung mit so genannten Zytostatika, also Medikamenten zur Hemmung der Zellteilung, durchgeführt werden. Dies wird Chemotherapie genannt und dient als vorbeugende Therapie dem Ziel, das Risiko für ein späteres Wiederauftreten der Erkrankung zu verringern. Das Prinzip der Behandlung mit so genannten Zytostatika ist die Hemmung der Zellteilung, die bei einem bösartigen Tumor in großem Maß und ungeordnet abläuft. Dadurch werden von dieser Therapie vor allem Tumorzellen betroffen, in geringerem Ausmaß jedoch auch gesunde Körperzellen, woraus sich die meisten der unten erläuterten Nebenwirkungen ergeben. Weist der bei Ihnen festgestellte Tumor bestimmte Eigenschaften auf, wird bei Ihnen automatisch zusätzlich eine antihormonelle Therapie (endokrine Therapie) und/oder eine Antikörpertherapie (mit Trastuzumab) durchgeführt, die der Standardtherapie außerhalb dieser Studie entspricht. In der SUCCESS-Studie soll eine neue Kombination von Zytostatika (FEC-DG) mit einer Standardtherapie (FEC-D) verglichen werden. Zusätzlich wird in der Studie die unterschiedliche Dauer einer Behandlung mit einem sog. Bisphosphonat untersucht, eine Medikamentengruppe,



welche aus der Osteoporosebehandlung bei Patientinnen mit einer Verminderung der Knochendichte bekannt ist, und die bisher noch nicht routinemäßig bei der Primärbehandlung von Brustkrebs eingesetzt wird. Ferner ist zu vier verschiedenen Zeitpunkten die Entnahme von jeweils 50ml Blut geplant, dessen Untersuchung der Erforschung von Möglichkeiten dient, Tumorreste frühzeitig festzustellen.

Wir bieten Ihnen an, die Verabreichung dieser Medikamente im Rahmen einer wissenschaftlichen Therapieoptimierungsstudie durchzuführen. Alle in der Studie eingesetzten Medikamente haben ihre Wirksamkeit bei der Brustkrebserkrankung bereits erwiesen. Ziel der Untersuchung ist nun festzustellen, welche der Kombinationen in einem Ihrer Situation vergleichbaren Tumorstadium bessere Ergebnisse erzielt.

Insgesamt sollen ca. 3.500 Patientinnen deutschlandweit im Rahmen dieser Studie untersucht werden. Wenn Sie sich zur Teilnahme an dieser Untersuchung entscheiden, werden Sie nach dem Zufallsprinzip einer von vier Patientinnengruppen zugeordnet, um Unterschiede im Behandlungserfolg zwischen den untersuchten Therapien möglichst unbeeinflusst von vorbestehenden Einflussfaktoren feststellen zu können. Diese Zuordnung wird computergesteuert von einem zentralen Statistikinstitut vorgenommen und kann nicht von Ihrem behandelnden Arzt beeinflusst werden:

***FEC-D-Behandlungsarm mit anschließender zweijähriger***

***Zoledronatbehandlung:*** Sie erhalten zunächst 3 Zyklen einer Chemotherapie mit den Substanzen Cyclophosphamid, Epirubicin und Fluorouracil im Abstand von jeweils 3 Wochen. Anschließend erhalten Sie 3 Zyklen der Substanz Docetaxel, ebenfalls im Abstand von jeweils 3 Wochen. Die geplante Therapiedauer der Chemotherapie beträgt somit insgesamt 18 Wochen. Beginnend 4 Wochen nach dem letzten Chemotherapiezyklus erhalten Sie in vierteljährlichen Abständen das Bisphosphonat Zoledronat für die Dauer von zwei Jahren. All diese Medikamente werden als Infusionstherapie verabreicht.

***FEC-D-Behandlungsarm mit anschließender fünfjähriger***

***Zoledronatbehandlung:*** Sie erhalten zunächst 3 Zyklen einer Chemotherapie mit den Substanzen Cyclophosphamid, Epirubicin und Fluorouracil im Abstand von jeweils 3 Wochen. Anschließend erhalten Sie 3 Zyklen der Substanz Docetaxel, ebenfalls im Abstand von jeweils 3 Wochen. Die geplante Therapiedauer der Chemotherapie beträgt somit insgesamt 18 Wochen. Beginnend 4 Wochen nach dem letzten Chemotherapiezyklus erhalten Sie in vierteljährlichen Abständen das Bisphosphonat Zoledronat für die Dauer von zwei Jahren. Daran anschließend erhalten Sie zweimal im Jahr die Zoledronatgaben für weitere 3 Jahre. All diese Medikamente werden als Infusionstherapie verabreicht.

***FEC-DG-Behandlungsarm mit anschließender zweijähriger***

***Zoledronatbehandlung:*** Sie erhalten zunächst 3 Zyklen einer Chemotherapie mit den Substanzen Cyclophosphamid, Epirubicin und Fluorouracil im Abstand von jeweils 3 Wochen. Anschließend erhalten Sie 3 Zyklen der beiden Substanzen Docetaxel und Gemcitabine, ebenfalls im Abstand von jeweils 3 Wochen. Die



geplante Therapiedauer der Chemotherapie beträgt somit insgesamt 18 Wochen. Beginnend 4 Wochen nach dem letzten Chemotherapiezyklus erhalten Sie in vierteljährlichen Abständen das Bisphosphonat Zoledronat für die Dauer von zwei Jahren. All diese Medikamente werden als Infusionstherapie verabreicht.

**FEC-DG-Behandlungsarm mit anschließender fünfjähriger**

**Zoledronatbehandlung:** Sie erhalten zunächst 3 Zyklen einer Chemotherapie mit den Substanzen Cyclophosphamid, Epirubicin und Fluorouracil im Abstand von jeweils 3 Wochen. Anschließend erhalten Sie 3 Zyklen der beiden Substanzen Docetaxel und Gemcitabine, ebenfalls im Abstand von jeweils 3 Wochen. Die geplante Therapiedauer der Chemotherapie beträgt somit insgesamt 18 Wochen. Beginnend 4 Wochen nach dem letzten Chemotherapiezyklus erhalten Sie in vierteljährlichen Abständen das Bisphosphonat Zoledronat für die Dauer von zwei Jahren. Daran anschließend erhalten Sie zweimal im Jahr die Zoledronatgaben für weitere 3 Jahre. All diese Medikamente werden als Infusionstherapie verabreicht. Die Behandlungsmöglichkeiten innerhalb der Studie können schematisch so dargestellt werden:

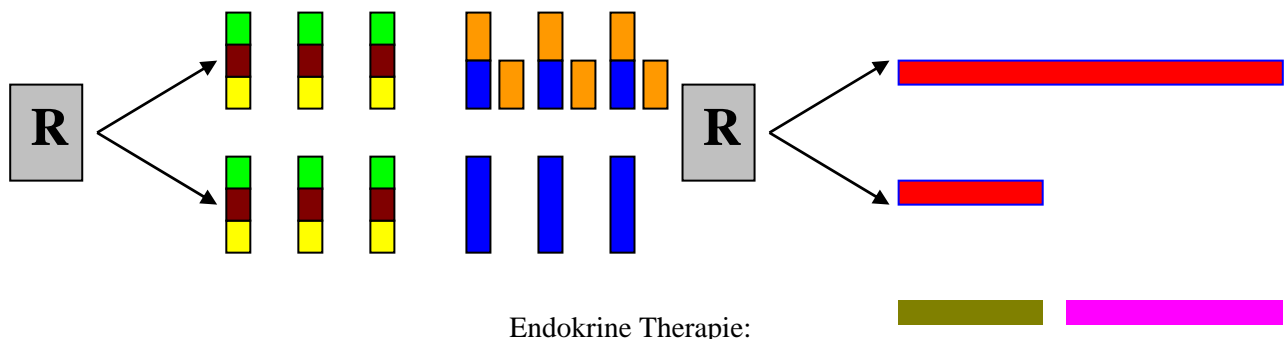

Zusätzlich erhalten Sie von uns während der Infusionstherapie Medikamente (Dexamethason und Navoban), die die im Rahmen der Chemotherapie auftretende Übelkeit in der Mehrzahl der Fälle lindern.

Zusätzlich erhalten Sie von uns während der Infusionstherapie Medikamente (Dexamethason und Navoban), die die im Rahmen der Chemotherapie auftretende Übelkeit in der Mehrzahl der Fälle lindern.

Vor Beginn der Chemotherapie sind einige Untersuchungen nötig, um zu überprüfen, ob diese Therapie für Sie geeignet ist. Deshalb werden wir, falls diese Untersuchungen bei Ihnen nicht bereits vorliegen, eine Ultraschalluntersuchung der Leber, ein EKG, eine Röntgenaufnahme der Lunge, eine Skelettszintigraphie und eine Blutuntersuchung durchführen.

Vor Beginn und nach Ende der Chemotherapie und nach zwei bzw. fünf Jahren der Zoledronatbehandlung werden wir Ihr Blut einer besonders sorgfältigen Untersuchung unterziehen, um verstreute Tumorzellen im Blut oder andere Hinweise



für ein erhöhtes Risiko für eine Wiederkehr der Erkrankung nachzuweisen. Diese Untersuchungen beinhalten die Suche nach isolierten Tumorzellen, Untersuchungen der Genstruktur von Blutzellen, die Bestimmung von so genannten Tumormarkern, also Stoffe im Blut, die auf eine Ausweitung des Tumorgeschehens hinweisen, sowie weitere Untersuchungsschritte, die womöglicherweise geeignet sind, eine Wiederkehr der Erkrankung frühzeitiger als bisher zu erkennen. Sollten sich bei der Blutuntersuchung Hinweise auf einen Rückfall ergeben, werden wir Ihren behandelnden Arzt informieren. Ab diesem Zeitpunkt sollte eine intensiviertere Nachsorge mittels bildgebender Verfahren erfolgen.

Diese Untersuchungen werden innerhalb der Studienteilnahme auf kostenloser und freiwilliger Basis durchgeführt. Sie können zu jedem Zeitpunkt unabhängig von der weiteren Studienteilnahme die Blutabnahme ablehnen, oder Ihre Zustimmung zur Untersuchung der Blutproben und/oder die Verwertung der gewonnenen wissenschaftlichen Erkenntnisse zurückziehen. Die von Ihnen im Rahmen dieser Studie entnommenen Blutproben werden ebenfalls mit einer beim Prüfarzt befindlichen Kennziffer verschlüsselt. Die erhobenen Daten dienen ausschließlich der Untersuchung der oben genannten wissenschaftlichen Fragestellung und unterliegen den gleichen datenschutzrechtlichen Bestimmungen, wie die Daten zu Ihrem Krankheitsverlauf.

Sie haben das Recht, Auskunft über die Sie betreffenden aufgezeichneten Angaben und die Ergebnisse Ihrer Untersuchung bzw. Behandlung zu verlangen, soweit dies nicht aus technischen Gründen niemandem mehr möglich ist. Sie können bei unrichtiger Aufzeichnung von Angaben, die Ihre Person betreffen, auch eine Berichtigung dieser Angaben verlangen.

Sollten Sie einer Weiterverarbeitung Ihrer Daten widersprechen, werden keine weiteren Daten über Ihre Person zum Zweck der o.g. Studie erhoben und aufgezeichnet. Die bis zu diesem Zeitpunkt vorhandenen Daten müssen aber möglicherweise aus Gründen der Sicherheit anderer Studienteilnehmer/-innen und der Wahrung gesetzlicher Dokumentationspflichten weiter verarbeitet werden. Gleiches gilt für eine von Ihnen verlangte Löschung der Sie betreffenden Angaben.

Sie erhalten während der Therapie und im weiteren Verlauf einen Fragebogen, den Sie selbständig und in Ruhe ausfüllen sollten. Er dient der Erhebung der Lebensqualität während der Behandlung und dient damit der Auswertung zum Vergleich beider Therapiearme.

Zwischen den Zyklen sollten Sie mindestens 1mal pro Woche eine Blutbildbestimmung bei Ihrem Hausarzt durchführen lassen.

Sofern Sie sich im empfängnisfähigen Alter befinden, wird bei Ihnen vor Beginn der Chemotherapie und vier Wochen nach Ende der Chemotherapie ein Schwangerschaftstest durchgeführt. Für die gesamte Dauer der Behandlung muss auf eine sichere Schwangerschaftsverhütung geachtet werden, da die eingesetzten Medikamente stark schädigend für das ungeborene Kind sein können. Als sichere Methoden der Schwangerschaftsverhütung gelten die verschiedenen Formen der hormonellen Empfängnisverhütung, intrauterine Pessare (Spirale) oder eine operative Eileiterunterbindung. Informieren Sie bitte unverzüglich Ihren



behandelnden Arzt, wenn sich zu irgendeinem Zeitpunkt der Behandlung der Verdacht auf eine ungewollte Schwangerschaft ergeben sollte.

Die Teilnahme an dieser Studie ist völlig freiwillig und Sie können jederzeit von der Zusage der Teilnahme zurücktreten. In diesem Falle wird Sie der behandelnde Arzt nach bestem Wissen und Gewissen weiterbehandeln. Es entstehen Ihnen hierdurch keinerlei Nachteile.

Sollten bei Ihnen zu irgendeinem Zeitpunkt Hinweise auf eine Unverträglichkeit der Therapie oder ein Fortschreiten des Tumornwachstums auftreten, so kann die Therapie selbstverständlich abgebrochen werden.

Auch nach Beendigung der Behandlung werden wir Sie gerne weiter betreuen, und eine regelmäßige Tumornachsorge durchführen. Sollten Sie die Nachsorge außerhalb unseres Zentrums durchführen, so werden wir in regelmäßigen Abständen entweder Ihren Hausarzt, den behandelnden Facharzt oder Sie selbst kontaktieren, um den weiteren Verlauf Ihrer Krankheit zu überprüfen. Während der nächsten drei Jahre sollten Sie in 3-monatigen Abständen eine Nachsorgeuntersuchung vornehmen lassen.

Es konnte wissenschaftlich gezeigt werden, dass die Teilnahme an einer Therapiestudie für die einzelne Patientin mit einer Prognoseverbesserung verbunden sein kann, hauptsächlich durch bessere Therapieüberwachung bedingt. Außerdem können so wichtige Erkenntnisse für die Behandlung zukünftiger Patientinnen gesammelt werden.

Ihre persönlichen Daten und Angaben zur Ihrer Erkrankung werden zur wissenschaftlichen Auswertung gesammelt. Sollte dies notwendig sein, so wird zur Verschwiegenheit verpflichteten Mitarbeitern gemäß den Bedingungen des Bundesdatenschutzgesetzes Einblick in Ihre Krankenakte gewährt.

Unter der Behandlung mit der **Chemotherapie** können, auch unabhängig von der Teilnahme an der Studie, folgende **Nebenwirkungen** auftreten:

- Absinken der Zahl der Blutzellen (rote und weiße Blutkörperchen, Blutplättchen). Wir werden uns bemühen, durch entsprechende Medikamente (Wachstumsfaktorspritzen) einem zu starken Absinken der weißen Blutkörperchen vorzubeugen. In seltenen Fällen kann es zu Fieber, Infektionen, Müdigkeit oder Blutungsneigung kommen. In solchen Fällen kann eine Gabe von Blutprodukten, Antibiotika oder anderen Medikamenten notwendig werden.
- Übelkeit und Erbrechen. Dies lässt sich durch die Gabe entsprechender Begleitmedikation in der Mehrzahl der Fälle verhindern.
- Unter Epirubicin können Nebenwirkungen am Herzen auftreten, die zu einer behandlungsbedürftigen oder lebensgefährlichen Herzschwäche führen können. Deshalb wird vor der Behandlung Ihre Herzfunktion überprüft, um ein erhöhtes Risiko für eine Herzschädigung erkennen zu können.
- Elektrolytverschiebungen (Natrium, Kalium, Kalzium etc.) und eine Erhöhung der Harnsäure.
- Haarverlust. Der Haarverlust ist in der Mehrzahl der Fälle bei der bei Ihnen



vorgesehen Chemotherapie vollständig, ein künstlicher Haarersatz wird notwendig sein. Nach Ende der Behandlung setzt das Haarwachstum wieder ein.

- Vorübergehende Beschwerden in den Gelenken und Muskeln
- In seltenen Fällen können in Folge der Chemotherapie Zweitkarzinome des blutbildenden Systems auftreten.
- Veränderungen an Zehen- und Fingernägeln sowie Hautveränderungen. Die Veränderungen können zu Nagelablösungen, sowie, in seltenen Fällen, zu chronischen Infektionen im Bereich der Hände und Füße führen.
- Gelegentliche Missempfindungen (wie Kribbeln) und Taubheit an Händen und Füßen, die aber meist nur kurzfristig auftreten.
- Häufige Wassereinlagerungen (sog. Ödeme), die sich durch Schwellung vor allem der Beine, selten auch anderer Körperteile äußern. Selten treten diese Wassereinlagerungen so stark auf, dass sie auch zu Flüssigkeitsansammlungen in Lunge und Bauchraum führen. Wir werden Ihnen je nach Ausprägungsgrad der Wassereinlagerungen Medikamente zur deren Verringerung verabreichen.

Unter der Behandlung mit der **Zoledronat** können, auch unabhängig von der Teilnahme an der Studie, folgende **Nebenwirkungen** auftreten:

- Vorübergehendes Fieber mit grippeähnlichen Beschwerden
- Übelkeit, Kopfschmerzen, Unruhe und Schlafstörungen
- Bindehautentzündung der Augen
- Vorübergehende Beschwerden in den Gelenken und Muskeln
- Bluthochdruck
- Mildes Absinken der Zahl der Blutzellen (rote und weiße Blutkörperchen, Blutplättchen) und Veränderung von einer Reihe von Blutwerten
- Funktionsstörung der Nieren
- In seltenen Fällen kann es zu einer ernstzunehmenden Schädigung von Zahnfleisch und Kieferknochen kommen, die eine Mund-Kiefer-Gesichtschirurgische Behandlung notwendig machen kann.

Die Behandlung mit Zoledronat ist insgesamt aber wesentlich besser verträglich, als die vorhergehende Chemotherapie. Dennoch sollten Sie eine Reihe von Vorsichtsmaßnahmen vor Beginn und während der Therapie mit Zoledronat beachten. Diese sind in einem gesonderten Merkblatt zusammengefasst, welches Ihnen mit dieser Patientinneninformation ausgehändigt wird.

Entweder nach Abschluss oder nach der Hälfte der Chemotherapie wird bei Ihnen außerdem eine Bestrahlung des Brustdrüsenkörpers oder der Brustwand und gegebenenfalls der Lymphknotenabflussgebiete voraussichtlich erforderlich sein. Ob dies notwendig ist, und ggf. den genauen Zeitpunkt wird Ihnen Ihr betreuender Arzt mitteilen. Die Bestrahlung wird dabei täglich über den Zeitraum von sechs bis sieben Wochen durchgeführt. Als mögliche Nebenwirkungen können während der Strahlentherapie Hautreizungen, Gewebswasseransammlungen mit Schwellung des bestrahlten Gebietes, und Allgemeinsymptome, wie Müdigkeit, Kopfschmerzen, Übelkeit und Erbrechen auftreten. Über diese Nebenwirkungen werden Sie von Ihrem betreuenden Arzt (Strahlentherapeut) noch gesondert ausführlich aufgeklärt





werden.

Unabhängig davon, welchem Therapiearm Sie zugeordnet werden, halten wir unter bestimmten Voraussetzungen die zusätzliche Behandlung mit Medikamenten (Tamoxifen, und evtl. Goserelin bzw. Anastrozol) gegen Hormonwirkungen in Ihrem Körper für sinnvoll. Wenn bei Ihrem Tumor eine Empfindlichkeit gegenüber weiblichen Geschlechtshormonen (Östrogenen) festgestellt wurde, empfehlen wir Ihnen auf jeden Fall die Einnahme des antihormonellen Medikaments Tamoxifen in Form einer Tablette täglich über die Dauer von 2 Jahren, sowie anschließend die Behandlung mit Anastrozol in Form einer Tablette täglich über die Dauer von weiteren 3 Jahren. Ob dies der Fall ist, wird Ihnen Ihr betreuender Arzt mitteilen. Als mögliche **Nebenwirkungen** einer Therapie mit **Tamoxifen** können Wechselbeschwerden, wie Hitzewallungen, depressive Verstimmungen, Leistungsminderung und Schlaflosigkeit auftreten. Das grundsätzlich sehr geringe Risiko für eine bösartige Erkrankung der Gebärmutter schleimhaut kann sich minimal erhöhen. Unter der Therapie mit Anastrozol können Wechselbeschwerden, Übelkeit und eine Verminderung der Knochendichte bis hin zu Knochenbrüchen auftreten. Wenn bei Ihrem Tumor eine Empfindlichkeit gegenüber weiblichen Geschlechtshormonen (Östrogenen) festgestellt wurde, und Sie unter 40 Jahre alt sind, oder eine nach der Chemotherapie wiedereinsetzende Periodenblutung haben werden, oder Ihre Hormonwerte auf eine aktive Funktion Ihrer Eierstöcke hindeuten, empfehlen wir Ihnen auf jeden Fall zusätzlich das antihormonelle Medikament Goserelin als monatliche Spritze über die Dauer von 2 Jahren. Dieses Medikament führt fast immer zu einem Ausbleiben der monatlichen Regelblutung. Als mögliche **Nebenwirkungen** einer Therapie mit **Goserelin** können Blutungsstörungen, Wechselbeschwerden, wie Hitzewallungen, depressive Verstimmungen, Leistungsminderung und Schlaflosigkeit auftreten.

Sollte es durch die Chemotherapie zu einem starken Abfall von weißen oder roten Blutkörperchen kommen, so wird Ihnen Ihr Arzt unabhängig vom Therapiearm eine unterstützende Behandlung mit Wachstumsfaktoren empfehlen. Diese Medikamente sind in der Regel in der Lage die Produktion der Blutkörperchen zusätzlich anzuregen. Die Vor- und Nachteile einer solchen Behandlung und die möglichen Nebenwirkungen besprechen Sie bitte mit Ihrem behandelnden Arzt.

Wir haben zu Ihrem zusätzlichen Schutz eine gesonderte Probandenversicherung (Versicherungs-Nr. 20-003245-03123-390) bei HDI Industrie Versicherung AG Niederlassung Hamburg, Großer Burstah 45, 20457 Hamburg, Telefon 040 36150236, Fax 040 36150226 abgeschlossen. Um den Versicherungsschutz nicht zu gefährden, dürfen Sie sich einer anderen Behandlung nur im Einverständnis mit dem Prüfarzt unterziehen (Notfälle ausgenommen) und sollen jede Änderung, insbesondere eine Verschlechterung des Gesundheitszustandes, die als Folge der klinischen Prüfung aufgetreten sein könnte, unverzüglich dem Prüfarzt und dem Versicherer mitteilen.

Diese Studie wurde von der Ethikkommission des Studienleitzentrums (Ludwig-Maximilians-Universität München) begutachtet und zur klinischen Durchführung freigegeben.

**Nur die Prüfer, besonders geschulte Monitore, die die korrekte Dokumentation**



**der Daten überwachen, sowie autorisierte Personen in- und ausländischer Gesundheitsbehörden haben im Rahmen der entsprechenden gesetzlichen Vorschriften Zugang zu den vertraulichen Daten, in denen Sie namentlich genannt werden. Diese Personen unterliegen der Schweigepflicht und sind zur Beachtung des Datenschutzes verpflichtet. Die Weitergabe der Daten im In- und Ausland erfolgt ausschließlich zu statistischen und wissenschaftlichen Zwecken, und Sie werden darin ausnahmslos nicht namentlich genannt. Auch in etwaigen Veröffentlichungen der Daten dieser klinischen Prüfung werden Sie nicht namentlich genannt.**

Bevor wir Ihnen zur Behandlung raten, haben wir die Vorteile der Behandlung sorgfältig gegen mögliche Nachteile abgewogen. Wir sind bemüht die Nebenwirkungen der Therapie durch entsprechende Maßnahmen so gering wie möglich zu halten, und werden Sie kontinuierlich beraten, welchen Beitrag Sie durch Ihr Verhalten dazu leisten können. Sollten sich im Laufe Ihrer Behandlung neue Erkenntnisse ergeben, die eine Weiterführung der Therapie beeinflussen könnten, so werden wir Sie darüber informieren. Wir stehen Ihnen jederzeit für Fragen zur Verfügung.

Dieser Aufklärungsbogen dient Ihrer Information. Sie sollten ihn behalten und bei Ihren Unterlagen aufbewahren.

**Name(n) des/der Ansprechpartner für die Studie an Ihrem Krankenhaus:**

\_\_\_\_\_

\_\_\_\_\_

**Telefonnummern, unter denen die Ansprechpartner erreicht werden können:**

\_\_\_\_\_

\_\_\_\_\_

\_\_\_\_\_  
Name der Patientin

\_\_\_\_\_  
Unterschrift der Patientin

\_\_\_\_\_  
Ort/Datum

\_\_\_\_\_  
Name des aufklärenden Arztes

\_\_\_\_\_  
Unterschrift der Ärztin/des Arztes

\_\_\_\_\_  
Ort/Datum





## Einwilligungserklärungen zum Datenschutz

zur Teilnahme an der Studie mit dem Namen

**Multizentrische, prospektiv randomisierte Phase III Studie zum Vergleich von FEC-Doc-Chemotherapie versus FEC-DocG-Chemotherapie, sowie 2 oder 5 Jahre Zoledronattherapie in der adjuvanten Therapie von Patientinnen mit Brustkrebs: SUCCESS-STUDIE**

(A Prospectively Randomized Phase III Trial, studying the benefits of adjuvant sequential vs. combined taxan based chemotherapy and different durations of Zoledronate treatment in early breast cancer: SUCCESS-Trial)

Bei wissenschaftlichen Studien werden persönliche Daten und medizinische Befunde über Sie erhoben.

Die Weitergabe, Speicherung und Auswertung dieser studienbezogenen Daten erfolgt nach gesetzlichen Bestimmungen und setzt vor Teilnahme an der Studie folgende freiwillige Einwilligung voraus:

Sie werden nach dem Zufallsprinzip einer von vier Behandlungsgruppen zugeordnet. Diese Zuordnung wird von einem beauftragten Unternehmen\*\* vorgenommen und kann nicht von Ihrem behandelnden Arzt beeinflusst werden.

Ich erkläre mich damit einverstanden, dass im Rahmen dieser Studie erhobene Daten/ Angaben über meine Gesundheit auf Fragebögen und elektronischen Datenträgern aufgezeichnet und ohne Namensnennung, nur unter Angabe des Geburtsjahres und einer vierstelligen Nummer (pseudonymisiert), weitergegeben werden an:

- a) den Auftraggeber (Sponsor)\* oder beauftragte Unternehmen\*\* der Studie zur wissenschaftlichen Auswertung, Bewertung von unerwünschten Ereignissen und/ oder Beantragung der Zulassung;
- b) die zuständige(n) Überwachungsbehörden(n) (Landesamt oder Bezirksregierung), Bundesoberbehörde (Bundesinstitut für Arzneimittel und Medizinprodukte, Bonn), Ethik-Kommission und ausländischen Behörden und europäische Datenbanken zur Überprüfung der ordnungsgemäßen Durchführung der Studie sowie zur Bewertung von Studienergebnissen und unerwünschter Ereignisse oder zur Beantragung der Zulassung.

\*Anschrift des Auftraggebers: Prof. Dr. H.Sommer  
Klinikum der Universität München  
I. Frauenklinik-Innenstadt  
Maistraße 11  
80337 München

\*\*Anschrift beauftragter Unternehmen: Alcedis GmbH  
Winchesterstraße 2  
35394 Gießen



Außerdem erkläre ich mich damit einverstanden, dass ein autorisierter und zur Verschwiegenheit verpflichteter Beauftragter des Auftraggebers, der zuständigen inländischen und ausländischen Überwachungs- und Zulassungsbehörden in meine beim Prüfarzt vorhandenen personenbezogenen Daten Einsicht nimmt, soweit dies für die Überprüfung der Studie notwendig ist. Für diese Maßnahme entbinde ich den Prüfarzt von der ärztlichen Schweigepflicht.

Die Einwilligung zur Erhebung und Verarbeitung der Angaben über meine Gesundheit ist unwiderruflich. Ich bin bereits darüber aufgeklärt worden, dass ich jederzeit die Teilnahme an der klinischen Prüfung beenden kann. Im Fall dieses Widerrufs werden die bis zu diesem Zeitpunkt gespeicherten Daten ohne Namensnennung weiterhin verwendet, soweit dies erforderlich ist, um

- a) Wirkungen des zu prüfenden Arzneimittels festzustellen,
- b) sicherzustellen, dass schutzwürdige Interessen meiner Person nicht beeinträchtigt werden,
- c) der Pflicht zur Vorlage vollständiger Zulassungsunterlagen zu genügen.

Darüber hinaus bin ich mit der Entnahme, Herauslösung, Untersuchung sowie verschlüsselten Lagerung meines im Rahmen dieser klinischen Studie entnommenen Blutes und Gewebes für den Zweck der Studie durch den/die Studienarzt/-Studienärztin einem Labor der Klinik einverstanden. Ich bin einverstanden, dass das im Rahmen der Studie entnommene Blut ausschließlich im Rahmen der in der Einverständniserklärung geschilderten wissenschaftlichen Untersuchungen in Laboratorien der an der Success-Studie beteiligten Universitätskliniken analysiert wird. Die oben genannten datenschutzrechtlichen Bestimmungen gelten auch für alle Daten, die in Zusammenhang mit diesen Untersuchungen erhoben und gespeichert werden.

Wenn ich nicht in die Weitergabe meiner pseudonymisierten Daten einwillige, werde ich nicht in die klinische Prüfung eingeschlossen.

\_\_\_\_\_

Name der Patientin

Unterschrift der Patientin

Ort/Datum

Hiermit erkläre ich, den/die o. g. Versuchsteilnehmer/in über Wesen, Bedeutung, Tragweite und Risiken der o. g. Studie mündlich und schriftlich aufgeklärt und ihm/ihr eine Ausfertigung der Information sowie dieser Einwilligungserklärung übergeben zu haben.

\_\_\_\_\_

Name des aufklärenden Arztes Unterschrift der Ärztin/des Arztes

Ort/Datum



# 8.6 Ethical board review

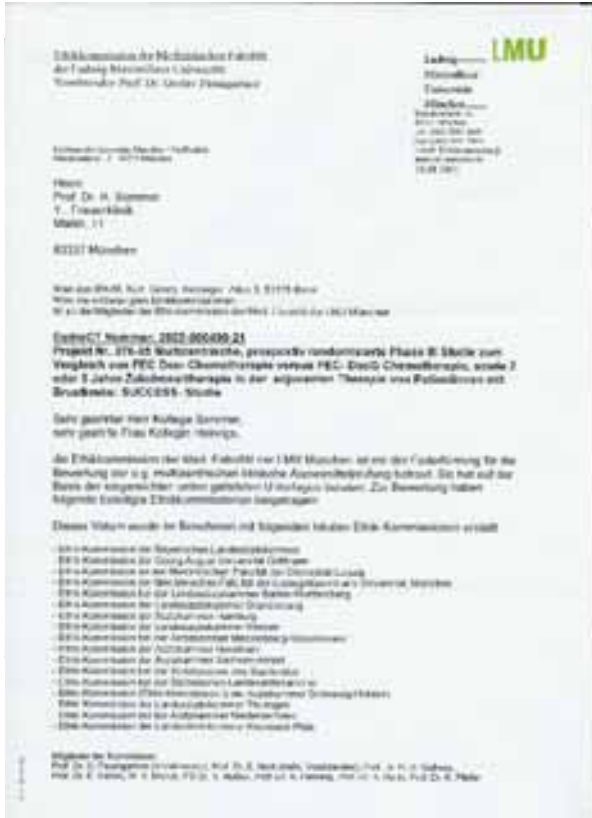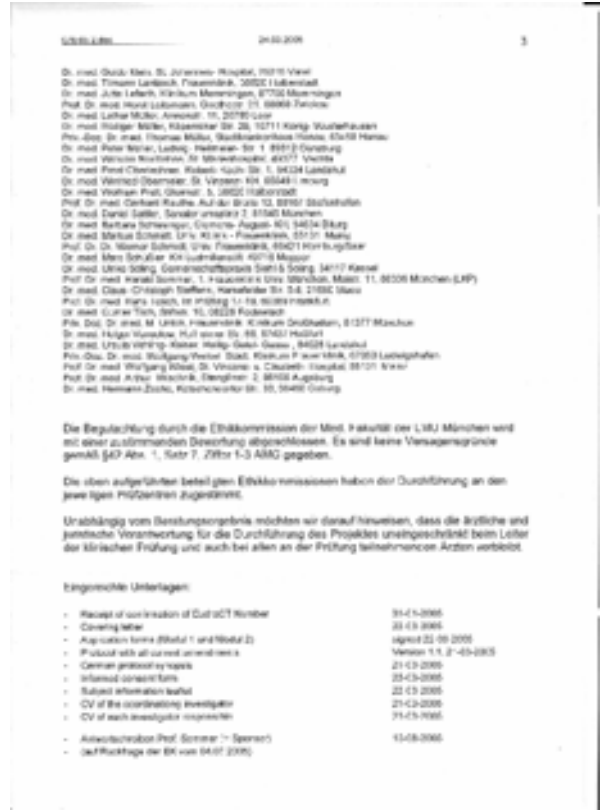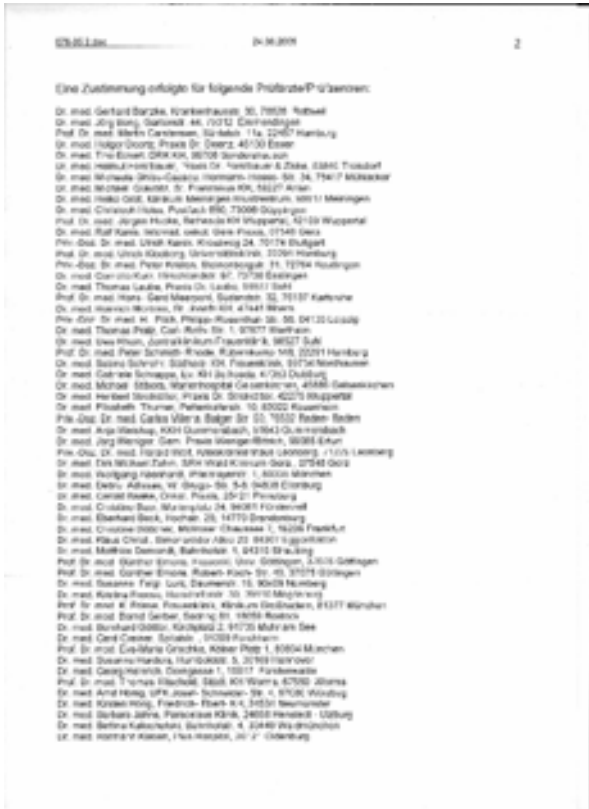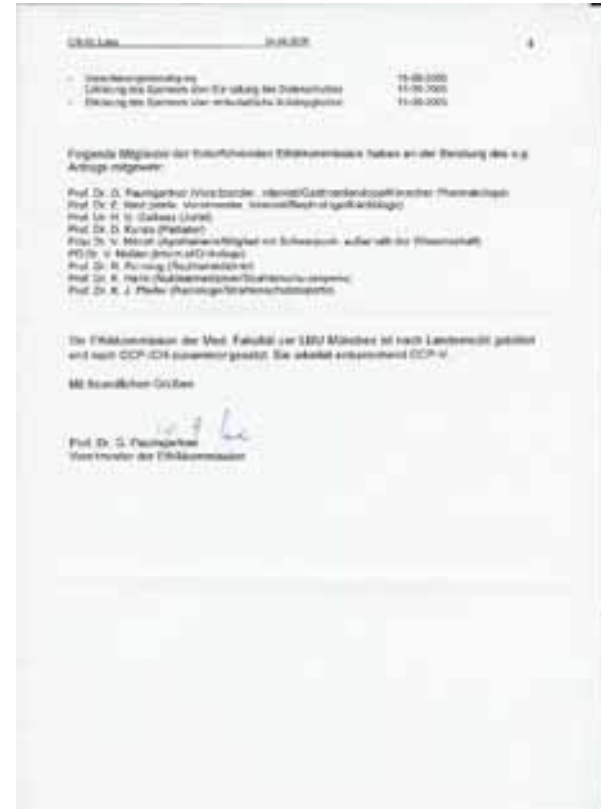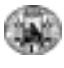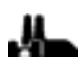

## 8.7 Insurance policy

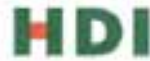

INDUSTRIE VERSICHERUNG

### Versicherungsbestätigung

Probandenversicherung Nr. : 20003245-03123-390-0000000  
AstraZeneca-Projekt-Nr. : 1033EX/0010  
EudraCT-Nr. : n. n.  
  
Versicherungsnehmer : AstraZeneca GmbH  
Tinsdaler Weg 163  
22880 Wedel  
  
Weiterer  
Versicherungsnehmer : Prof. Dr. Harald Sommer  
I. Universitätsfrauenklinik  
der LMU Innenstadt  
Maistraße 11, D-80337 München  
Deutschland  
  
Versicherungsbeginn : 01.08.2005  
Versicherungsablauf : 01.01.2015 (voraussichtlich)

Das Versicherungsverhältnis gilt für die Dauer der versicherten Studie mit dem Titel

Multizentrische prospektiv randomisierte Phase III Studie zum Vergleich von FEC-Doc-Chemotherapie versus FEC-DocO-Chemotherapie, sowie 2 oder 5 Jahre Zoledronattherapie in der adjuvanten Therapie von Patientinnen mit Brustkrebs

Für den Versicherungsnehmer besteht Versicherungsschutz für Gesundheitsschädigungen, die bei einer vom Versicherungsnehmer durchgeführten oder veranlassten klinischen Prüfung eines Arzneimittels die Folge von den bei der klinischen Prüfung angewandten Arzneimitteln und/oder Stoffen sind sowie durch Maßnahmen, die an dem Körper des Versicherten im Zusammenhang mit der klinischen Prüfung des Arzneimittels durchgeführt werden.

Je versicherte Person bilden EUR 500.000,00 die Höchstgrenze für die Leistung des Versicherers.

Die Höchstersatzleistung für alle Versicherungsfälle aus der klinischen Prüfung eines Arzneimittels beträgt

|                   |               |              |                |
|-------------------|---------------|--------------|----------------|
| EUR 5.000.000,00  | wenn          | bis zu       | 1.000 Personen |
| EUR 10.000.000,00 | wenn mehr als | 1.000 bis zu | 3.000 Personen |
| EUR 15.000.000,00 | wenn mehr als | 3.000        | Personen       |

an der klinischen Prüfung teilnehmen; hier 3650 Patienten. Die Leistungen des Versicherers für die einzelnen versicherten Personen ermäßigen sich im entsprechenden Verhältnis, wenn die Summe der einzelnen Versicherungsleistungen diesen Höchstbetrag überschreiten würde.

Die Höchstersatzleistung für alle Versicherungsfälle aus den im Versicherungsjahr begonnenen klinischen Prüfungen von Arzneimitteln beträgt EUR 25.000.000,00.

Hamburg, 13.07.2005, HH-B, ris

HDI Industrie Versicherung AG

  
HDI Industrie Versicherung AG, Versicherten der Auftragsnr. 20003245-03123-390-0000000  
Hamburg, 13.07.2005, HH-B, ris  
HDI Industrie Versicherung AG, Versicherten der Auftragsnr. 20003245-03123-390-0000000  
Hamburg, 13.07.2005, HH-B, ris

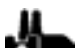

SUCCESS-Trial, Version 1.2, 15.8.2005

Page 158

Anschrift: D-80337 München • Maistraße 11 • Telefon (0 89) 51 60-4111 (Vermittlung)

## 8.8 Serious Adverse Event (SAE) form

| <b>BERICHT ÜBER UNERWÜNSCHTE ARZNEIMITTELWIRKUNGEN</b> (auch Verdachtsfälle)<br><small>Bundesinstitut für Arzneimittel und Medizinprodukte, Friedrich-Ebert-Allee 38, D-53113 Bonn, Tel.: (0228) 207 - 30, FAX: (0228) 207 - 5207</small> |                                                                                    |                                                                        |                                                                     |                                                                                  |                                              |                                                                              |
|-------------------------------------------------------------------------------------------------------------------------------------------------------------------------------------------------------------------------------------------|------------------------------------------------------------------------------------|------------------------------------------------------------------------|---------------------------------------------------------------------|----------------------------------------------------------------------------------|----------------------------------------------|------------------------------------------------------------------------------|
| 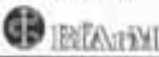                                                                                                                                                       |                                                                                    |                                                                        |                                                                     |                                                                                  |                                              |                                                                              |
| Firmen Code Nr.                                                                                                                                                                                                                           | Pat. Init.<br>N-name <input type="checkbox"/> V-name <input type="checkbox"/>      | Geburtsdatum                                                           | Geschlecht<br>m <input type="checkbox"/> w <input type="checkbox"/> | Größe                                                                            | Gewicht                                      | Schwangerschafts-<br>woche:                                                  |
| Beobachtete unerwünschte Wirkungen                                                                                                                                                                                                        |                                                                                    | aufgetreten am                                                         |                                                                     | Dauer                                                                            |                                              |                                                                              |
| Arzneimittel / Darreichungsform                                                                                                                                                                                                           | Tagesdosis                                                                         | Applikation                                                            | gegeben von / bis                                                   |                                                                                  | wegen (Indikation)                           |                                                                              |
| 1.<br>Chg.-Nr.                                                                                                                                                                                                                            |                                                                                    |                                                                        |                                                                     |                                                                                  |                                              |                                                                              |
| 2.<br>Chg.-Nr.                                                                                                                                                                                                                            |                                                                                    |                                                                        |                                                                     |                                                                                  |                                              |                                                                              |
| 3.<br>Chg.-Nr.                                                                                                                                                                                                                            |                                                                                    |                                                                        |                                                                     |                                                                                  |                                              |                                                                              |
| 4.<br>Chg.-Nr.                                                                                                                                                                                                                            |                                                                                    |                                                                        |                                                                     |                                                                                  |                                              |                                                                              |
| Vermuteter Zusammenhang mit Arznei-<br>mittel Nr. <input type="checkbox"/> <input type="checkbox"/> <input type="checkbox"/> <input type="checkbox"/> <input type="checkbox"/>                                                            | dieses früher gegeben<br>ja <input type="checkbox"/> nein <input type="checkbox"/> | vertragen<br>ja <input type="checkbox"/> nein <input type="checkbox"/> |                                                                     | ggf. Reexposition<br>neg. <input type="checkbox"/> pos. <input type="checkbox"/> |                                              |                                                                              |
| Grunderkrankung:                                                                                                                                                                                                                          |                                                                                    |                                                                        | Begleiterkrankungen:                                                |                                                                                  |                                              |                                                                              |
| Anamn. Besonderheiten:                                                                                                                                                                                                                    |                                                                                    | Nikotin <input type="checkbox"/>                                       | Akohol <input type="checkbox"/>                                     | Kontrazeptiva <input type="checkbox"/>                                           | Schlafmacher <input type="checkbox"/>        |                                                                              |
| Injektate <input type="checkbox"/>                                                                                                                                                                                                        |                                                                                    | Strahlentherapie <input type="checkbox"/>                              | physikal. Therapie <input type="checkbox"/>                         | Diät <input type="checkbox"/>                                                    | Allergien* <input type="checkbox"/>          |                                                                              |
| Stoffwechseldefekte* <input type="checkbox"/>                                                                                                                                                                                             |                                                                                    | Arzneimittelabusus* <input type="checkbox"/>                           |                                                                     | Sonstige: <input type="checkbox"/>                                               |                                              |                                                                              |
| * weitere Erläuterungen                                                                                                                                                                                                                   |                                                                                    |                                                                        |                                                                     |                                                                                  |                                              |                                                                              |
| Veränderung von Laborparametern in Zusammenhang mit der unerwünschten Arzneimittelwirkung: (ggf. Befund beifügen)                                                                                                                         |                                                                                    |                                                                        |                                                                     |                                                                                  |                                              |                                                                              |
| Verlauf und Therapie der unerwünschten Arzneimittelwirkung:                                                                                                                                                                               |                                                                                    |                                                                        |                                                                     |                                                                                  |                                              | lebensbedrohend<br>ja <input type="checkbox"/> nein <input type="checkbox"/> |
| Ausgang der unerwünschten Arzneimittelwirkung:                                                                                                                                                                                            |                                                                                    |                                                                        |                                                                     |                                                                                  |                                              |                                                                              |
| wiedehergestellt <input type="checkbox"/>                                                                                                                                                                                                 | bleibender Schaden <input type="checkbox"/>                                        | noch nicht wiederhergestellt <input type="checkbox"/>                  |                                                                     | unbekannt <input type="checkbox"/>                                               |                                              |                                                                              |
| Exitus <input type="checkbox"/>                                                                                                                                                                                                           | Sektion ja <input type="checkbox"/>                                                | nein <input type="checkbox"/>                                          |                                                                     | (ggf. Befund beifügen)                                                           |                                              |                                                                              |
| Todesursache:                                                                                                                                                                                                                             |                                                                                    |                                                                        |                                                                     |                                                                                  |                                              |                                                                              |
| 4) behandel. Arzt<br>5) Hersteller<br>6) Arznen.-Komm.                                                                                                                                                                                    | Beurteilung des Kausalzusammenhanges:                                              |                                                                        | gesichert <input type="checkbox"/>                                  | wahrscheinlich <input type="checkbox"/>                                          | möglich <input type="checkbox"/>             |                                                                              |
|                                                                                                                                                                                                                                           |                                                                                    |                                                                        | unwahrscheinlich <input type="checkbox"/>                           | unbeurteilt <input type="checkbox"/>                                             | nicht zu beurteilen <input type="checkbox"/> |                                                                              |
| Weitere Bemerkungen:<br>(ggf. Anlage verwenden)                                                                                                                                                                                           |                                                                                    |                                                                        |                                                                     |                                                                                  |                                              |                                                                              |
| Wer wurde informiert: BfArM <input type="checkbox"/> Hersteller <input type="checkbox"/> Arznen.-Komm.-Ärzte <input type="checkbox"/> Sonstige: <input type="checkbox"/>                                                                  |                                                                                    |                                                                        |                                                                     |                                                                                  |                                              |                                                                              |
| Name des Arztes:                                                                                                                                                                                                                          |                                                                                    |                                                                        | Hersteller:                                                         |                                                                                  |                                              | Datum:                                                                       |
| Fachrichtung:                                                                                                                                                                                                                             |                                                                                    |                                                                        |                                                                     |                                                                                  |                                              |                                                                              |
| PLZ:                                                                                                                                                                                                                                      |                                                                                    |                                                                        |                                                                     |                                                                                  |                                              |                                                                              |
| Klinik: ja <input type="checkbox"/> nein <input type="checkbox"/>                                                                                                                                                                         |                                                                                    |                                                                        | (ggf. Stempel)                                                      |                                                                                  |                                              | Unterschrift:                                                                |

BfArM 643 / (10.06)

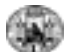



## 8.9 Recommendations for the Prevention, Diagnosis and Treatment of Osteonecrosis of the Jaw (German)

### Empfehlungen des Expertengremiums\* zur Prävention, Diagnose und Behandlung einer Kiefer-Osteonekrose: Juni 2004

#### Hintergrund

Eine Osteonekrose des Kiefers ist eine seltene mögliche Komplikation bei Tumorpatienten, die eine Strahlentherapie, Chemotherapie oder andere Tumortherapien erhalten, oder bei Patienten mit embolischen Ereignissen durch Tumorzellen oder Krankheitserreger. Vor kurzem erschienen Berichte über Kiefer-Osteonekrosen bei Tumorpatienten, die gleichzeitig eine antitumoröse Therapie (Chemotherapie, Steroidtherapie oder Radiatio von Kopf und Hals) und ein intravenöses (i.v.) Bisphosphonat erhalten hatten.<sup>1-3</sup> Im Zusammenhang mit der Entwicklung einer Osteonekrose bei Tumorpatienten (nicht beschränkt auf den Kiefer) gibt es mehrere bekannte Begleitumstände und Risikofaktoren. Zu diesen Faktoren gehören Trauma, weibliches Geschlecht, fortgeschrittenes Alter, zahnlose Bereiche, kombinierte Tumortherapien (z.B. Radiatio von Kopf und Hals, Chemo- oder Steroidtherapie), Dyskrasie, Metastasen, Anämie, Koagulopathie, zahnchirurgische Eingriffe, Alkohol- oder Nikotinkonsum und stattgehabte Infektion. Bei den bisher berichteten Fällen erhielt die Mehrzahl der Patienten eine Langzeit-Chemotherapie und viele erhielten eine kurzzeitige, intermittierende Steroidgabe mit einer gleichzeitigen Bisphosphonat-Therapie zur Tumor- und Symptombehandlung. In der Mehrzahl der Fälle konnten die Patienten in einen schmerzfreien Zustand gebracht werden, bei weiterhin freiliegendem Knochen, durch ein nicht-operatives Verfahren, das aus einer oralen systemischen Antibiotikatherapie und antiseptischen Mundspülungen mit 0,12% Chlorhexidinguconat bestand. Eine operative Intervention war kontraproduktiv und verursachte häufig eine weitere Freilegung von Knochen. Die Bisphosphonat-Behandlung und andere Tumortherapien wurden bei den meisten Patienten fortgesetzt.

Ein Kausalzusammenhang zwischen Bisphosphonat-Therapie und Kiefer-Osteonekrosen ist nicht erwiesen. Zum besseren Verständnis der Pathogenese der Kiefer-Osteonekrose und der Behandlung davon betroffener Patienten traf sich vor kurzem ein Expertengremium\* aus Vertretern von Kieferchirurgen und Ärzten der Mund-, Kiefer- und Zahn- Heilkunde/Onkologie, Endokrinologie und internistischen Onkologie, um die Erfassung von Risikofaktoren für eine Kiefer-Osteonekrose zu erörtern und klinische Leitlinien zur Prävention, Frühdiagnose, Behandlung und multidisziplinären Therapie der Kiefer-Osteonekrose bei Tumorpatienten zu erstellen. Außerdem erarbeitete das Gremium Empfehlungen zur Reduktion der Inzidenz einer Kiefer-Osteonekrose bei Tumorpatienten, die eine Bisphosphonat-Therapie erhalten, sowie für Patienten mit klinisch manifester Osteonekrose des Kiefers, die bereits Bisphosphonate erhalten und bei denen ein kieferchirurgischer Eingriff erforderlich ist. Die Empfehlungen des Gremiums werden hier vorgestellt, um den Ärzten als Orientierung bei der Behandlung der Patienten zu dienen.

#### Klinische Manifestation und Diagnose der Kiefer-Osteonekrose

- Eine Osteonekrose des Kiefers kann über viele Wochen oder Monate asymptomatisch bleiben und wird möglicherweise erst an einem freiliegenden Knochen in der Mundhöhle erkennbar. Diese Läsionen werden jedoch häufig symptomatisch, wenn sich die Stellen sekundär infizieren oder das Weichteilgewebe durch die scharfen Kanten des freiliegenden Knochens verletzt wird.
- Zu den typischen Anzeichen und Symptomen gehören Schmerzen, Weichteilschwellung und Infektion, Zahnlockerung, Sekretabsonderung und freiliegender Knochen; diese Symptome können spontan oder häufiger noch an der Stelle einer vorhergehenden Zahnextraktion auftreten. Manche Patienten stellen sich mit atypischen Beschwerden vor, wie z.B. "Taubheitsgefühl", Gefühl eines "schweren Kiefers" und verschiedenen Dysästhesien.
- Zu den Anzeichen und Symptomen, die vor der Entwicklung einer klinisch manifesten Osteonekrose auftreten können, gehört auch eine plötzliche Veränderung der Gesundheit des periodontalen Gewebes oder der Schleimhaut, Wundheilungsstörungen der Mundschleimhaut, unklarer Schmerz in der Mundhöhle, Zahnlockerung oder Weichteilinfektion.
- Bei Verdacht auf eine Osteonekrose können eine Panorama-Aufnahme und eine Tomographie durchgeführt werden, um andere



Ursachen auszuschließen (z.B. Zysten oder retriierte Zähne). Auch mit Hilfe kleinerer intraoraler Aufnahmen lassen sich geringfügige Knochenveränderungen nachweisen.

- Mikrobiologische Kulturen ermöglichen eine Differenzialdiagnose im Hinblick auf gleichzeitig bestehende Infektionen der Mundhöhle.
- Gewebepunktionen sollten nur durchgeführt werden, wenn der Verdacht auf eine Metastasierung besteht. Wenn eine Biopsie durchgeführt wird, um eine Metastasierung auszuschließen, können mikrobiologische Kulturen (aerob und anaerob) eine Identifizierung von Erregern einer Sekundärinfektion ermöglichen (Hinweis: Aktinomyzeten werden häufig mikroskopisch festgestellt oder in einer Kultur nachgewiesen).

#### **Mögliche Risikofaktoren für die Entwicklung einer Kiefer-Osteonekrose**

- Die genauen Risikofaktoren für eine Kiefer-Osteonekrose wurden bisher nicht identifiziert. Mögliche Risikofaktoren sind u.a.:
  - Begleittherapie mit Steroiden, Chemotherapie und i.v. Bisphosphonaten (in wenigen Fällen nach kurzer Anwendung)
  - Zahnextraktion, Infektionskrankheit und/oder Trauma
  - Gelegentlich treten gleichzeitig bestehende Risikofaktoren nicht offensichtlich zutage.
- Andere Risikofaktoren für eine Osteonekrose (nicht auf den Kiefer beschränkt) wurden bereits zuvor identifiziert, dies sind u.a.:
  - Radio von Kopf und Hals, Chemotherapie, Immuntherapie oder andere Tumortherapien
  - Weibliches Geschlecht, Koagulopathien, Infektionen, periodontale Erkrankung, Knochennekrose, vorhergehende invasive zahnärztliche Eingriffe, Zahnprothesen, Arthritis, Dyskrasien, Gefäßerkrankungen, Alkoholabusus, Rauchen und Mangelernährung. Zu Anästhetika mit Vasokonstriktoren (z.B. Novocain) liegen Berichte über eine mögliche Beteiligung in einigen Fällen einer Osteonekrose vor, dies ist jedoch umstritten.

#### **Mögliche prophylaktische Maßnahmen vor der Initiierung einer Therapie mit i.v. Bisphosphonaten**

- Vermeidung jeglicher elektiver Eingriffe am Kiefer, bei dem eine Knochenheilung erforderlich ist.
- Empfehlenswert ist eine routinemäßige klinische zahnärztliche Untersuchung, die eine Panorama-Röntgenaufnahme des Kiefers zum Nachweis möglicher dentaler und periodontaler Infektionen beinhalten kann.
- Wenn die Bisphosphonat-Therapie kurzzeitig aufgeschoben werden kann, ohne dadurch ein Risiko für Skelettkomplikationen zu verursachen, sollten Zähne mit schlechter Prognose bzw. extraktionsbedürftige Zähne extrahiert werden, und andere zahnchirurgische Eingriffe sollten vor Initiierung der Bisphosphonat-Therapie abgeschlossen werden. Der Nutzen oder das Risiko eines Vorenthaltens der Bisphosphonat-Therapie wurde bisher nicht untersucht. Die Entscheidung, auf die Bisphosphonat-Therapie zu verzichten, muss daher vom behandelnden Onkologen in Rücksprache mit einem Kiefer/Gesichtschirurgen oder einem anderen Spezialisten für Zahnheilkunde erfolgen.
  - Als prophylaktische zahnärztliche Maßnahmen vor Einleitung einer Chemotherapie, Immuntherapie, und/oder Bisphosphonat-Therapie wird Folgendes empfohlen:
    - Veretterte und nicht sanierbare Zähne und beteiligte periodontale Gewebe entfernen
    - Funktionelle Wiederherstellung eines sanierbaren Gebisses, einschließlich einer endodontischen Behandlung
    - Zahnprophylaxe, Karieskontrolle und Stabilisierung einer wiederherstellenden Zahnbehandlung
    - Untersuchung von Zahnprothesen, um einen korrekten Sitz sicherzustellen (Zahnprothesen nachts entfernen)
    - Aufklärung der Patienten über Mundhygiene
    - Eine prophylaktische Antibiotikatherapie vor routinemäßigen, zahnärztlichen Behandlungen ist nicht angezeigt, sofern sie nicht anderweitig zur Prophylaxe einer Bakteriämie bei gefährdeten Patienten notwendig ist (z.B. Patienten mit einem Verweilkatheter).
- Aufklärung der Patienten hinsichtlich der Bedeutung einer guten Zahnhygiene und der Mitteilung von Symptomen
  - Empfehlung von regelmäßig vereinbarten Inspektionen der Mundhöhle (Knochen und Weichteile) nach Möglichkeit alle 3 bis 4 Monate, je nach Risiko
- Onkologen sollten zu Therapiebeginn und bei jeder Nachuntersuchung eine kurze Inspektion der Mundhöhle durchführen.

#### **Zahnärztliche Behandlung bei Patienten, die bereits eine Bisphosphonat-Therapie erhalten**

- Beibehaltung einer ausgezeichneten Mundhygiene, um das Risiko für dentale und periodontale Infektionen zu reduzieren.
- Kontrolle und Anpassung herausnehmbarer Zahnprothesen im Hinblick auf eine mögliche Weichteilverletzung, insbesondere des Gewebes, das den Knochen bedeckt.
- Durchführung einer routinemäßigen Zahnreinigung, wobei sicherzustellen ist, dass eine Weichteilverletzung vermieden wird.
- Aggressive nicht-operative Behandlung von Zahninfektionen, nach Möglichkeit mit einer Wurzelkanalbehandlung oder mit minimaler operativer Intervention.



- Eine endodontische (Wurzelkanal) Behandlung ist Extraktionen nach Möglichkeit vorzuziehen. Möglicherweise muss eine Amputation der Zahnkrone mit nachfolgender Wurzelkanalbehandlung der zurückbleibenden Zahnwurzeln durchgeführt werden, um die Notwendigkeit einer Zahnextraktion und damit die mögliche Entwicklung einer Osteonekrose zu vermeiden.

#### Behandlung von Patienten mit Kiefer-Osteonekrose

- Rücksprache mit einem Kieferchirurgen oder einem auf Zahn-, Mund- und Kiefererkrankungen spezialisierten Onkologen.
- Ein nicht-operatives Vorgehen kann möglicherweise eine weitere Knochenschädigung verhindern.
  - Minimales Débridement des Knochens, nur zur Reduktion scharfer Kanten, um Verletzungen der umgebenden oder gegenüberliegenden Gewebe zu reduzieren (z.B. der seitlichen Zunge, wenn der linguale Unterkieferknochen freiliegt).
  - Zur Abdeckung und zum Schutz des freiliegenden Knochens kann eine herausnehmbare Vorrichtung verwendet werden.
  - Eine Schutzabdeckung kann von Nutzen für Patienten mit freiliegendem Knochen sein, der die benachbarten Gewebe verletzt, sowie bei Patienten, bei denen die Osteonekrose-Stelle bei normaler Mundbetätigung wiederholt traumatisiert wird. Ein dünner vakuumgeformter Vinyl-Mundschutz oder ein dünner Acrylschutz kann verwendet werden, vorausgesetzt, die Vorrichtung führt zu keiner weiteren Traumatisierung der Osteonekrose-Stelle und sie kann von Bakterienplaques und Gewebestrümmern freigehalten werden.
  - Eine Biopsie sollte nur durchgeführt werden, wenn der Verdacht auf Metastasen im Kiefer besteht. Ein Teil der Biopsie sollte zur mikrobiologischen Analyse sowie zur Anlage von Kulturen aus der Biopsie-Stelle weitergeleitet werden.
- Eine intermittierende oder kontinuierliche Antibiotikatherapie kann von Vorteil sein (um die geeignete Antibiotikatherapie festzulegen, sollten Kulturen angelegt werden). Das Ziel der Antibiotikatherapie besteht darin, eine sekundäre Weichteilinfektion und damit Schmerzen zu verhindern sowie einer Osteomyelitis vorzubeugen. Derzeit ist nicht fest, wie lange die Antibiotikatherapie durchgeführt werden sollte, und ob Mundspülungen mit einem Antiseptikum von Nutzen sind; unter dieser Behandlungsstrategie wurde jedoch eine Kontrolle der Schmerzen und der Erkrankung beobachtet. Die Entscheidung zur Behandlung mit einem Antibiotikum erfolgt auf der Grundlage der klinischen Beurteilung, die von einem Kiefer/Gesichtschirurgen oder einem anderen Spezialisten für Zahn-, Mund- und Kiefererkrankungen in Rücksprache mit dem behandelnden Arzt/Onkologen erfolgen sollte. Kulturen, einschließlich derjenigen zum Nachweis von aeroben, anaeroben Bakterienspezies, Viren und Pilzspezies, können gewonnen werden, um über die geeignete antimikrobielle Intervention zu entscheiden. Antibiotika, die sich bei Osteonekrose als nützlich erwiesen haben, sind u.a.:

- Penicillin VK 500 mg oder Amoxicillin 500 mg; jeweils anfangs 4 x täglich und 2 x täglich zur Erhaltungstherapie
- Bei Penicillinallergie:
  - Clindamycin 150 bis 300 mg 4 x täglich
  - Vibramycin 100 mg 1 x täglich
  - Erythromycinethylsuccinat 400 mg 3 x täglich
- Antimykotika falls erforderlich:
  - Nystatin orale Suspension 5 bis 15 ml 4 x täglich oder 100.000 IE/ml
  - Mycoslex Troches (Clotrimazol 10 mg) x 5/Tag
  - Fluconazol 200 mg initial, dann 100 mg 1 x täglich
  - Weitere mögliche systemische Antimykotika wie z.B. Itraconazol oder Ketoconazol
- Virustatika falls erforderlich:
  - Aciclovir 400 mg 2 x täglich
  - Valaciclovir-Hydrochlorid 500 mg bis 2 g 2 x täglich
- Ferner können Mundspülungen mit 0,12% Chlorhexidinguconat (Peridex®) oder Minocyclinhydrochlorid-(Arestin®)-Periodontal-Beutel angewendet werden.

- Zahnprothesen können getragen werden, sie sollten jedoch angepasst werden, um Weichteilverletzungen oder -reizungen auf ein Minimum zu reduzieren, vor allem angesichts einer laufenden Antibiotikatherapie, und sie sollten nachts entfernt werden.
- Bei allen Patienten sollte eine Kontrolle in dreimonatigen Intervallen oder häufiger erfolgen, wenn die Symptome andauern oder sich verschlechtern werden.
- Ein Absetzen oder eine Unterbrechung der Bisphosphonat-Therapie kann in schweren Fällen erwogen werden. Es empfiehlt sich jedoch eine enge Koordination zwischen einem Spezialisten für Zahn-, Mund- und Kieferheilkunde und einem internistischen Onkologen, wobei



das Risiko für Skelettkomplikationen (einschließlich einer tumorinduzierten Hyperkalzämie) gegenüber dem Risiko einer Osteonekrose abgewogen werden muss. Bisher scheint es, dass das Absetzen der Bisphosphonat-Therapie keinen Effekt auf eine manifeste Osteonekrose hat. Hierzu bedarf es jedoch weiterer Untersuchungen.

- Wenn bei Patienten mit manifester Osteonekrose eine Operation erforderlich wird, kann ein Absetzen oder eine Unterbrechung der Bisphosphonat-Therapie erwogen werden, wobei das mögliche Risiko einer weiteren Osteonekrose gegenüber dem Risiko für Skelettkomplikationen oder für eine tumorinduzierte Hyperkalzämie zu berücksichtigen ist. Es ist nicht bekannt, ob das Absetzen der Bisphosphonat-Therapie einen Nutzen bringt oder nicht. Das Absetzen der Bisphosphonat-Therapie kann jedoch bei manchen Patienten sinnvoll sein, wenn das Risiko einer Osteonekrose das Risiko für Skelettkomplikationen oder für eine tumorinduzierte Hyperkalzämie überwiegt. Die Entscheidung, die Bisphosphonat-Therapie zu beenden, muss daher zwischen dem behandelnden Onkologen und einem Kieferchirurgen koordiniert werden. Eine Antibiotikatherapie nach dem kieferchirurgischen Eingriff kann in dieser Patientenpopulation angemessen sein und sollte postoperativ über mindestens 10 Tage fortgesetzt werden. Dies ist jedoch eine klinische Entscheidung, die in Zusammenarbeit mit dem behandelnden Onkologen getroffen werden muss. Diese Entscheidung kann sich an Kulturen orientieren, die zum Zeitpunkt des kieferchirurgischen Eingriffs aus der Extraktionsstelle angelegt werden.
- Hyperbarer Sauerstoff hat sich nicht als wirksam erwiesen und wird daher nicht empfohlen.
- Knochenintegrierte Zahnimplantate sind kontraindiziert und können zu einer weiteren Osteonekrose führen.

### Literatur

1. Marx RE. Pamidronate (Aredia) and zoledronate (Zometa) induced avascular necrosis of the jaws: a growing epidemic. *J Oral Maxillofac Surg.* 2003;61:1115-1117.
2. Migliorati CA. Bisphosphonates and oral cavity avascular bone necrosis. *J Clin Oncol.* 2003;21:4253-4254.
3. Ruggiero SL, Mehrotra B, Rosenberg TJ, Engroff SL. Osteonecrosis of the jaws associated with the use of bisphosphonates: a review of 63 cases. *J Oral Maxillofac Surg.* 2004;62:527-534.

\* Zusammensetzung des Expertengremiums: **Kathryn Damato, RDH, MS, CCRP**, University of Connecticut Health Center, Farmington, Conn; **Julie Gralow, MD**, University of Washington Medical Center, Seattle, Wash; **Ana Hoff, MD**, University of Texas MD Anderson Cancer Center, Houston, Tex; **Joseph Huryn, DDS**, Memorial Sloan-Kettering Cancer Center, New York, NY; **Robert Marx, DDS**, University of Miami School of Medicine, Miami, Fla; **Salvatore Ruggiero, DMD, MD**, Long Island Jewish Medical Center, New Hyde Park, NY; **Mark Schubert, DDS, MDS**, Seattle Cancer Care Alliance, Seattle, Wash; **Bela Toth, DDS, MS**, University of Texas MD Anderson Cancer Center, Houston, Tex; **Vicente Valero, MD, FACP**, The University of Texas MD Anderson Cancer Center, Houston, Tex.



## 8.10 Signatures

### 8.10.1 *Signature of the Clinical Investigator*

I confirm that I have read this protocol, I understand it, and I will work according to this protocol and to the ethical principles stated in the latest version of the Declaration of Helsinki, the applicable guidelines for good clinical practices, or the applicable laws and regulations of the country of the study site for which I am responsible, whichever provides the greater protection of the individual. I will accept the monitor's overseeing of the study. I will promptly submit the protocol to applicable ethical review boards. I will provide promptly all the necessary documentation as warranted in this protocol. I will promptly submit the protocol to applicable ethical review boards and the responsible department of government and administration.

\_\_\_\_\_  
Signature of Principal Investigator

\_\_\_\_\_  
Date

\_\_\_\_\_  
Signature of Investigator

\_\_\_\_\_  
Date

\_\_\_\_\_  
Investigator Name

\_\_\_\_\_  
Name of Facility

\_\_\_\_\_  
Address of Facility

### 8.10.2 *Signatures of the Sponsor and the Biometrist*



# 8.11 Product informations (German)

## 8.11.1 Docetaxel

| ZUSAMMENFASSUNG DER MERKMALE DES ARZNEIMITTELS                                                                                                                                                                                                                                                                                                                                                                                                                                                                                                                                                                                                                                                                                                                                                                                                                                                                                                                                                                                                                                                                                                                                                                                                                                                                                                                                                                                                                                                                                                                                                                                                                                                                                                                                                                                                                                                                                                                                                                                                                                                              |                                                                                                                                                                                                                                                                                                                                                                                                                                                                                                                                                                                                                                                                                                                                                                                                                                                                                                                                                                                                                                                                                                                                                                                                                                                                                                                                                                                                                                                                                                                                                                                                                                                                                                                                                                                                                                                                                                                                                                                                                                                                                                                                                                                                                                                                                                                                                                                                                                                                                                                                                                                                                                                                                                                                                                                                                                                                                                                                                                                                                                                                                                                                            |
|-------------------------------------------------------------------------------------------------------------------------------------------------------------------------------------------------------------------------------------------------------------------------------------------------------------------------------------------------------------------------------------------------------------------------------------------------------------------------------------------------------------------------------------------------------------------------------------------------------------------------------------------------------------------------------------------------------------------------------------------------------------------------------------------------------------------------------------------------------------------------------------------------------------------------------------------------------------------------------------------------------------------------------------------------------------------------------------------------------------------------------------------------------------------------------------------------------------------------------------------------------------------------------------------------------------------------------------------------------------------------------------------------------------------------------------------------------------------------------------------------------------------------------------------------------------------------------------------------------------------------------------------------------------------------------------------------------------------------------------------------------------------------------------------------------------------------------------------------------------------------------------------------------------------------------------------------------------------------------------------------------------------------------------------------------------------------------------------------------------|--------------------------------------------------------------------------------------------------------------------------------------------------------------------------------------------------------------------------------------------------------------------------------------------------------------------------------------------------------------------------------------------------------------------------------------------------------------------------------------------------------------------------------------------------------------------------------------------------------------------------------------------------------------------------------------------------------------------------------------------------------------------------------------------------------------------------------------------------------------------------------------------------------------------------------------------------------------------------------------------------------------------------------------------------------------------------------------------------------------------------------------------------------------------------------------------------------------------------------------------------------------------------------------------------------------------------------------------------------------------------------------------------------------------------------------------------------------------------------------------------------------------------------------------------------------------------------------------------------------------------------------------------------------------------------------------------------------------------------------------------------------------------------------------------------------------------------------------------------------------------------------------------------------------------------------------------------------------------------------------------------------------------------------------------------------------------------------------------------------------------------------------------------------------------------------------------------------------------------------------------------------------------------------------------------------------------------------------------------------------------------------------------------------------------------------------------------------------------------------------------------------------------------------------------------------------------------------------------------------------------------------------------------------------------------------------------------------------------------------------------------------------------------------------------------------------------------------------------------------------------------------------------------------------------------------------------------------------------------------------------------------------------------------------------------------------------------------------------------------------------------------------|
| <p><b>1. BEZEICHNUNG DES ARZNEIMITTELS</b><br/>TAXOTERE 80 mg Konzentrat und Lösungsmittel zur Herstellung einer Infusionslösung</p>                                                                                                                                                                                                                                                                                                                                                                                                                                                                                                                                                                                                                                                                                                                                                                                                                                                                                                                                                                                                                                                                                                                                                                                                                                                                                                                                                                                                                                                                                                                                                                                                                                                                                                                                                                                                                                                                                                                                                                        |                                                                                                                                                                                                                                                                                                                                                                                                                                                                                                                                                                                                                                                                                                                                                                                                                                                                                                                                                                                                                                                                                                                                                                                                                                                                                                                                                                                                                                                                                                                                                                                                                                                                                                                                                                                                                                                                                                                                                                                                                                                                                                                                                                                                                                                                                                                                                                                                                                                                                                                                                                                                                                                                                                                                                                                                                                                                                                                                                                                                                                                                                                                                            |
| <p><b>2. QUALITATIVE UND QUANTITATIVE ZUSAMMENSETZUNG</b><br/>Durchsichtflaschen zur Einmalentnahme des TAXOTERE-80-mg-Konzentrates zur Herstellung einer Infusionslösung enthalten Docetaxel als Trihydrat entsprechend 80 mg Docetaxel (wasserfrei). Die viskose Lösung enthält 40 mg/ml Docetaxel (wasserfrei).<br/>Hilfsstoffe siehe unter 6.1.</p>                                                                                                                                                                                                                                                                                                                                                                                                                                                                                                                                                                                                                                                                                                                                                                                                                                                                                                                                                                                                                                                                                                                                                                                                                                                                                                                                                                                                                                                                                                                                                                                                                                                                                                                                                     |                                                                                                                                                                                                                                                                                                                                                                                                                                                                                                                                                                                                                                                                                                                                                                                                                                                                                                                                                                                                                                                                                                                                                                                                                                                                                                                                                                                                                                                                                                                                                                                                                                                                                                                                                                                                                                                                                                                                                                                                                                                                                                                                                                                                                                                                                                                                                                                                                                                                                                                                                                                                                                                                                                                                                                                                                                                                                                                                                                                                                                                                                                                                            |
| <p><b>3. DARREICHUNGSFORM</b><br/>Konzentrat und Lösungsmittel zur Herstellung einer Infusionslösung.</p>                                                                                                                                                                                                                                                                                                                                                                                                                                                                                                                                                                                                                                                                                                                                                                                                                                                                                                                                                                                                                                                                                                                                                                                                                                                                                                                                                                                                                                                                                                                                                                                                                                                                                                                                                                                                                                                                                                                                                                                                   |                                                                                                                                                                                                                                                                                                                                                                                                                                                                                                                                                                                                                                                                                                                                                                                                                                                                                                                                                                                                                                                                                                                                                                                                                                                                                                                                                                                                                                                                                                                                                                                                                                                                                                                                                                                                                                                                                                                                                                                                                                                                                                                                                                                                                                                                                                                                                                                                                                                                                                                                                                                                                                                                                                                                                                                                                                                                                                                                                                                                                                                                                                                                            |
| <p><b>4. KLINISCHE ANGABEN</b><br/><b>4.1 Anwendungsgebiete</b><br/><b>Brustkrebs</b><br/>Taxotere ist in Kombination mit Doxorubicin und Cyclophosphamid für die adjuvante Therapie von Patientinnen mit operablem, nodal positivem Brustkrebs angezeigt.<br/>TAXOTERE (Docetaxel) ist in Kombination mit Doxorubicin zur Behandlung von Patientinnen mit lokal fortgeschrittenem oder metastasiertem Brustkrebs ohne vorausgegangene Chemotherapie angezeigt.<br/>Die TAXOTERE (Docetaxel) Monotherapie ist zur Behandlung von Patientinnen mit lokal fortgeschrittenem oder metastasiertem Brustkrebs nach Versagen einer Chemotherapie angezeigt. Die vorausgegangene Chemotherapie sollte ein Anthracyclin oder Alkylantennen enthalten haben.<br/>TAXOTERE (Docetaxel) ist in Kombination mit Trastuzumab angezeigt zur Behandlung von Patientinnen mit metastasiertem Mammakarzinom, deren Tumore HER2 überexprimieren und die vorher noch keine Chemotherapie gegen ihre metastasierte Erkrankung erhalten haben.<br/>TAXOTERE (Docetaxel) ist in Kombination mit Capecitabin zur Behandlung von Patientinnen mit lokal fortgeschrittenem oder metastasiertem Brustkrebs nach Versagen einer Chemotherapie angezeigt. Die frühere Behandlung sollte ein Anthracyclin enthalten haben.<br/><b>Nicht-kleinzelliges Bronchialkarzinom</b><br/>TAXOTERE (Docetaxel) ist zur Behandlung von Patienten mit lokal fortgeschrittenem oder metastasiertem, nicht-kleinzelligem Bronchialkarzinom nach Versagen einer vorausgegangenen Chemotherapie angezeigt.<br/>TAXOTERE (Docetaxel) ist in Kombination mit Cisplatin zur Behandlung von Patienten mit nicht-mesotheliales, lokal fortgeschrittenem oder metastasiertem nicht-kleinzelligem Bronchialkarzinom ohne vorausgegangene Chemotherapie angezeigt.<br/><b>Prostatakarzinom</b><br/>TAXOTERE (Docetaxel) ist in Kombination mit Prednison oder Prednisolon zur Behandlung von Patienten mit hormonrefraktärem metastasiertem Prostatakarzinom angezeigt.<br/>Die Anwendung von Docetaxel sollte auf Einrichtungen beschränkt bleiben, die auf</p> | <p>die Gabe von zytostatischer Chemotherapie spezialisiert sind und sollte nur unter Aufsicht eines qualifizierten Onkologen erfolgen.<br/><b>4.2 Dosierung, Art und Dauer der Anwendung</b><br/><b>Empfohlene Dosierung:</b><br/>Soweit nicht kontraindiziert, kann zur Behandlung von Brustkrebs und nicht-kleinzelligem Bronchialkarzinom eine Begleitmedikation bestehend aus einem oralen Kortikosteroid wie z. B. Dexamethason 16 mg pro Tag (z. B. 8 mg 2 x täglich) über 3 Tage, beginnend einen Tag vor der Gabe von Docetaxel, verabreicht werden (siehe auch Abschnitt 4.4).<br/>G-CSF kann prophylaktisch gegeben werden, um die hämatologische Toxizität herabzusetzen.<br/>Zur Therapie des Prostatakarzinoms ist bei gleichzeitiger Gabe von Prednison oder Prednisolon das empfohlene Regime für die Palliativmedikation mit Dexamethason 8 mg oral, jeweils 12 Stunden, 3 Stunden und 1 Stunde vor der Infusion von Docetaxel (siehe auch Abschnitt 4.4).<br/>Docetaxel wird als einständige Infusion alle 3 Wochen gegeben.<br/><b>Brustkrebs</b><br/>Bei der adjuvanten Therapie von operablem nodal positivem Brustkrebs beträgt die empfohlene Dosierung von Docetaxel 75 mg/m<sup>2</sup> als 1-stündige Infusion nach der Gabe von Doxorubicin 50 mg/m<sup>2</sup> und Cyclophosphamid 600 mg/m<sup>2</sup> alle 3 Wochen über 6 Zyklen (siehe hierzu auch Dosisanpassungen unter der Behandlung).<br/>Zur Behandlung von lokal fortgeschrittenem oder metastasiertem Brustkrebs beträgt die empfohlene Dosis für die Docetaxel-Monotherapie 100 mg/m<sup>2</sup>. Zur Therapie nicht vorherbehandelter Patientinnen werden 75 mg/m<sup>2</sup> Docetaxel in Kombination mit Doxorubicin (50 mg/m<sup>2</sup>) gegeben (siehe auch Abschnitt 6.6).<br/>In der Kombination mit Trastuzumab beträgt die empfohlene Dosierung von Docetaxel 100 mg/m<sup>2</sup> alle drei Wochen, wobei Trastuzumab wöchentlich gegeben wird. In der Zulassungstudie wurde mit der Infusion von Docetaxel am Tag nach der ersten Gabe von Trastuzumab begonnen. Die folgenden Gaben von Docetaxel wurden unmittelbar nach Abschluss der Infusion von Trastuzumab gegeben, sofern die vorausgehende Dosis von Trastuzumab gut vertragen wurde. Bezüglich der Dosierung von Trastuzumab siehe Zusammenfassung der Produktmerkmale/Fachinformation von Trastuzumab.<br/>In der Kombination mit Capecitabin beträgt die empfohlene Dosis für Docetaxel 75 mg/m<sup>2</sup> alle drei Wochen, kombiniert mit zweimal täglich 1250 mg/m<sup>2</sup> Capecitabin (innerhalb 30 Minuten nach einer Mahlzeit) über 2 Wochen, gefolgt von einer 1-wöchigen Therapiepause. Zur Capecitabin-Dosisberechnung nach Körperoberfläche siehe die Zusammenfassung der Produktmerkmale von Capecitabin.<br/><b>Nicht-kleinzelliges Bronchialkarzinom</b><br/>Bei chemotherapeutisch nicht vorherbehandelten Patienten mit nicht-kleinzelligem Bronchialkarzinom wird Docetaxel alle drei Wo-</p>                                                                                                                                                         |
|                                                                                                                                                                                                                                                                                                                                                                                                                                                                                                                                                                                                                                                                                                                                                                                                                                                                                                                                                                                                                                                                                                                                                                                                                                                                                                                                                                                                                                                                                                                                                                                                                                                                                                                                                                                                                                                                                                                                                                                                                                                                                                             | <p>chen als einständige iv-Infusion verabreicht. Die empfohlene Dosierung beträgt 75 mg/m<sup>2</sup> Docetaxel gefolgt von 75 mg/m<sup>2</sup> Cisplatin über 30–60 Minuten. Für die Behandlung nach Versagen einer vorausgegangenen, platinhaltigen Chemotherapie wird die Gabe von 75 mg/m<sup>2</sup> als Monotherapie empfohlen.<br/><b>Prostatakarzinom</b><br/>Die empfohlene Dosierung von Docetaxel beträgt 75 mg/m<sup>2</sup>. Es werden zweimal täglich 5 mg Prednison oder Prednisolon oral kontinuierlich gegeben (siehe auch Abschnitt 5.1).<br/><b>Dosisanpassung unter der Behandlung:</b><br/>Allgemeines<br/>Docetaxel sollte erst angewendet werden, wenn die Neutrophilenzahl mindestens 1500 Zellen/mm<sup>3</sup> beträgt.<br/>Bei Patienten, die während einer Docetaxel-Therapie entweder an einer Neutropenie mit Fieber litten, Neutrophilenzahlen von &lt;500 Zellen/mm<sup>3</sup> länger als eine Woche aufwiesen, an schweren oder kumulativen Hautveränderungen oder an einer schweren peripheren Neuropathie litten, sollte die Dosierung von Docetaxel von 100 mg/m<sup>2</sup> auf 75 mg/m<sup>2</sup> und/oder von 75 mg/m<sup>2</sup> auf 60 mg/m<sup>2</sup> verringert werden. Zeigt der Patient bei 60 mg/m<sup>2</sup> weiterhin die beschriebenen Symptome, muss die Behandlung abgebrochen werden.<br/>Adjuvante Therapie von Brustkrebs<br/>Patientinnen, die in der Zulassungstudie eine adjuvante Therapie für Brustkrebs erhielten und bei denen eine komplizierte Neutropenie auftrat (einschließlich veringerte Neutropenie, leichte Neutropenie oder Infektion) wurde empfohlen, G-CSF (z. B. von Tag 4–11) als Prophylaxe für alle kommenden Zyklen einzusetzen. Patientinnen, die trotzdem an komplizierten Neutropenien litten, sollten weiterhin G-CSF bekommen bei gleichzeitiger Reduktion der Docetaxel-Dosis auf 60 mg/m<sup>2</sup>. In der klinischen Praxis könnte Neutropenie allerdings bereits im ersten Zyklus auftreten. Daher sollte sich der Einsatz von G-CSF nach dem neutropenischen Risiko der Patientinnen und aktuellen Empfehlungen richten.<br/>Bei Patientinnen, bei denen eine Stomatitis Grad 3 oder 4 auftritt, sollte die Dosis auf 60 mg/m<sup>2</sup> reduziert werden.<br/>In Kombination mit Cisplatin:<br/>Bei Patienten, die zunächst 75 mg/m<sup>2</sup> Docetaxel in Kombination mit Cisplatin erhielten, und deren letzte Thrombozytenzahl im vorherigen Behandlungszyklus bei &lt;25.000 Zellen/mm<sup>3</sup> lag, bei Patienten, die an einer Neutropenie mit Fieber litten, sowie bei Patientinnen mit ersten, nicht-hämatologischen Toxizitätserscheinungen sollte die Docetaxel-Dosierung in dem nachfolgenden Zyklus auf 65 mg/m<sup>2</sup> verringert werden. Für die Cisplatin-Dosierung siehe die Zusammenfassung der Produktmerkmale des Herstellers.<br/>In Kombination mit Capecitabin:<br/>• Zur Dosisanpassung von Capecitabin siehe die Zusammenfassung der Produktmerkmale von Capecitabin.<br/>• Bei Patientinnen, bei denen erstmals ein Grad-2-Toxizität auftritt, die zum Zeitpunkt der nächsten TAXOTERE/Capecitabin-</p> |

Januar 2005

1075-0009 - TAXOTERE 80 mg - 0

1



SUCCESS-Trial, Version 1.2, 15.8.2005

Page 165

Anschrift: D-80337 München • Maistraße 11 • Telefon (0 89) 51 60-4111 (Vermittlung)

**TAXOTERE 80 mg**

Gruppe  
**sanofi aventis**

Behandlung persistiert, wird die Behandlung hinausgezögert, bis eine Rückbildung auf Grad 0–1 erreicht worden ist und dann mit 100 % der ursprünglichen Dosis fortgesetzt.

- Bei Patientinnen, die zu irgendeinem Zeitpunkt des Behandlungszyklus zum zweiten Mal eine Grad-2-Nebenwirkung oder zum ersten Mal eine Grad-3-Nebenwirkung entwickeln, sollte die Behandlung hinausgezögert werden, bis eine Rückbildung auf Grad 0–1 erreicht worden ist und dann mit 66 mg/m<sup>2</sup> TAXOTERE fortgesetzt werden.
- Beim Auftreten irgendwelcher weiterer Nebenwirkungen oder irgendeiner Grad-4-Toxizität setzen Sie die TAXOTERE-Behandlung ab.

Bezüglich der Dosisanpassung von Taxotumab, siehe Zusammenfassung der Produktmerkmale/Fachinformationen von Taxotumab.

**Besondere Patientengruppen:**

**Patienten mit verminderter Leberfunktion:** Aufgrund von pharmakokinetischen Daten mit Docetaxel als Monotherapie in einer Dosierung von 100 mg/m<sup>2</sup> beträgt die empfohlene Dosis bei Patienten, deren Transaminasen (ALT und/oder AST) auf mehr als das 1,5fache der oberen Normalwerte und alkalische Phosphatase auf mehr als das 2,5fache der oberen Normalwerte erhöht sind, 75 mg/m<sup>2</sup> Docetaxel (siehe auch Abschnitt 4.4 und 5.2). Bei Patienten, deren Serumalbumin größer als der obere Normalwert ist und/oder deren Transaminasewerte (ALT und AST) >3,5fach der oberen Normalwerte und deren alkalische Phosphatase das 6fache der oberen Normalwerte betragen, kann keine Dosisreduktion empfohlen werden; Docetaxel sollte nicht angewandt werden, es sei denn bei strenger Indikationsstellung. Es liegen keine Daten über eine Kombinationsbehandlung mit Docetaxel bei Patienten mit verminderter Leberfunktion vor.

**Kinder:** Die Sicherheit und Wirksamkeit von Docetaxel bei Kindern ist nicht erwiesen.

**Ältere Patienten:** Anhand der in einem großen Kollektiv bestimmten pharmakokinetischen Daten ergeben sich keine speziellen Anweisungen für die Behandlung von älteren Patienten.

In Kombination mit Capecitabin wird für Patienten im Alter von 60 Jahren oder darüber eine Reduzierung der Anfangsdosis von Capecitabin auf 75 % empfohlen (siehe die Zusammenfassung der Produktmerkmale von Capecitabin).

**4.3 Gegenanzeigen**

Überempfindlichkeit gegenüber dem arzneilich wirksamen Bestandteil oder einem der Hilfsstoffe.

Docetaxel soll nicht angewandt werden bei Patienten mit einer Neutrophilenzahl <1500 Zellen/mm<sup>3</sup>.

Docetaxel darf bei schwangeren oder stillenden Frauen nicht angewandt werden.

Docetaxel sollte bei Patienten mit schwerer Leberfunktionsstörung nicht angewandt werden, da keine entsprechenden Untersuchungsgebnisse vorliegen (siehe auch Abschnitt 4.4 und 4.2).

Die für andere Arzneimittel geltenden Gegenanzeigen gelten gleichermaßen für die Kombinationen dieser Arzneimittel mit Docetaxel.

**4.4 Warnhinweise und Vorsichtsmaßnahmen für die Anwendung**

Soweit nicht kontraindiziert, kann bei Brustkrebs und nicht-kleinzelligem Bronchialkarzinom durch eine Palmedikation mit einem oralen Kortikosteroid sowohl Häufigkeit und Schweregrad von Flüssigkeitsretentionen als auch der Schweregrad von Überempfindlichkeitsreaktionen reduziert werden. Hierzu kann z. B. Dexamethason über 3 Tage beginnend einen Tag vor der Gabe von Docetaxel in einer Dosierung von 16 mg pro Tag (z. B. 8 mg zweimal täglich) verabreicht werden. Bei der Therapie des Prostatakarzinoms besteht die Palmedikation aus Dexamethason oral 8 mg, jeweils 12 Stunden, 3 Stunden und 1 Stunde vor der Infusion von Docetaxel (siehe auch Abschnitt 4.2).

**Blut**

Neutropenie ist die häufigste Nebenwirkung von Docetaxel. Der Nadir der Neutrophilen wird im Median nach 7 Tagen erreicht. Dieser Zeitraum kann jedoch bei ausgiebig vorbehandelten Patienten verkürzt sein. Häufige Kontrollen des großen Blutbildes sollten bei allen Patienten, die Docetaxel erhalten, erfolgen. Patienten sollen erst dann einen erneuten Docetaxelzyklus erhalten, wenn sich die Neutrophilenzahl auf mindestens 1600 Zellen/mm<sup>3</sup> oder mehr erholt hat (siehe auch Abschnitt 4.2).

Beim Auftreten einer schweren Neutrozytopenie (<600 Zellen/mm<sup>3</sup> über 7 Tage oder länger) während eines Docetaxel-Behandlungszyklus wird für die anschließenden Therapiezyklen eine Dosisreduktion oder die Anwendung geeigneter symptomatischer Maßnahmen empfohlen (siehe auch Abschnitt 4.2).

**Überempfindlichkeitsreaktionen**

Die Patienten sollten vor allem während der ersten und zweiten Infusion mit Docetaxel wegen möglicher Überempfindlichkeitsreaktionen streng überwacht werden. Wenige Minuten nach Beginn der Docetaxel-Infusion können Überempfindlichkeitsreaktionen eintreten, so dass die Möglichkeit zur Behandlung von Blutdruckabfall und Bronchospasmen gegeben sein muss. Schwache Symptome wie Rötungen oder vereinzelte Hautreaktionen erfordern keine Unterbrechung der Behandlung. Treten jedoch schwere Reaktionen, wie starker Blutdruckabfall, Bronchospasmen oder generalisierte Hautausschläge/Erytheme auf, so ist die Behandlung mit Docetaxel sofort abzubrechen und eine geeignete Therapie einzuleiten. Patienten, die unter der Behandlung mit Docetaxel schwere Überempfindlichkeitsreaktionen zeigen, sollten nicht erneut mit Docetaxel behandelt werden.

**Hautreaktionen**

Lokalisierte Erytheme an den Extremitäten (Handflächen oder Fußsohlen) verbunden mit Ödembildung und getriggert von Abschuppungen wurden beobachtet. Über schwerwiegende Symptome wie Exantheme gefolgt von Abschuppungen, die zur Unterbrechung oder dem Absetzen der Behandlung

mit Docetaxel führen, wurde berichtet (siehe auch Abschnitt 4.2).

**Flüssigkeitsretention**

Patienten mit schweren Flüssigkeitseinlagerungen wie Pleurerguss, Perikarderguss oder Ascites sollten streng überwacht werden.

**Patienten mit verminderter Leberfunktion**

Unter der Behandlung mit Docetaxel als Monotherapie in einer Dosierung von 100 mg/m<sup>2</sup> besteht bei Patienten, deren Transaminasen (ALT und/oder AST) auf mehr als das 1,5fache der oberen Normalwerte und alkalische Phosphatase auf mehr als das 2,5fache des oberen Normalwertes erhöht sind, ein erhöhtes Risiko, schwere Nebenwirkungen, wie Tod durch Toxizität einschließlich Sepsis und gastrointestinale Blutungen mit möglichem letalem Ausgang, Neutropenie mit Reber, Infektionen, Thrombozytopenie, Stomatitis und Asthenie zu entwickeln. Daher wird für Patienten mit erhöhten Leberfunktionswerten eine Dosis von 75 mg/m<sup>2</sup> Docetaxel empfohlen; zudem sollten vor jedem Behandlungszyklus Leberfunktionswerte durchgeführt werden (siehe auch Abschnitt 4.2).

Bei Patienten, deren Serumalbumin größer als der obere Normalwert ist und/oder deren Transaminasewerte (ALT und AST) >3,5fach der oberen Normalwerte und für die alkalische Phosphatase das 6fache der oberen Normalwerte betragen, sollte Docetaxel nicht angewandt werden, es sei denn bei strenger Indikationsstellung. In dieser Situation kann keine Dosisempfehlung gegeben werden.

Es liegen keine Daten über eine Kombinationsbehandlung mit Docetaxel bei Patienten mit verminderter Leberfunktion vor.

**Patienten mit eingeschränkter Nierenfunktion**

Es liegen keine Daten von Patienten mit stark eingeschränkter Nierenfunktion vor, die mit Docetaxel behandelt wurden.

**Nervensystem**

Das Auftreten schwerer peripherer Neuropathien erfordert eine Dosisreduktion (siehe auch Abschnitt 4.2).

**Kardiotoxizität**

Herzinsuffizienz wurde bei Patientinnen beobachtet, die TAXOTERE in Kombination mit Trastuzumab erhielten, insbesondere im Anschluss an eine Chemotherapie, die ein Anthracyclin (Doxorubicin oder Epirubicin) beinhaltet. Die Herzinsuffizienz kann mäßig bis schwer sein und zum Tode führen (siehe Abschnitt 4.2).

Wenn Patientinnen für eine Behandlung mit Taxotere in Kombination mit Trastuzumab vorgesehen sind, sollten sie einer Prüfung der Ausgangs-Herzfunktion unterzogen werden. Die Herzfunktion sollte während der Therapie weiter überwacht werden (z. B. in Abständen von 3 Monaten), um Patientinnen zu identifizieren, die eine kardiale Dysfunktion entwickeln. Bezüglich weiterer Angaben siehe Zusammenfassung der Produktmerkmale/Fachinformationen von Trastuzumab.





## Sonstiges

Während der Therapie und mindestens bis drei Monate nach Beendigung müssen kontraceptive Maßnahmen getroffen werden.

## Zusätzliche Warnhinweise bei Anwendung zur adjuvanten Therapie von Brustkrebs

### Körperliche Neutropenie

Bei Patientinnen, bei denen eine komplizierte Neutropenie auftritt (verlängerte Neutropenie, febrile Neutropenie oder Infektion), sollte die Gabe von G-CSF und eine Dosisreduktion erwogen werden (siehe auch Abschnitt 4.2).

### Gastrointestinale Reaktionen

Symptome wie häufiges Auftreten von Abdominalschmerzen und Abreißfähigkeit, Fieber, Diarrhö, mit oder ohne Neutropenie, können wichtige Anzeichen einer schwerwiegenden gastrointestinalen Toxizität sein und sollten unverzüglich untersucht und behandelt werden.

### Kongestive Herzinsuffizienz

Patientinnen sollten hinsichtlich des Auftretens von Symptomen einer kongestiven Herzinsuffizienz während der Therapie und während der Folgezeit (follow-up-Periode) überwacht werden.

### Leukämie

Bei Frauen, die Taxotere, Doxorubicin und Cyclophosphamid (TAC) erhalten, ist das Risiko für eine akute myeloische Leukämie vergleichbar dem Risiko, das für andere Behandlungspläne, die Anthracyclin/Cyclophosphamid enthalten, beobachtet wurde.

### Patientinnen mit mehr als 4 positiven Lymphknoten

Das Nutzen-Risiko-Verhältnis für TAC bei Patientinnen mit mehr als 4 positiven Knoten konnte in der bislang vorliegenden Interimsanalyse nicht vollständig ausgewertet werden (siehe auch Abschnitt 5.1).

### Ältere Patientinnen

Für Patientinnen, die älter als 70 Jahre alt sind, liegen keine Daten für die Behandlung von Taxotere in Kombination mit Doxorubicin und Cyclophosphamid vor.

Von 333 Patientinnen, die in einer Studie zur Therapie des Prostatakarzinoms alle 3 Wochen mit Taxotere behandelt wurden, waren 200 Patientinnen 65 Jahre oder älter und 69 Patientinnen waren älter als 75 Jahre. Bei Patientinnen, die alle 3 Wochen mit Taxotere behandelt wurden, traten Nagelveränderungen im Zusammenhang mit der Behandlung bei Patientinnen, die älter als 65 Jahre alt waren, mehr als 10 % häufiger auf als bei jüngeren Patientinnen. Die Häufigkeit von Fieber, Diarrhö, Anorexie und peripheren Ödemen, die im Zusammenhang mit der Behandlung auftraten, war mehr als 10 % höher als bei Patientinnen, die jünger als 65 Jahre alt waren.

## 4.5 Wechselwirkungen mit anderen Arzneimitteln und sonstige Wechselwirkungen

Es sind keine formalen klinischen Studien zur Untersuchung der Wechselwirkungen von Docetaxel mit anderen Medikamenten durchgeführt worden.

In-vitro-Studien haben gezeigt, dass die Metabolisierung von Docetaxel durch die gleichzeitige Gabe von Substanzen, die Cytochrom P450-3A induzieren, inhibieren oder von ihm metabolisiert werden (dies kann eine kompetitive Hemmung auslösen), wie z. B. Ciclosporin, Terfenadin, Ketokonazol, Erythromycin und Troleandomycin, modifiziert werden kann. Daraus ergibt sich, dass bei einer gleichzeitigen Therapie mit diesen Medikamenten besondere Vorsicht geboten ist, da möglicherweise Wechselwirkungen auftreten können.

Docetaxel besitzt eine hohe Plasmaproteinbindungsrate (> 95 %). Obwohl mögliche in-vivo-Wechselwirkungen von Docetaxel mit gleichzeitig gegebenen Arzneimitteln formal nicht untersucht wurden, zeigen jedoch in-vitro-Untersuchungen mit Substanzen mit hoher Proteinbindung, wie Erythromycin, Diphenhydramin, Propranolol, Propafenon, Phenytoin, Salicylat, Sulfamethoxazol und Natriumvalproat keinen Einfluss auf die Proteinbindung von Docetaxel. Dies gilt auch für Dexamethason. Docetaxel beeinflusst nicht die Bindung von Digoxin.

Die Pharmakokinetik von Docetaxel, Doxorubicin und Cyclophosphamid wurde durch deren gleichzeitige Gabe nicht beeinflusst. Begrenzte Daten aus einer einzelnen nicht kontrollierten Studie wiesen auf eine Wechselwirkung zwischen Docetaxel und Carboplatin hin. In Kombination mit Docetaxel war die Carboplatin-Clearance etwa 50 % höher als in früheren Berichten für die Carboplatin-Monotherapie.

Die Pharmakokinetik von Docetaxel in Gegenwart von Prednison wurde bei Patientinnen mit metastasiertem Prostatakarzinom geprüft. Docetaxel wird durch CYP3A4 metabolisiert und von Prednison ist bekannt, dass es CYP3A4 induziert. Für Prednison wurde kein statistisch signifikanter Effekt auf die Pharmakokinetik von Docetaxel beobachtet.

## 4.6 Schwangerschaft und Stillzeit

Es gibt keine Informationen zum Einsatz von Docetaxel bei Schwangeren. Es konnte gezeigt werden, dass Docetaxel sowohl bei Kanarienvögeln als auch bei Ratten embryonal- und fetotoxisch wirkt und bei Ratten die Fruchtbarkeit vermindert. Wie andere zytotoxische Medikamente könnte auch Docetaxel bei Schwangeren zu Schäden am Fötus führen. Daher darf Docetaxel während der Schwangerschaft nicht angewandt werden. Frauen im gebärfähigen Alter, die Docetaxel erhalten, sollten dahingehend belehrt werden, dass sie nicht schwanger werden dürfen und dass der behandelnde Arzt umgehend zu informieren ist, sollte dies dennoch eintreten.

Docetaxel ist eine lipophile Substanz, es ist jedoch nicht bekannt, ob es in die Muttermilch übergeht. Aufgrund der potentiellen unerwünschten Wirkungen auf den Säugling muss daher das Stillen für die Dauer der Therapie mit Docetaxel unterbrochen werden.

## 4.7 Auswirkungen auf die Verkehrsfähigkeit und das Bedienen von Maschinen

Es ist unwahrscheinlich, dass Docetaxel die

Fähigkeit und das Bedienen von Maschinen beeinflusst.

## 4.8 Nebenwirkungen

Nebenwirkungen, welche möglicherweise oder wahrscheinlich auf die Gabe von TAXOTERE zurückzuführen sind, wurden beobachtet bei

- 1312 Patientinnen, die 100 mg/m<sup>2</sup> TAXOTERE als Monotherapie erhielten bzw. 121 Patientinnen, die 75 mg/m<sup>2</sup> TAXOTERE als Monotherapie erhielten
- 258 Patientinnen, die TAXOTERE in Kombination mit Doxorubicin erhielten
- 406 Patientinnen, die TAXOTERE in Kombination mit Cisplatin erhielten
- 92 Patientinnen, die TAXOTERE in Kombination mit Taxiduzumab erhielten
- 255 Patientinnen, die TAXOTERE in Kombination mit Capecitabin erhielten
- 332 Patientinnen, die TAXOTERE in Kombination mit Prednison oder Prednison erhielten (nur die klinisch relevanten Nebenwirkungen, die mit der Behandlung in Zusammenhang stehen, sind angegeben)
- 744 Patientinnen, die TAXOTERE in Kombination mit Doxorubicin und Cyclophosphamid erhielten (klinisch wichtige Nebenwirkungen, die mit der Behandlung in Zusammenhang stehen, werden genannt).

Zur Beschreibung der Nebenwirkungen wurden die NCI-Common Toxicity-Kriterien (grade 3 = G3; grade 3-4 = G3-4; grade 4 = G4) und die COSTART-Terminologie verwendet. Die Häufigkeitsangaben sind folgendermaßen definiert: sehr häufig (> 1/10); häufig (> 1/100, < 1/10); gelegentlich (> 1/1000, < 1/100); selten (> 1/10 000, < 1/1000); sehr selten (< 1/10 000).

Die häufigste Nebenwirkung ist eine nicht kumulative und reversible Neutropenie (siehe auch Abschnitt 4.2 und 4.4). Die Tiefstwerte der Neutrophilenzahlen werden im Median am Tag 7 erreicht und die mediane Dauer einer schweren Neutropenie (< 500 Zellen/mm<sup>3</sup>) beträgt 7 Tage.

Für die Kombination mit Trastuzumab werden unerwünschte Ereignisse (aller Stufen) dargestellt, die bei mehr als 10 % der Patientinnen beobachtet wurden.

Für die Kombination mit Trastuzumab im Vergleich zur Monotherapie mit Taxotere war ein Anstieg bezüglich des Auftretens von schwerwiegenden unerwünschten Ereignissen (40 % gegenüber 31 %) und Grad 4 Nebenwirkungen (34 % vs. 23 %) zu verzeichnen.

Bei der Kombination mit Capecitabin werden die häufigsten (≥ 5 %) mit der Behandlung im Zusammenhang stehenden Nebenwirkungen, die aus einer Phase II-Studie bei Brustkrebspatientinnen nachfolgeschlägender Anthracyclin-Therapie berichtet wurden, angegeben (vergleichbare Zusammenfassung der Produktmerkmale/Fachinformationen Capecitabin).

**Gutartige und bösartige Neubildungen (einschließlich Zysten und Polypen)**  
Bei zwei Patientinnen wurde Leukämie nach einer mittleren Nachbeobachtungszeit von 66 Monaten diagnostiziert und ein Fall von Leukämie wurde nach dieser Zeit berichtet. Es traten keine Fälle von myelodysplastischem Syndrom auf.





**TAXOTERE 80 mg**

Gruppe  
**sanofi aventis**

**Erkrankungen des Blutes und des Lymphsystems**

Knochenmarksuppression und andere hämatologische Nebenwirkungen wurden beobachtet.

**TAXOTERE 100 mg/m<sup>2</sup> Monotherapie:**  
Sehr häufig: Neutropenie (96,6 %; G4: 76,4 %; Anämie (90,4 %; G3/4: 69 %); Infektionen (20 %; G3/4: 5,7 %, einschließlich Sepsis und Pneumonie, fatal in 1,7 %); Neutropenie mit Fieber (11,8 %).

Häufig: Thrombozytopenie (7,8 %; G4: 0,2 %); G3/4-Infektionen mit Neutrophilenzahlen <600 Zellen/mm<sup>3</sup> (4,6 %; Blutungen (2,4 %).

Selten: Blutungen mit G3/4-Thrombozytopenie.

**TAXOTERE 75 mg/m<sup>2</sup> Monotherapie:**  
Sehr häufig: Neutropenie (99,8 %; G4: 54,2 %; Anämie (93,3 %; G3/4: 10,8 %); Infektionen (10,7 %; G3/4: 5 %); Thrombozytopenie (10 %; G4: 1,7 %).

Häufig: Neutropenie mit Fieber (8,3 %).

**TAXOTERE 75 mg/m<sup>2</sup> in Kombination mit Doxorubicin:**

Sehr häufig: Neutropenie (99,2 %; G4: 91,7 %; Anämie (96,1 %; G3/4: 9,4 %); Infektionen (8,3 %; G3/4: 7,8 %); Neutropenie mit Fieber (34,1 %); Thrombozytopenie (20,1 %; G4: 0,8 %).

**TAXOTERE 75 mg/m<sup>2</sup> in Kombination mit Cisplatin:**

Sehr häufig: Neutropenie (91,1 %; G4: 51,5 %; Anämie (88,6 %; G3/4: 6,9 %); Fieber ohne Infektion (17,2 %; G3/4: 1,2 %); Thrombozytopenie (14,9 %; G4: 0,5 %); Infektionen (14,3 %; G3/4: 6,7 %).

Häufig: Neutropenie mit Fieber (4,9 %).

**TAXOTERE 100 mg/m<sup>2</sup> in Kombination mit Trastuzumab:**

Sehr häufig: Neutropenie (G3/4: 32 %); Fibrile Neutropenie (einschließlich Neutropenie mit Fieber und Antibiotikagabe) oder neutropenische Sepsis (23 %); Nasopharyngitis (16 %).

Die hämatologische Toxizität war erhöht bei Patientinnen, die Trastuzumab und Docetaxel erhielten, im Vergleich zu Patientinnen, die nur Docetaxel erhielten (32 % Grad 3/4 Neutropenie gegenüber 22 % nach NCI-CTC-Kriterien). Die Häufigkeit von febriler Neutropenie/neutropenischer Sepsis war ebenfalls erhöht bei Patientinnen, die mit Trastuzumab plus Docetaxel behandelt wurden (23 % gegenüber 17 % bei Patientinnen, die mit Docetaxel allein behandelt wurden).

**TAXOTERE 75 mg/m<sup>2</sup> in Kombination mit Capecitabin:**

Sehr häufig: Neutropenie (G3/4: 63 %; Anämie (G3/4: 10 %).

Häufig: Thrombozytopenie (G3/4: 3 %).

**TAXOTERE 75 mg/m<sup>2</sup> in Kombination mit Prednison oder Prednisolon:**

Sehr häufig: Neutropenie (90,9 %; G3/4: 32 %); Anämie (86,6 %; G3/4: 4,9 %); Infektion (12,0 %; G3/4: 3,3 %).

Häufig: Thrombozytopenie (3,4 %; G3/4: 0,6 %); Neutropenie mit Fieber (2,7 %); Epistaxis (3,0 %; G3/4: 0 %).

**TAXOTERE 75 mg/m<sup>2</sup> in Kombination mit Doxorubicin and Cyclophosphamid:**

Sehr häufig: Anämie (91,5 %; G3/4: 4,3 %); Neutropenie (71,4 %; G3/4: 65,5 %); Fieber bei Abwesenheit von Infektion (43,1 %; G3/4: 1,2 %); Thrombozytopenie (29,4 %; G3/4: 2,0 %); Infektion (27,2 %; G3/4: 3,2 %); febrile Neutropenie (24,7 %); neutropenische Infektion (12,1 %).

Es gab keine Todesfälle durch Sepsis.

**Erkrankungen des Immunsystems**

Überempfindlichkeitsreaktionen traten im Allgemeinen wenige Minuten nach Beginn der Docetaxel-Infusion auf und waren gewöhnlich mild bis mäßig. Die am häufigsten berichteten Symptome waren Flush, Ausschlag mit oder ohne Juckreiz, Enggegehn in der Brust, Rückenschmerzen, Atemnot und Arzneimittelfieber oder Schüttelfrost. Schwere Reaktionen, die durch Hypertonie und/oder Bronchospasmen oder generalisierten Hautausschlag/Erythem gekennzeichnet sind, bildeten sich nach Absetzen der Infusion und einer geeigneten Therapie zurück (siehe auch Abschnitt 4.4).

**TAXOTERE 100 mg/m<sup>2</sup> Monotherapie:** sehr häufig (25,9 %; G3/4: 5,3 %).

**TAXOTERE 75 mg/m<sup>2</sup> Monotherapie:** häufig (2,5 %; keine schweren).

**TAXOTERE 75 mg/m<sup>2</sup> in Kombination mit Doxorubicin:** häufig (4,7 %; G3/4: 1,2 %).

**TAXOTERE 75 mg/m<sup>2</sup> in Kombination mit Cisplatin:** sehr häufig (106,7 %; G3/4: 2,6 %).

**TAXOTERE 75 mg/m<sup>2</sup> in Kombination mit Prednison oder Prednisolon:** häufig (6,9 %; G3/4: 0,6 %).

**TAXOTERE 75 mg/m<sup>2</sup> in Kombination mit Doxorubicin und Cyclophosphamid:** sehr häufig (10,5 %; G3/4: 1,1 %).

**Funktionsstörungen der Haut und des Unterhautzellgewebes**

Reversible Hautreaktionen wurden beobachtet und allgemein als mild bis mäßig betrachtet. Hautveränderungen manifestierten sich entweder lokalisiert hauptsächlich an Füßen und Händen, aber auch an Armen, im Gesicht oder am Brustkorb und waren häufig verbunden mit Juckreiz. Die Reaktionen traten im Allgemeinen innerhalb einer Woche nach Infusion von Docetaxel auf. Weniger häufig traten schwere Symptome wie Hautausschläge gefolgt von Abschülbungen auf, die in sehr wenigen Fällen zur Unterbrechung oder zum Abbruch der Behandlung mit Docetaxel führten (siehe auch Abschnitt 4.2 und 4.4).

Schwere Nagelveränderungen gehen mit Hypo- oder Hyperpigmentierung und manchmal mit Schmerzen und Nagelablösungen einher. Es wurde über sehr seltene Fälle von bullösen Hautausschlägen wie Erythema multiforme oder Stevens-Johnson-Syndrom unter Docetaxel berichtet, wobei auch andere, gleichzeitig vorhandene Faktoren zu der Entwicklung dieser Effekte beigetragen haben könnten.

**TAXOTERE 100 mg/m<sup>2</sup> Monotherapie:**

Sehr häufig: Alopecie (79 %); Hautreaktionen (56,6 %; G3/4: 5,9 %); Nagelveränderungen (27,9 %; schwer 2,6 %).

Sehr selten: ein Fall einer nicht reversiblen Alopecie am Ende der Studie. 73 % der Hautreaktionen waren innerhalb von 21 Tagen reversibel.

**TAXOTERE 75 mg/m<sup>2</sup> Monotherapie:**  
Sehr häufig: Alopecie (38 %); Hautreaktionen (16,7 %; G3/4: 0,8 %).

Häufig: Nagelveränderungen (9,9 %; schwer 0,8 %).

**TAXOTERE 75 mg/m<sup>2</sup> in Kombination mit Doxorubicin:**

Sehr häufig: Alopecie (94,6 %); Nagelveränderungen (20,2 %; schwer 0,4 %); Hautreaktionen (13,6 %; keine schweren).

**TAXOTERE 75 mg/m<sup>2</sup> in Kombination mit Cisplatin:**

Sehr häufig: Alopecie (73,6 %); Nagelveränderungen (13,3 %; schwer 0,7 %); Hautreaktionen (11,1 %; G3/4: 0,2 %).

**TAXOTERE 100 mg/m<sup>2</sup> in Kombination mit Trastuzumab:**

Sehr häufig: Alopecie (67 %); Erythem (2,3 %); Flush (2,4 %); Nagelveränderungen (1,7 %).

**TAXOTERE 75 mg/m<sup>2</sup> in Kombination mit Capecitabin:**

Sehr häufig: Hand-Fuß-Syndrom (6,3 %; G3/4: 2,4 %); Alopecie (4,1 %; G3/4: 6 %); Nagelveränderungen (1,4 %; G3/4: 2 %).

Häufig: Dermatitis (8 %); Erythematöse Rötung (8 %; G3/4: <1 %); Nagelverfärbung (6 %); Onycholyse (5 %; G3/4: 1 %).

**TAXOTERE 75 mg/m<sup>2</sup> in Kombination mit Prednison oder Prednisolon:**

Sehr häufig: Alopecie (95,1 %); Nagelveränderungen (28,3 %; nicht schwer).

Häufig: Rash/Hautschuppung (3,3 %; G3/4: 0,3 %).

**TAXOTERE 75 mg/m<sup>2</sup> in Kombination mit Doxorubicin und Cyclophosphamid:**

Sehr häufig: Alopecie (97,7 %); Hauttoxizität (18,4 %; G3/4: 0,7 %); Nagelveränderungen (18,4 %; G3/4: 0,4 %).

Bei einer mittleren Nachbeobachtungszeit von 65 Monaten dauerte die Alopecie bei 22 von 67 Patientinnen mit Alopecie am Ende der Chemotherapie an.

**Flüssigkeitsretention**

Es wurde über Nebenwirkungen wie periphere Ödeme und weniger häufig Pleurergüsse, Perikardergüsse, Ascites und Gewichtszunahme berichtet. Die peripheren Ödeme zeigen sich normalerweise zuerst in den unteren Extremitäten und können sich dann weiter ausbreiten und zu einer Gewichtszunahme von 3 kg oder mehr führen. Die Flüssigkeitsretention ist bezüglich Häufigkeit und Schwere von der kumulativ verabreichten Docetaxeldosis abhängig (siehe auch Abschnitt 4.4).

**TAXOTERE 100 mg/m<sup>2</sup> Monotherapie:** sehr häufig (64,1 %; schwer 6,5 %).

Bei Patienten, die mit TAXOTERE als Monotherapie in einer Dosierung von 100 mg/m<sup>2</sup> behandelt worden waren, betrug die mediane kumulative Dosis, die zum Abbruch der Behandlung führte, mehr als 1000 mg/m<sup>2</sup> und die mediane Zeit zur Reversibilität der Flüssigkeitsretention 16,4 Wochen (Spanne von 0–42 Wochen). Das Einsetzen einer mäßigen und schweren Retention ist bei Patienten mit Palmedikation (kumulative Dosis im Median: 818,9 mg/m<sup>2</sup>) im Vergleich zu Patienten ohne

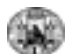

Prämedikation (kumulative Dosis im Median: 489,7 mg/m<sup>2</sup>) verzögert. Bei einigen Patienten wurde sie jedoch bereits in den ersten Therapiezyklen beobachtet.

**TAXOTERE 75 mg/m<sup>2</sup> Monotherapie:** Sehr häufig (≥40 %; schwer) 0 %.

**TAXOTERE 75 mg/m<sup>2</sup> in Kombination mit Doxorubicin:** Sehr häufig (56,7 %; schwer) 12 %.

**TAXOTERE 75 mg/m<sup>2</sup> in Kombination mit Cisplatin:** Sehr häufig (26,9 %; schwer) 0,7 %.

**TAXOTERE 100 mg/m<sup>2</sup> in Kombination mit Trastuzumab:** Sehr häufig; periphere Ödeme (60 %); Lymphödeme (11 %).

**TAXOTERE 75 mg/m<sup>2</sup> in Kombination mit Prednison oder Prednisolon:** Sehr häufig (24,4 %; schwer) 0,6 %.

**TAXOTERE 75 mg/m<sup>2</sup> in Kombination mit Doxorubicin und Cyclophosphamid:** Sehr häufig; Periphere Ödeme (26,7 %; G3/4: 0,4 %).

Gelegentlich: Lymphödeme (0,3 %; G3/4: 0 %).  
Bei einer mittleren Nachbeobachtungszeit von 55 Monaten dauerten periphere Ödeme bei 18 von 112 Patientinnen mit peripheren Ödemen am Ende der Chemotherapie an.

Die Flüssigkeitsretentionen waren nicht von akuter Oligurie oder niederm Blutdruck begleitet. Von Dehydritation und Lungenödem wurde nur selten berichtet.

#### Gastrointestinale Beschwerden

**TAXOTERE 100 mg/m<sup>2</sup> Monotherapie:** Sehr häufig; Stomatitis (41,8 %; G3/4: 6,3 %); Diarrhö (40,6 %; G3/4: 4 %); Übelkeit (40,5 %; G3/4: 4 %); Erbrechen (24,5 %; G3/4: 3 %).

Häufig: Geschmacksveränderungen (10,1 %; schwer) 0,07 %; Obstipation (9,8 %; schwer) 0,2 %; Bauchschmerzen (7,3 %; schwer) 1 %; Gastrointestinale Blutungen (1,4 %; schwer) 0,3 %.  
Gelegentlich: Ösophagitis (1 %; schwer) 0,4 %.

**TAXOTERE 75 mg/m<sup>2</sup> Monotherapie:** Sehr häufig; Übelkeit (20,9 %; G3/4: 3,3 %); Stomatitis (24,8 %; G3/4: 1,7 %); Erbrechen (16,5 %; G3/4: 0,8 %); Diarrhö (11,6 %; G3/4: 1,7 %).  
Häufig: Obstipation (6,6 %).

**TAXOTERE 75 mg/m<sup>2</sup> in Kombination mit Doxorubicin:** Sehr häufig; Übelkeit (64 %; G3/4: 5 %); Stomatitis (56,1 %; G3/4: 7,8 %); Diarrhö (46,7 %; G3/4: 6,2 %); Erbrechen (45 %; G3/4: 5 %); Obstipation (14,3 %).

**TAXOTERE 75 mg/m<sup>2</sup> in Kombination mit Cisplatin:** Sehr häufig; Übelkeit (69 %; G3/4: 9,6 %); Erbrechen (53,4 %; G3/4: 7,6 %); Diarrhö (41,1 %; G3/4: 6,4 %); Stomatitis (23,4 %; G3/4: 2 %).  
Häufig: Obstipation (9,4 %).

**TAXOTERE 100 mg/m<sup>2</sup> in Kombination mit Trastuzumab:** Sehr häufig; Übelkeit (43 %); Diarrhö (40 %); Erbrechen (29 %); Obstipation (27 %); Stomatitis (20 %); Dyspepsie (14 %); Abdominalschmerzen (12 %).

**TAXOTERE 75 mg/m<sup>2</sup> in Kombination mit Capecitabin:**

Sehr häufig; Stomatitis (67 %; G3/4: 10 %); Diarrhö (64 %; G3/4: 14 %); Übelkeit (43 %; G3/4: 6 %); Erbrechen (33 %; G3/4: 4 %); Geschmacksveränderungen (15 %; G3/4: <1 %); Obstipation (14 %; G3/4: 1 %); Bauchschmerzen (14 %; G3/4: 2 %); Dyspepsie (12 %).  
Häufig: Oberbauchbeschwerden (9 %; Mundtrockenheit (6 %)).

**TAXOTERE 75 mg/m<sup>2</sup> in Kombination mit Prednison oder Prednisolon:** Sehr häufig; Übelkeit (35,5 %; G3/4: 2,4 %); Diarrhö (24,1 %; G3/4: 1,2 %); Stomatitis/Pharyngitis (17,8 %; G3/4: 0,9 %); Geschmacksstörungen (17,5 %; G3/4: 0 %); Erbrechen (13,3 %; G3/4: 1,2 %).

**TAXOTERE 75 mg/m<sup>2</sup> in Kombination mit Doxorubicin und Cyclophosphamid:** Sehr häufig; Übelkeit (30,4 %; G3/4: 5,1 %); Stomatitis (29,1 %; G3/4: 7,1 %); Erbrechen (22,6 %; G3/4: 4,3 %); Diarrhö (20,9 %; G3/4: 3,2 %); Geschmacksveränderungen (27,4 %; G3/4: 0,7 %); Obstipation (22,6 %; G3/4: 0,4 %).  
Häufig: Abdominalschmerzen (7,3 %; G3/4: 0,5 %).  
Gelegentlich: Kolitis/Enteritis/ausgedehnte intestinale Perforation (0,5 %).

Bei zwei Patientinnen war ein Therapieabbruch erforderlich; es traten keine Todesfälle aufgrund dieser Ereignisse auf.

In seltenen Fällen wurde über Dehydritation als Folge gastrointestinaler Störungen, gastrointestinaler Perforationen, ischämischer Kolitis, Kolitis und Neutropenie induzierter Enterokolitis berichtet. Sehr selten kam es zu Ileus und Darmverschluss.

#### Störungen des Nervensystems

Die Entstehung schwerer, peripherer neurologischer Nebenwirkungen erfordert eine Dosisreduktion (siehe Abschnitt 4.2 und 4.4). Milde bis moderate neurosensorische Anzeichen sind gekennzeichnet durch Parästhesien, Sensibilitätsstörungen oder Schmerzen inklusive brennende Schmerzen. Neurosensorische Nebenwirkungen äußern sich hauptsächlich als Schwäche.

**TAXOTERE 100 mg/m<sup>2</sup> Monotherapie:** Sehr häufig; neurosensorische Störungen (60 %; G3: 4,1 %); neurosensorische Störungen (13,8 %; G3/4: 4 %).

Daten hinsichtlich der Rückbildung dieser Störungen liegen bei 35,3 % der Patienten vor, die unter der Behandlung mit TAXOTERE als Monotherapie in einer Dosisierung von 100 mg/m<sup>2</sup> eine Neurotoxizität entwickelt hatten. Diese Nebenwirkungen bildeten sich innerhalb von 3 Monaten spontan zurück.

**TAXOTERE 75 mg/m<sup>2</sup> Monotherapie:** Sehr häufig; neurosensorische Störungen (24 %; G3: 0,8 %).  
Häufig; neurosensorische Störungen (9,9 %; G3/4: 2,5 %).

**TAXOTERE 75 mg/m<sup>2</sup> in Kombination mit Doxorubicin:** Sehr häufig; neurosensorische Störungen (30,2 %; G3: 0,4 %).  
Häufig; neurosensorische Störungen (2,3 %; G3/4: 0,4 %).

**TAXOTERE 75 mg/m<sup>2</sup> in Kombination mit Cisplatin:**

Sehr häufig; neurosensorische Störungen (60,4 %; G3: 3,7 %); neurosensorische Störungen (12,8 %; G3/4: 2 %).

**TAXOTERE 100 mg/m<sup>2</sup> in Kombination mit Trastuzumab:** Sehr häufig; Parästhesie (32 %); Kopfschmerzen (21 %); Dyspepsie (14 %); Hypoästhesie (1 %).

**TAXOTERE 75 mg/m<sup>2</sup> in Kombination mit Capecitabin:** Sehr häufig; Parästhesie (11 %; G3/4: <1 %).

Häufig; Schwindel (9 %); Kopfschmerzen (7 %; G3/4: <1 %); periphere Neuropathie (6 %).

**TAXOTERE 75 mg/m<sup>2</sup> in Kombination mit Prednison oder Prednisolon:** Sehr häufig; Neurosensorische Störungen (27,4 %; G3/4: 1,2 %).

Häufig; Neurosensorische Störungen (3,9 %; G3/4: 0 %).

**TAXOTERE 75 mg/m<sup>2</sup> in Kombination mit Doxorubicin und Cyclophosphamid:** Sehr häufig; neurosensorische Störungen (23,8 %; G3/4: 0 %).  
Häufig; neurosensorische Störungen (2,8 %; G3/4: 0 %); neurosensorische Störungen (2,8 %; G3/4: 0,3 %); neurosensorische Störungen (1,1 %; G3/4: 0,1 %).  
Gelegentlich: Synkope (0,5 %; G3/4: 0 %).

Bei einer mittleren Nachbeobachtungszeit von 55 Monaten dauerten neurosensorische Störungen bei 9 von 70 Patientinnen mit neurosensorischen Störungen am Ende der Chemotherapie an.

Unter der Doxorubicin-Gabe wurden in seltenen Fällen Krämpfe oder vorübergehende Bewusstlosigkeit beobachtet. Diese Reaktionen treten manchmal während der Infusionslauf.

#### Funktionsstörungen des Herzens

**TAXOTERE 100 mg/m<sup>2</sup> Monotherapie:** Häufig; Herzrhythmusstörungen (4,1 %; G3/4: 0,7 %); Hypotonie (3,8 %); Hypertonie (2,4 %).

Gelegentlich; Herzversagen (0,5 %).  
**TAXOTERE 75 mg/m<sup>2</sup> Monotherapie:** Häufig; Herzrhythmusstörungen (2,5 %; keine schweren); Hypotonie (1,7 %).

**TAXOTERE 75 mg/m<sup>2</sup> in Kombination mit Doxorubicin:** Häufig; Herzversagen (2,3 %); Herzrhythmusstörungen (1,2 %; keine schweren).  
Gelegentlich; Hypotonie (0,4 %).

**TAXOTERE 75 mg/m<sup>2</sup> in Kombination mit Cisplatin:** Häufig; Hypotonie (3,7 %; G3/4: 0,7 %); Herzrhythmusstörungen (2,5 %; G3/4: 0,7 %).  
Gelegentlich; Herzversagen (0,5 %).

**TAXOTERE 100 mg/m<sup>2</sup> in Kombination mit Trastuzumab:** Symptomatische Herzinsuffizienz wurde von 2,2 % der Patientinnen berichtet, die TAXOTERE zusammen mit Trastuzumab erhielten gegenüber 0 % der Patientinnen, die TAXOTERE allein erhielten.

In dem TAXOTERE plus Trastuzumab-Arm, hatten 64 % der Patientinnen zwar ein Anthracyclin als adjuvante Therapie erhalten gegenüber 55 % im Doxorubicin-(Mono-)Arm.



**TAXOTERE 80 mg**

Gruppe  
**sanofi aventis**

**TAXOTERE 75 mg/m<sup>2</sup> in Kombination mit Capecitabin:**

Sehr häufig: Ödeme der unteren Extremitäten (14 %; G3/4: 1 %).

**TAXOTERE 75 mg/m<sup>2</sup> in Kombination mit Prednison oder Prednisolon:**

Häufig: Linkventrikuläre Funktionsstörung (39 %; G3/4: 0,3 %).

**TAXOTERE 75 mg/m<sup>2</sup> in Kombination mit Doxorubicin und Cyclophosphamid:**

Sehr häufig: Vasodilatation (20,3 %; G3/4: 0,9 %).

Häufig: kardiale Rhythmusstörung (3,9 %; G3/4: 0,1 %); Hypotonie (1,6 %; G3/4: 0 %).

Dekompensierte Herzinsuffizienz (1,6 %) wurde auch berichtet, in jedem Behandlungsarm starb eine Patientin aufgrund von Herzinsuffizienz.

In seltenen Fällen wurde über Myokardinfarkt berichtet.

**Gefäßerkrankungen****TAXOTERE 75 mg/m<sup>2</sup> in Kombination mit Doxorubicin und Cyclophosphamid:**

Gelegentlich: Phlebitis (0,7 %; G3/4: 0 %).

Über das Auftreten von Thromboembolien wurde selten berichtet.

**Leber- und Gallenerkrankungen****TAXOTERE 100 mg/m<sup>2</sup> Monotherapie:**

Häufig: G3/4 Bilirubin-Anstieg (<5 %); G3/4 Anstieg der alkalischen Phosphatase (<4 %); G3/4 AST-Anstieg (<3 %); G3/4 ALT-Anstieg (<2 %).

**TAXOTERE 75 mg/m<sup>2</sup> Monotherapie:**

Häufig: G3/4 Bilirubin-Anstieg (<2 %).

**TAXOTERE 75 mg/m<sup>2</sup> in Kombination mit Doxorubicin:**

Häufig: G3/4 Bilirubin-Anstieg (<2,6 %); G3/4 Anstieg der alkalischen Phosphatase (<2,5 %).

Gelegentlich: G3/4 AST-Anstieg (<1 %); G3/4 ALT-Anstieg (<1 %).

**TAXOTERE 75 mg/m<sup>2</sup> in Kombination mit Cisplatin:**

Häufig: G3/4 Bilirubin-Anstieg (2,1 %); G3/4 ALT-Anstieg (1,3 %).

Gelegentlich: G3/4 AST-Anstieg (0,5 %); G3/4 ALT-Anstieg der alkalischen Phosphatase (0,3 %).

**TAXOTERE 75 mg/m<sup>2</sup> in Kombination mit Capecitabin:**

Häufig: Hyperbilirubinämie (G3/4: 9 %).

In sehr seltenen Fällen wurde von einer Hepatitis berichtet.

**Stoffwechsel- und Ernährungsstörungen****TAXOTERE 100 mg/m<sup>2</sup> Monotherapie:**

sehr häufig: Anorexie (16,8 %).

**TAXOTERE 75 mg/m<sup>2</sup> Monotherapie:**

sehr häufig: Anorexie (19 %).

**TAXOTERE 75 mg/m<sup>2</sup> in Kombination mit Doxorubicin:**

Häufig: Anorexie (8,5 %).

**TAXOTERE 75 mg/m<sup>2</sup> in Kombination mit Cisplatin:**

sehr häufig: Anorexie (28,8 %).

**TAXOTERE 100 mg/m<sup>2</sup> in Kombination mit Trastuzumab:**

Sehr häufig: Anorexie (22 %); Gewichtszunahme (15 %).

**TAXOTERE 75 mg/m<sup>2</sup> in Kombination mit Capecitabin:**

Sehr häufig: Anorexie (12 %; G3/4: 1 %); Appetitverlust (10 %).

Häufig: Dehydrierung (8 %; G3/4: 2 %); Gewichtverlust (6 %).

**TAXOTERE 75 mg/m<sup>2</sup> in Kombination mit Prednison oder Prednisolon:**

Sehr häufig: Anorexie (12,7 %; G3/4: 0,6 %).

**TAXOTERE 75 mg/m<sup>2</sup> in Kombination mit Doxorubicin und Cyclophosphamid:**

Sehr häufig: Anorexie (19,9 %; G3/4: 2,2 %); Gewichtszunahme oder -verlust (16,2 %; G3/4: 0,3 %).

**Augenerkrankungen**

In sehr seltenen Fällen wurde von vorübergehenden Sehstörungen (Lichtblitze, Skotome) berichtet, die typischerweise während der Infusion und in Verbindung mit Überempfindlichkeitsreaktionen auftraten. Sie waren nach Abbruch der Infusion reversibel.

Selten wurde über Iritis mit oder ohne Konjunktivitis und über Tränenkanalverschluss mit übermäßigem Augentänen berichtet.

**TAXOTERE 100 mg/m<sup>2</sup> in Kombination mit Trastuzumab:**

Sehr häufig: erhöhte Tränensekretion (21 %); Konjunktivitis (12 %).

**TAXOTERE 75 mg/m<sup>2</sup> in Kombination mit Capecitabin:**

Sehr häufig: erhöhte Tränensekretion (12 %).

**TAXOTERE 75 mg/m<sup>2</sup> in Kombination mit Prednison oder Prednisolon:**

Häufig: Tränensekretion (8,3 %; G3/4: 0,6 %).

**TAXOTERE 75 mg/m<sup>2</sup> in Kombination mit Doxorubicin und Cyclophosphamid:**

Häufig: gestörte Tränensekretion (8,8 %; G3/4: 0,1 %); Konjunktivitis (8,6 %; G3/4: 0,3 %).

**Psychiatrische Erkrankungen****TAXOTERE 100 mg/m<sup>2</sup> in Kombination mit Trastuzumab:**

Sehr häufig: Schlaflosigkeit (11 %).

**Skelettmuskulatur-, Bindegewebs- und Knochenkrankungen****TAXOTERE 100 mg/m<sup>2</sup> Monotherapie:**

Sehr häufig: Myalgie (20 %; schwer 1,4 %).

Häufig: Arthralgie (8,6 %).

**TAXOTERE 75 mg/m<sup>2</sup> Monotherapie:**

Häufig: Myalgie (5,8 %).

**TAXOTERE 75 mg/m<sup>2</sup> in Kombination mit Doxorubicin:**

Häufig: Myalgie (8,5 %).

**TAXOTERE 75 mg/m<sup>2</sup> in Kombination mit Cisplatin:**

Sehr häufig: Myalgie (13,8 %; schwer 0,5 %).

**TAXOTERE 100 mg/m<sup>2</sup> in Kombination mit Trastuzumab:**

Sehr häufig: Myalgie (27 %); Arthralgie (27 %); Schmerzen in den Extremitäten (16 %); Knochenschmerzen (14 %); Rückenschmerzen (10 %).

**TAXOTERE 75 mg/m<sup>2</sup> in Kombination mit Capecitabin:**

Sehr häufig: Myalgie (14 %; G3/4: 2 %); Arthralgie (11 %; G3/4: 1 %).

Häufig: Rückenschmerzen (7 %; G3/4: 1 %).

**TAXOTERE 75 mg/m<sup>2</sup> in Kombination mit Prednison oder Prednisolon:**

Häufig: Arthralgie (3,0 %; G3/4: 0,3 %); Myalgie (6,9 %; G3/4: 0,3 %).

**TAXOTERE 75 mg/m<sup>2</sup> in Kombination mit Doxorubicin und Cyclophosphamid:**

Sehr häufig: Myalgie (22,8 %; G3/4: 0,8 %); Arthralgie (15,1 %; G3/4: 0,4 %).

**Erkrankungen der Atemwege, des Brustraums und Mediastinums****TAXOTERE 100 mg/m<sup>2</sup> Monotherapie:**

Sehr häufig: Dyspnoe (16,1 %; schwer 2,7 %).

**TAXOTERE 100 mg/m<sup>2</sup> in Kombination mit Trastuzumab:**

Sehr häufig: Epistaxis (16 %); Pharyngolaryngeale Schmerzen (16 %); Dyspnoe (14 %); Husten (13 %); Rhinorrhö (12 %).

**TAXOTERE 75 mg/m<sup>2</sup> in Kombination mit Capecitabin:**

Sehr häufig: entzündeter Rachen (11 %; G3/4: 2 %).

Häufig: Dyspnoe (7 %; G3/4: 1 %); Husten (6 %; G3/4: <1 %); Epistaxis (5 %; G3/4: <1 %).

**TAXOTERE 75 mg/m<sup>2</sup> in Kombination mit Prednison oder Prednisolon:**

Häufig: Dyspnoe (4,5 %; G3/4: 0,6 %); Husten (1,2 %; G3/4: 0 %).

**TAXOTERE 75 mg/m<sup>2</sup> in Kombination mit Doxorubicin und Cyclophosphamid:**

Häufig: Husten (3,1 %; G3/4: 0 %).

Ein akutes Atemnotsyndrom, interstielle Pneumonie und Lungenfibrose wurden selten beobachtet.

**Erkrankungen der Geschlechtsorgane und der Brustdrüse****TAXOTERE 75 mg/m<sup>2</sup> in Kombination mit Doxorubicin und Cyclophosphamid:**

Sehr häufig: Amenorrhö (57,6 %).

Bei einer mittleren Nachbeobachtungszeit von 95 Monaten dauerte die Amenorrhö bei 133 von 203 Patientinnen mit Amenorrhö am Ende der Chemotherapie an.

**Allgemeine Störungen und Reaktionen an der Applikationsstelle**

Reaktionen an der Einstichstelle waren in der Regel schwach ausgeprägt und äußerten sich in Hyperpigmentierungen, Entzündungen, Hautrötungen oder Hauttrockenheit, Phlebitis oder Extravasaten und Venenschwellungen.

**TAXOTERE 100 mg/m<sup>2</sup> Monotherapie:**

Sehr häufig: Asthenie (32,6 %; schwer 11,2 %); Schmerz (16,5 %).

Häufig: Reaktionen an der Einstichstelle (6,6 %); Brustschmerzen (4,5 %; schwer 0,4 %) ohne kardiale bzw. respiratorische Beteiligung.

**TAXOTERE 75 mg/m<sup>2</sup> Monotherapie:**

Sehr häufig: Asthenie (48,8 %; schwer 12,4 %); Schmerz (10,7 %).



**TAXOTERE 75 mg/m<sup>2</sup> in Kombination mit Doxorubicin:**

Sehr häufig: Asthenie (54,7 %; schwer 0,1 %); Schmerz (17,1 %).  
Häufig: Reaktionen an der Einstichstelle (3,1 %).

**TAXOTERE 75 mg/m<sup>2</sup> in Kombination mit Cisplatin:**

Sehr häufig: Asthenie (51,5 %; schwer 9,9 %).  
Häufig: Reaktionen an der Einstichstelle (6,2 %); Schmerz (5,4 %).

**TAXOTERE 100 mg/m<sup>2</sup> in Kombination mit Thiotiazinab:**

Sehr häufig: Asthenie (45 %), Pyrexie (29 %), Müdigkeit (24 %), Schleimhautentzündung (23 %), Schmerzen (12 %), Infenzahnähnliche Erkrankung (12 %), Brustschmerzen (11 %), Riser (11 %).  
Häufig: Lethargie (7 %).

**TAXOTERE 75 mg/m<sup>2</sup> in Kombination mit Gipegibidin:**

Sehr häufig: Asthenie (23 %; G3/4: 3 %); Pyrexie (21 %; G3/4: 1 %); Abgeschlagenheit (21 %; G3/4: 4 %); Schwäche (13 %; G3/4: 1 %).  
Häufig: Gliederschmerzen (9 %; G3/4: <1 %); Lethargie (6 %); Schmerzen (6 %); Mundandulsi (6 %; G3/4: <1 %).

**TAXOTERE 75 mg/m<sup>2</sup> in Kombination mit Prochlorin oder Prochlorin:**

Sehr häufig: Müdigkeit (42,0 %; G3/4: 3,9 %).

**TAXOTERE 75 mg/m<sup>2</sup> in Kombination mit Doxorubicin und Cyclophosphamid:**

Sehr häufig: Asthenie (79,2 %; G3/4: 11 %).

Über statininduzierte Reaktionen (sog. Radiation-Recall-Phänomen) wurde selten berichtet.

**Verletzung, Vergiftung und durch Eingriffe bedingte Komplikationen**

**TAXOTERE 100 mg/m<sup>2</sup> in Kombination mit Thiotiazinab:** Sehr häufig: Nageltoxizität (11 %).

**4.9 Überdosierung**

Es wurde über wenige Fälle einer Überdosierung berichtet. Es steht kein spezifisches Antidot für Docetaxel zur Verfügung. Im Falle einer Überdosierung ist die Einweisung des Patienten in eine entsprechende Einrichtung sowie die engmaschige Kontrolle der vitalen Funktionen angezeigt. Die primär zu erwartenden Komplikationen einer Überdosierung sind Knochenmarksuppression, periphere Neuropathie und Muko-sitis. Patienten sollten nach einer festgestellten Überdosierung so schnell wie möglich G-CSF in therapeutischer Dosierung erhalten. Je nach Bedarf sollten weitere geeignete Maßnahmen ergriffen werden.

**5. PHARMAKOLOGISCHE EIGENSCHAFTEN**

**5.1 Pharmakodynamische Eigenschaften**

Pharmakotherapeutische Gruppe: Antineoplastische Mittel, ATC-Code: L03CD02

**Präklinische Daten**

Docetaxel ist eine antineoplastisch wirksame Substanz, deren Wirkung auf einer gesteigerten Polymerisation von Tubulin zu stabilen Mikrotubuli beruht. Gleichzeitig wird die Depolymerisation gehemmt, was zu einer deutlichen Abnahme an freiem Tubulin führt. Die Anlagerung von Docetaxel an die Mikrotubululänderung führt zu einer Verfestigung der Mikrotubululänderung, was zu einer Verfestigung der Mikrotubululänderung führt.

| Patientengruppe                | Zahl der Patientinnen | Krankheitsfreies Überleben |           |        | Gesamtüberlebenszeit |           |        |
|--------------------------------|-----------------------|----------------------------|-----------|--------|----------------------|-----------|--------|
|                                |                       | Hazard Ratio*              | 95 % CI   | P=     | Hazard Ratio*        | 95 % CI   | P=     |
| Zahl der positiven Lymphknoten |                       |                            |           |        |                      |           |        |
| Gesamt                         | 746                   | 0,72                       | 0,59–0,88 | 0,001  | 0,70                 | 0,59–0,81 | 0,008  |
| 1–3                            | 467                   | 0,61                       | 0,46–0,82 | 0,0008 | 0,46                 | 0,29–0,70 | 0,0002 |
| 4+                             | 278                   | 0,83                       | 0,63–1,08 | 0,17   | 0,94                 | 0,66–1,33 | 0,72   |

\*Ein Hazard Ratio von weniger als 1 zeigt an, dass TAC im Verhältnis zu FAC mit einer längeren krankheitsfreien Überlebenszeit und Gesamtüberlebenszeit einhergeht.

blen Mikrotubuli beruht. Gleichzeitig wird die Depolymerisation gehemmt, was zu einer deutlichen Abnahme an freiem Tubulin führt. Die Anlagerung von Docetaxel an die Mikrotubululänderung führt zu einer Verfestigung der Mikrotubululänderung, was zu einer Verfestigung der Mikrotubululänderung führt.

in-vitro-Untersuchungen zeigen, dass Docetaxel das mikrotubuläre Netzwerk der Zellen zerstört, welches für lebenswichtige Zellfunktionen der Mitose- und Interphasen essenziell ist.

Docetaxel ist in vitro zytotoxisch gegenüber verschiedenen tierischen und menschlichen Tumorzelllinien und in klonogenen Assays gegen frisch biopsierte menschliche Tumorzellen. Docetaxel erreicht hohe intrazelluläre Konzentrationen und eine lange intrazelluläre Verweildauer. Zusätzlich war Docetaxel bei einigen, aber nicht allen Zelllinien aktiv, die vermehrt p-glykoprotein bilden, das auf dem „Multidrug Resistance Gene“ codiert ist. In vivo wird Docetaxel unabhängig vom Applikationszeitpunkt und zeigt ein breites Aktivitätsspektrum gegenüber fortgeschrittenen Mammotumoren und menschlichen Xenografttumoren.

**Klinische Daten**

**Brustkrebs**

**TAXOTERE in Kombination mit Doxorubicin und Cyclophosphamid: adjuvante Therapie**

Die Daten einer multizentrischen offenen randomisierten Studie stützen die Anwendung von TAXOTERE für die adjuvante Behandlung von Patientinnen mit operablem, nodal positivem Brustkrebs und KPS  $\geq 80$  % zwischen 18 und 70 Jahren. Nach Stratifikation nach der Zahl der betroffenen Lymphknoten (1–3, >4), wurden 1491 Patientinnen randomisiert und erhielten entweder 1 Stunde nach Gabe von Doxorubicin 50 mg/m<sup>2</sup> und Cyclophosphamid 500 mg/m<sup>2</sup> TAXOTERE 75 mg/m<sup>2</sup> (TAC-Arm) oder Doxorubicin 50 mg/m<sup>2</sup> gefolgt von Fluorouracil 500 mg/m<sup>2</sup> und Cyclophosphamid 500 mg/m<sup>2</sup> (FAC-Arm). Beide Therapiegruppen wurden alle 3 Wochen einmal über 6 Zyklen gegeben.

TAXOTERE wurde als 1-stündige Infusion gegeben, alle anderen Arzneimittel wurden als iv-Bolus am ersten Tag gegeben. G-CSF wurde als Sekundärprophylaxe Patientinnen verabreicht, bei denen eine komplizierte Neutropenie auftrat (febrile Neutropenie, verlängerte Neutropenie oder Infektion). Patientinnen im TAC-Arm erhielten eine antibiotische Prophylaxe mit Ciprofloxacin 500 mg oral zweimal täglich über 10 Tage beginnend am Tag 5 jedes Zyklus oder eine

vergleichbare Therapie. In beiden Armen erlitten Patientinnen mit positivem Estrogen- und/oder Progesteron-Rezeptor-Status nach dem letzten Zyklus der Chemotherapie täglich 20 mg Tamoxifen über 5 Jahre. Ergänzend wurde in den teilnehmenden Einrichtungen eine Bestrahlungstherapie gemäß aktuell gültiger Richtlinien geplant und bei 69 % der Patientinnen angewendet, die TAC erhielten und bei 72 % der Patientinnen, die FAC erhielten.

Es wurde eine Interimsanalyse durchgeführt mit einer mittleren Nachbehandlungsdauer von 96 Monaten. Für den TAC-Arm wurde im Vergleich zu dem FAC-Arm ein signifikant längeres krankheitsfreies Überleben gezeigt. Die Wahrscheinlichkeit eines Rückfalls innerhalb von 5 Jahren war bei mit TAC behandelten Patientinnen geringer als bei den mit FAC behandelten Patientinnen (26 % gegenüber 32 %), was eine absolute Risikoreduktion von 7 % (p=0,001) bedeutete. Auch die Gesamtüberlebenszeit nach 5 Jahren war im TAC-Arm signifikant länger als im FAC-Arm (67 % gegenüber 61 %), was eine absolute Reduktion des Todesrisikos von 6 % (p=0,008) bedeutete. Die mit TAC behandelte Patientinnengruppe wurde gemäß prospektiv definierter Hauptprognostikfaktoren analysiert. Siehe Tabelle oben.

Die vorläufige Wirkung von TAC konnte bei Patientinnen mit 4 und mehr positiven Knoten (7 % der Population) zum Zeitpunkt der Interimsanalyse nicht gezeigt werden.

Die Wirkung scheint weniger ausgeprägt zu sein als bei Patientinnen mit 1–3 positiven Knoten. Das Nutzen-Risiko-Verhältnis konnte zu diesem Zeitpunkt bei Patientinnen mit 4 und mehr positiven Knoten nicht vollständig ausgewertet werden.

**TAXOTERE als Monotherapie**

Es wurden zwei randomisierte Phase-III-Vergleichsstudien mit Docetaxel bei der empfohlenen Dosierung von 100 mg/m<sup>2</sup> alle 3 Wochen durchgeführt. Insgesamt umfassten diese Studien 326 Brustkrebspatientinnen, bei denen eine Therapie mit Akyranen versagte, und 392 Brustkrebspatientinnen, bei denen eine Therapie mit Anthrazyclinen versagte.

Bei Patientinnen, bei denen eine Therapie mit Akyranen versagte, wurde Docetaxel mit Doxorubicin (75 mg/m<sup>2</sup> alle 3 Wochen) verglichen. Docetaxel erhöhte die Response rate (52 % gegenüber 37 %, p=0,01) und verkürzte die Zeit bis zum Einsetzen der Wirkung (12 Wochen gegenüber 23 Wochen, p=0,007) ohne Beeinträchtigung der Ge-





# TAXOTERE 80 mg

sanofi **aventis**

sanofi-Überlebenszeit (Docetaxel 15 Monate gegenüber Doxorubicin 14 Monate,  $p=0,38$ ) oder der Zeit bis zum Fortschreiten der Erkrankung (Docetaxel 27 Wochen gegenüber Doxorubicin 23 Wochen,  $p=0,54$ ). Drei Patientinnen (2 %), die mit Docetaxel behandelt wurden, unterbrachen die Behandlung aufgrund von Flüssigkeitsretentionen, während 15 Patientinnen (9 %), die mit Doxorubicin behandelt wurden, die Behandlung wegen Kardiotoxizität unterbrachen (3 Fälle von dekompensierter Herzinsuffizienz mit tödlichem Ausgang).

Bei Patientinnen, bei denen eine Therapie mit Anthracyclinen versagte, wurde Docetaxel mit einer Kombination von Mitomycin C und Vinblastin (12 mg/m<sup>2</sup> alle 6 Wochen und 6 mg/m<sup>2</sup> alle 3 Wochen) verglichen. Docetaxel erhöhte die Response rate (33 % gegenüber 12 %,  $p<0,0001$ ), verlängerte die Zeit bis zum Fortschreiten der Erkrankung (19 Wochen gegenüber 11 Wochen,  $p=0,0004$ ) und verlängerte die Gesamtüberlebenszeit (11 Monate gegenüber 9 Monaten,  $p=0,01$ ).

Das Sicherheitsprofil von Docetaxel entspricht während dieser Phase-II-Studien dem Sicherheitsprofil, das in Phase-I-Studien (siehe auch Abschnitt 4.8) beobachtet wurde.

### TAXOTERE in Kombination mit Doxorubicin

Eine große randomisierte Phase-II-Studie, mit 429 vorher unbehandelten Patientinnen mit metastasiertem Brustkrebs, wurde mit Doxorubicin (60 mg/m<sup>2</sup>) in Kombination mit Docetaxel (75 mg/m<sup>2</sup>) (AT-Arm) gegen Doxorubicin (60 mg/m<sup>2</sup>) in Kombination mit Cyclophosphamid (600 mg/m<sup>2</sup>) (AC-Arm) durchgeführt. Beide Dosierungsschemata wurden alle drei Wochen, jeweils am 1. Tag verabreicht.

- Die Zeit bis zur Progression (TTP) war im AT-Arm signifikant länger als im AC-Arm,  $p=0,0138$ . Die mediane TTP betrug 37,3 Wochen (95 % CI: 33,4–42,1) im AT-Arm und 31,9 Wochen (95 % CI: 27,4–36,0) im AC-Arm.
- Die Gesamt-Response rate (ORR) war gegenüber dem AC-Arm im AT-Arm signifikant erhöht,  $p=0,009$ . Die ORR betrug 59,3 % (95 % CI: 52,8–65,9) im AT-Arm und 46,5 % (95 % CI: 39,8–53,2) im AC-Arm.

In dieser Studie wurde im AT-Arm ein häufigeres Auftreten von schwerer Neutropenie (90 % gegenüber 68,6 %), Neutropenie mit Fieber (33,3 % gegenüber 10 %), Infektionen (9 % gegenüber 2,4 %), Diarrhö (7,5 % gegenüber 1,4 %), Asthenie (8,5 % gegenüber 2,4 %) und Schmerzen (2,8 % gegenüber 0 %) als im AC-Arm beobachtet. Andererseits wurde im AC-Arm häufiger eine schwere Anämie (15,8 % gegenüber 8,5 %) als im AT-Arm beobachtet. Darüber hinaus zeigte sich im AC-Arm häufiger eine schwere Kardiotoxizität wie dekompensierte Herzinsuffizienz (9,9 % gegenüber 2,9 %). Reduzierung der absoluten linksventrikulären Ausrufweite (LVEF) um mehr als 20 % (10,1 % gegenüber 6,1 %) bzw. um mehr als 30 % (6,2 % gegenüber 1,1 %). Der Tod trat bei 1 Patientin im AT-Arm (dekompensier-

te Herzinsuffizienz) und bei 4 Patientinnen im AC-Arm ein (einmal aufgrund eines septischen Schocks und dreimal wegen dekompensierter Herzinsuffizienz). In beiden Behandlungsarmen war die Lebensqualität, kontrolliert anhand des EORTC-Fragebogens, vergleichbar und veränderte sich während der Behandlung und der Nachbeobachtung nicht.

### TAXOTERE in Kombination mit Trastuzumab

TAXOTERE in Kombination mit Trastuzumab wurde zur Behandlung von Patientinnen mit metastasiertem Mammakarzinom eingesetzt, deren Tumoren HER2 überexprimierten und die vorher noch keine Chemotherapie für ihre metastasierte Erkrankung erhalten hatten.

196 Patientinnen wurden randomisiert und erhielten entweder TAXOTERE (100 mg/m<sup>2</sup>) in Kombination mit Trastuzumab oder als Monotherapie. 60 % der Patientinnen hatten zuvor bereits eine Anthracyclin-basierte adjuvante Chemotherapie erhalten. TAXOTERE plus Trastuzumab war wirksam bei Patientinnen unabhängig davon, ob sie vorher Anthracycline adjuvant erhalten hatten. Die Immunohistochemie wurde häufigste Testmethode zur Ermittlung einer HER2-Überexpression (IHC) in dieser pivotalen Studie. Eine kleine Anzahl der Patientinnen wurde mittels Fluoreszenz-in-situ-Hybridisierung (FISH) getestet. In dieser Studie hatten 87 % der teilnehmenden Patientinnen eine Erkrankung, die IHC 3+ war und 95 % der teilnehmenden Patientinnen hatten eine Erkrankung mit IHC 3+ und/oder FISH-positiv. Die Daten zur Wirksamkeit sind in der folgenden Tabelle zusammengefasst.

| Parameter                                 | TAXOTERE plus Trastuzumab <sup>1</sup><br>n=92 | TAXOTERE <sup>1</sup><br>n=94 |
|-------------------------------------------|------------------------------------------------|-------------------------------|
| Ansprechrate (95 % CI)                    | 61 % (50–71)                                   | 34 % (25–43)                  |
| Mediane Ansprechzeit (Monate) (95 % CI)   | 11,4 (9,2–15,0)                                | 6,1 (4,4–8,2)                 |
| Mediane TTP (Monate) (95 % CI)            | 10,6 (7,6–12,9)                                | 6,7 (5,0–8,9)                 |
| Mediane Überlebenszeit (Monate) (95 % CI) | 30,9 (26,8–nb.)                                | 22,9 (17,6–28,9)              |

TTP= time to progression (Zeitspanne bis zur Progression); „nb.“ bedeutet, dass der Wert nicht bestimmt werden konnte oder noch nicht erreicht war.

<sup>1</sup> Gesamtpopulation (Intention-to-treat)

<sup>2</sup> geschätzte mediane Überlebenszeit

### TAXOTERE in Kombination mit Capecitabine

Die Daten einer multizentrischen, randomisierten, kontrollierten Phase-II-Studie stützen den Einsatz von Docetaxel in Kombination mit Capecitabine bei der Behandlung von Patientinnen mit lokal fortgeschrittenem oder metastasiertem Mammakarzinom

nach Versagen einer zytoxischen Chemotherapie, die ein Anthracyclin beinhalten. In dieser Studie wurden 256 Patientinnen randomisiert einer Behandlung mit Docetaxel (75 mg/m<sup>2</sup> als einständige intravenöse Infusion alle 3 Wochen) plus Capecitabine (1250 mg/m<sup>2</sup> zweimal täglich über 2 Wochen, gefolgt von einer einwöchigen Therapiepause) zugeteilt. 256 Patientinnen wurden randomisiert einer Behandlung mit Docetaxel allein (100 mg/m<sup>2</sup> als einständige intravenöse Infusion alle 3 Wochen) zugeteilt. Die Überlebensrate war im Studienarm mit der Docetaxel-Capecitabine-Kombination höher ( $p=0,0126$ ). Die mediane Überlebensdauer betrug 442 Tage (Docetaxel + Capecitabine) gegenüber 352 Tagen (Docetaxel allein). Die objektive Gesamtsansprechrate in der gesamten randomisierten Population (Bewertung des Untersuchungsleiters) betrug 41,6 % (Docetaxel + Capecitabine) gegenüber 29,7 % (Docetaxel allein);  $p=0,0058$ . Die Zeit bis zum Fortschreiten der Erkrankung war im Studienarm mit der Docetaxel-Capecitabine-Kombination länger ( $p<0,0001$ ). Die mittlere Zeit bis zum Fortschreiten der Erkrankung betrug 106 Tage (Docetaxel + Capecitabine) gegenüber 128 Tagen (Docetaxel allein).

### Nicht-kleinzelliger Lungenkrebs

#### Patienten mit vorheriger Chemotherapie mit oder ohne Strahlentherapie

In einer Phase-II-Studie an vorherbehandelten Patienten war die Zeit bis zur Progression (12,3 Wochen gegenüber 7 Wochen) und die Gesamtüberlebensrate für Docetaxel in einer Dosierung von 75 mg/m<sup>2</sup> im Vergleich zur supportiven Behandlung signifikant verlängert. Auch die 1-Jahresüberlebensrate war für Docetaxel (40 %) im Vergleich zur supportiven Behandlung (16 %) verlängert. Der Bedarf an morphinhaltigen Schmerzmitteln ( $p<0,01$ ), nicht morphinhaltigen Schmerzmitteln ( $p<0,01$ ), anderen krankheitsbedingten Medikamenten ( $p=0,09$ ) und Strahlentherapie ( $p<0,01$ ) war bei Patienten mit Docetaxel-Therapie in einer Dosierung von 75 mg/m<sup>2</sup> im Vergleich zur supportiven Behandlung geringer. In der Gruppe der auswertbaren Patienten betrug die Response rate 6,8 % und der mediane Zeitraum bis zum Fortschreiten der Erkrankung 26,1 Wochen.

#### TAXOTERE in Kombination mit platinhaltigen Agenzien bei nicht-chemotherapeutisch vorherbehandelten Patienten

In einer Phase-II-Studie wurden 1218 Patientinnen mit nicht-reszektiertem NSCLC im Stadium IIIb oder IV und einem Karnofsky-Index von 70 % oder höher, die vorher keine Chemotherapie erhalten hatten, randomisiert, sie erhielten entweder alle drei Wochen 75 mg/m<sup>2</sup> TAXOTERE (T) als einständige i.v.-Infusion gefolgt von 75 mg/m<sup>2</sup> Cisplatin (Cis) über 30–60 Minuten, alle drei Wochen 75 mg/m<sup>2</sup> TAXOTERE als einständige i.v.-Infusion in Kombination mit Carboplatin (Cb) (AUC 6 mg/ml-min) über 30–60 Minuten, oder am Tag 1, 8, 15, 22 eines 4-wöchentlichen Zyklus 25 mg/m<sup>2</sup> Vinorelbine (V) über 6–10 Minuten gefolgt von 100 mg/m<sup>2</sup> Cisplatin am Tag 1.



In der folgenden Tabelle sind die Überlebensraten, die mittlere Zeit bis zum Fortschreiten der Erkrankung und die Response-Rate für zwei Studien-Arme aufgeführt; siehe Tabelle unten

Sekundäre Endpunkte schlossen Schmerzänderung, Bewertung der Lebensqualität mit EuroQoL 5D, Skalierung der Bronchialkarzinom-assoziierten Symptome und Änderung des „Karnofsky Performance Status“ ein. Die Ergebnisse dieser Endpunkte stützen die Resultate der primären Endpunkte.

Für die TAXOTERE-Carboplatin-Kombination konnte im Vergleich zum Referenzarm VCis Equivalenz und Nichtinferiorität nicht nachgewiesen werden.

**Prostatakarzinom**

Die Sicherheit und Wirksamkeit von TAXOTERE in Kombination mit Prednison/Prednisolon wurde in einer randomisierten, multi-zentrischen Phase-II-Studie bei Patienten mit hormonrefraktärem metastasierendem Prostatakarzinom ermittelt. Insgesamt wurden 1005 Patienten mit KPS  $\geq 60$  randomisiert und dabei einer der folgenden Behandlungsgruppen zugeordnet:

- TAXOTERE 75 mg/m<sup>2</sup> alle 3 Wochen über 10 Zyklen
- TAXOTERE 30 mg/m<sup>2</sup> wöchentlich während der ersten 5 Wochen von 6 Zyklen à 6 Wochen
- Mitoxantron 12 mg/m<sup>2</sup> alle 3 Wochen über 10 Zyklen

Bei allen 3 Dosierungsregimes wurden kontinuierlich 5 mg Prednison oder Prednisolon zweimal täglich als Begleitmedikation verabreicht.

Patienten, die Doxetaxel alle drei Wochen erhielten, zeigten eine signifikant längere Gesamtüberlebenszeit gegenüber den Patienten, die mit Mitoxantron behandelt wurden. Der Anstieg der Überlebenszeit, der im Doxetaxel-Arm bei wöchentlicher Gabe gesehen wurde, war nicht statistisch signifikant im Vergleich zu dem Anstieg im Mitoxantron-Kontrollarm. Endpunkte für die klinische Wirksamkeit im TAXOTERE-Arm im Vergleich zu dem Kontrollarm sind in der oben stehenden Tabelle zusammengefasst.

Vor dem Hintergrund der Tatsache, dass TAXOTERE bei wöchentlicher Gabe ein etwas besseres Sicherheitsprofil zeigte als

| Endpunkt                          | TAXOTERE alle 3 Wochen | TAXOTERE wöchentlich | Mitoxantron alle 3 Wochen |
|-----------------------------------|------------------------|----------------------|---------------------------|
| Zahl der Patienten                | 335                    | 334                  | 337                       |
| Mittlere Überlebensdauer (Monate) | 18,9<br>(17,0–21,2)    | 17,4<br>(16,7–19,0)  | 16,5<br>(14,4–18,6)       |
| Hazard Ratio                      | 0,761                  | 0,912                | —                         |
| 95 % CI                           | (0,619–0,936)          | (0,747–1,113)        | —                         |
| p-Wert*                           | 0,0094                 | 0,024                | —                         |
| Zahl der Patienten                | 291                    | 282                  | 300                       |
| PSA** Ansprechrate (%)            | 46,4<br>(39,5–51,3)    | 47,9<br>(41,9–53,8)  | 31,7<br>(26,4–37,3)       |
| 95 % CI                           | —                      | —                    | —                         |
| p-Wert*                           | 0,0005                 | <0,0001              | —                         |
| Zahl der Patienten                | 163                    | 164                  | 167                       |
| Ansprechrate Schmerzen (%)        | 34,6<br>(27,1–42,7)    | 31,2<br>(24,0–38,1)  | 21,7<br>(16,5–26,9)       |
| 95 % CI                           | —                      | —                    | —                         |
| p-Wert*                           | 0,0107                 | 0,0798               | —                         |
| Zahl der Patienten                | 141                    | 134                  | 137                       |
| Ansprechrate Tumor (%)            | 12,1<br>(7,2–16,6)     | 8,2<br>(4,2–14,2)    | 6,6<br>(3,0–12,1)         |
| 95 % CI                           | —                      | —                    | —                         |
| p-Wert*                           | 0,1112                 | 0,0863               | —                         |

\* Stratifizierter log rank test  
\* Schwelle für statistische Signifikanz = 0,0175  
\*\* PSA: Prostata Spezifisches Antigen

bei Gabe alle 3 Wochen, ist es möglich, dass bestimmte Patienten von der wöchentlichen Gabe einen Nutzen haben.

Bezüglich der Lebensqualität wurden keine statistisch signifikanten Unterschiede zwischen den Behandlungsgruppen beobachtet.

**5.2 Pharmakokinetische Eigenschaften**

Die Pharmakokinetik von Doxetaxel wurde bei Krebspatienten nach Gabe von 20–116 mg/m<sup>2</sup> in Phase-I-Studien ermittelt. Das kinetische Profil von Doxetaxel ist dosisunabhängig. Der Verlauf der Plasmaspiegel folgt einer dreiphasigen Kinetik mit folgenden Halbwertszeiten:  $t_{1/2\alpha}$ =4 Min,  $t_{1/2\beta}$ =36 Min und  $t_{1/2\gamma}$ =11,1 Stunden. Bei einer Gabe von 100 mg/m<sup>2</sup> als einstufige i.v.-Injektion beträgt der C<sub>max</sub>-Wert 3,7 µg/ml und die AUC 46 µg/mh. Der anfänglich starke Abbau resultiert aus der Verteilung in periphere Bereiche und die späte Phase kommt teilweise durch den relativ langsamen Rückfluss aus den peripheren Bereichen zustande. Die Gesamtkörperclearance beträgt 21 l/h/m<sup>2</sup> und das Verteilungsvolumen im steady-state 113 Liter. Die interindividuellen

Schwankungen der Gesamtkörperclearance betragen ca. 50 %. Doxetaxel ist zu mehr als 96 % an Plasmaproteine gebunden.

Bei drei Krebspatienten wurde eine Studie mit <sup>14</sup>C-markiertem Doxetaxel durchgeführt. Doxetaxel wurde nach Cytochrom-P450-vermittelter oxidativer Metabolisierung der Tertärbutoylester-Gruppe innerhalb von sieben Tagen sowohl im Urin als auch in Fäeces ausgeschieden, wobei 6 % der verabreichten Radioaktivität im Urin und 76 % in Fäeces freigesetzt wurden. 80 % der in Fäeces gefundenen Radioaktivität tritt in den ersten 48 Stunden in Form eines inaktiven Haupt- und dreier inaktiver Nebenmetaboliten und nur einer kleinen Menge unveränderter Substanz auf.

Eine Auswertung der pharmakokinetischen Daten von 577 Patienten zeigte kaum Unterschiede zu den aus Phase-I-Studien bekannten Ergebnissen. Die Pharmakokinetik von Doxetaxel wird vom Alter oder Geschlecht der Patienten nicht beeinflusst. Bei einer geringen Anzahl Patienten (n=23) mit Laborwerten, die eine leichte bis moderate Leberfunktionsstörung vermuten lassen (ALT, AST  $\geq 1,5$ fache der oberen Normalwerte, alkalische Phosphatase  $\geq 2,5$ fache der oberen Normalwerte), ist die Clearance um ca. 27 % erniedrigt (siehe auch Abschnitt 4.2). Bei Patienten mit leichter oder moderater Flüssigkeitsretention ist die Clearance von Doxetaxel unverändert. Für Patienten mit starken Flüssigkeitseinlagerungen liegen keine Daten vor.

In der Kombination beeinflusst Doxetaxel die Clearance von Doxorubicin und den Plasmaspiegel von Doxorubicin (einem Metaboliten von Doxorubicin) nicht. Die Pharmakokinetik von Doxetaxel, Doxorubicin und Cyclophosphamid wurde nicht beeinflusst durch deren gleichzeitige Gabe. Phase-I-Studien, die die Auswirkungen von Capecitabine auf die Pharmakokinetik von Doxetaxel und umgekehrt untersuchten, zeigten keinen Effekt von Capecitabine auf

|                                                                                | TCis<br>n=403 | VCis<br>n=404 | Statistische Auswertung                           |
|--------------------------------------------------------------------------------|---------------|---------------|---------------------------------------------------|
| Gesamtüberlebensrate (primärer Endpunkt):<br>mittlere Überlebensdauer (Monate) | 11,3          | 10,1          | Hazard Ratio: 1,122<br>(97,2 % CI: 0,937; 1,342)* |
| 1-Jahres-Überlebensrate (%)                                                    | 46            | 41            | Differenz: 5,4 %<br>(95 % CI: -1,1; 12,0)         |
| 2-Jahres-Überlebensrate (%)                                                    | 21            | 14            | Differenz: 6,2 %<br>(95 % CI: 0,2; 12,3)          |
| mittlere Zeit bis zur Progression (Wochen)                                     | 22,0          | 23,0          | Hazard Ratio: 1,032<br>(95 % CI: 0,876; 1,216)    |
| Gesamt-Ansprechrate (%)                                                        | 31,6          | 24,5          | Differenz: 7,1 %<br>(95 % CI: 0,7; 13,6)          |

\* korrigiert für multiple Vergleiche und adjustiert für die Stratifikationsfaktoren (Erkrankungsstadium, Behandlungsarm), basierend auf der auswertbaren Patienterpopulation.

Januar 2005

7475-1889 – TAXOTERE 80 mg – n

9



**TAXOTERE 80 mg**

Gruppe  
**sanofi aventis**

die Pharmakokinetik von Docetaxel ( $C_{max}$  und AUC) und keinen Effekt von Docetaxel auf die Pharmakokinetik des Hauptmetaboliten von Capecitabine (DFUR).

Die Clearance von Docetaxel in der Kombinationstherapie mit Cisplatin war ähnlich der nach Monotherapie. Das pharmakokinetische Profil von kurz nach einer TAXOTERE-Infusion gegebenem Cisplatin ist ähnlich dem von Cisplatin allein.

Der Einfluss von Prednison auf die Pharmakokinetik von Docetaxel mit Standard Dexamethason Prämedikation wurde bei 42 Patienten untersucht. Es wurde kein Einfluss von Prednison auf die Pharmakokinetik von Docetaxel beobachtet.

**5.3 Präklinische Daten zur Sicherheit**

Das karcinogene Potential von Docetaxel wurde nicht untersucht.

Docetaxel wirkt *in vitro* mutagen beim Test auf Chromosomenveränderungen bei CHO-K1-Zellen und *in vivo* beim Mikonucleustest der Maus. Es erzeugt jedoch keine Mutagenität beim Ames Test oder beim CHO/HGPRT-Genmutationsassay. Diese Ergebnisse stimmen mit der pharmakologischen Aktivität von Docetaxel überein.

Bei Untersuchungen mit Nagetieren wurden ungünstige Effekte auf die Hoden beobachtet, die einen negativen Einfluss von Docetaxel auf die männliche Fertilität vermuten lassen.

**6. PHARMAZEUTISCHE ANGABEN****6.1 Hilfsstoffe**

TAXOTERE Durchstechflasche:  
Polysorbat 80.

Lösungsmittel-Durchstechflasche:  
Ethanol in Wasser für Injektionszwecke.

**6.2 Inkompatibilitäten**

Keine bekannt

**6.3 Dauer der Haltbarkeit**

TAXOTERE Durchstechflaschen: 36 Monate Basislösung: Die Basislösung enthält 10 mg/ml Docetaxel und muss sofort für die Zubereitung der Infusionslösung eingesetzt werden, obwohl die chemisch-physikalische Prüfung eine Stabilität der Basislösung über einen Zeitraum von 8 Stunden bei Aufbewahrung zwischen +2°C und +8°C oder bei Raumtemperatur ergeben hat.

Infusionslösung: Die Infusionslösung sollte innerhalb von 4 Stunden bei Raumtemperatur verwendet werden.

**6.4 Besondere Lagerungshinweise**

Die Durchstechflaschen sollten zwischen +2°C und +25°C unter Schutz vor hellem Licht aufbewahrt werden.

**6.5 Art und Inhalt des Behältnisses**

Jede Blisterpackung TAXOTERE 80 mg Konzentrat und Lösungsmittel zur Herstellung einer Infusionslösung enthält:

- eine Durchstechflasche TAXOTERE zur Einmalentnahme und
- eine Durchstechflasche Lösungsmittel für TAXOTERE zur Einmalentnahme.

**Durchstechflasche des TAXOTERE-80-mg-Konzentrates zur Herstellung einer Infusionslösung:**

Die Durchstechflasche des TAXOTERE-80-mg-Konzentrates zur Herstellung einer Infusionslösung ist eine durchsichtige 15-ml-Glasflasche mit einem roten lip-05-Verschluss.

Diese Durchstechflasche enthält 2 ml einer 40 mg/ml Lösung von Docetaxel in Polysorbat 80 (Füllvolumen: 94,4 mg/2,36 ml). Dieses Füllvolumen wurde während der Entwicklung von TAXOTERE festgelegt, um einen Flüssigkeitsverlust bei der Herstellung der Basislösung durch Schaumbildung, Haften an der Glasbehälterwand und „leeres Volumen“ auszugleichen zu können. Diese Mehrfüllung gewährleistet, dass nach der Verdünnung mit dem gesamten Inhalt des beigefügten Lösungsmittels der TAXOTERE-Durchstechflaschen ein Minimum an erhaltbarem Volumen der Basislösung von 8 ml vorhanden ist, das 10 mg/ml Docetaxel enthält und so mit dem ausgemessenen Gehalt von 80 mg je Durchstechflasche entspricht.

**Durchstechflasche des Lösungsmittels:**

Die Lösungsmittel-Durchstechflasche ist eine durchsichtige 15-ml-Glasflasche mit einem transparenten, farblosen lip-05-Verschluss.

Die Lösungsmittel-Durchstechflasche enthält 6 ml einer Lösung von 13 Gew.-% Ethanol in Wasser für Injektionszwecke (Füllvolumen: 7,33 ml). Das Hinzufügen des gesamten Inhalts der Lösungsmittel-Durchstechflasche zu dem Inhalt der Durchstechflasche des TAXOTERE-80-mg-Konzentrates zur Herstellung einer Infusionslösung gewährleistet eine Konzentration von 10 mg/ml Docetaxel in der Basislösung.

**6.5 Hinweise für die Handhabung und Entsorgung****Empfehlungen zur Sicherheit bei der Anwendung**

Bei der Zubereitung der TAXOTERE-Lösungen sollten die beim Umgang mit Zytostatika erforderlichen Vorsichtsmaßnahmen getroffen werden. Das Tragen von Schutzhandschuhen wird empfohlen.

Bei Kontaminationen der Haut mit dem Infusionslösungskonzentrat, der Basislösung oder der fertigen Infusionslösung muss umgehend mit Seife und Wasser gründlich gereinigt werden. Nach Schleimhautkontakten sofort mit viel Wasser spülen.

**Zubereitung der Infusionslösung****a) Zubereitung der TAXOTERE-Basislösung (10 mg Docetaxel/ml)**

Falls die Durchstechflaschen im Kühlschrank aufbewahrt wurden, so lassen Sie die erforderliche Anzahl der TAXOTERE-Packungen für 5 Minuten bei Raumtemperatur stehen.

Entnehmen Sie aseptisch den gesamten Inhalt des Lösungsmittels für TAXOTERE-Durchstechflaschen mit einer Spritze und Nadel, indem Sie die Flasche schief halten.

injizieren Sie den gesamten Inhalt der Spritze in die zugehörige TAXOTERE-Durchstechflasche.

Entfernen Sie Spritze und Nadel und mischen Sie mindestens 45 Sekunden lang durch vorsichtiges Hin- und her-Kippen mit der Hand. Schützen Sie die Lösung nicht.

Lassen Sie die Durchstechflasche mit der Basislösung 5 Minuten bei Raumtemperatur stehen und prüfen Sie dann, ob die Lösung homogen und klar ist (Schaumbildung ist auch nach 5 Minuten normal und auf das Polysorbat 80 in der Zusammensetzung zurückzuführen).

Die Basislösung enthält 10 mg/ml Docetaxel und muss sofort für die Zubereitung der Infusionslösung eingesetzt werden, obwohl die chemisch-physikalische Prüfung eine Stabilität der Basislösung über einen Zeitraum von 8 Stunden bei Aufbewahrung zwischen +2°C und +8°C oder bei Raumtemperatur ergeben hat.

**b) Zubereitung der fertigen Infusionslösung**

Um die erforderliche Dosis für den Patienten zu erhalten, können mehrere Durchstechflaschen mit Basislösung nötig sein. Basierend auf der erforderlichen Dosis für den Patienten (ausgedrückt in mg), entnehmen Sie aseptisch mit einer graduierten Spritze mit Nadel das benötigte Volumen an Basislösung (diese enthält 10 mg/ml Docetaxel) aus der entsprechenden Anzahl von Basislösung-Durchstechflaschen. Bei einer Dosis von 140 mg Docetaxel benötigen Sie beispielsweise 14 ml Docetaxel-Basislösung.

injizieren Sie das erforderliche Volumen an Basislösung in einen 250-ml-Infusionsbeutel oder eine Infusionsflasche, welche(s) eine 5-prozentige Glukose- oder eine 0,9-prozentige Natriumchlorid-Lösung enthält.

Falls eine größere Dosis als 200 mg Docetaxel benötigt wird, ist ein größeres Volumen an Infusionsmedium zu verwenden, so dass eine Konzentration von 0,74 mg/ml Docetaxel nicht überschritten wird.

Mischen Sie den Inhalt des Infusionsbeutels, bzw. der Infusionsflasche, per Hand durch Hin- und her-Kippen.

Die TAXOTERE-Infusionslösung sollte innerhalb von 4 Stunden verwendet und als eineinzigige Infusion bei Raumtemperatur unter normalen Lichtverhältnissen aseptisch verabreicht werden.

Wie bei allen parenteral zu verabreichenden Produkten, sollten die TAXOTERE-Basislösung und die Infusionslösung vor Gebrauch visuell überprüft werden. Lösungen, die einen Niederschlag enthalten, sollten verworfen werden.

**Entsorgung**

Alle für den Lösungsvorgang und für die Anwendung verwendeten Materialien sollten üblichen Standards entsprechend entsorgt werden.



**7. PHARMAZEUTISCHER UNTERNEHMER**

Aventis Pharma S.A.  
20 avenue Raymond Aron  
92185 Antony Cedex  
Frankreich

**8. ZULASSUNGSNUMMER (M)**

EU/1/95/032/002

**9. DATUM DER ZULASSUNG/  
VERLÄNGERUNG DER ZULASSUNG**

27. November 1995

**10. STAND DER INFORMATION**

Januar 2005

Januar 2005

7475-1889 -- TAXOTERE 80 mg - n

Zentrale Anforderung an:

BPI Service GmbH

Fachinfo-Service

Postfach 12 55

88332 Aulendorf

11





## 8.11.2 Gemcitabine

### Zusammenfassung der Produktmerkmale/Fachinformation

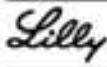

**GEMZAR®**

#### 1. Bezeichnung der Arzneimittel

GEMZAR® 200 mg Pulver zur Herstellung einer Infusionslösung  
GEMZAR® 1 g Pulver zur Herstellung einer Infusionslösung  
Wirkstoff: Gemcitabinehydrochlorid

#### 2. Qualitative und quantitative Zusammensetzung

Eine Durchstechflasche enthält 200 mg Gemcitabinehydrochlorid, entsprechend 200 mg Gemcitabin.  
Eine Durchstechflasche enthält 1.000 mg Gemcitabinehydrochlorid, entsprechend 1 g Gemcitabin.  
Hilfsstoffe siehe unter 6.1 „Hilfsstoffe“

#### 3. Darreichungsform

Pulver zur Herstellung einer Infusionslösung  
GEMZAR® ist ein weißes bis weißliches Pulver. Die zubereitete Lösung ist eine klare, farblose bis leicht trübliche Flüssigkeit.

#### 4. Klinische Angaben

##### 4.1 Anwendungsgebiete

Lokal fortgeschrittenes oder metastasiertes Blasenkarzinom in Kombination mit anderen Zytostatika  
Lokal fortgeschrittenes oder metastasiertes nichtkleinzelliges Bronchialkarzinom in Kombination mit anderen Zytostatika  
Lokal fortgeschrittenes oder metastasiertes Adrenokarzinom des Pankreas bei Patienten mit gutem Allgemeinzustand und ausreichender Knochenmarksfunktion  
Lokal fortgeschrittenes oder metastasiertes Brustkrebs in Kombination mit Paclitaxel bei Patientinnen, bei denen es nach einer (neo-)adjuvanten Chemotherapie zu einem Residiv kam. Die vorausgegangene Chemotherapie sollte ein Anthracyclin enthalten haben, sofern dieses nicht klinisch kontraindiziert war.  
Lokal fortgeschrittenes oder metastasiertes epitheliales Ovarialkarzinom in Kombination mit Carboplatin bei Patientinnen mit einem Residiv nach einer radikalsten Zeit von mindestens 6 Monaten nach einer erstmaligen zytostatischen Therapie auf Platinebasis.

##### 4.2 Dosierung,

###### Art und Dauer der Anwendung

Die Behandlung mit GEMZAR® sollte durch einen Arzt, der große Erfahrung mit der Behandlung mit zytotoxischen Arzneimitteln hat, begonnen werden oder unter seiner Beratung erfolgen.

Blasenkarzinom (in Kombination mit Cisplatin) (70 mg/m<sup>2</sup>)

Erwachsene und ältere Patienten:  
Die empfohlene Dosis für Gemcitabin beträgt 1000 mg/m<sup>2</sup> Körperoberfläche, über einen Zeitraum von 30 Minuten intravenös. Die Dosis sollte an den Tagen 1, 8 und 15 jedes 28-tägigen Behandlungszyklus gegeben werden. Cisplatin wird in einer Dosis von 70 mg/m<sup>2</sup> Körperoberfläche am Tag 2 jedes 28-tägigen Behandlungszyklus gegeben. Dieser vierwöchige Zyklus wird anschließend wiederholt.  
Eine Dosisreduktion, abhängig von der beim Patienten auftretenden Toxizität, kann entwe-

der während eines laufenden Behandlungszyklus oder beim nächsten Behandlungszyklus erfolgen.

Brustkrebs (Anwendung als Kombination)

Erwachsene: Für die Kombination von Gemcitabin mit Paclitaxel werden eine intravenöse Infusion von Paclitaxel (175 mg/m<sup>2</sup> Körperoberfläche) über einen Zeitraum von etwa 3 Stunden am Tag 1 jedes 21-tägigen Behandlungszyklus und anschließend an den Tagen 1 und 8 eine intravenöse Infusion von Gemcitabin (1250 mg/m<sup>2</sup> Körperoberfläche) über einen Zeitraum von 30 Minuten empfohlen.

Eine Dosisreduktion, abhängig von der bei der Patientin auftretenden Toxizität, kann entweder während eines laufenden Behandlungszyklus oder beim nächsten Behandlungszyklus erfolgen.

Vor der Anwendung der Kombination von Gemcitabin und Paclitaxel sollte die Patientin eine absolute Granulozytenzahl von mindestens 1500 ( $\times 10^9/L$ ) haben.

Nichtkleinzelliges Bronchialkarzinom

In der Kombination mit Cisplatin sollte die folgende Dosierung verwendet werden: Erwachsene und ältere Patienten: In der Kombination mit Cisplatin wurde entweder ein dreiwöchiges oder ein vierwöchiges Dosierungsschema verwendet.

Während des dreiwöchigen Behandlungszyklus beträgt die empfohlene Dosis für Gemcitabin 1250 mg/m<sup>2</sup> Körperoberfläche an den Tagen 1 und 8 über einen Zeitraum von 30 Minuten intravenös intravenös. Eine Dosisreduktion, abhängig von der individuellen Verträglichkeit, kann entweder während eines laufenden Behandlungszyklus oder beim nächsten Behandlungszyklus erfolgen. Während des vierwöchigen Behandlungszyklus beträgt die empfohlene Dosis für Gemcitabin 1000 mg/m<sup>2</sup> Körperoberfläche an den Tagen 1, 8 und 15 über einen Zeitraum von 30 Minuten intravenös intravenös. Eine Dosisreduktion, abhängig von der individuellen Verträglichkeit, kann entweder während eines laufenden Behandlungszyklus oder beim nächsten Behandlungszyklus erfolgen.

Ovarialkarzinom (Anwendung in der Kombination)

Erwachsene: Für Gemcitabin in der Kombination mit Carboplatin wird eine Dosis von 1000 mg/m<sup>2</sup> Körperoberfläche an den Tagen 1 und 8 jedes 21-tägigen Behandlungszyklus empfohlen. Sie wird über einen Zeitraum von 30 Minuten intravenös intravenös. Am Tag 1 wird nach dem Gemcitabin Carboplatin gegeben, wobei eine AUC von 4,0 mg/ml-min erreicht werden sollte. Eine Dosisreduktion, abhängig von der individuellen Verträglichkeit, kann entweder während eines laufenden Behandlungszyklus oder beim nächsten Behandlungszyklus erfolgen.

Pankreaskarzinom

Erwachsene und ältere Patienten: Die empfohlene Dosis für Gemcitabin beträgt 1000 mg/m<sup>2</sup> Körperoberfläche über einen Zeitraum von 30 Minuten intravenös intravenös. Dies sollte während eines Zeitraums von sieben Wochen einmal wöchentlich wiederholt werden. Danach folgt eine Woche

Pause. In den anschließenden Behandlungszyklen sollte GEMZAR® über einen Zeitraum von 3 Wochen einmal wöchentlich gegeben werden, gefolgt von einer Woche Pause. Eine Dosisreduktion, abhängig von der individuellen Verträglichkeit, kann entweder während eines laufenden Behandlungszyklus oder beim nächsten Behandlungszyklus erfolgen.

Überwachung der Behandlung

Vor jeder Dosis muss der Patient hinsichtlich Thrombozyten-, Leukozyten- und Granulozytenzahl überwacht werden. Treten hämatologische Wirkungen auf, muss, wenn notwendig, die Dosis reduziert oder die Behandlung vorübergehend abgebrochen werden.

Reduktionen der Gemcitabin-Dosis an den Tagen 8 und/oder 15 aufgrund hämatologischer Toxizität sollten entsprechend den Richtlinien in den Tabellen 1–3 erfolgen.

Tab. 1 Anpassung der Gemcitabin-Dosis an den Tagen 8 und/oder 15 bei Blasenkarzinom, nichtkleinzelligem Bronchialkarzinom, Pankreaskarzinom

| Gesamtgranulozytenzahl ( $\times 10^9/L$ ) | Thrombozytenzahl ( $\times 10^9/L$ ) | Dosierung                     |
|--------------------------------------------|--------------------------------------|-------------------------------|
| > 1                                        | und > 100                            | 100 % der Normaldosis         |
| 0,5–1                                      | oder 50–100                          | 75 % der Normaldosis          |
| < 0,5                                      | oder < 50                            | Unterbrechung der Behandlung* |

Tab. 2 Anpassung der Gemcitabin-Dosis an Tag 8 bei Brustkrebs

| Gesamtgranulozytenzahl ( $\times 10^9/L$ ) | Thrombozytenzahl ( $\times 10^9/L$ ) | Dosierung                     |
|--------------------------------------------|--------------------------------------|-------------------------------|
| > 1,2                                      | und > 75                             | 100 % der Normaldosis         |
| 1–< 1,2                                    | oder 50–75                           | 75 % der Normaldosis          |
| 0,7–< 1                                    | und $\geq 50$                        | 50 % der Normaldosis          |
| < 0,7                                      | oder < 50                            | Unterbrechung der Behandlung* |

Tab. 3 Anpassung der Gemcitabin-Dosis an Tag 8 bei Ovarialkarzinom

| Gesamtgranulozytenzahl ( $\times 10^9/L$ ) | Thrombozytenzahl ( $\times 10^9/L$ ) | Dosierung                     |
|--------------------------------------------|--------------------------------------|-------------------------------|
| > 1,5                                      | und > 100                            | 100 % der Normaldosis         |
| 1–< 1,5                                    | oder 75–99                           | 50 % der Normaldosis          |
| < 1                                        | oder < 75                            | Unterbrechung der Behandlung* |

\* Die Behandlung kann am Tag 1 des nächsten Behandlungszyklus fortgesetzt werden.

März 2004

7900796 – GEMZAR – 1

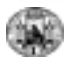

SUCCESS-Trial, Version 1.2, 15.8.2005

Page 176

Anschrift: D-80337 München • Maistraße 11 • Telefon (0 89) 51 60-4111 (Vermittlung)

Wenn die folgenden hämatologischen Toxizitäten auftreten, sollte die Dosis in den folgenden Behandlungszyklen schrittweise um eine Dosisstufe angepasst werden (siehe Tabelle 4):

- absolute Neutrophilenzahl  $<0,5 \times 10^9/l$  mehr als 5 Tage lang
- absolute Neutrophilenzahl  $<0,1 \times 10^9/l$  mehr als 3 Tage lang
- febrile Neutropenie d.h. Temperatur  $\geq 38^\circ C$ , absolute Neutrophilenzahl  $<1,0 \times 10^9/l$ , die eine Krankenhausaufnahme und ein intensives Antibiotikum erfordern
- Thrombozyten  $<25 \times 10^9/l$
- Verschieben des nächsten Behandlungszyklus um mehr als eine Woche aufgrund von Toxizität

Tab. 4 Dosisstufen für Gemcitabin und Carboplatin

| Dosisstufe  | 0                                           | -1                                         | -2                             |
|-------------|---------------------------------------------|--------------------------------------------|--------------------------------|
| Gemcitabin  | 1000 mg/m <sup>2</sup> an den Tagen 1 und 8 | 800 mg/m <sup>2</sup> an den Tagen 1 und 8 | 600 mg/m <sup>2</sup> an Tag 1 |
| Carboplatin | AUC 4,0 Tag 1                               | AUC 4,0 Tag 1                              | AUC 4,0 Tag 1                  |

Während der Behandlung mit Gemcitabin müssen die Leber- und Nierenfunktion sowie die Transaminasen (AST/ALT) und das Serumkreatinin in regelmäßigen Abständen überprüft werden, um eine nicht-hämatologische Toxizität zu entdecken. Eine Dosisreduktion, abhängig von der individuellen Verträglichkeit, kann entweder während des laufenden Behandlungszyklus oder beim nächsten Behandlungszyklus erfolgen. Die reduzierte Dosis sollte so lange gegeben werden, bis die Toxizität zurückzugehen beginnt.

Vorsichtsmaßnahmen bei der Anwendung GEMZAR® wird während der Infusion gut vertragen und kann antulant gegeben werden. Wenn es zu einem Extravasat kommt, muss im Allgemeinen die Infusion sofort gestoppt und in einem anderen Blutgefäß neu begonnen werden. Der Patient sollte nach der Infusion sorgfältig überwacht werden.

**4.3 Gegenanzeigen**

Bekanntes Überempfindlichkeits gegen Gemcitabin oder einen der Hilfsstoffe.

Da bis jetzt bei Patienten mit mäßig bis stark eingeschränkter Leberfunktion oder stark eingeschränkter Nierenfunktion (glomeruläre Filtrationsrate  $<30 ml/min$ ) keine entsprechenden Studien durchgeführt wurden, sollte GEMZAR® diesen Patienten nicht gegeben werden.

**4.4 Warnhinweise und Vorsichtsmaßnahmen für die Anwendung**

**Warnhinweise**

Eine Verlängerung der Infusionszeit und Verkürzung des Zeitabstands zwischen den Dosen erhöhen die Toxizität.

In einer klinischen Studie, in der Patienten mit nichtkleinzelligem Bronchialkarzinom gleichzeitig eine Strahlentherapie des Thorax erhielten, verursachte GEMZAR®

schwere toxische Symptome, wie schwere und möglicherweise lebensbedrohliche Ösophagitis und Pneumonitis. GEMZAR® wurde sechs Wochen lang in einer Dosierung von 1000 mg/m<sup>2</sup> gegeben bei gleichzeitiger Strahlentherapie. Patienten, die hohe Strahlendosen erhalten, waren besonders empfänglich. Die gleichzeitige Anwendung von GEMZAR® und Strahlentherapie wird daher zur Zeit nicht empfohlen.

**Vorsichtsmaßnahmen**

Gemcitabin muss bei Patienten mit leicht bis mäßig eingeschränkter Nierenfunktion und Patienten mit leicht eingeschränkter Leberfunktion mit Vorsicht angewendet werden. Bei etwa 60 % der Patienten kommt es zu einer Erhöhung der Transaminasen (AST/ALT) und der alkalischen Phosphatase. Diese Nebenwirkung ist normalerweise leicht ausgeprägt, vorübergehend, nicht fortschreitend und führt selten zu einem Abbruch der Behandlung. Bei 2,6 % der Patienten wurde eine Zunahme des Bilirubin beobachtet (WHO-Toxizitätsgrad 3 und 4). Gemcitabin sollte Patienten mit eingeschränkter Leberfunktion mit Vorsicht gegeben werden (siehe auch 4.6 „Nebenwirkungen“).

Basierend auf wenigen Daten wurde bei Patienten mit leicht bis mäßig eingeschränkter Nierenfunktion (glomeruläre Filtrationsrate 30 ml/min – 60 ml/min) keine gleichbleibende, signifikante Wirkung auf die pharmakokinetischen Eigenschaften von Gemcitabin beobachtet. Einige Fälle von Nierenversagen, einschließlich eines hämolytisch-urämisches Syndroms, wurden berichtet. Gemcitabin sollte Patienten mit eingeschränkter Nierenfunktion nur mit Vorsicht gegeben werden (siehe 4.6 „Nebenwirkungen“). Die Behandlung mit GEMZAR® sollte bei den ersten Anzeichen einer mikroangiopathischen hämolytischen Anämie abgebrochen werden, wie bei schnell abnehmenden Hämoglobinwerten mit gleichzeitiger Thrombozytopenie, Erhöhung von Serumkreatinin, Serumkreatinin, Harnstoff oder LDH. Ein Nierenversagen ist möglicherweise auch bei Absetzen der Therapie nicht reversibel und kann eine Dialyse erfordern.

Bei Patienten mit eingeschränkter Knochenmarkfunktion sollte die Behandlung mit Vorsicht begonnen werden. Wie bei anderen Behandlungen mit zytotoxischen Substanzen, muss das Risiko einer kumulativen Knochenmarkshemmung beachtet werden, wenn Gemcitabin zusammen mit anderer Chemotherapie gegeben wird. In Fertilitätsstudien hat Gemcitabin bei männlichen Mäusen Hypospermatozoospermie verursacht (siehe Abschnitt 5.3 „Präklinische Daten zur Sicherheit“). Daher wird Männern, die mit GEMZAR® behandelt werden, empfohlen während der Behandlung mit GEMZAR® und bis zu 6 Monate danach kein Kind zu zeugen und sich wegen der Möglichkeit einer Infertilität durch die Therapie mit GEMZAR® über eine Spermakonservierung beraten zu lassen.

Vor jeder Dosis muss die Thrombozyten-, Leukozyten- und die Granulozytenzahl bestimmt werden (siehe 4.2 „Dosierung, Art und Dauer der Anwendung“). Die peripheren Blutwerte können weiter absinken,

nachdem die Behandlung mit GEMZAR® beendet wurde.

Das Risiko von unerwarteten Wirkungen auf die Atemwege scheint bei Patienten mit Lungenkrebs und Lungenmetastasen größer zu sein als bei anderen Tumoren, was bei der Behandlung dieser Patientengruppe berücksichtigt werden sollte (siehe 4.6 „Nebenwirkungen“).

Bei weniger als 1 % der Patienten wurde eine interstielle Pneumonitis mit Lungenfibrosen festgestellt. In diesem Fall muss die Behandlung mit GEMZAR® abgebrochen werden. Steroide können die Symptome bessern. Schweregrade, selten tödliche, Lungenwirkungen, wie Lungenödem, interstielle Pneumonitis und akutes Atemnotsyndrom beim Erwachsenen (ARDS) wurden gelegentlich oder selten berichtet. In solchen Fällen muss der Abbruch der GEMZAR®-Behandlung in Betracht gezogen werden. Frühzeitige supportive Maßnahmen können zur Besserung der Beschwerden beitragen.

Gemcitabin wurde bei Kindern nicht untersucht.

**4.5 Wechselwirkungen mit anderen Arzneimitteln und sonstige Wechselwirkungen**

In einer klinischen Studie mit Patienten mit nichtkleinzelligem Bronchialkarzinom hat GEMZAR® in Kombination mit Strahlentherapie des Thorax zu schweren toxischen Symptomen geführt (siehe 4.4 „Warnhinweise und Vorsichtsmaßnahmen für die Anwendung“).

**4.6 Schwangerschaft und Stillzeit**

**Schwangerschaft**

In Tierversuchen sind die Fortpflanzung betreffende toxische Wirkungen aufgetreten. Während der Schwangerschaft, besonders während des ersten Trimesters, dürfen zytotoxische Arzneimittel nur bei sehr strenger Indikationsstellung und nach sorgfältiger Abwägung der Notwendigkeit für die Mutter und der Risiken für den Fötus gegeben werden.

Frauen im gebärfähigen Alter sollten Maßnahmen ergreifen, eine Schwangerschaft zu vermeiden.

**Stillzeit**

Es ist nicht bekannt, ob Gemcitabin in der Muttermilch ausgeschieden wird. Wenn eine Behandlung mit GEMZAR® während der Stillzeit unbedingt notwendig ist, muss abgestillt werden.

**4.7 Auswirkungen auf die Verkehrstüchtigkeit und das Bedienen von Maschinen**

Gemcitabin kann leichte bis mäßige Müdigkeit verursachen. Daher kann Gemcitabin, auch wenn es wie vorgesehen angewendet wird, das Reaktionsvermögen soweit beeinträchtigen, dass die Fähigkeit zum Autofahren oder Bedienen von Maschinen betroffen ist. Das gilt insbesondere im Zusammenhang mit Alkohol.

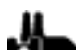

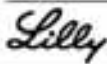

**GEMZAR®**

**4.8 Nebenwirkungen**

Zu den am häufigsten berichteten Nebenwirkungen im Zusammenhang mit einer GEMZAR®-Behandlung gehören: Übelkeit mit oder ohne Erbrechen, erhöhte Transaminasen (AST, ALT) und alkalische Phosphatasen, berichtet bei etwa 60 % der Patienten; Proteinurie und Hämaturie, berichtet bei etwa 60 % der Patienten; Anämie, berichtet bei 10–40 % der Patienten (die höchste Inzidenz bei Patienten mit Lungenkrebs); allergische Hautausschläge treten bei etwa 25 % der Patienten auf und sind bei etwa 10 % der Patienten mit Juckreiz verbunden. Die Häufigkeit und der Schweregrad der Nebenwirkungen hängen von der Dosis, der Infusionsgeschwindigkeit und dem Abstand zwischen den einzelnen Dosen ab (siehe 4.4 „Warnhinweise und Vorsichtsmaßnahmen für die Anwendung“).

Dosisbegrenzende Nebenwirkungen sind eine Abnahme der Thrombozyten-, Leukozyten- und Granulozytenzahl (siehe 4.2 „Dosierung und Art der Anwendung“).

**Systemorganklassen**

Störungen des Blut- und Lymphsystems: Häufig Leukopenie, Thrombozytopenie, Anämie (Neutropenie Grad 3 = 18,3 %; Grad 4 = 6 %). Sehr selten Thrombozytose.

Störungen des Immunsystems: Sehr selten Anaphylaktische Reaktion.

Stoffwechsel- und Ernährungsstörungen: Häufig Appetitlosigkeit.

Störungen des Nervensystems: Häufig Kopfschmerzen, Schlägigkeit, Schlaflosigkeit.

Funktionsstörungen des Herzens: Gelegentlich Lungenödem. Seltener Myokardinfarkt, Herzinsuffizienz, Arrhythmie.

Funktionsstörungen der Gefäße: Seltener Hypotonie.

Respiratorische, thorakale und mediastinale Funktionsstörungen: Sehr häufig Dyspnoe. Häufig Husten, Schragelien. Gelegentlich Bronchospasmus (siehe 4.3 „Gegenanzeigen“), interstitielle Pneumonitis (siehe 4.4 „Warnhinweise und Vorsichtsmaßnahmen für die Anwendung“). Seltener AFDIS.

Gastrointestinale Beschwerden: Sehr häufig Übelkeit, Erbrechen. Häufig Durchfall, Verstopfung.

Funktionsstörungen der Haut und des Großhautzellschleimbewebes: Sehr häufig Allergischer Hautausschlag. Häufig Ulzeration der Mundschleimhaut, Schwitzen, Juckreiz, Hämaturie. Seltener Abschuppung, Blasen- und Geschwürbildung.

Funktionsstörungen des Bewegungsapparates, des Bindegewebes und der Knochen: Häufig Muskelschmerzen, Rückenschmerzen.

Funktionsstörungen der Nieren und der ableitenden Harnwege: Sehr häufig Leichtes Proteinurie, Hämaturie. Seltener Nierenversagen, hämolytisch-urämisches Syndrom (siehe 4.4 „Warnhinweise und Vorsichtsmaßnahmen für die Anwendung“).

Allgemeine Störungen und Reaktionen an der Applikationsstelle: Sehr häufig Ödem/periphere Ödeme. Häufig Fieber, Schüttelfrost, Schwäche. In wenigen Fällen trat ein Gesichtsrödem auf.

Untersuchungen: Sehr häufig Erhöhung von Transaminasen, alkalischer Phosphatase. Häufig erhöhte Bilirubin.

Injektionen und Injektionsstellen: Sehr häufig Grippeähnliche Symptome – die häufigsten Symptome waren Fieber, Kopfschmerzen, Rückenschmerzen, Schüttelfrost, Muskelschmerzen, Schwäche und Appetitlosigkeit, Husten, Schnupfen, Schwitzen und Schlafstörungen wurden auch berichtet. Fieber und Schwäche treten auch als einzelne Symptome auf.

Häufigkeiten: Sehr häufig: > 10 %; Häufig: > 1 % und < 10 %; Gelegentlich: > 0,1 % und < 1 %; Seltener: > 0,01 % und < 0,1 %; Sehr selten: < 0,01 %.

Gemcitabin und Paclitaxel: Eine Zunahme der folgenden Grad 3 und 4 Ereignisse wurde beobachtet (Gemcitabin plus Paclitaxel vs. Paclitaxel):

Hämatologische Toxizität: Hämoglobin (G3: 5,7 % vs. 1,9 %; G4: 1,1 % vs. 0,4 %); Thrombozyten (G3: 5,3 % vs. 0 %; G4: 0,4 % vs. 0 %); Neutrophile/Granulozyten (G3: 31,3 % vs. 4,2 %; G4: 17,2 % vs. 6,6 %); Leukopenie (G3: 4,6 % vs. 1,2 %; G4: 0,4 % vs. 0 %).

Nicht-hämatologische Toxizität: Müdigkeit (G3: 5,7 % vs. 1,2 %; G4: 0,8 % vs. 0,4 %); Durchfall (G3: 3,1 % vs. 1,9 %; G4: 0 % vs. 0 %).

**Gemcitabin und Cisplatin:**

Eine Zunahme der folgenden Grad 3 und 4 Ereignisse wurde beobachtet (Gemcitabin plus Cisplatin vs. MVAC (Methotrexat, Vinorelbine, Doxorubicin und Cisplatin)).

Hämatologische Toxizität: Hämoglobin (G3: 24 % vs. 18 %; G4: 4 % vs. 2 %); Thrombozyten (G3: 29 % vs. 8 %; G4: 29 % vs. 13 %).

Nicht-hämatologische Toxizität: Übelkeit und Erbrechen (G3: 22 % vs. 18 %; G4: 0 % vs. 2 %); Durchfall (G3: 2 % vs. 8 %; G4: 0 % vs. 1 %); Infektion (G3: 2 % vs. 10 %; G4: 1 % vs. 5 %); Stomatitis (G3: 1 % vs. 15 %; G4: 0 % vs. 4 %).

**Gemcitabin und Carboplatin:**

Eine Zunahme der folgenden Grad 3 und 4 Ereignisse wurde beobachtet (Gemcitabin plus Carboplatin vs. Carboplatin):

Hämatologische Toxizität: Hämoglobin (G3: 22,3 % vs. 5,7 %; G4: 5,1 % vs. 2,3 %); Neutrophile (G3: 41,7 % vs. 10,9 %; G4: 26,6 % vs. 1,1 %); Thrombozyten (G3: 30,3 % vs. 10,3 %; G4: 4,6 % vs. 1,1 %).

Nicht-hämatologische Toxizität: Blutungen (G3: 1,6 % vs. 0 %; G4: 0 % vs. 0 %); Leukopenie (G3: 1,1 % vs. 0 %; G4: 0 % vs. 0 %); Infektion ohne Neutropenie (G3: 0,6 % vs. 0 %; G4: 0 % vs. 0 %).

**4.9 Überdosierung**

Es gibt kein Antidot gegen Gemcitabin. Einzeldosen von bis zu 5,7 g/m<sup>2</sup> Körperoberfläche wurden alle 14 Tage als intravenöse Infusion über einen Zeitraum von 30 Minuten gegeben, mit klinisch akzeptabler Toxizität. Wenn der Verdacht einer Überdosierung besteht, sollten die Blutwerte des Patienten überwacht werden und eine geeignete Behandlung, wie benötigt, begonnen werden.

**5. Pharmakologische Eigenschaften**

**5.1 Pharmakodynamische Eigenschaften**

Pharmakotherapeutische Gruppe: Pyrimidin-Analog  
ATC-Code: L01B.C05

Zytotoxische Aktivität in Zellkulturmodellen: Gemcitabin wirkt in zahlreichen Kulturen von menschlichen und murinen Tumorzellen deutlich zytotoxisch. Es wirkt zeitphasenspezifisch, wobei hauptsächlich Zellen während der DNS-Synthese (S-Phase) abgetötet werden; unter bestimmten Bedingungen wird die Zellprogression am Übergang von der G1- zur S-Phase blockiert. Die zytotoxische Wirkung von Gemcitabin in vitro ist sowohl konzentrations- als auch zeitabhängig.

Antitumor-Aktivität in präklinischen Modellen:

Die Antitumoraktivität von Gemcitabin in Tumormodellen am Tier ist abhängig von der Häufigkeit der Verabreichung. Wird Gemcitabin täglich verabreicht, ist die Letalität unter den Tieren bei relativ geringer Antitumor-Aktivität deutlich erhöht. Wenn dagegen Gemcitabin jeden dritten oder vierten Tag verabreicht wird, können Mäusen nicht-letale Dosen mit hervorragender Aktivität gegen eine Reihe von Tumoren verabreicht werden.

März 2004

7502-W76L – GEMZAR – 1

3



**PHARMACIA**

**FARMORUBICIN® CS**

**1. Bezeichnung der Arzneimittel**

FARMORUBICIN® CS 10 mg Lösung  
 FARMORUBICIN® CS 20 mg Lösung  
 FARMORUBICIN® CS 50 mg Lösung  
 FARMORUBICIN® CS 200 mg Lösung  
 Wirkstoff: Epirubicinhydrochlorid

**2. Verschreibungstatus/  
 Apothekenpflicht**

Verschreibungspflichtig

**3. Zusammensetzung der Arzneimittel**

**3.1 Stoff- oder Indikationsgruppe**

Zytostatisch wirksames Antitumorikum der Anthrazyclin-Gruppe

**3.2 Arzneilich wirksamer Bestandteil**

1 Durchstechflasche FARMORUBICIN® CS 10/20/50/200 mg Lösung mit 5/10/25/100 mg Injektionslösung enthält 10/20/50/200 mg Epirubicinhydrochlorid

**3.3 Sonstige Bestandteile**

Natriumchlorid, Salzsäure, Wasser für Injektionszwecke

**4. Anwendungsgebiete**

Mammakarzinom  
 fortgeschrittenes Ovarialkarzinom  
 kleinzelliges Bronchialkarzinom  
 fortgeschrittenes Magenkarzinom  
 fortgeschrittenes Weichteilkarzinom

**5. Gegenanzeigen**

- ausgeprägte Knochenmarkdepression (z. B. nach erfolgter Vorbehandlung mit Chemo- und/oder Strahlentherapie)
- ausgeprägte Entzündungen der Schleimhäute im Mund- und/oder Magen-Darm-Bereich
- akute Infektionen
- ausgeprägte Beeinträchtigung der Leberfunktion
- muskuläre Harnstoffkienz Grad IV (Hühneraugen)
- akuter Myokardinfarkt und abgeklammerter Myokardinfarkt, der zur muskulären Harnstoffkienz Grad II und IV gefährdet
- akute entzündliche Herzerkrankungen
- Rhythmusstörungen mit gewissem hämodynamischen Auswirkungen, auch in der Vorgeschichte
- vorausgegangene Behandlung mit Epirubicin oder anderen Anthrazyclinen bis zur maximalen kumulativen Dosis
- Überempfindlichkeit gegenüber Epirubicin, sonstigen Bestandteilen des Arzneimittels, anderen Anthrazyclinen oder Anthracyclinen
- Schwangerschaft und Stillzeit

Patienten mit anderen Stadien der angeführten Herzerkrankungen und/oder einer Vorbehandlung mit anderen Anthrazyclinen bedürfen einer individuellen therapeutischen Entscheidung, einschließlich der folgenden Verkaufsrichtlinie.

**Hinweise:**

Besondere Vorsicht ist bei Patienten mit vorangegangener, gleichzeitiger oder geplanter Radiotherapie geboten. Diese haben bei der Anwendung von Epirubicin ein erhöhtes Risiko von Lokaltoxizitäten im Bestrahlungsfeld (Fecal-Phänomen).

Eine vorausgegangene Bestrahlung des Mediastinums erhöht die Kardiotoxizität von Epirubicin.

Ein kardiales Monitoring wird empfohlen bei Epirubicin-Dosen über 400 mg/m<sup>2</sup> KOF; die maximale kumulative Dosis sollte (900-1000 mg/m<sup>2</sup> KOF) nicht überschreiten.

Vor Beginn der Behandlung mit Epirubicin sollte sich der Patient von den toxischen Auswirkungen (wie z. B. Stomatitis, Neutropenie, Thrombozytopenie und generalisierten Infektionen) einer vorausgegangenen zytotoxischen Behandlung erholt haben.

Eine Impfung mit Lebendvakzinen sollte im zeitlichen Zusammenhang mit einer Epirubicin-Therapie nicht durchgeführt werden. Der Kontakt des Patienten mit Polio-Impfungen sollte vermieden werden.

FARMORUBICIN® CS Lösung darf nicht oral, subcutan, intramuskulär oder intrathekal verabreicht werden.

**Anwendung in Schwangerschaft und Stillzeit**

Aufgrund von Ergebnissen aus Tierversuchen muß angenommen werden, daß Epirubicin erbgutschädigend, fruchttschädigend und krebstauslösend wirken kann. FARMORUBICIN® CS Lösung sollte bei bestehender Schwangerschaft nicht angewendet werden. Vor Beginn der Behandlung ist eine Schwangerschaft auszuschließen.

Frauen sollten während und bis zu 6 Monaten nach der Behandlung nicht schwanger werden. Falls nach besonderer Nutzen/Risiko-Bewertung eine Behandlung mit Epirubicin dennoch erforderlich erscheint oder während der Behandlung eine Schwangerschaft eintritt, sollte die Patientin auf mögliche Schädigungen des Kindes und die Möglichkeit einer genetischen Belastung hingewiesen werden.

Während der Behandlung mit Epirubicin darf nicht gestillt werden, da Epirubicin in die Muttermilch übergehen kann.

Männern, die mit Epirubicin behandelt werden, wird empfohlen, während der Behandlung und bis zu 6 Monaten danach kein Kind zu zeugen und sich vor Therapiebeginn wegen der Möglichkeit einer irreversiblen Infertilität durch die Therapie über eine Spermakonservierung beraten zu lassen.

**5. Nebenwirkungen**

**Blutbildendes System:**

Die Myelosuppression stellt die akute dosislimitierende Toxizität dar und tritt vor allem in Form einer dosisabhängigen, reversiblen Leukopenie und/oder Granulozytopenie (Neutropenie) auf. Thrombozytopenie und Anämie können ebenfalls auftreten. Leukopenie und Neutropenie können stark ausgeprägt sein, wobei der Nadir meist zwischen dem 10. und 14. Tag nach Verabreichung des Arzneimittels erreicht wird; dieser ist jedoch gewöhnlich vorübergehend, und die Leukozyten und neutrophilen Granulozyten erreichen meist bis zum 21. Tag wieder normale Werte.

Als Folgen einer Myelosuppression können Fieber, Infektionen, Pneumonien, Sepsis, septischer Schock, Hämorrhagien, Gewebshypoxie auftreten, die zum Tod führen können.

Bei Auftreten einer lebigen Neutropenie wird eine iv-Antibiose empfohlen.

Bei Patienten, die gleichzeitig mit Epirubicin und DNA-verändernden Zytostatika (z. B. alkylierende Substanzen, Platinoderivate) behandelt wurden, wurde im Einzelbilden das Auftreten einer sekundären Leukämie (zum Teil auch mit präleukämischer Phase) beobachtet. Dies kann auch nach einer kurzen Latenzzeit (1-3 Jahre) auftreten.

Sorgfältige Kontrollen des Blutbildes unter besonderer Berücksichtigung der Thrombozyten, Leukozyten, Granulozyten und der Erythrozyten sind vor und während jedes Behandlungszyklus erforderlich.

Folgende der o. g. Nebenwirkungen treten häufig (> 5 %) auf:  
 Myelosuppression, Leukopenie, Granulozytopenie, Neutropenie, Thrombozytopenie, Anämie, Fieber, Infektionen.

Folgende der o. g. Nebenwirkungen treten weniger häufig (< 5 %) auf:  
 Sepsis, septischer Schock, Hämorrhagien, Gewebshypoxie.

**Kardiotoxizität:**

Zwei Formen der Kardiotoxizität können auftreten:

Der **Subtyp** ist dosisunabhängig und gekennzeichnet durch Arrhythmien (supraventrikuläre und ventrikuläre Extrasystolen, Sinustachykardie, ventrikuläre Tachykardie, Bradykardie, AV-Block, Schenkelblöcke) und/oder unspezifische EKG-Veränderungen (ST-Segmente-Veränderungen, Niederholtsge und verlängerte QT-Zeit). Mit Ausnahme einer Manifestation mäßiger Rhythmusstörungen sind diese Veränderungen im allgemeinen vorübergehend und in der Regel kein Indikator für eine Entstehung einer Kardiotoxizität vom Spättyp; ihr Auftreten stellt keine Kontraindikation für die erneute Anwendung von Epirubicin dar.

Der **Spättyp** ist dosisabhängig und zeigt sich in Form einer Herzmuskelerschädigung (Kardiomypopathie), die sich durch Symptome einer dekompensierten Herzinsuffizienz manifestiert (z. B. Dyspnoe, Ödeme, Lebervergrößerung, Ascites, Lungenödem, Pleuraergüsse, Galoppfhythmus).

Klinischen Studien zufolge steigt das Risiko eines kongestiven Herzversagens stark an, wenn eine kumulative Dosis von 900-1000 mg/m<sup>2</sup> Epirubicin erreicht wird, auch wenn keine anderen kardialen Risikofaktoren vorliegen. Bei Vorliegen weiterer kardialer Risikofaktoren (z. B. akuter oder latenter Herzversagen, vorausgegangener Bestrahlung des Mediastinums oder vorausgegangener bzw. gleichzeitiger Behandlung mit kardiotoxischen Arzneimitteln) kann sich auch eine niedrigere kumulative Gesamtdosis kardiotoxisch auswirken. Schwere Herzscheidigungen können durch regelmäßige Überwachung der Herzfunktion (hauptsächlich Überwachung der LVEF) im Verlauf der Epirubicintherapie verhindert werden. Die Manifestation der späten Kardiotoxizität erfolgt meist während der Behandlung mit Epirubicin oder innerhalb von zwei bis drei Monaten nach Beendigung der Behandlung. Späte Manifestationen (mehrere Monate bis Jahre nach Beendigung) sind ausge-

November 2001

481154 - FARMORUBICIN CS - 1

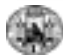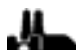

beten. Es wurden auch Perikardergüsse beobachtet.

In toxiologischen Studien zeigte Epirubicin einen besseren therapeutischen Index und niedrigere systemische und kardiale Toxizität als Doxorubicin.

Folgende der o. g. Nebenwirkungen treten häufig (> 5 %) auf:  
EKG-Veränderungen, Tachykardien, Arrhythmien.

Folgende der o. g. Nebenwirkungen treten weniger häufig (< 5 %) auf:  
Kardiomypathie, dekompensierte Herzinsuffizienz (Dyspnoe, Ödeme, Lebervergroßerung, Ascites, Lungenödem, Pleuraergüsse, Galoppfhythmus), ventrikuläre Tachykardie, Bradykardie, AV-Block, Schenkelblöcke.

Überwachung der Herzfunktion:

Die Herzfunktion muß vor der Behandlung untersucht und während der Therapie sorgfältig überwacht werden, um während der Therapie kein Risiko schwerer Schädigungen des Herzens einzugehen. Eine antihydratante Kardiomyopathie kann am besten mit einer Biopsie des Endomyokards diagnostiziert werden, jedoch eignet sich diese invasive Methode nicht für Routineuntersuchungen. Als Routineuntersuchung wird empfohlen, ein EKG aufzunehmen und die linksventrikuläre Auswurfaktion (LVEF) zu bestimmen. Veränderungen im EKG sind normalerweise Anzeichen einer vorübergehenden (reversiblen) Schädigung. Eine andauernde QRS-Niederwertigkeit, Verlängerung des systolischen Zeitintervalls über die normalen Werte hinaus und eine Abnahme der LVEF sind oft Anzeichen einer Kardiomyopathie, die durch Anthrazykline hervorgerufen wird. Eine kumulative Gesamtdosis von 900 - 1000 mg Epirubicin/m<sup>2</sup> sollte hinsichtlich des Risikos einer Kardiomyopathie nur mit größter Vorsicht überschritten werden. Beim Überschreiten einer Gesamtdosis von 900 - 1000 mg/m<sup>2</sup> steigt das Risiko eines kongestiven Herzversagens erheblich.

Gastrointestinaltoxizität:

Während der Behandlung kann eine Mucositis (v. a. Stomatitis, seltener Ösophagitis) auftreten, die sich durch Schmerzen oder brennendes Gefühl, Erytheme, Erosionen, Ulcerationen, Blutungen und Infektionen manifestiert. Stomatitis tritt meist zu Beginn der Behandlung auf und kann sich in schweren Fällen zu Ulcerationen der Mucosa entwickeln. Die meisten Patienten erholen sich jedoch von diesen Nebenwirkungen bis zur dritten Therapiewoche. Außerdem kann es zu anderen gastrointestriellen Beschwerden wie Übelkeit und Erbrechen, gelegentlich Diarrhoe, Appetitlosigkeit und Bauchschmerzen kommen. Schweres Erbrechen und Durchfall können zu Dehydratation führen. Übelkeit und Erbrechen können durch prophylaktische Gabe von Antiemetika behandelt werden. Es kann eine Hyperpigmentierung der Mundschleimhaut auftreten.

Folgende der o. g. Nebenwirkungen treten häufig (> 5 %) auf:  
Übelkeit, Erbrechen, Diarrhoe, Dehydratation, Mucositis (v. a. Stomatitis) mit Schmerzen, brennendem Gefühl, Erythemen, Erosionen, Ulcerationen, Blutungen.

Folgende der o. g. Nebenwirkungen treten weniger häufig (< 5 %) auf:  
Ösophagitis, Appetitlosigkeit, Hyperpigmentierung der Mundschleimhaut.

Haut, allergische Reaktionen:

Häufig tritt eine — gewöhnlich reversible — Alopecie auf, wobei das Haar normalerweise innerhalb von zwei bis drei Monaten nach Beendigung der Therapie nachwächst. Andere dermatologische Nebenwirkungen sind Rötungen, Hyperpigmentierung der Haut und Nägel, Lichtempfindlichkeit oder Überempfindlichkeit bei Bestrahlung („Recoil“-Phänomen), Überurikurie und anaphylaktische Reaktionen wurde berichtet. Als Symptome können Hautausschlag, Juckreiz, Fieber, Schüttelfrost und Schock auftreten.

Folgende der o. g. Nebenwirkungen treten häufig (> 5 %) auf:  
Alopecie.

Folgende der o. g. Nebenwirkungen treten weniger häufig (< 5 %) auf:  
Rötungen, Hyperpigmentierung der Haut und Nägel, Lichtempfindlichkeit oder Überempfindlichkeit bei Bestrahlung („Recoil“-Phänomen), Urikaria, anaphylaktischer Schock.

Injektionsstelle:

Rötungen entlang der Infusionsvene treten häufig auf und können einer lokalen Phlebitis oder Thrombophlebitis vorangehen. Das Risiko einer Phlebitis/Thrombophlebitis kann durch Einhaltung der im Kapitel 11 beschriebenen Verfahrensweise minimiert werden. Phlebotomie kann ebenfalls auftreten, besonders wenn FARMORUBICIN® CS Lösung in eine kleine Vene injiziert wird. Bei passiver Fehlinjektion treten lokale Schmerzen, schweres Fettgewebsentzündung und Gewebekrosen auf.

Andere Nebenwirkungen:

Schwäche, Übelkeit, Müdigkeit, Kopfschmerzen und Schwindel, Konjunktivitis und Keratitis.  
Hypertonämie kann infolge schneller Lyse von neoplastischen Zellen auftreten. Änderungen in den Ionenwasserstoffspiegeln.  
Wie bei anderen zytotoxischen Substanzen, wurde auch bei der Anwendung von Epirubicin über Thrombophlebitis und thromboembolische Ereignisse, einschließlich Lungenembolie (in Einzelfällen mit letalem Verlauf), berichtet.  
Die Behandlung mit Epirubicin kann von Azospermie und Amenorrhoe begleitet sein und kann zu einem vorzeitigen Eintritt der Menopause bei prämenopausalen Frauen führen.  
Epirubicin kann den Urin ein bis zwei Tage nach Verabreichung rot färben, was keine Bedeutung hat.

**7. Wechselwirkungen mit anderen Mitteln**

Da Epirubicin meist als Teil einer Kombinationstherapie mit anderen Zytostatika verwendet wird, kann sich die Gesamtoxizität, insbesondere hinsichtlich der Myelosuppression und gastrointestriellen Toxizität, verstärken.

Die gleichzeitige Anwendung von Epirubicin und anderen kardiotoxischen Substanzen (z. B. 5-Fluorouracil, Cyclophosphamid, Cisplatin, Taxane) oder einer Strahlentherapie des Mediastinums verstärken die Kardiotoxizität von Epirubicin. Daher ist hier, sowie bei gleichzeitiger Anwendung von anderen kardiotoxischen Substanzen (z. B. Calciumantagonisten) eine besonders sorgfältige Überwachung der Herzfunktion während der gesamten Therapie erforderlich.

Bei einer (Vor-)Behandlung mit Medikamenten, welche die Knochenmarkfunktion beeinflussen (z. B. Zytostatika, Sulfonamide, Chloramphenicol, Diphenhydrolin, Amidopyrin Derivate, antidiabetische Arzneimittel), ist die Möglichkeit einer ausgeprägten Störung der Hämatopoese zu beachten. Die Dosierung von Epirubicin ist gegebenenfalls zu modifizieren. Bei Kombination mit anderen Zytostatika (z. B. Cytosin, Cisplatin, Cyclophosphamid) können die toxischen Wirkungen der Epirubicintherapie verstärkt werden.

Epirubicin wird hauptsächlich in der Leber metabolisiert; jede Begleitmedikation, die die Leberfunktion beeinflusst, kann auch die Verstoffwechslung oder die Pharmakokinetik von Epirubicin und infolgedessen Wirksamkeit und/oder Toxizität beeinflussen.

Die Kombination von Epirubicin mit potentiell hepatotoxischen Arzneimitteln kann bei Beeinträchtigung des hepatischen Metabolismus und/oder der bilären Ausscheidung von Epirubicin zu einer Erhöhung der Toxizität der Substanz führen. Dies kann zu einer Verstärkung der Nebenwirkungen führen.

Bei gleichzeitiger Anwendung anderer Zytostatika erhöht sich das Risiko für das Auftreten gastrointestrieller Nebenwirkungen.

Arzneimittel, die zu einer Verzögerung der Harnsäureausscheidung führen (z. B. Sulfonamide, bestimmte Diuretika), können bei gleichzeitiger Anwendung von Epirubicin zu einer verstärkten Hyperurikämie führen.

Epirubicin bindet an Hepatin; es kann zu Ausfällungen und Wirkungsverlust beider Wirkstoffe kommen.

Die gleichzeitige Anwendung von Venopazil vermindert die systemische Verfügbarkeit von Epirubicin durch eine Erhöhung der Clearance. Dadurch kommt es zu einer erhöhten systemischen Verfügbarkeit der Epirubicinmetaboliten.

Cimetidin erhöht die AUC („Area under the curve“) von Epirubicin um 50 %. Aus diesem Grund sollte eine Behandlung mit Cimetidin bei Behandlung mit Epirubicinhydrochlorid unterbrochen werden.

**8. Warnhinweise**

Keine

**9. Wichtigste Inkompatibilitäten**

Wegen chemischer Inkompatibilität sollte FARMORUBICIN® CS Lösung nicht mit Heptan gemischt werden. Wenn FARMORUBICIN® CS Lösung in Kombination mit anderen Zytostatika verabreicht wird, sollte keine direkte Mischung erfolgen.





Ebenso sollte FARMORUBICIN® CS Lösung nicht mit einer alkalischen Lösung zu sämmergetracht werden (Hydrolyse).

**10. Dosierung mit Einzel- und Tagesgaben**

**1. Konventionelle Dosierung**

Intermittierende Therapie mit 75-90 mg Epirubicinhydrochlorid/m<sup>2</sup> Körperoberfläche als Einzelgabe jede dritte Woche.

**2. Polychemotherapie**

Wenn FARMORUBICIN® CS Lösung in Kombinationsschemata mit anderen Zytostatika angewandt wird, sollte die Dosis der Toxizität der anderen Zytostatika angepasst werden.

Eine Dosisreduktion (90-75 mg/m<sup>2</sup> bzw. 105-120 mg/m<sup>2</sup> bei dosisintensivierten Schemata) oder längere Intervalle zwischen den Behandlungszyklen können notwendig sein bei der Therapie von sehr alten Patienten, bei Patienten mit neoplastischer Knochenmarkinfektion sowie bei Patienten, deren Knochenmarkfunktion durch vorausgegangene Chemo- oder Strahlentherapie bereits geschädigt wurde.

Außerdem kann bei palliativem Behandlungskonzept zur Verringerung der Nebenwirkungen oder bei Patienten, bei denen Epirubicinhydrochlorid aus medizinischen Gründen nicht in der oben genannten Dosierung verabreicht werden kann, folgende Dosierung angewandt werden:

- wöchentliche Verabreichung von 20-30 mg/m<sup>2</sup> Körperoberfläche

**3.1 Dosisintensivierte Behandlung von fortgeschrittenen kleinzelligen Bronchialkarzinomen**

Intermittierende Therapie mit 120 mg Epirubicinhydrochlorid/m<sup>2</sup> Körperoberfläche als Einzeldosis jede dritte Woche.

**Besondere Hinweise**

Bei Patienten, deren Knochenmarkfunktion bereits durch vorhergehende Chemotherapie oder Bestrahlung bzw. durch Infiltration von Tumorzellen geschädigt ist, wird eine Dosisreduktion auf 105 mg Epirubicinhydrochlorid/m<sup>2</sup> Körperoberfläche empfohlen.

**3.2 Dosisintensivierte Behandlung beim Mammakarzinom (gilt nicht als Standardtherapie) zu**

- Behandlung des fortgeschrittenen Mammakarzinoms:  
135 mg Epirubicinhydrochlorid/m<sup>2</sup> Körperoberfläche in der Monotherapie bzw. 120 mg/m<sup>2</sup> Körperoberfläche in der Kombinationstherapie alle 3-4 Wochen.
- adjuvante Therapie bei Patientinnen mit Mammakarzinom im Frühstadium und positivem Lymphknotenstatus:  
100-120 mg Epirubicinhydrochlorid/m<sup>2</sup> Körperoberfläche alle 3-4 Wochen.

Sowohl in der adjuvanten Therapie als auch in der Therapie des metastasierten Mammakarzinoms sollten bei der Patientin vorab die hämatologischen und kardiologischen Parameter sowie auch die wichtigsten Organfunktionen überwacht werden.

Eine sorgfältige hämatologische Kontrolle ist notwendig, da eine Knochenmarkdepression bei dosisintensivierter Behandlung häufig auftritt. Eine schwere Neutropenie (neutrophile Granulozyten unter 500/µl über maximal 7 Tage) wurde meist nur während 10-14 Tagen nach Beginn der Behandlung beobachtet und ist vorübergehend. Im allgemeinen hat sich das Knochenmark bis zum 21. Tag wieder erholt. Aufgrund dieser kurzen Dauer bedürfen gewöhnlicherweise nur wenige Patienten der Aufnahme in eine Klinik oder besonderer Maßnahmen zur Behandlung schwerer Infektionen.

Eine Thrombozytopenie (Plättchenzahl unter 100 000/µl) tritt nur bei wenigen Patienten auf und ist selten schwer.

**Beurteilung der Leberfunktion**

Epirubicin wird vorwiegend über Galle und Leber ausgeschieden. Bei beeinträchtigter Leberfunktion oder Gallenabflüssen kann eine verzögerte Ausscheidung des Arzneimittels auftreten, wobei sich die Gesamtoxizität erhöht. Daher sollte die Leberfunktion (Bilirubin, SGOT, SGPT, alkalische Phosphatase) vor der Behandlung mit Epirubicin überprüft und bei Patienten mit beeinträchtigter Leberfunktion die Dosis erniedrigt werden. Empfehlungen für die Dosisverringering bei beeinträchtigter Leberfunktion richten sich nach den Plasma-Bilirubinwerten:

|                   |                   |
|-------------------|-------------------|
| Bilirubin         | Dosisreduktion um |
| 1,2-3,0 mg/100 ml | 50 %              |
| 3,1-5,0 mg/100 ml | 75 %              |

**Beurteilung der Nierenfunktion**

Aufgrund der nicht ausreichenden klinischen Datenlage kann keine Dosisempfehlung für Patienten mit eingeschränkter Nierenfunktion gegeben werden.

Im Falle einer sehr schweren Nierenauffizienz (glomeruläre Filtrationsrate < 10 ml/min oder Serumkreatinin > 5 mg/dl) kann im Einzelfall eine initiale Dosisreduktion auf 75 % erwogen werden.

**11. Art und Dauer der Anwendung**

Die Behandlung sollte nur von Ärzten, die in der Tumorbehandlung erfahren sind, in einer Klinik oder in Kooperation mit einer Klinik erfolgen. Insbesondere die dosisintensivierte Behandlung erfordert eine engmaschige Überwachung der Patienten wegen möglicher Komplikationen aufgrund der starken Myelosuppression. Die Anwendung ist streng nach Vorschrift durchzuführen.

Vor der Behandlung mit Epirubicin sollten Laborwerte sowie die Herzfunktion sorgfältig untersucht werden; während jedes Behandlungszyklus sind die Patienten sorgfältig und regelmäßig zu kontrollieren.

Die Dauer der Anwendung richtet sich nach dem Behandlungsprotokoll. Eine zeitliche Begrenzung der Anwendung ist nicht vorgesehen.

Die kumulative Maximaldosis (100-1000 mg/m<sup>2</sup> KOF) darf nur nach strenger Nutzen-Risiko Abwägung überschritten werden.

**Hinweise zum Gebrauch und zur Handhabung**

FARMORUBICIN® CS Lösung ist eine gebrauchsfertige Lösung und hat einen pH-Wert von 3,0. Vor Verabreichung soll FARMORUBICIN® CS Lösung auf Raumtemperatur gebracht werden.

FARMORUBICIN® CS Lösung enthält keine Konservierungsstoffe und ist daher nicht zur Mehrfachentnahme vorgesehen.

Beim Umgang mit FARMORUBICIN® CS Lösung muß Schutzkleidung getragen werden.

Wenn FARMORUBICIN® CS Lösung mit der Haut oder Schleimhaut in Berührung kommt, ist sorgfältiges Waschen mit Wasser und Seife zu empfehlen.

Eine Handtücher sollte allerdings nicht verwendet werden, um die Haut nicht zusätzlich mechanisch zu schädigen.

Bei Kontakt mit Haut oder Augen sollte sofort sorgfältig mit Wasser oder mit Wasser und Seife oder mit Natriumbicarbonatlösung gespült und ein Arzt aufgesucht werden.

Die Empfehlungen „Sichere Handhabung von Zytostatika“ des Merkblatts M100 der Berufsgenossenschaft Gesundheitsberufe und Wohlfühlpflege sollten beachtet werden.

**Intravenöse Applikation:**

FARMORUBICIN® CS Lösung wird intravenös appliziert.

Eine verpackte Injektionsflasche oder eine paravasale Applikation von FARMORUBICIN® CS Lösung muß bei der systemischen Verabreichung unbedingt ausgeschlossen werden.

FARMORUBICIN® CS Lösung darf nicht oral, subcutan, intramuskulär oder intrathekal verabreicht werden!

Die paravasale Injektion von Epirubicin schwerwiegende Gewebeschädigungen und auch Nekrosen verursachen können, wird empfohlen, das Arzneimittel bevorzugt in den Schlauch einer laufenden i.v.-Infusion mit 0,9%iger Natriumchloridlösung zu geben. Zur Überprüfung der korrekten Lage der Infusionsnadel werden zuvor einige ml einer Infusionslösung (z. B. 0,9%ige NaCl-Lösung) verabreicht. Die Gesamtmenge an FARMORUBICIN® CS Lösung wird innerhalb von 10-15 Minuten i.v. verabreicht. Venenstauungen können durch Injektion in zu kleine Venen oder wiederholte Injektionen in dieselbe Vene verursacht werden. Nach erfolgter Verabreichung wird die Vene mit dem Rest der Infusionslösung gespült.

**12. Nothilfmaßnahmen, Symptome und Gegenmittel**

**Symptome der Intoxikation**

Sehr hohe Einzel Dosen von FARMORUBICIN® CS Lösung können eine akute Myokardinfarktion innerhalb von 24 Stunden und eine schwere Myelosuppression innerhalb von 10-14 Tagen verursachen. Eine akute Überdosierung kann zu toxischen gastrointestinalen Erscheinungen (vor allem Mukositis) und akuten Komplikationen des Herz-Kreislaufsystems führen.

November 2001

M100-USA - FARMORUBICIN CS - 1

3



In Falle einer Überdosierung wurde spätes Herzversagen bis zu 6 Monaten nach der Behandlung mit Anthrazyklinen beobachtet.

**Therapie von Intoxikationen**

Bei Auftreten von Intoxikationserscheinungen sollte die Applikation von Epirubicin sofort abgebrochen werden.

Bei kardialer Beteiligung ist ein Kardiologe hinzuzuziehen.

Bei ausgeprägter Myelosuppression sollte die Substitution der fehlenden Blutbestandteile und die Verfügung des Patienten in einem kontrollierten Raum erfolgen werden.

Epirubicin ist in vivo nicht effektiv dialysierbar.

Einspezifisches Antidot ist nicht bekannt.

**Paravasate**

Eine paravenöse Fehlinjektion führt zu lokaler Nekrose und Thrombophlebitis. Sollte im Bereich der Injektionsstelle ein brennendes Gefühl entstehen, deutet dies auf eine paravenöse Applikation hin.

**Therapie von Paravasaten**

Bei erbigten Paravasaten ist die Infusion oder Injektion sofort zu stoppen; die Kanüle sollte zunächst belassen werden, um sie nach einer kurzen Aspiration zu entfernen. Es wird empfohlen, DMSO 99 % über ein Areal zweifach so groß wie das betroffene Areal lokal zu applizieren (4 Tropfen auf 10 cm<sup>2</sup> Hautoberfläche) und dies dreimal täglich über einen Zeitraum von mindestens 14 Tagen zu wiederholen. Gegebenenfalls sollte ein Deblatament in Erwägung gezogen werden. Wegen des gegensätzlichen Mechanismus sollte eine Kühlung des Areals, z. B. zur Schmerzreduktion, begleitend mit der DMSO-Applikation erfolgen (Vasokonstriktion vs. Vasodilatation). Andere Maßnahmen sind in der Literatur umstritten und von nicht eindeutigen Wert.

**13. Pharmakologische und toxikologische Eigenschaften, Pharmakokinetik und Bioverfügbarkeit, soweit diese Angaben für die therapeutische Verwendung erforderlich sind**

**13.1 Pharmakologische Eigenschaften**

Epirubicin ist ein Epimer des Anthrazyklin Antibiotikums Doxorubicin. Die pharmakologischen Eigenschaften entsprechen denen anderer Anthrazykline. Epirubicin ist in allen Phasen des Zellzyklus aktiv und zeigt maximale zytotoxische Effekte in der S- und G2-Phase des Zellzyklus. Der exakte anti-neoplastische Wirkungsmechanismus ist nicht vollständig geklärt, beruht jedoch höchstwahrscheinlich auf der Fähigkeit durch Interkalation zwischen DNA-Basenpaaren Komplexe mit der DNA zu bilden. Dies führt zu einer statischen Behinderung der DNA- und RNA-Synthese. Die Interkalation scheint ferner mit dem Topoisomerase-DNA-„cleavable complex“ zu interferieren. Weitere Wirkmechanismen, die diskutiert werden, sind die Bildung freier Radikale, eine direkte Membranwirkung sowie die Chelatbildung mit Metall-Ionen.

Epirubicin ist gegen ein weites Spektrum experimenteller Tumoren wirksam, darunter die Leukämien (L1210 und P388; Sarkom SA180 (solide und azotische Form), Melanom B16, Mammarkarzinom, Lewis-Lungenkarzinom und Kolonkarzinom). Die Wirksamkeit gegen humane Tumoren die in athymische Nacktmäuse implantiert wurden, konnte ebenfalls nachgewiesen werden (Melanom, Mamma-, Lungen-, Prostata- und Ovarialkarzinom).

**13.2 Toxikologische Eigenschaften**

**a) Akute Toxizität**

Die LD<sub>50</sub> von Epirubicin beträgt 29,3 mg/kg bei Mäusen, 14,2 mg/kg bei Ratten und ca. 2,0 mg/kg bei Hunden. Die Zielorgane nach Einmalgabe waren hauptsächlich das hämatolymphepoetische System und vor allem bei Hund und Ratte der Gastrointestinaltrakt.

**b) Chronische Toxizität**

Die Toxizität nach wiederholter Gabe von Epirubicin wurde bei Ratten, Kaninchen und Hunden untersucht. Epirubicin wirkte vor allem toxisch auf das hämatolymphepoetische System, Gastrointestinaltrakt, Nieren, Leber und männliche und weibliche Geschlechtsorgane. Bei allen Tierarten wies Epirubicin karzinoxische Eigenschaften in subakuten und Karzinozitizitäts-Studien auf. Epirubicin zeigte jedoch einen besseren therapeutischen Index und niedrigere systemische und kardiale Toxizität als Doxorubicin.

**c) Mutagenes und tumorerzeugendes Potential**

Epirubicin weist wie andere Anthrazykline und Zytostatika karzinoxische Eigenschaften bei Ratten auf. Epirubicin wirkt in vitro oder in vivo mutagen.

**d) Reproduktionstoxizität/teratogenität**

Epirubicin wirkt in vitro oder in vivo reproduktionstoxisch und bei Ratten embryotoxisch.

Bei Ratten und Kaninchen wurden keine Missbildungen beobachtet, Epirubicin muß jedoch wie andere Anthrazykline und Zytostatika als potentiell teratogen angesehen werden.

Prüfungen an Kaninchen zeigten bei einer Dosierung von 0,1 und 0,2 mg Epirubicinhydrochlorid/kg/Tag keinen signifikanten Unterschied in den Parametern für Teratogenität gegenüber der Kontrollgruppe; bei Dosen von 0,4 mg Epirubicinhydrochlorid/kg/Tag zeigte sich eine gravere Toxizität mit hoher Mortalität der Mütter und zahlreichen Aborten.

Es ist nicht bekannt, ob die Substanz mit der Muttermilch ausgeschieden wird.

**13.3 Pharmakokinetik**

Nach intravenöser Gabe wird Epirubicin rasch in den meisten Geweben angereichert. Trotz des großen Verteilungsvolumens von Epirubicin zeigen tierexperimentelle Untersuchungen, daß Epirubicin nur in sehr geringem Maß die Blut-Hirn-Schranke überwindet.

Epirubicin unterliegt einer triphasischen Plasmaclearance, charakterisiert durch eine schnelle initiale Verteilungsphase (t<sub>1/2α</sub>: 3,0–4,0 Minuten), gefolgt von einer intermediären Eliminationsphase (t<sub>1/2β</sub>: 1,1–2,6

Stunden) und einer langsamen terminalen Eliminationsphase (t<sub>1/2γ</sub>: 18–45 Stunden).

Das Verteilungsvolumen von Epirubicin Vd beträgt 32–45 l/kg. Die Plasmaclearance liegt bei 90–100 l/h.

Epirubicin wird hauptsächlich in der Leber metabolisiert. Ein aktiver Metabolit (Epirubicinol) und 6 inaktive Metaboliten (Epirubicinol-Glukuronid, Epirubicin-Glukuronid sowie 4 Aglykone) konnten identifiziert werden. Epirubicinol weist in vitro eine 10-mal geringere zytotoxische Aktivität auf als Epirubicin. Für die anderen Metaboliten konnte keine signifikante Aktivität oder Toxizität nachgewiesen werden.

Eben 6–7 % einer verabreichten Dosis werden unverändert renal ausgeschieden, weniger als 5 % als Glukuronide und geringere Anteile als Epirubicinol. Nach hepatischer Metabolisierung werden ca. 35 % einer verabreichten Dosis durch biläre Exkretion eliminiert. Die biläre und renale Clearance betragen 8–33 bzw. 4–15 Stunden.

**14. Sonstige Hinweise**

Schwangerschaft und Stillzeit (s. Ziffer 5).

Erforderliche Kontrolluntersuchungen und Sicherheitsmaßnahmen:

Kontrollen des Blutbildes (insbesondere Leukozyten, Thrombozyten, Erythrozyten) sind vor und während jeder Behandlungszyklus erforderlich.

Vor Therapiebeginn sollte zum Ausschluß einer Leberinsuffizienz die Leberfunktion überprüft werden.

Die Herzfunktion muß vor Therapiebeginn, während und nach Beendigung der Therapie überwacht werden (EKG, Radionuklid-angiographie oder Echokardiographie [zur Bestimmung der LVEF]).

Nach Beginn der Behandlung sollten die Hämaturie, Kalium, Kalziumphosphat und Kreatininwerte überprüft werden.

Hydratation, Alkalisierung des Urins und prophylaktische Gabe von Alkalinurika zur Vermeidung einer Hyperkaliämie können das Risiko potentieller Komplikationen des Tumor-Lyse-Syndroms senken.

**15. Dauer der Haltbarkeit**

3 Jahre

**16. Besondere Lager- und Aufbewahrungshinweise**

Die Lagerung muß bei +2° bis +8°C und vor Licht geschützt erfolgen.

**17. Darreichungsform und Packungsgrößen**

FARMORUBICIN® CS 10 mg Lösung  
Originalpackungen mit 1 [N1], 6 [N1] Durchstechflasche(n) zu 10 ml mit 10 mg Epirubicinhydrochlorid  
Klinikpackungen mit 10 (10 x 1) Durchstechflaschen zu je 5 ml mit 10 mg Epirubicinhydrochlorid

FARMORUBICIN® CS 20 mg Lösung  
Originalpackungen mit 1 [N1], 6 [N1] Durchstechflasche(n) zu 10 ml mit 20 mg Epirubicinhydrochlorid  
Klinikpackungen mit 10 (10 x 1) Durchstechflaschen zu je 10 ml mit 20 mg Epirubicinhydrochlorid



FARMORUBICIN® CS 50 mg Lösung  
 Originalpackungen mit 1 **[N3]**, 6 **[N3]**  
 Durchstechflasche(n) zu 25 ml mit 50 mg  
 Epirubicinhydrochlorid  
 Klinikpackungen mit 10 (10 x 1) Durch-  
 stechflaschen zu je 25 ml mit 50 mg Epirubi-  
 cinhydrochlorid

FARMORUBICIN® CS 200 mg Lösung  
 Originalpackungen mit 1 **[N1]** Durch-  
 stechflasche zu 100 ml mit 200 mg Epirubi-  
 cinhydrochlorid  
 Klinikpackungen mit 1, 10 (10 x 1) Durch-  
 stechflaschen zu je 100 ml mit 200 mg Epi-  
 rubicinhydrochlorid

**18. Stand der Information**

November 2001

**19. Name oder Firma und Anschrift  
 des pharmazeutischen  
 Unternehmens**

Pharmacia GmbH  
 91051 Erlangen  
 Tel. 09131 (82-0)

November 2001

4411454 - FARMORUBICIN CS - 0

Zentrale Anbrderung an:

Bundesverband der  
 Pharmazeutischen Industrie e. V.

FachInfo-Service

Postfach 12 45  
 88322 Aulendorf

5





## 8.11.4 Cyclophosphamide

Fachinformation

**Baxter**

**Endoxan®**

### 1. Bezeichnung des Arzneimittels

Endoxan®  
Wilcoff, Cyclophosphamid

### 2. Verschreibungsstatus/ Apothekspflicht

Verschreibungspflichtig

### 3. Zusammensetzung des Arzneimittels

#### 3.1 Stoff- oder Indikationsgruppe

Zytostatikum aus der Gruppe der Alkylantien

#### 3.2 Arzneilich wirksamer Bestandteil

**Endoxan® 100 mg**  
1 injektionsfähige Endoxan® 100 mg Trocken-substanz enthält:  
Cyclophosphamid - 1 H<sub>2</sub>O 100,9 mg (entspricht 100 mg Cyclophosphamid - H<sub>2</sub>O-frei)

**Endoxan® 200 mg**  
1 injektionsfähige Endoxan® 200 mg Trocken-substanz enthält:  
Cyclophosphamid - 1 H<sub>2</sub>O 201,8 mg (entspricht 200 mg Cyclophosphamid - H<sub>2</sub>O-frei)

**Endoxan® 500 mg**  
1 injektionsfähige Endoxan® 500 mg Trocken-substanz enthält:  
Cyclophosphamid - 1 H<sub>2</sub>O 504,5 mg (entspricht 500 mg Cyclophosphamid - H<sub>2</sub>O-frei)

**Endoxan® 1 g**  
1 injektionsfähige Endoxan® 1 g Trocken-substanz enthält:  
Cyclophosphamid - 1 H<sub>2</sub>O 1009,0 mg (entspricht 1000 mg Cyclophosphamid - H<sub>2</sub>O-frei)

**Endoxan®**  
1 Droge Endoxan® enthält:  
Cyclophosphamid - 1 H<sub>2</sub>O 50,5 mg (entspricht 50 mg Cyclophosphamid - H<sub>2</sub>O-frei)

#### 3.3 Sonstige Bestandteile

**Endoxan®**  
Calciumcarbonat, Calciumhydrogenphosphat, Carboxymethylcellulose, Cellulose, Glycerol, Lactose, Magnesiumstearat, Magnesiumsilicat, Monoglycerid, Polysorbit, Polylactid, Saccharose, Siliciumdioxid, Titandioxid, Tinktur.

### 4. Anwendungsgebiete

Endoxan® wird im Rahmen eines Polychemotherapieprogramms oder als Monotherapie eingesetzt bei:

**Leukämien**  
Akute und chronische lymphatische und myeloische Leukämien.

**Maligne Lymphome**  
Malignes Hodgkin, Non-Hodgkin-Lymphom, Plasmocytom.

**Metastasierende und nichtmetastasierende solide solide Tumoren**  
Ovarialkarzinom, Hodenkarzinom, Mammakarzinom, Harnblasenkarzinom, Bronchialkarzinom, Neuroblastom, Ewing-Sarkom.

**Bedeutlich verbleibende „Autoimmunantigenreifer“**  
z. B. rheumatoide Arthritis, Arthropathia pro-

latica, systemischer Lupus erythematosus, Sklerodermie, systemische Vasculitiden (z. B. mit nephritischem Syndrom), bestimmte Formen der Glomerulonephritis (z. B. mit nephritischem Syndrom), Myositis gravis, autoimmunhämolytische Anämie, Kollagen- und Bindegewebskrankheiten, immunsuppressive Behandlung bei Organtransplantation.

#### Besonderer Hinweis:

Tritt unter der Behandlung mit Endoxan® eine Zytose mit Mikro- oder Metakaryose auf, sollte die Therapie bis zur Normalisierung abgebrochen werden.

### 5. Gegenanzeigen

- Endoxan® soll nicht angewendet werden bei:
  - bekannter Überempfindlichkeit gegen Cyclophosphamid
  - schwerer Beeinträchtigung der Knochenmarkfunktion (insbesondere bei zytostatisch und/oder strahlentherapeutisch vorbehandelten Patienten)
  - Eisenreineinwirkung (Zytose)
  - Harnabflussbehinderungen
  - fetalen Wirkstoffen
  - zur Anwendung in Schwangerschaft und Stillzeit, s. 14. Sonstige Hinweise.

#### Hinweise:

Aktusbehinderungen innerhalb der ableitenden Harnwege, Harnblaseinzündung sowie Infektionen und Elektrolytstörungen müssen vor Therapiebeginn ausgeschlossen bzw. behoben werden.

Endoxan® sollte wie alle Zytostatika generell mit Vorsicht bei geschwächten und älteren Patienten angewendet werden sowie bei Patienten, die zuvor eine Bestrahlungsbildung erhalten.

Besondere Vorsicht ist ebenfalls bei Patienten mit geschwächtem Immunsystem geboten wie z. B. Diabetes mellitus, chronischen Leber- oder Nierenfunktionsstörungen.

### 6. Nebenwirkungen

Unter der Therapie mit Endoxan® kann es dosisabhängig zum Auftreten folgender, meist reversibler Nebenwirkungen kommen:

**Blut und Knochenmark:**  
In Abhängigkeit von der Dosis können unterschiedlich schwere Grade von Myelo-suppressionen mit Leukozytopenie, Thrombozytopenie und Anämie auftreten. Häufig ist mit einer Leukozytopenie ein und ohne Fieber und der Gefahr von sekundären (zum Teil lebensbedrohlichen) Infektionen, sowie mit einer Thrombozytopenie und der Gefahr eines erhöhten Blutungsrisikos zu rechnen. Die niedrigsten Leukozyten- und Thrombozytenwerte treten in der Regel in der 1. bis 2. Woche nach Behandlungsbeginn auf und sind innerhalb 3 bis 4 Wochen nach Behandlungsbeginn wieder erholt. Eine Anämie entwickelt sich in der Regel erst nach mehreren Behandlungszyklen. Bei chronischer oder wiederholungsbedürftig vorbehandelten Patienten und bei Patienten mit einer Nierenfunktionsstörung ist mit einer stärkeren Myelo-suppression zu rechnen.

Bei der Kombinationstherapie mit anderen myelo-suppressiven Medikamenten muss unter Umständen eine Dosisanpassung erfolgen. Es wird auf die einschlägigen Tabellen zur Dosisanpassung von Zytostatika an die Blutblutwerte bei Zyklusbeginn und an die nach engpassierte Zytostatika-Dosierung verwiesen.

#### Gastrointestinal:

Gastrointestinale Nebenwirkungen wie Übelkeit und Erbrechen sind dosisabhängige Nebenwirkungen. Mäßige bis schwere Formen kommen in etwa der Hälfte der Fälle vor. Selbener kommt es zu Anorexie, Dehydration und Obstipation sowie zu Entzündungen der Schleimhaut (Mucositis) wie Schmerzen bis hin zur Ulzeration. Es gibt Einzelstärke von hämorrhagischer Kolitis.

#### Nieren und ableitende Harnwege:

Metabolite von Cyclophosphamid ruhen nach Ausscheidung in den Urin in den ableitenden Harnwegen, insbesondere in der Blase. Veränderungen hervor. Hämorrhagische Zystitis, Mikrohämaturie und Miktionshäufigkeit ist eine häufige und dosisabhängige Komplikation einer Therapie mit Endoxan®, die eine Unterbrechung der Behandlung erfordert. Die Zytose ist zunächst abtötend, eine sekundäre Komplikation kann erfolgen. Es gibt Einzelstärke über hämorrhagische Zystitis mit Todesfolge, Blasenwandödemen, subkutanen Blutungen, interstitielle Entzündungen mit Fibrose sowie möglicherweise Blasenwandödemen werden ebenfalls beobachtet.

Selten sind Schädigungen der Nieren (insbesondere bei vorbestehender Nierenfunktionsstörung) nach höheren Dosierungen.

#### Hinweis:

Die Verabreichung von Urätemerzen® oder starke Hydratation können die Häufigkeit und den Ausprägungsgrad dieser unersichtlichen Nebenwirkungen deutlich herabsetzen.

#### Gonadotropin:

Aufgrund des alkylierenden Wirkprinzips ist durch Untersuchungen, dass zum Teil irreversible Störungen der Spermatogenese und daraus resultierende Azoospermie bzw. anhaltende Oligospermie auftreten können. Seltener sind Störungen der Ovarien, die z. T. irreversible Verluste können, mit daraus resultierender Amenorrhoe und niedrigem Spiegel weiblicher Sexualhormone.

#### Leber:

Selten wurde über Leberfunktionsstörungen berichtet, die sich mit einem Anstieg der entsprechenden Leberwerte äußern (SGOT, SGPT, gamma-GT, alkalische Phosphatase, Bilirubin).

Veno-occlusive disease (VOD) wird bei ca. 15–50 % der Patienten beobachtet, die hochdosis Cyclophosphamid in Kombination mit Busulfan oder Ganciclovirbestrahlung im Rahmen einer allogenen Knochenmarkstransplantation bekommen. Eine VOD wird dagegen nur selten bei Patienten mit aplastischer Anämie beobachtet, die Cyclophosphamid allein erhalten. Das Syndrom entwickelt sich typischerweise 1–3 Wochen nach der Transplantation und ist durch glatte Gewichtsanzunahme, Hepatosplenomegalie, Ascites und Hypertendenz charakterisiert. Eine hepatische Ernsphalopathie kann sich ebenfalls entwickeln.

Januar 2002

0726494 - Endoxan - 1

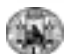

SUCCESS-Trial, Version 1.2, 15.8.2005

Anschrift: D-80337 München • Maistraße 11 • Telefon (0 89) 51 60-4111 (Vermittlung)

Page 184

Bekannte Risikofaktoren für die Entwicklung einer VOD sind vorbestehende Leberfunktionsstörungen, eine Therapie mit hepatotoxischen Arzneimitteln im zeitlichen Zusammenhang mit der Hochdosischemotherapie und insbesondere das Abklingen Busulfan als Therapieschritt der Konditionierungstherapie.

**Herz-Kreislauf und Lunge**

In Einzelfällen kann sich Pneumothorax, interstitielle Pneumonie, bis hin zur chronischen interstitiellen Lungenerkrankung entwickeln. Über das Auftreten einer sekundären Zytostatika-induzierten Kardiomyopathie, die sich als Arrhythmien, EKG-Veränderungen, LVF (z. B. Myokardinfarkt) zeigen kann, wurde insbesondere nach hohen Gaben von Cyclophosphamid (120–240 mg/kg Körpergewicht) berichtet. Es gibt weiterhin Hinweise auf eine erhöhte kardiotoxische Wirkung von Cyclophosphamid bei vorhergehender Bestrahlungsbildung der Herzregion und bei zusätzlicher Behandlung mit Anthracyclinen oder Perostatin. Auf die Nierentoxizität von neoplastischen Elektrolytstörungen und auf besondere Vorsicht bei Patienten mit vorbestehenden Herzveränderungen muss in dieser Zusammenhang hingewiesen werden.

**Zweitumoren**

Wie generell bei zytostatischer Therapie besteht auch bei Gabe von Cyclophosphamid das Risiko, dass als Spätfolge der Therapie Zweitumoren oder ihre Vorstufen auftreten können. Ein erhöhtes Risiko besteht z. B. für die Entwicklung von Hämangioendotheliomen sowie für myelodysplastische Veränderungen bis hin zu akuten Leukämien. Im Falle von Blasenkarzinomen kann das Risiko, wie Untersuchungen an der Ratte belegen, durch adjuvante Gabe von Urokinase® deutlich reduziert werden.

**Sonstige Nebenwirkungen**

Der häufig auftretende Harnrüssel ist in der Regel reversibel. Über Nierenveränderungen von Hämoglobin, Fingernägeln und Fußsohlen wurde berichtet.

Außerdem wurden folgende Nebenwirkungen beobachtet:

- SIADH (Syndrom der inadäquaten ADH-Sekretion, Schwarz-Berme-Syndrom) mit Hyponatriämie und Wasserretention
- Haut- und Schleimhautentzündungen
- Überempfindlichkeitsreaktionen wie Fieber, in Einzelfällen bis zum Schock
- vorübergehendes Verschönerensehen und Schwachblindersehen
- in Einzelfällen akute Peritonitis
- in sehr seltenen Fällen (Häufigkeit 0,01 %) wurde über schwere Hautreaktionen wie z. B. Stevens-Johnson-Syndrom, Toxische Epidermale Nekrolyse berichtet.

**Hinweise**

Bestimmte Komplikationen wie Thrombozytopenie, DIC (disseminierte intravasculäre Gerinnung) oder hämolytisch-urämisches Syndrom (HUS), die u. a. durch die zugrundeliegende Erkrankung hervorgerufen werden können, können unter einer Endoxan®-basierten Chemotherapie verstärkt auftreten. Auf die rechtzeitige Gabe von Antikoagulantia sowie einer sorgfältigen Mundpflege ist zu achten.

Blutbildkontrollen müssen während der Behandlung regelmäßig durchgeführt werden bei der Antriegsbehandlung in Abständen von 5–7 Tagen, bei Leukozytenwerten unter 2000 pro mm<sup>3</sup> in Abständen von 2 Tagen, u. U. täglich. Bei der Dauerbehandlung genügen im allgemeinen Kontrollen in Abständen von etwa 14 Tagen. Auch das Hämoglobin sollte regelmäßig auf Erythrozytenkontrollen werden.

**7. Wechselwirkungen mit anderen Mitteln**

Die blutzuckersenkende Wirkung von Sulfonharnstoffen kann verstärkt werden, ebenso die myelo-suppressive Wirkung bei gleichzeitiger Gabe von Filgrastim oder Hydrocortison.

Bei vorangehender oder gleichzeitiger Behandlung mit Phenobarbital, Phenyton, Benzodiazepinen oder Chloralhydrat besteht die Möglichkeit der induktion mikrosomaler Leberenzyme.

Wegen der immunsuppressiven Effekte von Cyclophosphamid ist mit einem verminderten Ansprechen auf die jeweilige Vaccine und bei Lebendvaccinen mit einer Infektion durch den Impfstoff zu rechnen.

Bei gleichzeitiger Gabe depolarisierender Muskelrelaxantien (z. B. Succinylcholinhalogenid) kann es über eine Verlängerung der Pseudocholinesterasekonzentration zu einer länger anhaltenden Apnoe kommen. Die gleichzeitige Gabe von Chloroquinol bewirkt eine Verlängerung der Halbwertszeit von Cyclophosphamid und verzögerte Metabolisierung.

Anthracycline und Perostatin können die potentielle Kardiotoxizität von Cyclophosphamid verstärken. Eine Verstärkung der kardiotoxischen Wirkung wird auch bei vorhergehender Bestrahlungsbildung der Herzregion angenommen.

Die gleichzeitige Gabe von Inzesthetan sollte sehr vorsichtig erfolgen, da in einem Einzelfall eine akute Wasserretention beobachtet wurde.

Genaui sollte bei einer Cyclophosphamid-Behandlung auf den Genuss alkoholischer Getränke verzichtet werden.

Wegen der Möglichkeit einer verminderten Abklärung und damit veränderter Wirkkonzentration von Cyclophosphamid durch eine in Grapefruit enthaltene Substanz sollte auf den Genuss von Grapefruit oder Grapefrutsaft verzichtet werden.

**8. Warnhinweise**

Kiine

**9. Wichtigste Inkompatibilitäten**

Die Stabilität von Cyclophosphamid kann in benzalkoholhaltigen Trichterlösungen eingeschränkt sein.

**10. Dosierung mit Einzel- und Tagesgaben**

Die Dosierung sollte stets individuell erfolgen. Soweit nicht anders verordnet, gilt als Dosierungsempfehlung:

**Endoxan® 100 mg, 200 mg, 500 mg, 1 g Injektionsflaschen**

- Als Dauertherapie bei Erwachsenen und Kindern 3 bis 5 mg/kg Körpergewicht täglich (entsprechend 100 bis 240 mg/m<sup>2</sup> Körperoberfläche)
- Als Intensivtherapie 10 bis 15 mg/kg Körpergewicht (entsprechend 400 bis 600 mg/m<sup>2</sup> Körperoberfläche) in Abständen von 2 bis 5 Tagen
- Als hochdosierte Intensivtherapie z. B. 20 bis 40 mg/kg Körpergewicht (entsprechend 600 bis 1000 mg/m<sup>2</sup> Körperoberfläche) und höhere Dosen (z. B. zur Konditionierung vor Hochdosisstrahlentherapie) in Abständen von 21 bis 28 Tagen.

**Endoxan® Dragees**

Zur Dauertherapie werden täglich 1–4 Dragees (50–200 mg) oder nach ärztlicher Anweisung auch mehr eingenommen.

**Hinweis:**

Diese Dosierungsempfehlungen gelten in erster Linie für eine Cyclophosphamidmonotherapie. Bei Kombination mit anderen chemotherapeutischen Substanzen ähnlicher Toxizität kann eine Dosisreduktion oder eine Verlingerung der Therapieintervalle erforderlich werden.

**Empfehlungen zur Dosisreduktion bei Myelosuppression**

| Leukozytenzahl (µl) | Thrombozytenzahl (µl) | Dosierung                                                         |
|---------------------|-----------------------|-------------------------------------------------------------------|
| > 4000              | > 100 000             | 100 % der vorgeschriebenen Dosis                                  |
| 4000–2500           | 100 000 bis 50 000    | 50 % der vorgeschriebenen Dosis                                   |
| < 2500              | < 60 000              | Verschiebung bis zur Normalkönnung oder individuelle Entscheidung |

**Empfehlung zur Dosisanpassung bei Leber- und Nierensuffizienz**

Bei schwerer Leber- oder Nierensuffizienz bedingen eine Dosisreduktion. Bei einem Serumkreatininwert von 3,1 bis 5 mg/100 ml ist eine 25%ige Dosisreduktion zu empfehlen. Bei einer glomerulären Filtrationsrate von unter 10 ml/Minut ist eine 50%ige Dosisreduktion zu empfehlen.

**11. Art und Dauer der Anwendung**

Für die Handhabung und den Umgang mit Zytostatika gilt generell das jeweils gültige Merkblatt der Berufsgenossenschaft für Gesundheitsdienst und Verkehrshilfsberufe.

Die Anwendung sollte ausschließlich durch onkologisch ausgebildete Ärzte erfolgen.

**Endoxan® 100 mg, 200 mg, 500 mg, 1 g Injektionsflaschen**

**Herstellung der Lösung**

Zur Herstellung einer sterilisierbaren Lösung wird der Trochimisubstanz die entsprechende Menge physiologische Kochsalzlösung zugesetzt. Dabei werden zu Endoxan® 100 mg Steril, Endoxan® 200 mg 10 ml, En-



dosen® 500 mg/25 ml und Endoxan® 1 g/50 ml physiologische Kochsalzlösung zugefugt.

Die Substanz löst sich leicht, wenn die Injektionsflasche nach Einpritzen des Lösungsmittels kräftig geschüttelt wird. Wenn hierbei die Auflösung nicht so rasch erfolgt, ist es zweckmäßig, die Lösung einige Minuten stehen zu lassen.

Diese Lösung ist zur intravenösen Anwendung geeignet, die bevorzugt als Infusion erfolgen sollte. Zur intravenösen Injektion wird die so hergestellte Endoxan®-Lösung z. B. auf 500 ml Ringel-Lösung, Kochsalz- oder Dextrose-Lösung aufgefällt.

Die Injektionsdauer kann je nach Volumen zwischen 30 Minuten und 2 Stunden betragen.

Die Therapiedauer bzw. Intervallabstände richten sich nach Indikation, angewandtem Kombinationschemotherapieplan, dem Zustand des Patienten und der Erholung des Blutbildes.

Aufwachtende Flüssigkeitszufuhr und die Anwendung des Uroprotektors® Uromitran® ist zu beachten.

**Endoxan® Dragees**

Es empfiehlt sich, Endoxan® Dragees morgens zu verabreichen und vor, während bzw. unmittelbar nach der Gabe ausreichende Mengen Flüssigkeit zu sich zu nehmen. Auf eine regelmäßige Blutzuckerüberwachung ist zu achten. Die Therapiedauer bzw. Intervallabstände richten sich nach Indikation, angewandtem Kombinationschemotherapieplan, den Laborparametern, dem Zustand des Patienten und der Erholung des Blutbildes.

**12. Notfallmaßnahmen, Symptome und Gegenmittel**

Da es kein spezifisches Antidot für Cyclophosphamid gibt, ist bei jeder Anwendung große Vorsicht geboten. Cyclophosphamid ist dialysierbar. Bei der Behandlung der Überdosierung bzw. der Intoxikation sudanese oder akuteinfacher Art ist daher eine rasche Hämodialyse angezeigt. Aus der Konzentration an unmetabolisiertem Cyclophosphamid in Dialysat wurde eine Dialyse-Clearance von 78 ml/min errechnet (die normale renale Clearance liegt bei ca. 5–11 ml/min). Eine zweite Arbeitsgruppe fand einen Wert von 154 ml/min. Nach einer sechsständigen Dialyse wurden 72 % der applizierten Cyclophosphamidosis im Dialysat gefunden. Bei einer Überdosis muss u. a. mit einer Myelosuppression, vorwiegend einer Leukozytopenie, gerechnet werden. Die Schwere und Dauer der Myelosuppression richtet sich nach dem Grad der Überdosis. Engmaschige Blutbildkontrollen und Überwachung des Patienten sind erforderlich. Im Falle einer Neutropenie müssen eine Infektionsprophylaxe und bei Infektionen eine adäquate Antibiose erfolgen. Im Falle einer Thrombozytopenie ist eine bedarfsgerechte Substitution mit Thrombozyten sicherzustellen. Zur Vermeidung urtöxischer Erscheinungen sollte unbedingt mit Uromitran® (Murel) eine Zystitis-Prophylaxe betrieben werden.

**Hinweis:**

Bei unübersichtlicher parenteraler Injektion einer vorabfeinverteilten rekonstruierten Cyclophosphamid-Lösung besteht Überdosierungsrisiko die Gefahr einer zytostatisch bedingten Gewebschädigung, da diese überwiegend erst nach Bioaktivierung von Cyclophosphamid in der Leber einsetzt. Kurzum es zu einer Paravasation sollte die Injektion dennoch sofort gestoppt werden, das Paravasat bei liegender Nadel aspiriert, mit Kochsalzlösung nachgespült und die Extremität ruhiggestellt werden.

**13. Pharmakologische und toxikologische Eigenschaften, Pharmakokinetik und Bioverfügbarkeit, soweit diese Angaben für die therapeutische Verwendung erforderlich sind**

**13.1 Pharmakologische Eigenschaften**

Cyclophosphamid ist ein Zytostatikum aus der Gruppe der Oxazaphosphorine. Es ist chemisch als Säckstoff vorzuziehen. Cyclophosphamid ist in vivo inaktiv und wird in vivo überwiegend in der Leber durch mikrosomale Enzyme zu 4-Hydroxycyclophosphamid aktiviert, das mit seinem Tautomerem Aldophosphamid im Gleichgewicht steht.

Die zytostatische Wirkung von Cyclophosphamid beruht auf einer Interaktion seiner alkylierenden Metaboliten mit der DNA. Ringe der Alkylierung sind Strangbrüche und Verzerrungen der DNA-Stränge bzw. DNA-Proteinvernetzungen („Crosslinks“). Im Zellzyklus wird eine Verlangsamung der Passage durch die G<sub>2</sub>-Phase verursacht. Die zytostatische Wirkung ist nicht zellzyklusunabhängig, aber zellzykluspezifisch.

Eine Kreuzreaktion vor allem mit strukturell verwandten Zytostatika, wie z. B. Ifosfamid, aber auch anderen Alkylierern, ist nicht auszuschließen.

**13.2 Toxikologische Eigenschaften**

**Akute Toxizität**

Die akute Toxizität von Cyclophosphamid ist im Vergleich zu anderen Zytostatika verhältnismäßig gering. Dies wurde in Experimenten an Mäusen, Meeresschweinfäher, Kanarienvögeln und Hunden nachgewiesen. Bei einmaliger i.v. Injektion beträgt die LD<sub>50</sub> bei der Ratte etwa 160 mg/kg, bei Maus und Meeresschweinchen 400 mg/kg, beim Kanarienvogel 120 mg/kg und beim Hund 40 mg/kg.

**Chronische Toxizität**

Die chronische Gabe toxischer Dosen führt zu Leberfunktionsstörungen im Sinne einer Verletzung mit anschließender Fibrose. Die Darmschleimhaut wird nicht angegriffen. Die Schwelle für die hepatotoxische Wirkung liegt beim Kanarienvogel bei 500 mg/kg, beim Hund bei 10 mg/kg.

Cyclophosphamid bzw. seine aktiven Metaboliten wirken im Tierversuch mutagen, karcinogen und teratogen.

**13.3 Pharmakokinetik**

Cyclophosphamid wird aus dem Magen-Darm-Trakt nahezu vollständig resorbiert. Beim Menschen tritt nach einer einzigen intravenösen Gabe von radioaktiv markiertem Cyclophosphamid die Plasmaskonzentration

der Substanz und ihrer Metaboliten innerhalb von 24 Stunden sehr stark ab, wobei aber nachweisbare Plasmaskonzentrationen bis zu 72 Stunden vorhanden sein können. Cyclophosphamid ist unter in vivo-Bedingungen inaktiv und wird erst im Organismus bioaktiviert.

Die mittlere Halbwertszeit von Cyclophosphamid im Serum beträgt bei Erwachsenen ca. 7 und bei Kindern ca. 4 Stunden. Cyclophosphamid und seine Metaboliten werden zum größten Teil renal ausgeschieden.

**13.4 Bioverfügbarkeit**

Die Blutspiegel nach i.v. und oraler Applikation sind bioäquivalent.

**14. Sonstige Hinweise**

**Anwendung in der Schwangerschaft und Stillzeit:**

Die Behandlung mit Cyclophosphamid kann bei Frauen und Männern erbgutverändernd wirken.

Bei viable Injektion zur Behandlung einer Pathologie ist während des 1. Trimenons der Schwangerschaft eine medizinische Beratung zur Schwangerschaftsunterbrechung zwingend erforderlich.

Nach dem 1. Trimenon der Schwangerschaft sollte bei nicht abzuschließender Deutlichkeit der Therapie und Kinderwunsch eine Chemotherapie nach vorheriger Aufklärung über das Gelingen, aber nicht auszuschließende Risiko von Auffälligkeiten der Kinder durchgeführt werden.

Frauen sollten während der Behandlung mit Endoxan® nicht schwanger werden.

Tier während der Behandlung dennoch eine Schwangerschaft ein, so ist die Möglichkeit einer genetischen Erregung zu raten.

Da Cyclophosphamid in die Muttermilch übertritt, darf während der Behandlung nicht gestillt werden.

Männern, die mit Endoxan® behandelt werden, wird empfohlen, sich vor Therapiebeginn über eine Spermienkonservierung beraten zu lassen.

Nach Abschluss der Chemotherapie bei Männern oder Frauen sollte sich die Konzeptionsdauer nach der Prognose der Grunderkrankung und dem Kinderwunsch der Eltern richten.

**Richtlinie zur Dosisreduktion bei Myelosuppression**

Leukozytosenormen müssen während der Behandlung regelmäßig durchgeführt werden, bei der Anfangsbehandlung in Abständen von 5–7 Tagen, bei Weiterlauf 2–3 Tage, u.U. täglich. Bei der Dauerbehandlung genügen im allgemeinen Kontrollen in Abständen von etwa 14 Tagen. Wenn Zeichen einer Knochenmarkschädigung bestehen, ist auch eine Kontrolle des roten Blutbildes und der Thrombozyten notwendig (siehe Dosierung). Auch das Hämoglobin sollte regelmäßig auf Erythrozyten kontrolliert werden.

**Hinweise für Verkehrsteilnehmer:**

Bei Patienten, die mit Cyclophosphamid behandelt wurden, sollte wegen möglicher Nebenwirkungen wie Übelkeit, Erbrechen und dadurch möglicherweise auftretender Reaktionschwäche im Einzelfall vom Arzt über die

Januar 2002

0726-044 - Endoxan - 1

3



aktive Teilnahme bei Sanierungsarbeiten oder zum Bedienen von Maschinen einzuweisen werden.

**15. Dauer der Haltbarkeit**

Endoxan® 100 mg, 200 mg, 500 mg und 1 g Injektionsfläschchen sind 3 Jahre haltbar. Endoxan® Dragees sind 5 Jahre haltbar. Die rekonstruierte Lösung sollte nach der Herstellung innerhalb von 24 Stunden verwendet werden (nicht über +8°C lagern).

Endoxan® 100 mg, 200 mg, 500 mg und 1 g Injektionsfläschchen sowie Endoxan® Dragees sollen nach dem auf der Packung angegebenen Verfallsdatum nicht mehr angewendet werden.

**16. Besondere Lager- und Aufbewahrungshinweise**

Endoxan® Injektionsfläschchen und Dragees sollen bei Raumtemperatur nicht über +25°C aufbewahrt werden.

Durch Temperaturschwankungen während des Transportes oder der Lagerung von Endoxan® Trockensubstanzen kann es zum Schmelzen des Wirkstoffes Cyclophosphamid kommen.

Injektionsfläschchen mit geschrobbelter Substanz sind optisch leicht von Flaschen mit kristallinem Wirkstoff zu unterscheiden. Geschrobbeltes Cyclophosphamid ist eine klare oder gelbliche Flüssigkeit, die sich als zusammenhängende Phase oder in Tropfen in den betroffenen Flaschen findet. Injektionsfläschchen mit geschrobbeltem Inhalt dürfen nicht mehr verwendet werden.

Die rekonstruierte Lösung darf nicht über +8°C gelagert werden.

**17. Darreichungsformen und Packungsgrößen**

**Endoxan® 100 mg**  
Packungen mit 1 Injektionsfläsche, Glaspäckungen

**Endoxan® 200 mg**  
Packungen mit 10 Injektionsfläschchen, Glaspäckungen

**Endoxan® 500 mg**  
Packungen mit 1 oder 6 Injektionsfläschchen, Glaspäckungen

**Endoxan® 1 g**  
Packungen mit 1 oder 6 Injektionsfläschchen, Glaspäckungen

**Endoxan®**  
Packungen mit 50 oder 100 Dragees, Glaspäckungen

**18. Stand der Information**

Januar 2002

Dieses Arzneimittel ist nach dem gesetzlichen Übergangsvorschriften in Vertrieb. Die behördliche Prüfung auf pharmazeutische Qualität, Wirksamkeit und Unbedenklichkeit ist noch nicht abgeschlossen.

**19. Name oder Firma und Anschrift des pharmazeutischen Unternehmers**

Baxter Oncology GmbH  
Dialektstraße 40  
60314 Frankfurt  
Telefon: (069) 6685-6000

Zentrale Anfordrung an:

Bundesverband der Pharmazeutischen Industrie e.V.

FachInfo-Service

Postfach 12 65

88222 Aulendorf



## 8.11.5 Fluorouracil

### Fachinformation

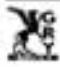

GRY-Pharma GmbH

Fluorouracil-GRY®

250 mg/5 ml, - 500 mg/10 ml, - 1000 mg/20 ml, - 5000 mg/100 ml

#### 1. Bezeichnung der Arzneimittel

##### Fluorouracil-GRY®

250 mg/ 5 ml Injektionslösung  
500 mg/ 10 ml Injektionslösung  
1000 mg/ 20 ml Injektionslösung  
5000 mg/ 100 ml Injektionslösung

Wirkstoff: 5-Fluorouracil

#### 2. Verschreibungszustand/ Apothekenpflicht

Verschreibungspflichtig

#### 3. Zusammensetzung der Arzneimittel

##### 3.1 Stoff- oder Indikationsgruppe

Zytostatikum aus der Gruppe der Antimetaboliten (Pyrimidinanaloga)

##### 3.2 Arzneilich wirksamer Bestandteil

1 Durchstechflasche mit 5 ml Injektionslösung enthält  
250 mg 5-Fluorouracil  
1 Durchstechflasche mit 10 ml Injektionslösung enthält  
500 mg 5-Fluorouracil  
1 Durchstechflasche mit 20 ml Injektionslösung enthält  
1000 mg 5-Fluorouracil  
1 Durchstechflasche mit 100 ml Injektionslösung enthält  
5000 mg 5-Fluorouracil

##### 3.3 Sonstige Bestandteile

Natriumhydroxid, Wasser für Injektionszwecke

#### 4. Anwendungsgebiete

- fortgeschrittenes kolorektales Karzinom
- fortgeschrittenes Magenkarzinom
- fortgeschrittenes Pankreaskarzinom
- fortgeschrittenes und/oder metastasierendes Mammakarzinom

#### 5. Gegenanzeigen

- 5-Fluorouracil darf nicht angewendet werden bei:
- Überempfindlichkeit gegen 5-Fluorouracil,
  - Knochenmarksuppression,
  - schweren Blutbildveränderungen,
  - schweren Leberfunktionsstörungen,
  - akuten Infektionen,
  - Patienten in schlechtem Allgemeinzustand.

Im zeitlichen Zusammenhang mit einer 5-Fluorouracil-Therapie sollten aktive Impfungen nicht durchgeführt werden. Der Kontakt mit Folieimpfungen sollte vermieden werden.

##### Hinweis:

Bei Patienten mit Dihydropyrimidin-Dehydrogenase (DPD)-Mangel verursachen übliche 5-Fluorouracil-Dosen verstärkte Nebenwirkungen. Treten schwere unerwünschte Wirkungen auf, kann eine Kontrolle der DPD-Aktivität angezeigt sein. Patienten mit DPD-Mangel sollten nicht mit 5-Fluorouracil behandelt werden.

5-Fluorouracil darf nicht gleichzeitig mit DPD-Inhibitoren wie Irinotecan verabreicht werden. Zwischen einer Behandlung mit Irinotecan und dem Beginn einer Therapie mit 5-Fluorouracil muss ein zeitlicher Abstand

von mindestens 4 Wochen eingehalten werden (siehe auch Abschnitt 6).

#### Anwendung in Schwangerschaft und Stillzeit

5-Fluorouracil kann erbgutschädigend wirken und darf während der Schwangerschaft und Stillzeit nicht angewendet werden. Frauen im gebärfähigen Alter sollten während der Chemotherapie und bis zu 6 Monaten danach für eine wirksame Empfängnisverhütung sorgen. Tritt während der Behandlung eine Schwangerschaft ein, so ist die Möglichkeit einer genetischen Beratung zu nutzen.

5-Fluorouracil kann erbgutschädigend wirken. Männern, die mit 5-Fluorouracil behandelt werden, wird daher empfohlen, während der Behandlung sowie bis zu 6 Monaten danach kein Kind zu zeugen.

Während der Behandlung darf nicht gestillt werden.

#### Anwendung im Kindesalter:

Zur Wirksamkeit und Unbedenklichkeit von 5-Fluorouracil bei Kindern liegen keine ausreichenden Erfahrungen vor.

#### 6. Nebenwirkungen

##### 6.1 Blut- und blutbildendes System:

Eine Myelosuppression tritt häufig auf und ist eine der dosislimitierenden Nebenwirkungen (siehe auch unter „14. Sonstige Hinweise“ und „10. Dosierung“). Neutropenien und Thrombocytopenien reichen bis schwersten Grades, Agnucytose, Anämie und Pancytopenie wurden beschrieben.

Das Ausmaß (NCI-Grad I-IV) der Myelosuppression ist abhängig von der Applikationsart (iv-Bolusinjektion oder iv-Dauerinfusion) und der Dosierung.

Eine Neutropenie tritt nach jedem Behandlungskurs mit iv-Bolusinjektionen bei adäquater Dosierung auf (Nadir: 9-14 [-20] Behandlungstag, Normalwerte: i. d. R. nach dem 20. Tag).

##### 6.2 Verdauungstrakt:

Gastrointestinale Nebenwirkungen treten häufig auf und können lebensbedrohend sein.

Mukositis (Stomatitis, Ösophagitis, Proktitis), wässrige Diarrhoe, Übelkeit und Erbrechen reichen bis schwersten Grades und sterile Cholezystitis wurden beschrieben (siehe auch unter „14. Sonstige Hinweise“). Der Schweregrad (NCI-Grad I-IV) gastrointestinaler Nebenwirkungen ist abhängig von der Dosierung und der Applikationsart. Bei iv-Dauerinfusion erwies sich eher die Stomatitis als die Myelosuppression als dosislimitierend.

Dehydratation, Sepsis sowie Übelkeit und Blutungen im Magen-Darm-Bereich werden selten beobachtet.

Selten wurden Leberfunktionsstörungen und in Einzelfällen Lobemkrosen beobachtet, die teilweise fatal verlaufen.

##### Hinweis:

Solange Entzündungen, Geschwüre oder Durchfälle (Diarrhoe) bestehen, sollte auf die Anwendung von 5-Fluorouracil verzichtet werden.

##### 6.3 Anaphylaktische Reaktionen:

Generalisierte allergische Reaktionen bis zum anaphylaktischen Schock können auftreten.

##### 6.4 Kardiovaskuläres System:

Kardotoxische Nebenwirkungen treten meist während oder wenige Stunden nach dem ersten Anwendungszyklus auf. Im EKG zeigen sich häufig ischämietypische Veränderungen. Angina pectoris-ähnliche Brustschmerzen treten gelegentlich auf. Seltener wurden Rhythmusstörungen, Myokardinfarkt, Myokarditis, Herzinsuffizienz, dilative Kardiomyopathie und kardiogener Schock sowie in Einzelfällen Herztotstand und plötzlicher Herztod beobachtet. Für Patienten mit vorbestehender koronarer Herzkrankheit oder Kardiomyopathie besteht ein erhöhtes Risiko, kardotoxische Nebenwirkungen zu entwickeln.

Das Auftreten von Thrombophlebitiden wurde beschrieben.

##### 6.5 Nervensystem und Sinnesorgane:

Nystagmus, Kopfschmerzen, Schwindel, Parkinson-Symptome, Pyramidenbahnzeichen und Epilepsie können selten auftreten. In Einzelfällen können nach Injektion hoher 5-Fluorouracil-Dosen bzw. bei Patienten mit Dihydropyrimidin-Dehydrogenase-Mangel (Leuko-Enzephalopathie mit Symptomen wie Ataxie, Sprachstörungen, Verwirrtheit, Orientierungsstörungen, Muskelschwäche, Aphasie, Krampfanfälle oder Koma auftreten).

Übermäßiger Tränenfluss, verschwommenes Sehen, Säugungen der Augenmuskulatur, Optikusneuritis, Diplopie, Visusminderung, Photophobie, Konjunktivitis, Blepharitis, narbenbedingtes Exotropium und Fibrosen des Tränenkanals können selten auftreten.

##### 6.6 Haut- und Hautanhangsgebilde:

Das sogenannte „Hand-Fuß-Syndrom“ (hand-foot syndrome) mit Dysästhesien sowie Rötung, Schwellung, Schmerzen und Abschuppung der Haut an Handflächen und Fußsohlen tritt nach iv-Dauerinfusion häufiger als nach iv-Bolusinjektionen auf.

Exantheme, tockere Haut mit Fissuren, Dermatitis, Ulkula, Photosensibilisier, Hyperpigmentierung der Haut und streifenförmige Hyperpigmentierung oder Pigmentverlust im Bereich des Venenverlaufs können selten auftreten.

Nagelveränderungen (z. B. diffuse oberflächliche blaue Pigmentierung, Hyperpigmentierung, Nageldystrophie, Schmerzen und Verdickung des Nagelbettes, Paronychie) und Onycholyse treten selten auf.

Eine Alopezie tritt häufig auf.

##### 6.7 Endokrinologische Nebenwirkungen:

Anstieg des Gesamt-Thyroxins ( $T_4$ ) und Gesamt-Trijodthyronins ( $T_3$ ) im Serum ohne Anstieg des freien  $T_4$  und des TSH und ohne klinische Zeichen einer Hyperthyreose.

##### 6.8 Sonstige Nebenwirkungen:

Immunsuppression mit erhöhter Infektionsrate, verzögerte Wundheilung, Epistaxis, Hyperurikämie, Bronchospasmen, Abgeschlagenheit, allgemeine Schwäche, Müdigkeit und Antriebslosigkeit treten häufig auf.

Februar 2003

1981-605 - Fluorouracil-GRY - 1

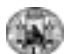

SUCCESS-Trial, Version 1.2, 15.8.2005

Anschrift: D-80337 München • Maistraße 11 • Telefon (0 89) 51 60-4111 (Vermittlung)

Page 188



**Fluorouracil-GRY®**

250 mg/5 ml, - 500 mg/10 ml, - 1000 mg/20 ml, - 5000 mg/100 ml

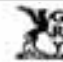

GRY-Pharma GmbH

**Auswirkungen auf die Fähigkeit, Kraftfahrzeuge zu führen und Maschinen zu bedienen:**

5-Fluorouracil kann durch Übelkeit und Erbrechen indirekt zu einer Beeinträchtigung der Fähigkeit oder der Fähigkeit zur Bedienung von Maschinen führen. Daher sollte während der Behandlung mit 5-Fluorouracil das Führen von Kraftfahrzeugen und das Bedienen von Maschinen unterlassen werden.

**7. Wechselwirkungen mit anderen Mitteln**

Alle Behandlungsmaßnahmen, die den Allgemeinzustand des Patienten verschlechtern oder die Knochenmarksfunktionen beeinträchtigen (z. B. andere Zytostatika), können die Toxizität von 5-Fluorouracil erhöhen. 5-Fluorouracil kann die kutane Toxizität von Strahlentherapien verstärken.

Calciumfolinat verstärkt die Wirkung von 5-Fluorouracil. Als klinische Folge dieser Wechselwirkung können schwerwiegende, z. T. letal verlaufende Darmerkrankungen auftreten. Eine Häufung dehydratisierter Todesfälle wurde insbesondere bei einem Applikationschema von wöchentlich einmal einem iv.-Bolus von 400 mg/m<sup>2</sup> Körperoberfläche 5-Fluorouracil in Kombination mit Calciumfolinat berichtet.

Bzüglich der Wechselwirkung mit DPD-Inhibitoren wie Brivudin siehe die Abschnitte 5 und 8.

Cimetidin, Nitroimidazol und Interferone können den Plasmaspiegel von 5-Fluorouracil erhöhen. Das kann die toxischen Wirkungen von 5-Fluorouracil verstärken.

Bei Patientinnen, die zusätzlich zu Cyclophosphamid, Methotrexat und 5-Fluorouracil ein Diuretikum vom Thiazid-Typ erhalten, sinkt die Gesamtzylinderzahl stärker als nach gleichen Zytostatika-Zyklen ohne Thiazid.

In Einzelblut wurde bei mit Wafarin behandelten Patientinnen, die zusätzlich 5-Fluorouracil allein oder in Kombination mit Levamisol erhalten, ein Abfall des Quick-Wertes beobachtet.

Unter Behandlung mit 5-Fluorouracil und Levamisol werden häufig hepatoxische Wirkungen (Anstieg von alkalischer Phosphatase, Transaminasen oder Bilirubin) beobachtet.

Bei Patientinnen mit Mammakarzinom, die eine Kombinationsbehandlung mit Cyclophosphamid, Methotrexat, 5-Fluorouracil und Tamoxifen erhalten, zeigte sich ein erhöhtes Risiko für das Auftreten thromboembolischer Ereignisse.

Bei gleichzeitiger Gabe von Vinorebin und 5-Fluorouracil/Folinsäure können schwere Mukosiden mit Toxisolge auftreten.

Die Nachweismethoden für Bilirubin und für 5-Hydroxyindolesulfonate im Harn können erhöhte oder falsch-positive Werte ergeben.

**Allgemeine Hinweise:**

Zytostatika können die Antikörperbildung nach Influenzimpfung mindern.

Zytostatika können das Risiko einer Infektion nach Lebendimpfung erhöhen.

**8. Warnhinweise**

Patienten mit DPD-Mangel sollten nicht mit 5-Fluorouracil behandelt werden, immer darf 5-Fluorouracil nicht gleichzeitig mit DPD-Inhibitoren wie Brivudin verabreicht werden. Die Dihydropyrimidin-Dehydrogenase (DPD) ist ein Enzym, das den Metabolismus sowohl von natürlichen Nucleosiden (z. B. Thymin) als auch von Pyrimidin-Derivaten wie 5-Fluorouracil reguliert. Der Mangel oder die Hemmung dieses Enzyms führt zu einer Akkumulation und verstärkter Toxizität von 5-Fluorouracil.

Brivudin hemmt durch seinen Hauptmetaboliten Bernivynuracil die DPD irreversibel. Zwischen einer Behandlung mit Brivudin und dem Beginn einer Therapie mit 5-Fluorouracil muss daher ein zeitlicher Abstand von mindestens 4 Wochen eingehalten werden. Als eine zusätzliche Vorsichtsmaßnahme sollte bei Patienten, die vor kurzem mit Brivudin behandelt wurden, die DPD-Enzymaktivität ermittelt werden, bevor mit der 5-Fluorouracil-Behandlung begonnen wird. Im Falle einer versehentlichen Verabreichung von Brivudin an Patienten, die mit 5-Fluorouracil behandelt werden, sollten wirkungsvolle Maßnahmen zur Reduzierung der 5-Fluorouracil-Toxizität ergriffen werden. Es wird die sofortige Einweisung ins Krankenhaus empfohlen. Alle Maßnahmen zur Verhütung systemischer Infektionen und einer Dehydratation sollten eingeleitet werden.

**9. Wichtige Inkompatibilitäten**

5-Fluorouracil darf nur mit physiologischer Kochsalzlösung oder 5%iger Glukoselösung vermischt werden.

5-Fluorouracil darf nicht mit anderen Substanzen in einer Infusion gemischt werden.

Über Inkompatibilitäten mit folgenden Substanzen wurde berichtet: Caspofungin, Cytarabine, Doxorubicin, Leucovorin, Methotrexat, Vinorebin, Diazepam, Droperidol, Filgrastim, Galliumnitrat, Melociclopamid, Mophrin, Ondansetron, parenterale Ernährungslösungen.

**10. Dosierung**

Die Behandlung mit 5-Fluorouracil sollte nur durch Ärzte erfolgen, die in der Tumorthese erfahren sind. Während der Initialphase sollte eine Hospitalisierung des Patienten erwogen werden.

5-Fluorouracil wird in der Monotherapie sowie als Bestandteil einer Polychemotherapie angewendet. Da die Applikationsweise und Dosierungsempfehlungen für 5-Fluorouracil stark variieren, können nur allgemeine Richtwerte angegeben werden.

Die exakte Dosierung ist Befolgung der Protokolle zu entnehmen, die sich in der Therapie der jeweiligen Erkrankung als wirksam erwiesen haben.

**fortgeschrittenes kolorektales Karzinom:** Als Monotherapie oder im Rahmen einer Polychemotherapie in Tageseinzeldosen von 370–600 mg/m<sup>2</sup> Körperoberfläche (KOF) als iv.-Bolusinjektion bzw. von 300–750 mg/m<sup>2</sup>KOF als iv.-Dauerinfusion.

**fortgeschrittenes Magenkarzinom:**

Als Monotherapie oder im Rahmen einer Polychemotherapie in Tageseinzeldosen von 500–600 mg/m<sup>2</sup> KOF als iv.-Bolusinjektion.

**fortgeschrittenes Pankreaskarzinom:**

Als Monotherapie in Tageseinzeldosen von 400–500 mg/m<sup>2</sup> KOF als iv.-Bolusinjektion bzw. von 1000 mg/m<sup>2</sup> KOF als iv.-Dauerinfusion.

**metastasiertes Mammakarzinom:**

Im Rahmen einer Polychemotherapie in Tageseinzeldosen von 500–600 mg/m<sup>2</sup> KOF iv. angewendet (z. B. CMF, FAC).

**Absetzen der Therapie, Dosisreduktion:**

Bei Auftreten folgender toxischer Symptome ist die Behandlung mit 5-Fluorouracil sofort abzubrechen:

- Leukozytopenie (< 2000/µl)
- Thrombozytopenie (< 50 000/µl)
- Stomatitis, Dysphagie,
- Erbrechen, das durch die Gabe eines Antiemetikums nicht zu beheben ist,
- Darmerkrankung,
- Übelkeit und Blutungen im Magen-Darm-Bereich,
- sonstige Hämorrhagien,
- neurotoxische Störungen,
- kardiotokische Störungen.

Nach Wiederanstieg der Leukozyten ( $\geq 3000/\mu\text{l}$ ) bzw. der Thrombozyten ( $\geq 70 000/\mu\text{l}$ ) kann die Behandlung mit einer ggf. reduzierten Dosis wieder aufgenommen werden (siehe Tabelle), sofern nicht andere Nebenwirkungen (s. o.) einer Wiederaufnahme der Behandlung entgegenstehen.

| Leukozyten/µl | Thrombozyten/µl | Dosis |
|---------------|-----------------|-------|
| > 4000        | > 100 000       | 100%  |
| 3000–4000     | 70 000–100 000  | 75%   |
| 2000–3000     | 50 000–70 000   | 50%   |
| < 2000        | < 50 000        | STOP! |

Bei gestörter Leber- oder Nierenfunktion sind keine Dosisreduktionen erforderlich. Nur im Fall einer gleichzeitig gestörten Leber- und Nierenfunktion sollten Dosisreduktionen erwogen werden, in schweren Fällen um ein Drittel bis um die Hälfte.

**11. Art und Dauer der Anwendung**

Fluorouracil-GRY® 250 mg/5 ml, - 500 mg/10 ml, - 1000 mg/20 ml, - 5000 mg/100 ml wird intravenös als Bolus oder Dauerinfusion appliziert.

Die Anwendungsrichtlinien sind genau zu beachten.

Über die Dauer der Anwendung entscheidet der behandelnde Arzt. Sie richtet sich nach dem Behandlungsprotokoll. Die Gabe von 5-Fluorouracil muß streng intravenös erfolgen.

Die Therapie sollte abgesetzt werden bei Nichtansprechen des Tumors, progressiver Erkrankung sowie bei Auftreten unerwünschter Wirkungen, die einer Weiterführung der Therapie entgegenstehen.



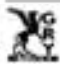

**Vorsichtsmaßnahmen im Umgang mit und bei der Anwendung von 5-Fluorouracil**

Wegen der potentiell mutagenen und teratogenen Wirkung gelten für das Pflegepersonal und die Ärzte erhöhte Sicherheitsvorschriften. Beim Umgang mit 5-Fluorouracil ist jeder Kontakt mit der Haut und den Schleimhäuten zu vermeiden. Die Zubereitung muß mit Hilfe eines absolut aseptischen Arbeitsverfahrens erfolgen. Die Verwendung einer Werkbank mit vertikaler Luftströmung (LAF) wird empfohlen. Beim Umgang mit 5-Fluorouracil muß Schutzkleidung getragen werden. Schwängere Personal ist vom Umgang mit 5-Fluorouracil auszuschließen.

**12. Notfallmaßnahmen, Symptome und Gegenmittel**

**Symptome der Intoxikation**

Als Folge einer Überdosierung treten meist folgende Nebenwirkungen verstärkt auf: Übelkeit, Erbrechen, Diarrhoe, schwere Schleimhautreizungen, Ulcerationen und Blutungen im Magen-Darm-Bereich, Knochenmarkdepression (Thrombozytopenie, Leukozytopenie, Agranulozytose).

**Therapie von Intoxikationen**

Bei Auftreten von Intoxikationserscheinungen sollte die Applikation von 5-Fluorouracil sofort abgebrochen werden. Es sind symptomatische Behandlungsmaßnahmen anzuknüpfen. Die Therapie einer ausgeprägten Myelosuppression muß unter stationären Bedingungen erfolgen. Sie besteht unter Umständen in der Substitution der fehlenden Blutbestandteile und antidiätischer Therapie. Die Verlegung des Patienten in einen keimfreien Raum kann notwendig werden. Ein spezifisches Antidot steht nicht zur Verfügung. Hämatologische Kontrollen sollten bis 4 Wochen nach einer Überdosierung erfolgen.

**13. Pharmakologische und toxikologische Eigenschaften, Pharmakokinetik und Bioverfügbarkeit, soweit diese Angaben für die therapeutische Verwendung erforderlich sind**

**13.1 Pharmakologische Eigenschaften**

5-Fluorouracil ist ein selbst nicht antineoplastisch wirksames, synthetisches, flüchtiges Pyrimidinderivat. Die Hemmung der Zellteilung erfolgt nach Metabolisierung durch die aktiven Metaboliten 5-Fluoruridintriphosphat (FUTP) und 5-Fluorodesoxyuridintriphosphat (FdUMP).

**Bekannte Wirkmechanismen:**

- Blockade der DNS-Synthese (Hemmung der Thymidat-Synthetase durch FdUMP).
- Hemmung der FINS-Synthese (Bildung liefert struktureller FINS durch Einbau von FUTP).
- DNS-Strangbrüche nach Einbau von Fluorodesoxyuridintriphosphat (phosphoryliertes FdUMP) in die DNS.

Die Hemmwirkte zeigen sich vor allem in Zellen, die schnell wachsen und so in höherem Umfang 5-Fluorouracil aufnehmen.

**13.2 Toxikologische Eigenschaften**

**Akute Toxizität**

Vgl. unter 12. „Notfallmaßnahmen, Symptome und Gegenmittel“.

**Chronische Toxizität**

5-Fluorouracil wirkt bevorzugt auf proliferierende Zellen, daher kommt es vor allem zu Knochenmarkdepression und Schäden an der Schleimhaut des Gastrointestinaltraktes.

**Mutagenes und tumorerzeugendes Potential**

5-Fluorouracil erwies sich in verschiedenen Tests zur Mutagenität *in vitro* und *in vivo* als mutagener Wirkstoff. Es besteht der Verdacht auf eine mutagene Wirkung im Menschen.

Aus Tierversuchen mit 5-Fluorouracil liegen keine Hinweise auf eine tumorerzeugende Wirkung vor. 5-Fluorouracil gehört jedoch in eine Substanzklasse, die tumorerzeugende Effekte erwarten läßt.

**Reproduktionstoxizität**

Untersuchungen zur Fertilität und Teratogenität an verschiedenen Tierarten ergaben Hinweise auf ein embryotoxisches und teratogenes Potential sowie auf eine Beeinträchtigung der Fertilität und des Reproduktionsverhaltens.

**13.3 Pharmakokinetik**

**Halbwertszeit**

Nach intravenöser Applikation von 5-Fluorouracil (5-FU) beträgt die (monoexponentielle) Eliminationshalbwertszeit 10-20 Minuten und ist dosisabhängig; über eine biphasische Halbwertszeit von 8 bzw. 40 Minuten wurde berichtet. 3 Stunden nach Applikation sind 5-FU-Plasmaspiegel nicht mehr meßbar.

**Verteilung**

Die Verteilung entspricht der gesamten Körperflüssigkeit. 5-Fluorouracil penetriert die Blut-Liquor-Schranke.

**Metabolismus**

Ca. 85% der applizierten Dosis werden metabolisiert. Aktive Metaboliten sind das intrazellulär gebildete 5-Fluoruridintriphosphat (FUTP) und 5-Fluorodesoxyuridintriphosphat (FdUMP). Neben den aktiven Metaboliten wird 5-FU hauptsächlich in der Leber zu inaktiven Metaboliten (Hauptmetaboliten: 5-Fluoruridin, 5-Fluorodesoxyuridin) umgewandelt und zu Uracil katabolisiert. Kohlendioxid, Harnstoff und andere Metaboliten entstehen ebenfalls.

**Ausscheidung**

15% der applizierten Menge werden innerhalb von 6 Stunden unverändert renal ausgeschieden, davon ca. 90% innerhalb der ersten Stunde.

**14. Sonstige Hinweise**

Schädigungen der Darmwand erfordern eine dem Schweregrad entsprechende symptomatische Behandlung z. B. Flüssigkeitsersatz. Leichte Diarrhoe kann auf Antidiarrhoika ansprechen. Bei mäßiger bis schwerer Diarrhoe reichen sie jedoch nicht aus.

Vor und während der Therapie mit 5-Fluorouracil werden folgende Verkaufsuntersuchungen empfohlen:

- tägliche Inspektion der Mundhöhle und des Pharynx auf Schleimhautveränderungen,
- Blutbild einschließlich Differentialblutbild und Thrombozyten vor jeder 5-Fluorouracil-Applikation,
- Renalionswerte,
- Leberwerte.

Bei gleichzeitiger Anwendung von 5-Fluorouracil und oralen Antikoagulantien ist der Quick-Wert engmaschig zu kontrollieren.

**15. Dauer der Haltbarkeit**

2 Jahre

**16. Besondere Lager- und Aufbewahrungshinweise**

Fluorouracil-GFR® 250 mg/5 ml, - 500 mg/10 ml, - 1000 mg/20 ml, - 5000 mg/100 ml, Injektionslösung, muß vor Licht geschützt zwischen +15°C und +25°C aufbewahrt werden.

Bei Lagerung unterhalb von +15°C ist die Bildung/Ausbildung von Kristallen möglich. Diese können aber durch Erwärmen auf +60°C in Wasserbad und kräftiges Schütteln wieder in Lösung gebracht werden; die Qualität des Produktes wird dadurch nicht beeinträchtigt.

Vor der Injektion auf Körpertemperatur abkühlen lassen.

Nukleäre Lösungen anwenden. Trübe Lösungen oder solche, die einen Niederschlag zeigen, sind von der Anwendung auszuschließen.

**Haltbarkeit nach Öffnen des Behältnisses und nach Herstellung der gebrauchsfähigen Injektionslösung**

Die durch Verdünnen von Fluorouracil-GFR® 250 mg/5 ml, - 500 mg/10 ml, - 1000 mg/20 ml, - 5000 mg/100 ml bereitgestellten gebrauchsfähigen Fluorouracil-Lösungen sind unter Lichtschutz bei Raumtemperatur 48 Stunden stabil.

Einmalbebehältnis, Restmenge verwerten!

**Arzneimittel unzugänglich für Kinder aufbewahren!**

**Arzneimittel nach Ablauf des Verfaltdatums nicht mehr anwenden!**

**Einbergungsvorschriften für Zytostatika sind zu beachten!**

**17. Darreichungsform und Packungsgrößen**

1 Durchstechflasche mit 250 mg/5 ml Injektionslösung [1,1]  
10 Durchstechflaschen (Bündelpackung) mit je 250 mg/5 ml Injektionslösung [1,2]

1 Durchstechflasche mit 500 mg/10 ml Injektionslösung [1,1]  
10 Durchstechflaschen (Bündelpackung) mit je 500 mg/10 ml Injektionslösung [1,2]

Februar 2003

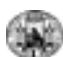

**Fluorouracil-GRY®**

250 mg/5 ml, - 500 mg/10 ml, - 1000 mg/20 ml, - 5000 mg/100 ml

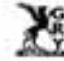

**GRY-Pharma GmbH**

1 Durchstechflasche mit 1000 mg/20 ml Injektionslösung [N1]  
10 Durchstechflaschen (Einzelpackung) mit je 1000 mg/20 ml Injektionslösung [N2]  
1 Durchstechflasche mit 5000 mg/100 ml Injektionslösung [N1]  
10 Durchstechflaschen (Einzelpackung) mit je 5000 mg/100 ml Injektionslösung [N2]

**18. Stand der Information**

Februar 2003

**19. Name oder Firma und Anschrift des pharmazeutischen Unternehmens**

GRY-Pharma GmbH  
Kardelenstraße 10  
D-75199 Kirchzarten  
Telefon: (076 61) 99 45-01  
Telefax: (076 61) 71 59

Zentrale Anbindung an:

BPI Service GmbH

FachInfo-Service

Postfach 12 55

88322 Aulendorf





## 8.11.6 Anastrozole

Fachinformation (Zusammenfassung der Produkteigenschaften/SPC)

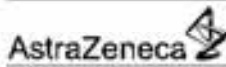

AstraZeneca Form 22576/2004

# Arimidex® 1 mg Filmtabletten

### 1. Bezeichnung des Arzneimittels

Arimidex® 1 mg Filmtabletten  
Wirkstoff: Anastrozol

### 2. Qualitative und quantitative Zusammensetzung

1 Filmtablette enthält 1 mg Anastrozol.  
Sonstige Bestandteile siehe unter 6.1.

### 3. Darreichungsform

Filmtablette

### 4. Klinische Angaben

#### 4.1 Anwendungsgebiete

Behandlung des fortgeschrittenen Mammakarzinoms bei postmenopausalen Frauen. Bei Patientinnen mit östrogenrezeptor positiven Tumoren ist die Wirksamkeit von Arimidex bisher nicht belegt, es sei denn, die Patientinnen haben zuvor bereits auf Tamoxifen angesprochen.

Adjunkte Behandlung postmenopausaler Frauen mit östrogenrezeptor positiven, nicht fortgeschrittenen, invasiven Mammakarzinomen, die aufgrund eines erhöhten Risikos für Knochenbrüchen oder wegen Veränderungen des Endometrium nicht mit Tamoxifen behandelt werden können.

#### 4.2 Dosierung,

##### Art und Dauer der Anwendung

Erwachsene, einschließl. älterer Patientinnen:  
Einmal täglich eine Filmtablette Arimidex 1 mg.

**Kinder:**  
Kinder sollten nicht mit Arimidex behandelt werden.

**Eingeschränkte Nierenfunktion:**  
Für Patientinnen mit leichten bis mäßigen Nierenfunktionsstörungen ist keine Dosisanpassung erforderlich.

**Eingeschränkte Leberfunktion:**  
Für Patientinnen mit leichten Leberfunktionsstörungen ist keine Dosisanpassung erforderlich.

Bei der adjunkten Behandlung des nicht fortgeschrittenen Mammakarzinoms wird eine Behandlungsdauer von 5 Jahren empfohlen.

#### 4.3 Gegenanzeigen

- Arimidex ist kontraindiziert bei
- prämenopausalen Frauen,
  - schwangeren und stillenden Frauen,
  - Patientinnen mit schwerer Nierenfunktionsstörung (Kreatinin Clearance <20 ml/min),
  - Patientinnen mit mäßigen oder schweren Leberfunktionsstörungen,
  - Patientinnen mit bekannter Überempfindlichkeit gegen Anastrozol oder einen der unter 6.1 angegebenen sonstigen Bestandteile.

Östrogenhaltige Arzneimittel sollten nicht zusammen mit Arimidex verabreicht werden, da sie dessen pharmakologische Wirkung aufheben. Gleichzeitige Behandlung mit Tamoxifen (siehe Abschnitt 4.5).

#### 4.4 Warnhinweise und Vorsichtsmaßnahmen für die Anwendung

Arimidex sollte nicht zur Behandlung von Kindern eingesetzt werden, da Wirksamkeit und Unbedenklichkeit bei dieser Patientengruppe nicht nachgewiesen worden sind.

Bei Patientinnen, deren Hormonstatus nicht eindeutig ist, sollte die Menopause durch Hormonstatusmessungen bestätigt werden.

Für Patientinnen mit mäßiger oder schwerer Leberfunktionsstörung oder Patientinnen mit schwerer Nierenfunktionsstörung (Kreatinin Clearance <20 ml/min) liegen keine Daten vor, die eine sichere Anwendung von Arimidex belegen.

Bei Frauen mit Osteoporose oder mit einem Osteoporoseisiko sollte zu Beginn der Behandlung und anschließend in regelmäßigen Abständen die Knochendichte, z. B. durch die DXA-Scannmethode, bestimmt werden. Dementsprechend sollte eine Behandlung oder Prophylaxe der Osteoporose begonnen und sorgfältig überwacht werden.

Es stehen keine Daten über die gleichzeitige Anwendung von Anastrozol und HFRH-Arzneimitteln zur Verfügung. Diese Kombinationsbehandlung sollte aufgrund von klinischen Prüfungsabbrüchen abgewiesen werden.

Da Arimidex die endogenen Östrogenpiegel senkt, kann Arimidex eine Reduktion der Knochendichte hervorrufen.

#### 4.5 Wechselwirkungen mit anderen Arzneimitteln und sonstige Wechselwirkungen

Ergebnisse von Interaktionsstudien mit Phenazon und Cimetidin deuten darauf hin, dass bei der gleichzeitigen Verabreichung von Arimidex und anderen Arzneimitteln keine klinisch relevanten, durch Cytochrom P-450 vermittelten Wechselwirkungen zu erwarten sind.

Die Auswertung sicherheitsrelevanter Daten aus klinischen Studien ergab ebenfalls keine Hinweise auf klinisch signifikante Wechselwirkungen bei Patientinnen, die gleichzeitig mit Arimidex und anderen üblicherweise verwendeten Arzneimitteln behandelt wurden.

Östrogenhaltige Arzneimittel sollten nicht zusammen mit Arimidex verabreicht werden, da sie dessen pharmakologische Wirkung aufheben. Tamoxifen sollte nicht zusammen mit Arimidex angewendet werden, da dessen pharmakologische Wirkung verringert werden kann (siehe Abschnitt 4.3).

#### 4.6 Anwendung während Schwangerschaft und Stillzeit

Arimidex ist bei schwangeren und stillenden Frauen kontraindiziert.

#### 4.7 Auswirkungen auf die Verkehrstüchtigkeit und das Bedienen von Maschinen

Es ist unwahrscheinlich, dass Arimidex die Fähigkeit, ein Fahrzeug zu führen oder Maschinen zu bedienen, beeinträchtigt. Während der Behandlung mit Arimidex wurden jedoch Schwächegefühl und Schwindel beobachtet, und solange diese Symptome bestehen, ist beim Führen von Fahrzeugen oder beim Bedienen von Maschinen Vorsicht geboten.

#### 4.8 Nebenwirkungen

Siehe Tabelle Seite 2.

Da Arimidex die endogenen Östrogenpiegel senkt, kann Arimidex eine Reduktion der Knochendichte hervorrufen und für einige Patientinnen das Risiko für Knochenbrüche erhöhen (siehe Abschnitt 4.4).

Erhöhte Werte der Gamma-GT und der alkalischen Phosphatase wurden gelegentlich (>0,3 % und <1 %) beobachtet. Ein uterischer Zusammenhang zwischen diesen Veränderungen und der Behandlung mit Arimidex ist nicht nachgewiesen.

#### 4.9 Überdosierung

Bisher liegen keine klinische Erfahrungen mit versehentlichem Überdosierung vor. In Tierversuchenergebnissen zeigte sich die akute Toxizität von Anastrozolat gering.

In klinischen Studien mit Arimidex in verschiedenen Dosierungen wurden gesunden männlichen Probanden Einzeldosen von bis zu 60 mg und postmenopausalen Frauen mit fortgeschrittenen Mammakarzinomen von bis zu 10 mg täglich verabreicht; diese Dosierungen wurden gut vertragen. Eine Einzel-dosis Arimidex, die lebensbedrohliche Symptome zur Folge hat, ist nicht bekannt. Es gibt kein spezifisches Antidot, so dass die Behandlung symptomatisch erfolgen muss.

Bei der Behandlung einer Überdosierung muss die Möglichkeit in Betracht gezogen werden, dass mehrere Arzneimittel eingenommen wurden. Wenn die Patientin bei Bewusstsein ist, sollte Erbrechen ausgelöst werden. Da Arimidex keine hohe Proteinbindung besitzt, kann eine Dialyse von Nutzen sein. Darüber hinaus sind allgemeine unterstützende Maßnahmen wie häufige Kontrollen der Vitalfunktionen und eine enge Überwachung der Patientin angelegt.

### 5. Pharmakologische Eigenschaften

#### 5.1 Pharmakodynamische Eigenschaften

ATC-Klassifizierung: L02B CD3 (Endryminklassen)

Arimidex ist ein potenter, hoch selektiver, nichtsteroidaler Aromataseinhibitor. Bei postmenopausalen Frauen wird Östadiol hauptsächlich im peripheren Gewebe durch eine von der Aromatase katalysierte enzymatische Umwandlung von Androstendion zu Östren gebildet. Anschließend wird Östren in Östadiol umgewandelt. Bei Frauen mit Brustkrebs ist der Nutzen einer Verhinderung von zirkulierendem Östadiol im Plasma erwiesen. Mit Hilfe einer hoch empfindlichen Methode wurde nachgewiesen, dass die tägliche Gabe von 1 mg Arimidex den Östadiolspiegel bei postmenopausalen Frauen um mehr als 80 % senkt.

Arimidex besitzt keine gestagene, androgene oder östrogene Wirkung.

Messungen vor und nach einem ACTH-Belastungstest zeigen, dass Dosen von bis zu 10 mg Arimidex pro Tag keinen Einfluss auf die Bildung von Cortisol und Androstanon haben. Eine Substitution von Kortikoiden ist daher nicht erforderlich.

1000  
Juli 2004

800 900 - Arimidex 1 mg Filmtablette - 6



SUCCESS-Trial, Version 1.2, 15.8.2005

Anschrift: D-80337 München • Maistraße 11 • Telefon (0 89) 51 60-4111 (Vermittlung)

Page 192

# Arimidex® 1 mg Filmtabletten

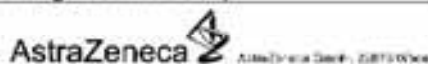

|                                     |                                                                                                                                                             |                                                                                                                                                                                                                                                                                                                                                                                                                                                |
|-------------------------------------|-------------------------------------------------------------------------------------------------------------------------------------------------------------|------------------------------------------------------------------------------------------------------------------------------------------------------------------------------------------------------------------------------------------------------------------------------------------------------------------------------------------------------------------------------------------------------------------------------------------------|
| Sehr häufig<br>(≥ 10 %)             | Gefäße:                                                                                                                                                     | • Hitzeintoleranz, überwiegend leicht oder mäßig ausgeprägt                                                                                                                                                                                                                                                                                                                                                                                    |
| Häufig<br>(≥ 1 % und < 10 %)        | Allgemein:<br>Skelettmuskulatur, Bindegewebe und Knochen:<br>Geschlechtsorgane und Brust:<br>Haut und Subkutargewebe:<br>Magen-Darm-Trakt:<br>Nervensystem: | • Asthenie, überwiegend leicht oder mäßig ausgeprägt<br>• Gelenkschmerzen/ steifheit, überwiegend leicht oder mäßig ausgeprägt<br>• trockene Schleimhäute, überwiegend leicht oder mäßig ausgeprägt<br>• Hautausschlag, überwiegend leicht oder mäßig ausgeprägt<br>• Übelkeit, überwiegend leicht oder mäßig ausgeprägt<br>• Durchfall, überwiegend leicht oder mäßig ausgeprägt<br>• Kopfschmerzen, überwiegend leicht oder mäßig ausgeprägt |
| Gelegentlich<br>(≥ 0,1 % und < 1 %) | Geschlechtsorgane und Brust:<br>Metabolismus und Ernährung:<br>Magen-Darm-Trakt:<br>Nervensystem:                                                           | • Vaginabläutungen, überwiegend leicht oder mäßig ausgeprägt*<br>• Anorexie, überwiegend leicht oder mäßig ausgeprägt<br>• Hypochloridämie, überwiegend leicht oder mäßig ausgeprägt<br>• Erbrechen, überwiegend leicht oder mäßig ausgeprägt<br>• Schwindel, überwiegend leicht oder mäßig ausgeprägt                                                                                                                                         |
| Sehr selten<br>(< 0,01 %)           | Haut und Subkutargewebe:                                                                                                                                    | • Erythema multiforme<br>• Stevens-Johnson-Syndrom<br>• Allergische Reaktionen, darunter Angioödem, Urtikaria und Anaphylaxie                                                                                                                                                                                                                                                                                                                  |

\* Gelegentlich wurde von Vaginabläutungen berichtet, und zwar vor allem bei Patientinnen mit fortgeschrittenen Metastasen. In den ersten Wochen, nachdem die Patientinnen von einer bestehenden Hormontherapie auf Arimidex umgestellt wurden, wenn solche Blütungen auftraten, sollte eine weitere Abklärung erfolgen.

In einer großen klinischen Phase III-Studie an 5388 postmenopausalen Patientinnen mit einem nicht fortgeschrittenen, invasiven Mammakarzinom war die adjuvante Behandlung mit Arimidex nach einer Operation der Behandlung mit Tamoxifen für den primären Endpunkt Zeit bis zum Wiederauftreten der Erkrankung statistisch überlegen. Aufgrund der noch zu geringen Nachbeobachtungszeit kann noch nicht beurteilt werden, in welchem Ausmaß der positive Effekt von Arimidex langfristig erhalten bleibt und ob sich daraus für Arimidex ein Überlebensvorteil ergeben wird. Dazwischen ist nicht bekannt, ob sich durch die zusätzliche Gabe von Arimidex zu einer Chemotherapie ein Überlebensvorteil wie bei der zusätzlichen Gabe von Tamoxifen ergibt. Die Langzeitverträglichkeit von Arimidex ist noch nicht bekannt.

Die Wirksamkeit und Verträglichkeit waren, unabhängig vom Hormonrezeptorstatus der Patientinnen, bei der gleichzeitigen Anwendung von Arimidex und Tamoxifen ähnlich wie bei der alleinigen Gabe von Tamoxifen. Wie dies zuzufügen kommt, ist noch nicht klar. Es wird nicht angenommen, dass eine Verengung des östrogenrezeptorbindenden Wirkung von Arimidex die Ursache ist.

### 5.2 Pharmakokinetische Eigenschaften

Arimidex wird nach oraler Gabe schnell absorbiert und maximale Plasmaspiegel werden üblicherweise innerhalb von 2 Stunden (bei Nüchtereinnahme) erreicht.

Arimidex wird langsam eliminiert, wobei die Plasmaspiegel über einen Zeitraum von 40 bis 50 Stunden betragen. Nahrungsaufnahme führt zu einer geringfügigen Verzögerung der Absorption, beeinflusst jedoch nicht das Ausmaß. Diese geringfügige Verzögerung lässt bei einmal täglicher Einnahme von Arimidex Filmtabletten keinen klinisch bedeutsamen Einfluss auf die Arimidex-Plasmaspiegel im Steady state erwarten. Nach 7 Tagen werden ca. 90 bis 95 % der Arimidex-Plasmaspiegel im Steady state erreicht. Es gibt keine Hinweise auf eine Zeit- oder Dosisabhängigkeit der pharmakokinetischen Parameter von Arimidex.

Die Pharmakokinetik von Arimidex bei postmenopausalen Frauen ist unabhängig vom Alter.

Die Pharmakokinetik bei Kindern ist nicht untersucht worden.

Die Plasmaproteinbindung von Arimidex beträgt ca. 40 %.

Arimidex wird bei postmenopausalen Frauen vorwiegend metabolisiert, so dass weniger als 10 % der Dosis innerhalb von 72 Stunden unverändert mit dem Urin ausgeschieden werden. Die Metabolisierung von Arimidex erfolgt durch N-Desalkylierung, Hydroxylierung und Glucuronidierung. Die Metaboliten werden überwiegend mit dem Urin ausgeschieden. Insofern der Hauptmetabolit im Plasma, so sind die Ausscheidungen nicht.

Die orale Clearance von Arimidex ist bei Patienten mit stabiler Leberinsuffizienz oder eingeschränkter Nierenfunktion liegt im Bereich der bei gesunden Patienten beobachteten Werte.

### 5.3 Präklinische Daten zur Sicherheit

#### Akute Toxizität

In Studien zur akuten Toxizität an Nagetieren betrug die mittlere letale Dosis bei oraler Gabe > 100 mg/kg/Tag und bei intraperitonealer Gabe > 50 mg/kg/Tag. In einer Studie zur akuten Toxizität an Hunden betrug die mittlere letale Dosis bei oraler Gabe > 45 mg/kg/Tag.

#### Chronische Toxizität

Untersuchungen zur chronischen Toxizität von Arimidex wurden an Ratten und Mäusen durchgeführt. In den Toxizitätsstudien wurde kein „No Effect“ Plasmaspiegel für Arimidex ermittelt, die bei den niedrigen (1 mg/kg/Tag) und mittleren Dosen (5 mg/kg/Tag bei Ratten bzw. 5 mg/kg/Tag bei Mäusen) beobachteten Wirkungen waren jedoch entweder auf die pharmakologischen oder auf die erkrankungsähnlichen Eigenschaften von Arimidex zurückzuführen und gingen nicht mit signifikant toxischen oder degenerativen Veränderungen einher.

#### Mutagenität

Mutagenitätstudien zeigen, dass Arimidex kein mutagenes oder klastogenes Agens darstellt.

#### Teratogenität

Die orale Verabreichung von Arimidex in Dosen von bis zu 10 mg/kg/Tag an trächtige Ratten und bis zu 0,2 mg/kg/Tag an trächtige Kanarienvögel hatte keine teratogene Wirkung. Die beobachteten Wirkungen (Vergrößerung der Plazenta bei Ratten und Fötalresorptionen bei Kanarienvögeln) standen im Zusammenhang mit der pharmakologischen Wirkung der Substanz.

Die Überlebensrate des Junges von Ratten, denen Arimidex in Dosen von 0,02 mg/kg/Tag und höher verabreicht wurde, war vom 17. Tag der Gestation bis zum 22. Tag post partum, war reduziert. Diese Wirkung steht mit dem pharmakologischen Einfluss der Substanz auf den Geburtsvorgang im Zusammenhang. Es wurden keine negativen Auswirkungen auf das Verhalten oder die Reproduktionsfähigkeit der ersten Nachwuchsgeneration beobachtet, die auf die Behandlung des Muttertiers mit Arimidex zurückgeführt werden könnten.

#### Karzinogenität

In einer 2-Jahres-Karzinogenitätsstudie an Ratten führte nur die Gabe hoher Dosen (5 mg/kg/Tag) zu einem vermehrten Auftreten von Lebertumoren und Bindegewebspapillomen des Uterus bei weiblichen Tieren sowie Schilddrüsenadenomen bei männlichen Tieren. Diese Veränderung tritt bei einer Dosis auf, die dem 10fachen der therapeutischen Dosis beim Menschen entspricht, und werden für die Behandlung von Patientinnen mit Arimidex nicht als klinisch relevant angesehen.



Eine 2-Jahres-Onkogenstudie an Mäusen führte zur Bildung benigner Ovarialtumoren und einer Störung in der Inzidenz lymphoretikulärer Neoplasmen (weniger Leukozyten-Sarkome bei weiblichen Tieren und mehr Todesfälle infolge von Lymphomen). Diese Veränderungen werden bei der Maus als nicht spezifische Wirkungen der Aromatasehemmung und als nicht klinisch relevant für die Behandlung von Patienten mit Arimidex angesehen.

**6. Pharmazeutische Angaben**

**6.1 Sonstige Bestandteile**

Lactose-Monohydrat  
 Povidon (K29-32)  
 Poly(D-carboxymethylstärke), Natriumsalz  
 Magnesiumstearat (Ph.Eur.)  
 Hypromellose  
 Macrogol 300  
 Tandeloxid (E 171)

**6.2 Inkompatibilitäten**

Keine bekannt

**6.3 Dauer der Haltbarkeit**

Die Halbwertsdauer von Arimidex beträgt 5 Jahre.

**6.4 Besondere Lagerungshinweise**

Nicht über 30°C lagern

**6.5 Art und Inhalt des Behältnisses**

Blister aus PVC/Aluminiumfolie in einer Folienpackung

Packungsgrößen:  
 30 Filmtabletten **N1**  
 100 Filmtabletten **N3**  
 300 (10 x 30) Filmtabletten (Klinikpackung)

**6.6 Hinweise für die Handhabung**

Keine

**7. Pharmazeutischer Unternehmer**

AstraZeneca GmbH  
 22876 Wedel  
 Telefon 041 03 / 70 89  
 Telefax 041 03 / 70 32 93  
 E-Mail [arimidex@astrazeneca.com](mailto:arimidex@astrazeneca.com)  
[www.astrazeneca.de](http://www.astrazeneca.de)

**8. Zulassungsnummer**

37 88 00 00

**9. Datum der Zulassung /  
 Verlängerung der Zulassung**

04.06.1999/11.08.2000

**10. Stand der Information**

Juli 2004

**11. Verschreibungsstatus/  
 Apothekenpflicht**

Verschreibungspflichtig

Juli 2004

37880000 - Arimidex 1 mg Filmtabletten - 6

Zentrale Anfordersung an:

EFPI Service GmbH

FachInfo-Service

Postfach 12 55

85322 Aukendorf

3



# 8.11.7 Zoledronate

Fachinformation (Zusammenfassung der Merkmale des Arzneimittels/SPC)

**Novartis Pharma**

**Zometa® 4 mg/5 ml**

**1. Bezeichnung des Arzneimittels**

Zometa® 4 mg/5 ml Konzentrat zur Herstellung einer Infusionslösung

**2. Qualitative und quantitative Zusammensetzung**

Eine Durchstechflasche mit 5 ml Konzentrat enthält 4 mg Zoledronsäure (wasserfrei).

1 ml Konzentrat enthält Zoledronsäuremonohydrat entsprechend 0,5 mg Zoledronsäure (wasserfrei).

Hierseite siehe unser Abschnitt 6.1.

**3. Darreichungsform**

Konzentrat zur Herstellung einer Infusionslösung

**4. Klinische Angaben**

**4.1 Anwendungsgebiete**

- Prävention skelettbezogener Komplikationen (pathologische Frakturen, Wirbelkompressionen, Bestrahlung toxische Operation am Knochen oder tumorinduzierte Hyperkalzämie) bei Patienten mit fortgeschrittenen, auf das Skelett ausgedehnten, Tumorerkrankungen.
- Behandlung der tumorinduzierten Hyperkalzämie (TH)

**4.2 Dosierung, Art und Dauer der Anwendung**

Zometa darf nur von Ärzten angewendet werden, die Erfahrung mit der Anwendung von intravenösen Bisphosphonaten haben.

**Prävention skelettbezogener Komplikationen bei Patienten mit fortgeschrittenen, auf das Skelett ausgedehnten, Tumorerkrankungen**

**Erwachsene und ältere Patienten**  
Die empfohlene Dosis für die Prävention skelettbezogener Ereignisse bei Patienten mit fortgeschrittenen, auf das Skelett ausgedehnten, Tumorerkrankungen beträgt 4 mg Zoledronsäure in Abständen von 3-4 Wochen. Das Konzentrat muss mit 100 ml einer sterilen 0,9 % w/v Natriumchlorid- oder 5 % w/v Glukoselösung weiter verdünnt und in einer einzigen, mindestens 15-minütigen intravenösen Infusion verabreicht werden.

Diese Patienten sollten zusätzlich 500 mg Calcium und 400 I.E. Vitamin D pro Tag oral erhalten.

**Behandlung der TH**

**Erwachsene und ältere Patienten**  
Die empfohlene Dosierung bei Hyperkalzämie (Albumin-korrigierter Serum-Kalzium-Spiegel  $\geq 12$  mg/dl oder 3,0 mmol/l) beträgt 4 mg Zoledronsäure. Das Konzentrat muss mit 100 ml einer sterilen 0,9 % w/v Natriumchlorid- oder 5 % w/v Glukoselösung weiter verdünnt und in einer einzigen mindestens 15-minütigen intravenösen Infusion verabreicht werden. Vor und im Anschluss an die Anwendung von Zometa muss bei den Patienten eine ausreichende Hydratation gewährleistet sein.

**Nierenfunktionsstörungen**

**TH**  
Die Behandlung mit Zometa bei Patienten mit TH und einer schweren Nierenfunktions-

störung sollte nur nach vorheriger Nutzen-Risiko-Bewertung der Behandlung erfolgen werden. In den klinischen Studien waren Patienten mit einem Serum-Kreatinin  $> 400 \mu\text{mol/l}$  oder  $> 4,5 \text{ mg/dl}$  ausgeschlossen. Bei Patienten mit TH und einem Serum-Kreatinin  $< 400 \mu\text{mol/l}$  oder  $< 4,5 \text{ mg/dl}$  sind keine Dosisanpassungen erforderlich (siehe Abschnitt 4.4 „Warnhinweise und Vorsichtsmaßnahmen für die Anwendung“).

**Prävention skelettbezogener Komplikationen bei Patienten mit fortgeschrittenen, auf das Skelett ausgedehnten, Tumorerkrankungen**

Zu Beginn der Behandlung mit Zometa sollte bei Patienten mit multiplem Myelom oder metastatischen Knochenläsionen aufgrund solider Tumoren das Serum-Kreatinin und die Kreatinin-Clearance (CrCl) bestimmt werden. Die CrCl wird aus dem Serum-Kreatinin unter Verwendung der Cockcroft-Gault-Formel berechnet. Bei Patienten, die bereits vor Beginn der Behandlung eine schwere Nierenfunktionsstörung aufweisen, die für diese Patientenpopulation als CrCl  $< 30 \text{ ml/min}$  definiert ist, wird Zometa nicht empfohlen. In den klinischen Studien mit Zometa waren Patienten mit einem Serum-Kreatinin  $> 265 \mu\text{mol/l}$  oder  $> 3,0 \text{ mg/dl}$  ausgeschlossen.

Bei Patienten mit Knochenmetastasen, die vor Beginn der Therapie eine leichte bis mittelschwere Nierenfunktionsstörung aufweisen, die bei dieser Patientenpopulation als CrCl 30-60 ml/min definiert ist, werden folgende Dosierungen von Zometa empfohlen (siehe auch Abschnitt 4.4 „Warnhinweise und Vorsichtsmaßnahmen für die Anwendung“):

| Kreatinin-Clearance zu Beginn der Behandlung (ml/min) | Empfohlene Zometa-Dosierung* |
|-------------------------------------------------------|------------------------------|
| $> 60$                                                | 4,0 mg                       |
| 50-60                                                 | 3,5 mg*                      |
| 40-49                                                 | 3,3 mg*                      |
| 30-39                                                 | 3,0 mg*                      |

\* Die Dosierungen wurden berechnet unter Annahme einer  $24\text{-h-AUC}$  von 0,66 mg $\cdot$ h/l (CrCl = 75 ml/min). Die empfohlenen Dosen für Patienten mit Nierenfunktionsstörungen lassen erwarten, dass die gleiche AUC erreicht wird wie bei Patienten mit einer Kreatinin-Clearance von 75 ml/min beobachtet wurde.

Nach Beginn der Behandlung sollte vor jeder Gabe von Zometa das Serum-Kreatinin gemessen und auf die weitere Behandlung verachtet werden, wenn sich die Nierenfunktion verschlechtert hat.

In den klinischen Studien wurde eine Verschlechterung der Nierenfunktion wie folgt definiert:

- Bei Patienten mit normalem Serum-Kreatinin zu Beginn der Behandlung ( $< 1,4 \text{ mg/dl}$  oder  $< 124 \mu\text{mol/l}$ ) ein Anstieg um 0,5 mg/dl oder 44  $\mu\text{mol/l}$ .
- Bei Patienten mit erhöhtem Serum-Kreatinin zu Beginn der Behandlung ( $\geq 1,4 \text{ mg/dl}$  oder  $\geq 124 \mu\text{mol/l}$ ) ein Anstieg um 1,0 mg/dl oder 88  $\mu\text{mol/l}$ .

In klinischen Studien wurde die Behandlung mit Zometa erst dann erneut aufgenommen, wenn die Kreatinin-Werte nur noch maximal 10 % über dem Ausgangswert lagen (siehe Abschnitt 4.4 „Warnhinweise und Vorsichtsmaßnahmen für die Anwendung“). Die Therapie mit Zometa sollte mit der gleichen Dosis wie vor der Unterbrechung der Behandlung wieder aufgenommen werden.

**Anweisungen zur Zubereitung der verminderten Dosen von Zometa**

Ernehmen Sie das jeweils entsprechende Volumen der Infusionslösungskonzentrate:

- 4,4 ml für eine Dosis von 3,5 mg
- 4,1 ml für eine Dosis von 3,3 mg
- 3,8 ml für eine Dosis von 3,0 mg

Die annehmere Menge des Infusionslösungskonzentrates muss in 100 ml steriler 0,9%iger Natriumchloridlösung oder 5%iger Glukoselösung verdünnt werden. Die Dosis muss in einer einzigen intravenösen Infusion über mindestens 15 Minuten verabreicht werden.

Die Anwendung von Zometa bei Kindern wurde nicht untersucht. Zometa sollte bei dieser Patientenpopulation nicht angewendet werden, bis weitere Daten zur Verfügung stehen.

**4.3 Gegenanzeigen**

Zometa Konzentrat zur Herstellung einer Infusionslösung ist während der Schwangerschaft und Stillzeit sowie bei Patienten mit klinisch bedeutsamer Überempfindlichkeit gegenüber Zoledronsäure, andere Bisphosphonate oder einem der sonstigen Bestandteile von Zometa kontraindiziert.

**4.4 Warnhinweise und Vorsichtsmaßnahmen für die Anwendung**

Vor der Applikation von Zometa muss eingeschätzt werden, ob der Patient in einem adäquaten Hydratationszustand ist. Wenn das nicht der Fall ist, muss dieser vor der Applikation hergestellt werden.

Die üblicherweise mit einer Hyperkalzämie in Zusammenhang stehenden metabolischen Parameter wie z. B. die Serumspiegel von Kalzium, Phosphat und Magnesium sollten nach Einleitung der Therapie mit Zometa sorgfältig überwacht werden. Bei Auftreten von Hypokalzämie, Hypophosphatämie oder Hypomagnesiämie kann eine kurzzeitige Substitution notwendig werden. Unbehandelte Patienten mit Hyperkalzämie weisen im Allgemeinen eine Nierenfunktionsstörung auf. Deshalb sollte eine sorgfältige Überwachung der Nierenfunktion in Erwägung gezogen werden.

Bei Patienten mit TH, bei denen sich Hinweise auf eine Verschlechterung der Nierenfunktion ergeben, ist darauf zu achten, dass der potenzielle Nutzen einer Behandlung mit Zometa gegenüber möglichen Risiken überwiegt.

Bei der Entscheidung zur Behandlung von Patienten mit Knochenmetastasen auf Prävention skelettbezogener Ereignisse sollte berücksichtigt werden, dass der Behandlungseffekt nach 2-3 Monaten einsetzt.

November 2004 / MS 04/03 Nr. 11 - 0870

8116305 - Zometa 4 mg/5 ml - 8



SUCCESS-Trial, Version 1.2, 15.8.2005



Zometa wurde, wie auch andere Bisphosphonate, mit Berichten von Nierenfunktionsstörungen in Zusammenhang gebracht. Faktoren, die die Wahrscheinlichkeit einer Verschlechterung der Nierenfunktion erhöhen können, sind unter anderem Dehydratation, vorbestehende Nierenfunktionsstörungen, mehrere Behandlungszyklen mit Zometa und anderen Bisphosphonaten sowie die Anwendung anderer nephrotoxischer Substanzen. Auch wenn das Risiko bei einer Dosierung von 4 mg Zometa, gegeben über 15 Minuten, verringert ist, kann dennoch eine Verschlechterung der Nierenfunktion auftreten. Ein Anstieg des Serum-Kreatinins ist bei einigen Patienten auch unter chronischer Anwendung von Zometa in der empfohlenen Dosis zur Prävention skelettspezifischer Ereignisse auf, wenngleich weitgehend.

Vor jeder Gabe von Zometa sollen die Serum-Kreatinin-Werte der Patienten bestimmt werden. Zu Beginn der Behandlung von Patienten mit Knochenmetastasen mit schweren und mittelschweren Nierenfunktionsstörungen werden niedrigere Dosen von Zometa empfohlen. Bei Hinweis auf eine Verschlechterung der Nierenfunktion während der Behandlung sollte Zometa abgesetzt werden. Zometa sollte erst dann erneut gegeben werden, wenn die Serum-Kreatinin-Werte nur noch maximal 10 % über dem Ausgangswert liegen (siehe Abschnitt 4.2 „Dosierung, Art und Dauer der Anwendung“).

Angesichts eines möglichen Einflusses von Bisphosphonaten, einschließlich Zometa, auf die Nierenfunktion, kann wegen des Fehlens von Daten zur klinischen Verträglichkeit bei Patienten mit schweren Nierenfunktionsstörungen zu Beginn der Behandlung (in klinischen Studien definiert als Serum-Kreatinin  $\geq 400 \mu\text{mol/l}$  oder  $\geq 4,5 \text{ mg/dl}$  bei Patienten mit TH bzw.  $\geq 265 \mu\text{mol/l}$  oder  $\geq 3,0 \text{ mg/dl}$  bei Patienten mit Tumoren und Knochenmetastasen) sowie nur bei ganzer pharmakokinetischer Dosis bei Patienten mit schweren Nierenfunktionsstörungen zu Beginn der Behandlung (Kreatinin-Clearance  $< 30 \text{ ml/min}$ ) die Anwendung von Zometa bei Patienten mit schweren Nierenfunktionsstörungen nicht empfohlen werden.

Da für die Behandlung von Patienten mit schweren Leberfunktionsstörungen nur wenige klinische Daten verfügbar sind, können für diese Patienten keine speziellen Empfehlungen gegeben werden.

Eine Hyperhydratation ist bei Patienten mit einem Risiko für eine Herzinsuffizienz zu vermeiden.

Bei Kindern wurde die Sicherheit und Wirksamkeit von Zometa nicht untersucht.

Bei Tumorpatienten, die mit Therapieschema behandelt wurden, die auch Bisphosphonate einschlossen, wurden Osteonekrosen im Kieferbereich berichtet. Viele dieser Patienten erhielten zusätzlich eine Chemotherapie und Kortikosteroide. Die Mehrheit der berichteten Fälle ist bei gleichzeitiger dentaler Behandlung wie z. B. Zahnextraktion auf. Viele Patienten haben Anzeichen einer lokalen Infektion einschließlich Osteomyelitis.

Vor der Behandlung mit Bisphosphonaten sollte bei Patienten mit gleichzeitig vorhandenen Risikofaktoren (z. B. Tumoren, Chemotherapie, Kortikosteroide, mangelhafte Mundhygiene) eine zahnärztliche Untersuchung einschließlich einer geeigneten Leistung prophylaktischer Maßnahmen erwogen werden.

Während der Behandlung sollen bei diesen Patienten invasive dentale Eingriffe möglichst vermieden werden. Bei Patienten, bei denen während der Behandlung mit Bisphosphonaten eine Osteonekrose im Kieferbereich aufgetreten ist, kann ein dentaler Eingriff zur Verschlechterung des Zustandes führen. Für Patienten, bei denen invasive dentale Eingriffe erforderlich sind, gibt es keine Daten, die darauf hinweisen, ob eine Unterbrechung der Bisphosphonat-Behandlung das Risiko einer Osteonekrose im Kieferbereich vermindert. Für den Behandlungspfad eines jeden Patienten sollte die klinische Beurteilung des behandelnden Arztes, basierend auf der individuellen Nutzen-Risiko-Abwägung, ausschlaggebend sein.

**4.5 Wechselwirkungen mit anderen Arzneimitteln und sonstige Wechselwirkungen**

In klinischen Studien wurde Zometa gemeinsam mit häufig verwendeten antitumoralen Arzneimitteln sowie mit Diuretika, Antibiotika und Analgetika angewandt, ohne dass klinisch erkennbare Wechselwirkungen aufgetreten waren. Zoledronsäure wird nur unvollständig an Plasmaproteine gebunden und hemmt *in vitro* keine humanen P450-Enzyme (siehe Abschnitt 5.2 „Pharmakokinetische Eigenschaften“). Spezielle klinische Studien zu Wechselwirkungen wurden jedoch nicht durchgeführt. Vorsicht ist geboten, wenn Bisphosphonate gleichzeitig mit Aminoglykosiden angewandt werden, weil beide Substanzklassen einen additiven Effekt zeigen können, der zu einem niedrigeren Serum-Kalzium-Spiegel über einen länger als erforderlichen Zeitraum führen kann. Vorsicht ist geboten, wenn Zometa zusätzlich mit anderen Arzneimitteln gegeben wird, die möglicherweise ebenfalls die Nierenfunktion beeinträchtigen können. Es ist auch auf eine möglicherweise während der Behandlung auftretende Hypomagnesämie zu achten.

Bei Patienten mit multiplem Myelom kann das Risiko für eine Verschlechterung der Nierenfunktion erhöht sein, wenn intravenös gegebene Bisphosphonate zusammen mit Trisodium angewendet werden.

**4.6 Schwangerschaft und Stillzeit**

Es gibt keine ausreichenden Daten über die Anwendung von Zoledronsäure bei schwangeren Frauen. In tierexperimentellen Studien zeigte Zoledronsäure ein reproduktionstoxikologisches Potenzial (siehe Abschnitt 5.3 „Klinische Daten zur Sicherheit“). Bei Frauen wurden bei der niedrigsten verwendeten Dosierung (0,01 mg/kg Körpergewicht) Wehenanomalien (Dysokie) beobachtet. Das potenzielle Risiko für den Menschen ist unbekannt. Zometa sollte während der Schwangerschaft nicht angewendet werden.

Es ist nicht bekannt, ob Zoledronsäure in die Muttermilch übergeht. Zometa sollte in der Stillzeit nicht angewendet werden (siehe Abschnitt 4.3 „Gegenanzeigen“).

**4.7 Auswirkungen auf die Verkehrstüchtigkeit und das Bedienen von Maschinen**

Es wurden keine Studien zu den Auswirkungen auf die Verkehrstüchtigkeit und das Bedienen von Maschinen durchgeführt.

**4.8 Nebenwirkungen**

Die Häufigkeitsangaben von Nebenwirkungen unter Zometa 4 mg beruhen hauptsächlich auf Daten, die bei der chronischen Anwendung erhoben wurden. Nebenwirkungen von Zometa sind vergleichbar mit denjenigen, die für andere Bisphosphonate berichtet wurden und können bei ca. einem Drittel der Patienten erwartet werden. Nach intravenöser Gabe kommt es am häufigsten zu grippeähnlichen Symptomen (bei ca. 9 % der Patienten) einschließlich Knöchelschmerzen (9,1 %), Fieber (7,2 %), Müdigkeit (4,1 %) und Schwindel (2,9 %). Gelegentlich treten Fälle von Anämie und Myalgie auf (ca. 3 %). Es gibt keine Informationen darüber, ob diese Nebenwirkungen reversibel sind.

Die verminderte Kalziumausscheidung im Urin geht häufig mit einer asymptomatischen und nicht behandlungsbedürftigen Abnahme des Serumphosphatspiegels einher (20 % der Patienten). Der Serum-Kalzium-Spiegel kann auf asymptomatische, hypokalzämische Werte sinken (ca. 3 % der Patienten).

Nach intravenöser Infusion von Zometa wurde über gastrointestinale Beschwerden wie Übelkeit (5,8 %) und Erbrechen (2,6 %) berichtet. Darüber hinaus wurden gelegentlich auch lokale Reaktionen an der Infusionsstelle wie Rötung oder Schwellung und/oder Schmerz bei weniger als 1 % der Patienten beobachtet.

Bei 1,5 % der mit Zometa 4 mg behandelten Patienten wurde über Appetitlosigkeit berichtet.

Einige wenige Fälle von Hautausschlag oder Juckreiz wurden beobachtet (unter 1 %).

Wie bei anderen Bisphosphonaten wurden Fälle von Konjunktivitis (ca. 1 %) beschrieben.

Es gibt einige Berichte über das Auftreten von Nierenfunktionsstörungen (2,3 %), die jedoch in vielen Fällen von multifunktionaler Genese sein können.

Bei einer gemeinsamen Analyse placebokontrollierter Studien wurde eine schwere Anämie (Hb  $< 8,0 \text{ g/dl}$ ) bei 5,2 % der mit Zometa 4 mg und bei 4,2 % der mit Placebo behandelten Patienten beobachtet.

Die folgenden, in Tabelle 1 aufgeführten Nebenwirkungen sind in klinischen Studien hauptsächlich nach chronischer Behandlung mit Zoledronsäure aufgetreten.

0153298 - Zometa 4 mg/5 ml - 0



**Tabelle 1:**

Die Nebenwirkungen sind entsprechend ihrer Häufigkeit geordnet. Die häufigste Nebenwirkung wird zuerst genannt. Folgende Beschreibung wird verwendet: Sehr häufig (≥ 1/10), Häufig (≥ 1/100, < 1/10), gelegentlich (≥ 1/1.000, < 1/100), selten (≥ 1/10.000, < 1/1.000), sehr selten (< 1/10.000) einschließlich Einzelfälle.

**Blut- und lymphatisches System**

Häufig: Anämie  
Gelegentlich: Thrombozytopenie, Leukopenie  
Selten: Pancytopenie

**Nervensystem**

Häufig: Kopfschmerzen  
Gelegentlich: Schwindel, Parästhesien, Geschmacksstörungen, Hypästhesie, Hyperästhesie, Tremor

**Psychische Störungen**

Gelegentlich: Unruhe, Schlafstörungen  
Selten: Verwirrung

**Augen**

Häufig: Konjunktivitis  
Gelegentlich: Verschwommenes Sehen  
Sehr selten: Uveitis, Episkleritis

**Gastrointestinal-Trakt**

Häufig: Übelkeit, Erbrechen, Appetitlosigkeit  
Gelegentlich: Durchfall, Verstopfung, abdominale Schmerzen, Dyspepsie, Sodbrennen, Sodbrennen, Sodbrennen, Sodbrennen, Sodbrennen

**Atemwege (Erkrankungen des Thώρα und Mediastinālraums)**

Gelegentlich: Dyspnoe, Husten

**Haut und subkutane Gewebe**

Gelegentlich: Pruritus, Ausschlag (einschließlich erythematöser und makulärer Ausschlag), verstärktes Schwitzen

**Skelettmuskelsystem, Bindegewebe und Knochen**

Häufig: Knochenschmerzen, Myalgie, Antralgie, generalisierte Schmerzen  
Gelegentlich: Muskeldämpfe

**Herz-Kreislauf-System**

Gelegentlich: Hypertonie  
Selten: Bradykardie

**Uro-Genital-System**

Häufig: Nierenfunktionsstörungen  
Gelegentlich: Akutes Nierenversagen, Hämaturie, Proteinurie

**Immunsystem**

Gelegentlich: Überempfindlichkeitsreaktionen  
Selten: Angioödem

**Allgemeine und behandlungsspezifische Auswirkungen**

Häufig: Fieber, grippeähnliche Symptome (einschließlich Müdigkeit, Schweißausbruch, Krankheitsgefühl, Fluß)  
Gelegentlich: Asthenie, periphere Ödeme, Reaktionen an der Injektionsstelle (einschließlich Schmerz, Irritationen, Schwellung, Induration), Thoraxschmerzen, Gewichtszunahme

**Laborwertveränderungen**

Sehr häufig: Hypophosphatämie  
Häufig: Erhöhung des Serum-Kreatinins und -harnstoffs, Hypokalzämie  
Gelegentlich: Hypomagnesiämie, Hypokalzämie  
Selten: Hyperkalzämie, Hypernatriämie

Im Rahmen der Spontanerfassung von Nebenwirkungen wurde in seltenen Fällen bei Patienten, die mit Bisphosphonaten behandelt wurden, über Osteonekrosen (vorwiegend im Kieferbereich) berichtet. Viele Patienten haben Anzeichen einer lokalen Infektion, einschließlich Osteomyelitis. Die Mehrheit der Berichte bezieht sich auf Tumorerkrankungen nach Zahnextraktion oder anderen dentalen Eingriffen. Es gibt zahlreiche, gut dokumentierte Risikofaktoren für Osteonekrosen der Kieferknochen einschließlich einer Tumordiagnose, verschiedener Begleittherapien (z. B. Chemo- oder Radiotherapie, Behandlung mit Kortikosteroiden) sowie gleichzeitig bestehender Erkrankungen (z. B. Anämien, Koagulopathie, Infektionen, vorbestehende Erkrankungen im Mundbereich). Obwohl keine kausale Beziehung werden kann, sollen bei Patienten, die mit Zometa behandelt werden, vorzichtshalber dentale Eingriffe vermieden werden, da es zu einer verzögerten Genesung kommen kann (siehe Abschnitt 4.4 „Warnhinweise und Vorsichtsmaßnahmen für die Anwendung“).

**4.9 Überdosierung**

Bisher liegen keine Erfahrungen über akute Intoxikationen mit Zometa vor. Patienten, die eine höhere als die empfohlene Dosis erhalten haben, müssen sorgfältig überwacht werden. Eine klinisch relevante Hypokalzämie muss durch Infusion von Kaliumgluconat ausgeglichen werden.

**5. Pharmakologische Eigenschaften**

**5.1 Pharmakodynamische Eigenschaften**  
Pharmakotherapeutische Gruppe: Bisphosphonate, ATC-Code: M05 BA 08

Zoledronsäure gehört zur Gruppe der Bisphosphonate und wirkt primär am Knochen. Sie ist ein Inhibitor der Knochenresorption.

Die selektive Wirkung von Bisphosphonaten auf das Knochengewebe ist durch ihre hohe Affinität zum Knochenmineral bedingt. Der genaue molekulare Wirkungsmechanismus, der zur Hemmung der Osteoklastenaktivität führt, ist bisher jedoch nicht bekannt. In Langzeituntersuchungen am Tier hemmt Zoledronsäure die Knochenresorption, ohne die Neubildung, die Mineralisation oder die mechanischen Eigenschaften des Knochens nachteilig zu beeinflussen.

Zusätzlich zu ihrer Eigenschaft als potenter Inhibitor der Knochenresorption besitzt Zoledronsäure verschiedene Anti-Tumor-Eigenschaften, die zur Gesamtwirkung der Substanz bei der Behandlung von metastatischen Knochenveränderungen beitragen können. Die folgenden Eigenschaften wurden in präklinischen Studien nachgewiesen:

- *in vitro*: Hemmung der durch Osteoklasten verursachten Knochenresorption, wo-

durch das Mikro-Milieu des Knochenmarks verändert und dadurch weniger anfällig für das Wachstum von Tumorzellen wird. Außerdem: Anti-Angiogenese-Aktive: antagonistischer Effekt.

- *in vitro*: Hemmung der Osteoblastenproliferation, direkte zytotoxische und proapoptische Aktive auf Tumorzellen; synergistischer zytotoxischer Effekt mit anderen anti-tumoralen Arzneimitteln und Anti-Achtungs/Invasions-Wirkung.

**Ergebnisse klinischer Studien bei der Prävention skelettbezogener Komplikationen bei Patienten mit fortgeschrittenen, auf das Skelett ausgedehnten Tumorerkrankungen**

In der ersten randomisierten, doppelblinden, placebokontrollierten Studie wurden Zometa 4 mg und Placebo zur Prävention von Skelettkomplicationen („Skeletal Related Events“ – SREs) bei Patienten mit Prostatakarzinom verglichen. Zometa 4 mg reduzierte signifikant den Anteil der Patienten, die mindestens eine SRE erlitten, vergangen die Zeit (median) bis zum Auftreten der ersten SRE um mehr als 5 Monate und verringerte die skeletale Morbiditätsrate (Anzahl der SREs pro Patient und Jahr). Eine Multiple-Event-Analyse zeigte in der Zometa-Gruppe eine 30%ige Risikoreduktion für das Auftreten von SREs im Vergleich zu Placebo. Unter Zometa berichteten die Patienten über eine geringere Schmerzzunahme als unter Placebo. Dieser Unterschied war nach 3, 9, 21 und 24 Monaten signifikant. Weniger Zometa-Patienten erlitten pathologische Frakturen. Die Behandlungseffekte waren bei Patienten mit metastatischen Läsionen weniger ausgeprägt. Die Ergebnisse zur Wirksamkeit sind in Tabelle 2 zusammengefasst.

In einer zweiten Studie zu anderen soliden Tumoren als Mamma- oder Prostatakarzinom reduzierte Zometa 4 mg signifikant den Anteil der Patienten mit einer SRE, vergangen im Median die Zeit bis zum ersten Auftreten einer SRE um mehr als 2 Monate und verringerte die skeletale Morbiditätsrate. Eine Multiple-Event-Analyse zeigte in der Zometa-Gruppe eine 30,7%ige Risikoreduktion für SREs im Vergleich zu Placebo. Die Ergebnisse zur Wirksamkeit sind in Tabelle 3 zusammengefasst.

In einer dritten doppelblinden, randomisierten Phase-II-Studie wurde die Anwendung von Zometa 4 mg mit 90 mg Pamidronsäure jeweils alle 3 bis 4 Wochen bei Patienten mit Multiple Myelom oder Mammakarzinom und mindestens einer Knochenläsion verglichen. Die Ergebnisse zeigen, dass Zometa 4 mg in der Prävention skelettbezogener Ereignisse eine vergleichbare Wirksamkeit aufweist wie 90 mg Pamidronsäure. Die Multiple-Event-Analyse zeigte in der Zometa-4-mg-Gruppe eine signifikante 16%ige Risikoreduktion im Vergleich zu Patienten, die Pamidronsäure erhalten haben. Die Ergebnisse zur Wirksamkeit sind in Tabelle 4 zusammengefasst.

**Ergebnisse klinischer Studien in der Behandlung der TH:**

Klinische Studien bei tumorinduzierter Hyperkalzämie (TH) zeigen, dass die Wirkung von Zoledronsäure durch eine Abnahme

November 2004 / M05 04/03 Art. Nr.: 60303

SPC ZOMETA 4 mg/5 ml - 2

3





# Zometa® 4 mg/5 ml

Novartis Pharma

**Tabelle 2:** Ergebnisse zur Wirksamkeit (Patienten mit Prostatakarzinom unter hormoneller Therapie)

|                                                         | SRE (+ TH)  |         | Frakturen*  |         | Radiotherapie am Knochen |          |
|---------------------------------------------------------|-------------|---------|-------------|---------|--------------------------|----------|
|                                                         | Zometa 4 mg | Placebo | Zometa 4 mg | Placebo | Zometa 4 mg              | Placebo  |
| Anzahl (N)                                              | 214         | 208     | 214         | 208     | 214                      | 208      |
| Anzahl Patienten mit SREs (%)                           | 36          | 49      | 17          | 25      | 26                       | 33       |
| p-Wert                                                  | 0,028       |         | 0,052       |         | 0,119                    |          |
| Zeit bis zum Auftreten der ersten SRE in Tagen (median) | 488 Tage    | 321     | NE          | NE      | NE                       | 640 Tage |
| p-Wert                                                  | 0,009       |         | 0,020       |         | 0,055                    |          |
| Skleletale Morbiditätsrate                              | 0,77        | 1,47    | 0,20        | 0,45    | 0,42                     | 0,69     |
| p-Wert                                                  | 0,005       |         | 0,023       |         | 0,090                    |          |
| Risikoreduktion gemäß Multiple-Event-Analyse** (%)      | 36          | —       | NZ          | NZ      | NZ                       | NZ       |
| p-Wert                                                  | 0,002       |         | NZ          |         | NZ                       |          |

**Tabelle 3:** Ergebnisse zur Wirksamkeit (solide Tumoren außer Mammakarzinom und Prostatakarzinom)

|                                                         | SRE (+ TH)  |         | Frakturen*  |         | Radiotherapie am Knochen |         |
|---------------------------------------------------------|-------------|---------|-------------|---------|--------------------------|---------|
|                                                         | Zometa 4 mg | Placebo | Zometa 4 mg | Placebo | Zometa 4 mg              | Placebo |
| Anzahl (N)                                              | 257         | 250     | 257         | 250     | 257                      | 250     |
| Anzahl Patienten mit SREs (%)                           | 39          | 48      | 16          | 22      | 29                       | 34      |
| p-Wert                                                  | 0,039       |         | 0,054       |         | 0,173                    |         |
| Zeit bis zum Auftreten der ersten SRE in Tagen (median) | 236         | 155     | NE          | NE      | 424                      | 307     |
| p-Wert                                                  | 0,009       |         | 0,020       |         | 0,079                    |         |
| Skleletale Morbiditätsrate                              | 1,74        | 2,71    | 0,39        | 0,63    | 1,24                     | 1,89    |
| p-Wert                                                  | 0,012       |         | 0,006       |         | 0,009                    |         |
| Risikoreduktion gemäß Multiple-Event-Analyse** (%)      | 30,7        | —       | NZ          | NZ      | NZ                       | NZ      |
| p-Wert                                                  | 0,003       |         | NZ          |         | NZ                       |         |

\* venöse und nicht venöse Frakturen

\*\* Alle skeletalen Ereignisse, sowohl gesamte Anzahl als auch Zeit bis zum Eintreten jedes Ereignisses während der Studie

NE: Nicht erreicht

NZ: Nicht zureichend

das Serum-Kalzium und der Kalziumausscheidung im Urin gekennzeichnet ist. In Phase-4-Dosisfindungsstudien an Patienten mit leichter bis mittelschwerer tumorinduzierter Hyperkalzämie (TH) lagen die untersuchten, wirksamen Dosierungen im Bereich von ca. 1,2–2,5 mg.

Zum Nachweis der Wirksamkeit von Zometa im Vergleich zu 90 mg Pamidronsäure wurden die Ergebnisse von zwei pivotalen, multizentrischen Studien an Patienten mit TH in einer vorher geplanten Analyse kombiniert.

Es erfolgte eine schnellere Normalisierung des korrigierten Serum-Kalziums am Tag 4 mit 8 mg Zometa und am Tag 7 mit 4 mg und 8 mg Zometa. Die folgenden Ansprechereisen wurden beobachtet:

Siehe Tabelle 5.

Im Median betrug die Zeit bis zum Erreichen normokalzämischer Werte 4 Tage. Die mediane Dauer bis zum Reaktiv(Wiederanstieg der Albumin-korrigierten Serum-Kalzium-Spiegel auf  $\geq 2,0$  mmol/l) betrug 30–40 Tage bei Patienten, die mit Zometa behandelt

wurden, gegenüber 17 Tagen bei denjenigen, die mit 90 mg Pamidronsäure behandelt wurden (p-Werte: 0,001 für 4 mg und 0,007 für 8 mg). Zwischen beiden Zometa-Dosierungen gab es keine statistisch signifikanten Unterschiede.

In klinischen Studien erhielten 69 Patienten, die gegenüber der ersten Behandlung (4 mg oder 8 mg Zometa oder 90 mg Pamidronäure) reaktiv waren, eine Wiederbehandlung mit 8 mg Zometa. Die Ansprechrate betrug bei diesen Patienten ca. 52 %. Da diese Patienten ausschließlich mit der 8 mg Dosis wiederbehandelt wurden, sind keine Daten verfügbar, die einen Vergleich mit der 4 mg Dosis erlauben würden.

In klinischen Studien an Patienten mit tumorinduzierter Hyperkalzämie (TH) war das gesamte Sicherheitsprofil zwischen allen drei Behandlungsgruppen (4 mg und 8 mg Zoledronsäure und 90 mg Pamidronäure) hinsichtlich Art und Schweregrad vergleichbar.

### 5.2 Pharmakokinetische Eigenschaften

Eine einmalige oder mehrfache 5- und 15-minütige Infusion von 2, 4, 8 und 16 mg Zoledronsäure bei 54 Patienten mit Knochenmetastasen ergab die folgenden dosisunabhängigen pharmakokinetischen Daten.

Nach Start der Zoledronsäure-Infusion erhöhte sich die Plasmaproteinbindung des Wirkstoffs schnell, wobei die Plasmaproteinbindung am Ende der Infusionszeit erreicht wird. Es folgt ein schneller Rückgang auf  $< 10\%$  der Plasmaproteinkonzentration nach 4 Stunden und auf  $< 1\%$  nach 24 Stunden, gefolgt von einem längeren Zeitraum mit sehr niedrigen Konzentrationen, die nicht über 0,1 % der Plasmaproteinkonzentration hinausgehen, bevor am Tag 28 die zweite Infusion des Wirkstoffs erfolgt.

Die Ausscheidung von instabilen, wasserlöslicher Zoledronsäure verläuft biphasisch: Eine schnelle, biphasische Elimination aus der systemischen Zirkulation mit Halbwertszeiten von  $t_{1/2\alpha}$  0,24 und  $t_{1/2\beta}$  1,67 Stunden, gefolgt von einer lang andauernden Eliminationsphase mit einer terminalen Eliminationshalbwertszeit von  $t_{1/2\gamma}$  146 Stunden. Auch nach Mehrfachgabe (alle 28 Tage) kommt es nicht zur Akkumulation von Wirkstoff im Plasma. Zoledronsäure wird nicht metabolisiert, sondern unverändert über die Nieren ausgeschieden. Innerhalb der ersten 24 Stunden werden  $39 \pm 16\%$  der verabreichten Dosis im Urin wieder gefunden, während die Restmenge prinzipiell am Knochengewebe gebunden ist. Aus dem Knochengewebe wird Zoledronsäure sehr langsam zurück in den systemischen Kreislauf abgegeben und über die Nieren ausgeschieden. Die Gesamtkörper-Clearance beträgt unabhängig von der Dosierung  $5,04 \pm 2,5$  l/h und wird durch Geschlecht, Alter, Masse und Körpergewicht nicht beeinflusst. Eine Erhöhung der Infusionszeit von 5 auf 15 Minuten führte am Ende der Infusion zu einer Abnahme der Zoledronsäurekonzentration um 30 %, hatte aber keinen Einfluss auf das AUC-Zeit-Diagramm.

4

81131785 – Zometa 4 mg/5 ml – 8



Tabelle 4: Ergebnisse zur Wirksamkeit (Patienten mit Mammakarzinom oder multiplem Myelom)

|                                                         | SRE (+ TR)  |           | Frakturen*  |           | Radiotherapie am Knochen |           |
|---------------------------------------------------------|-------------|-----------|-------------|-----------|--------------------------|-----------|
|                                                         | Zometa 4 mg | Pam 90 mg | Zometa 4 mg | Pam 90 mg | Zometa 4 mg              | Pam 90 mg |
| Anzahl (N)                                              | 561         | 555       | 561         | 555       | 561                      | 555       |
| Anzahl Patienten mit SREs (%)                           | 45          | 52        | 37          | 39        | 19                       | 24        |
| p-Wert                                                  | 0,198       |           | 0,653       |           | 0,037                    |           |
| Zeit bis zum Auftreten der ersten SRE in Tagen (Median) | 376         | 356       | NE          | 714       | NE                       | NE        |
| p-Wert                                                  | 0,351       |           | 0,672       |           | 0,026                    |           |
| Skeletale Morbiditätsrate                               | 1,04        | 1,39      | 0,53        | 0,60      | 0,47                     | 0,71      |
| p-Wert                                                  | 0,084       |           | 0,614       |           | 0,015                    |           |
| Rekonduktion gemäß Multiple-Events-Analyse** (%)        | 16          | —         | NZ          | NZ        | NZ                       | NZ        |
| p-Wert                                                  | 0,03        |           | NZ          |           | NZ                       |           |

\* venöse und nicht venöse Frakturen  
 \*\* Alle skeletalen Ereignisse, sowohl gesamte Anzahl als auch Zeit bis zum Erreichen jedes Ereignisses während der Studie  
 NE: Nicht einschätzbar  
 NZ: Nicht zureichend

Tabelle 5: Komplette Ansprechrate pro Tag in den kombinierten TH-Studien

|                            | Tag 4                | Tag 7                | Tag 10               |
|----------------------------|----------------------|----------------------|----------------------|
| Zometa 4 mg (N=86)         | 45,3 %<br>(p=0,104)  | 82,6 %<br>(p=0,005)* | 85,4 %<br>(p=0,002)* |
| Zometa 8 mg (N=90)         | 55,6 %<br>(p=0,021)* | 83,3 %<br>(p=0,010)* | 86,7 %<br>(p=0,015)* |
| Pamidronsäure 90 mg (N=90) | 33,3 %               | 63,6 %               | 69,7 %               |

\* p-Werte im Vergleich zu Pamidronat

Wie bei anderen Bisphosphonaten ist die Variabilität der pharmakokinetischen Parameter von Zoledronsäure zwischen den Patienten hoch.

Pharmakokinetische Daten zu Zoledronsäure bei Patienten mit Hyperkalzämie sowie bei Patienten mit Leberinsuffizienz liegen nicht vor. Zoledronsäure hemmt *in vitro* keine humanen P450-Enzyme und wird nicht metabolisiert. In Tierversuchen wurden < 3 % der verabreichten Dosis in den Fäces wieder gefunden. Dies deutet darauf hin, dass die Leberfunktion keine relevante Rolle für die Pharmakokinetik von Zoledronsäure spielt.

Die renale Clearance von Zoledronsäure korreliert mit der Kreatinin-Clearance. Die renale Clearance entspricht 75 ± 33 % der Kreatinin-Clearance, die bei den 64 untersuchten Tumorkasernen im Mittel bei 84 ± 29 ml/min (von 22 bis 140 ml/min) lag. Eine Populationsanalyse zeigte für Patienten mit einer Kreatinin-Clearance von 20 ml/min (schwere Niereninsuffizienz) bzw. 50 ml/min (mässchwere Niereninsuffizienz), dass die voraussetzbare Clearance von Zoledronsäure 37 % bzw. 72 % gegenüber jenen eines Patienten mit einer Kreatinin-Clearance von

84 ml/min betragen würde. Für Patienten mit schweren Nierenfunktionsstörungen (Kreatinin-Clearance < 30 ml/min) liegen nur wenige pharmakokinetische Daten vor.

Zoledronsäure zeigt keine Affinität zu Erythrozyten. Die Plasmaproteinbindung ist gering (ca. 56 %) und unabhängig von der Zoledronsäure-Konzentration.

5.3 Präklinische Daten zur Sicherheit

**Akute Toxizität:**  
 Die höchste nicht letal wirksame intravenöse Einzeldosis betrug bei Mäusen 10 mg/kg Körpergewicht und bei Ratten 0,6 mg/kg Körpergewicht.

**Subchronische und chronische Toxizität:**  
 bis zu einer täglichen Dosis von 0,02 mg/kg Körpergewicht über 4 Wochen wurde Zoledronsäure nach subkutaner Gabe von Ratten und nach intravenöser Gabe von Mäusen gut vertragen. Die subkutane Anwendung von 0,001 mg/kg/Tag an Ratten und die intravenöse Anwendung von 0,005 mg/kg einmal alle 2–3 Tage an Mäusen über einen Zeitraum von bis zu 52 Wochen wurde ebenfalls gut vertragen.

In den Studien mit wiederholter Gabe war bei nahezu allen Dosierungen der häufigste Befund eine Zunahme des primären Knochengewebes in der Metaphyse langer Knochen bei wachsenden Tieren. Dieser Befund spiegelt die pharmakologische, anxiolytische Wirkung der Substanz wieder.

In den Langzeitstudien mit wiederholter parenteraler Gabe am Tier zeigte sich, dass die Sicherheitsspanne hinsichtlich der renalen Wirkungen klein ist. Die kumulierten NOAELs („no adverse event levels“) in den Studien mit Einzeldosis (1,6 mg/kg) und Mehrfachgabe bis zu einem Monat (0,05–0,6 mg/kg/Tag) ergaben jedoch keine Hinweise auf renale Effekte bei Dosierungen, die der höchsten beabsichtigten therapeutischen Humanosis entsprachen oder diese überstiegen. Langzeitstudienanwendungen bei Dosierungen rund um die höchste geplante therapeutische Humanosis von Zoledronsäure führten zu toxischen Wirkungen in anderen Organen einschließlich Gastrointestinaltrakt, Leber, Milz, Lunge und an der intravenösen Injektionsstelle.

Reproduktionstoxikologie

Bei der Ratte führte die subkutane Gabe von Zoledronsäure bei Dosen von ≥ 0,2 mg/kg zu fetalen Effekten. Obwohl beim Kanarienvogel keine teratogenen oder fetotoxischen Wirkungen beobachtet wurden, kam es zu mütterlichen Effekten.

Mutagenität und Karzinogenität

In den durchgeführten Mutagenitätsstudien erwies sich Zoledronsäure als nicht mutagen. In den Studien zur Karzinogenität gab es keine Hinweise auf ein karzinogenes Potenzial.

6. Pharmazeutische Angaben

6.1 Hilfsstoffe

Mannitol  
 Natriumchlorid  
 Wasser für Injektionszwecke

6.2 Inkompatibilitäten

Um mögliche Inkompatibilitäten zu vermeiden, sollte das Zometa-Konzentrat nur mit 0,9 % w/v Kochsalzlösung oder mit einer 5 % w/v Glukoselösung verdünnt werden.

Das Zometa-Konzentrat darf nicht mit kaliumhaltigen Lösungen wie Ringier-Lösung gemischt werden.

Sowohl Studien mit Glasflaschen als auch mit unterschiedlichen Infusionsbeuteln und Infusionsschläuchen aus Polyvinylchlorid, Polyethylen und Polypropylen (vorgefüllt mit 0,9 % w/v Kochsalzlösung oder 5 % w/v Glukoselösung) zeigten keine Inkompatibilitäten mit Zometa.

6.3 Dauer der Haltbarkeit

3 Jahre  
 Die Zometa-Infusionslösung ist nach Verdünnung mit 100 ml physiologischer Kochsalzlösung oder 5 % w/v Glukoselösung 24 Stunden bei 2–8° C stabil.

6.4 Besondere Lagerungshinweise

Keine besonderen Anforderungen an die Lagerung.

November 2004 / MS 04/53-Vo-NE: 88738

0163058 - Zometa 4 mg/ml - s

5

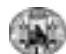



# Zometa® 4 mg/5 ml

Novartis Pharma

Nach aseptischer Verdünnung wird empfohlen, die verdünnte Lösung unverzüglich zu verwenden. Bei nicht sofortiger Verwendung legen die Aufbewahrungszeit und die Aufbewahrungsbedingungen vor der Anwendung in der Verantwortung des Benutzers. Die Zieldauer zwischen Verdünnung, Aufbewahrung in einem Kühlschrank bei 2–8°C und dem Ende der Anwendung darf 24 Stunden nicht übersteigen.

## 6.5 Art und Inhalt des Behältnisses

Zometa 4 mg/5 ml Konzentrat zur Herstellung einer Infusionslösung steht in Packungen mit 1 bzw. 4 bzw. 10 Durchsichtflaschen zur Verfügung. Nicht alle Packungsgrößen müssen sich im Handel befinden.

### Durchsichtflaschen:

5 ml Durchsichtflaschen aus durchsichtigem, farblosem Kunststoff (Cycloolefin-Copolymer) mit einem Fluoropolymerbeschichteten Brombutyl-Gummidichtung und Aluminium-Böckelkappe mit einem Schnappdeckel aus Kunststoff.

## 6.6 Hinweise für die Handhabung

Vor der Anwendung müssen 5 ml Konzentrat aus einer Durchsichtflasche oder die entsprechende annommene Menge an Konzentrat mit 100 ml einer kalziumfreien Infusionslösung (0,9 % w/v Kochsalzlösung oder 5 % w/v Glukoselösung) wasser verdünnt werden. Im Falle einer Kütschenanfertigung muss die gekühlte Lösung vor der Anwendung auf Raumtemperatur gebracht werden.

## 7. Pharmazeutischer Unternehmer

Novartis Europharm Limited  
Wimborne Road  
Horsham  
West Sussex, RH12 5AB  
Vereinigtes Königreich

## 8. Zulassungsnummer

EU/1/01/176/004 – 006

## 9. Datum der Zulassung/ Verlängerung der Zulassung

24. März 2003

## 10. Stand der Information

November 2004

## 11. Verschreibungstatus/ Apothekenpflicht

Verschreibungspflichtig

## 12. Packungsgrößen

Packung mit 1 Durchsichtflasche 

|     |
|-----|
| N 1 |
|-----|

  
Packung mit 4 Durchsichtflaschen 

|     |
|-----|
| N 2 |
|-----|

  
Klinikpackung mit 10 Durchsichtflaschen

## 13. Kontaktadresse in Deutschland

Novartis Pharma GmbH  
90027 Nürnberg

Hausadresse:  
Roosstraße 25  
90429 Nürnberg

Telefon: (09 11) 273-0  
Telefax: (09 11) 273-12 653  
Internet/E-Mail: www.novartispharma.de

Info-Service:  
Telefon: (0 18 02) 23 23 00  
Telefax: (09 11) 273-12 160

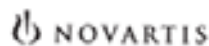

Zentrale Antragsung an:

BPI Service GmbH

FachInfo-Service

Postfach 12 55

65302 Alzenhof

0116X08 - Zometa 4 mg/5 ml - n



## 8.11.8 Lenograstim

Fachinformation

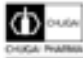

# GRANOCYTE® 13/34 Millionen IE

### 1. BEZEICHNUNG DER ARZNEIMITTEL

GRANOCYTE® 13 Millionen IE, Pulver und Lösungsmittel zur Herstellung einer Injektions- oder Infusionslösung  
GRANOCYTE® 34 Millionen IE, Pulver und Lösungsmittel zur Herstellung einer Injektions- oder Infusionslösung  
Wirkstoff: Lenograstim

### 2. ZUSAMMENSETZUNG UND QUANTITATIVE ZUSAMMENSETZUNG

Lenograstim\* (rHuG-CSF) 134 Millionen IE, äquivalent zu 105 Mikrogramm pro ml nach Rekonstitution.

Lenograstim\* (rHuG-CSF) 336 Millionen IE, äquivalent zu 263 Mikrogramm pro ml nach Rekonstitution.

\* produziert mittels rekombinanter DNA-Technologie in Ovariszellen des chinesischen Hamsters

Sonstige Bestandteile siehe unter Abschnitt 6.1.

### 3. DARREICHUNGSFORM

Pulver und Lösungsmittel zur Herstellung einer Injektions- oder Infusionslösung  
- weißes lyophilisiertes Pulver  
- Lösungsmittel (Wasser für Injektionszwecke)

### 4. KLINISCHE ANGABEN

#### 4.1 Anwendungsgebiete

- Verlängerung der Dauer von Neutropenien bei Patienten mit nicht-myeloischen malignen Erkrankungen, die sich einer myeloablativen Therapie mit anschließender Knochenmarkstransplantation unterziehen und ein erhöhtes Risiko anbauender schwerer Neutropenien aufweisen.
- Verlängerung der Dauer schwerwiegender Neutropenien und Reduktion der sich daraus ergebenden Komplikationen bei Patienten, die sich einer Behandlung mit einem globalem, zytotoxischen Chemotherapeutikum, das mit einer erheblichen Inzidenz an neutropenischem Fieber verknüpft ist, unterziehen.
- Mobilisierung von Blutzustromzellen ins periphere Blut.

#### Hinweis

Die sichere Anwendung von GRANOCYTE® in Verbindung mit antineoplastischen Arzneimitteln, die sich durch eine tumorale Mykotoxizität oder eine Überwiegend gegen die megakaryopoetische Reihe gerichtete Mykotoxizität auszeichnen (Nitrosoureastoff, Mitomycin), ist nicht belegt. Die Anwendung von GRANOCYTE® könnte insbesondere die gegen die Thrombozyten gerichtete Toxizität derartiger Arzneimittel sogar verstärken.

#### 4.2 Dosierung

##### Art und Dauer der Anwendung

Die empfohlene Dosis von GRANOCYTE® beträgt 150 µg (192 Mio. IE) pro m<sup>2</sup> Körperoberfläche (KO) täglich, therapeutisch äquivalent zu 5 µg (64 Mio. IE) pro kg Körpergewicht (KG) täglich, für die Indikationen: Knochenmarkstransplantation, konventionelle zytotoxische Chemotherapie, Mobilisierung von Blutzustromzellen ins periphere Blut nach Chemotherapie.

GRANOCYTE® 13 Millionen IE (134 Mio. IE/Durchstechflasche) kann bei Patienten mit einer Körperoberfläche von bis zu 0,7 m<sup>2</sup> eingesetzt werden.

GRANOCYTE® 34 Millionen IE (336 Mio. IE/Durchstechflasche) kann bei Patienten mit einer Körperoberfläche von bis zu 1,8 m<sup>2</sup> eingesetzt werden.

Zur Mobilisierung von Blutzustromzellen ins periphere Blut bei alleiniger Therapie mit GRANOCYTE® beträgt die empfohlene Dosis 10 µg (128 Mio. IE) pro kg KG täglich.

#### 4.2.1 Erwachsene

##### Bei Knochenmarkstransplantation

GRANOCYTE® sollte täglich in der empfohlenen Dosis von 150 µg (192 Mio. IE) pro m<sup>2</sup> Körperoberfläche (KO) pro Tag als 30-minütige intravenöse Infusion, verdünnt in isotoner Kochsalzlösung oder als subkutane Injektion verabreicht werden, beginnend am Tag nach der Transplantation (s. Abschnitte 4.4 und 4.5).

Die Behandlung sollte fortgesetzt werden, bis der erwartete Nadir durchschritten ist und die Neutrophilenzahlen wieder stabile, die Unterbrechung der Behandlung erlaubende Normwerte erreicht haben, falls nötig bis zu maximal 28 aufeinanderfolgenden Tagen. Es ist zu erwarten, dass am 14. Tag nach der Knochenmarkstransplantation sich die Neutrophilenwerte bei 50 % der Patienten erholt haben.

##### Bei Behandlung mit globalem zytotoxischem Chemotherapeutikum

GRANOCYTE® sollte täglich in der empfohlenen Dosis von 150 µg (192 Mio. IE) pro m<sup>2</sup> KO pro Tag als subkutane Injektion, beginnend am ersten Tag nach Beendigung der Chemotherapie, verabreicht werden (s. Abschnitte 4.4 und 4.5). Die tägliche Verabreichung von GRANOCYTE® sollte so lange fortgesetzt werden, bis der erwartete Nadir durchschritten ist und die Neutrophilenzahlen wieder stabile, die Unterbrechung der Behandlung erlaubende Normwerte erreicht haben, falls nötig bis zu maximal 28 aufeinanderfolgenden Tagen.

Falls eine vorübergehende Erhöhung der Neutrophilenwerte innerhalb der ersten 2 Behandlungstage auftritt, sollte die Behandlung dennoch fortgesetzt werden, da der nachfolgende Neutrophilennadir gewöhnlich früher erreicht wird und die Erholung der Neutrophilenwerte schneller erfolgt.

##### Bei Mobilisierung von Blutzustromzellen ins periphere Blut

Nach Beendigung der Chemotherapie sollte GRANOCYTE® täglich in der empfohlenen Dosis von 150 µg (192 Mio. IE) pro m<sup>2</sup> KO pro Tag als subkutane Injektion, beginnend am ersten Tag nach Beendigung der Chemotherapie verabreicht werden, bis der erwartete Nadir durchschritten ist und die Neutrophilenzahl wieder stabile, die Unterbrechung der Behandlung erlaubende Normwerte erreicht hat.

Nach Bestimmung der CD34<sup>+</sup>-Zellen im Blut mit einer validierten Methode oder bei Anstieg der Leukozytenzahl nach Durchschreiten des Nadirs sollte eine Leukapherese durchgeführt werden. Bei Patienten, die nicht extensiv chemotherapeutisch behan-

delt wurden, ist oftmals nur eine Leukapherese ausreichend, um eine Minimalsubstanz von  $\geq 2,0 \times 10^6$  CD34<sup>+</sup>-Zellen pro kg KG zu erhalten.

Zur Mobilisierung von Blutzustromzellen ins periphere Blut bei alleiniger Therapie mit GRANOCYTE® sollte GRANOCYTE® täglich in der empfohlenen Dosis von 10 µg (128 Mio. IE) pro kg KG pro Tag für die Dauer von 4 bis 6 Tagen als subkutane Injektion verabreicht werden. Die Leukapherese soll zwischen Tag 5 und 7 durchgeführt werden. Bei Patienten, die nicht extensiv chemotherapeutisch behandelt wurden, ist oftmals nur eine Leukapherese ausreichend, um eine Minimalsubstanz von  $\geq 2,0 \times 10^6$  CD34<sup>+</sup>-Zellen pro kg KG zu erhalten.

Bei gesunden Spendern ermöglicht eine tägliche Dosis von 10 µg/kg KG, verabreicht als subkutane Injektion über 5–6 Tage, eine Sammlung von CD34<sup>+</sup>-Zellen  $\geq 3 \times 10^6$  Zellen pro kg KG bei 83 % der Probanden mit einer Leukapherese und bei 97 % der Probanden mit zwei Leukapheresen.

Die Therapie sollte nur in Zusammenarbeit mit einem erfahrenen Onkologie- und/oder Hämatologie-Team durchgeführt werden.

#### 4.2.2 Ältere Patienten

In klinische Studien mit GRANOCYTE® wurde eine kleine Anzahl von Patienten im Alter von bis zu 70 Jahren eingeschlossen. Besonders Studien mit älteren Patienten sind allerdings nicht durchgeführt worden, so dass spezielle Dosierungsempfehlungen nicht gegeben werden können.

#### 4.2.3 Kinder

Bei Knochenmarkstransplantation sind Sicherheit und Wirksamkeit von GRANOCYTE® für Patienten im Alter von über 2 Jahren belegt.

#### 4.3 Gegenanzeigen

GRANOCYTE® darf nicht angewendet werden bei Patienten oder Personen mit einer bekannten Überempfindlichkeit gegen den Wirkstoff oder andere Bestandteile des Präparates.

GRANOCYTE® darf nicht benutzt werden, um die Dosis einer zytotoxischen Chemotherapie über allgemein akzeptierte Dosierungen und Dosierungsschemata hinaus zu steigern, da das Arzneimittel die Mykotoxizität, nicht aber die allgemeine Toxizität zytotoxischer Medikamente vermindern könnte.

GRANOCYTE® soll nicht gleichzeitig mit einer zytotoxischen Chemotherapie angewendet werden.

GRANOCYTE® darf bei folgenden Patienten nicht verabreicht werden:

- bei Patienten mit malignen myeloischen Erkrankungen, die keine neu diagnostizierte akute myeloische Leukämie aufweisen
- bei Patienten mit neu diagnostizierter akuter myeloischer Leukämie im Alter unter 55 Jahren und/oder
- bei Patienten mit neu diagnostizierter akuter myeloischer Leukämie mit guter Zytogenetik, z. B. t(8;21), t(15;17) und r(18)

März 2004

MSL 4403 - GRANOCYTE 13/34 - 4



SUCCESS-Trial, Version 1.2, 15.8.2005

Page 201

Anschrift: D-80337 München • Maistraße 11 • Telefon (0 89) 51 60-4111 (Vermittlung)

# GRANOCYTE® 13/34 Millionen IE

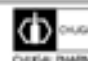

## 4.4 Warnhinweise und Vorsichtsmaßnahmen für die Anwendung

### ● Malignes Zellwachstum

Der Granulozyten-Kolonie-stimulierende Faktor kann das Wachstum von Zellen myeloischen Ursprungs *in vitro* fördern und gleichartige Wirkungen können *in vitro* bei nicht-myeloischen Zellen gesehen werden. Die Sicherheit und Wirksamkeit der Verabreichung von GRANOCYTE® bei Patienten mit Myelodysplasie, sekundärer akuter myeloischer Leukämie oder chronischer myeloischer Leukämie oder chronischer myeloischer Leukämie sind nicht belegt. Deshalb darf GRANOCYTE® in diesen Indikationen nicht eingesetzt werden. Mit besonderer Sorgfalt sollte die Diagnosestellung zur Unterscheidung einer Blastenkrise bei chronischer myeloischer Leukämie von einer akuten myeloischen Leukämie durchgeführt werden.

In klinischen Studien konnte bisher nicht geklärt werden, ob GRANOCYTE® die Progression eines myelodysplastischen Syndroms zur akuten myeloischen Leukämie beeinflusst. Deshalb soll GRANOCYTE® bei prä-malignen myeloischen Zuständen nur mit Vorsicht eingesetzt werden. Da einige Tumoren mit unspezifischen Eigenschaften in Ausnahmefällen einen G-CSF-Rezeptor exprimieren können, ist beim Auftreten eines unerwarteten Tumorwachstums im Zusammenhang mit einer rHuG-CSF-Therapie Vorsicht geboten.

### ● Leukozytose

Leukozytenzahlen von mehr als  $50 \times 10^9/l$  wurden bei keinem der 174 Patienten, die an klinischen Prüfungen teilnahmen und nach Knochenmarkstransplantation mit  $5 \mu g/kg$  KG/Tag ( $0,64 \text{ Mio. IE/kg KG/Tag}$ ) behandelt wurden, beobachtet. Leukozytenzahlen von  $70 \times 10^9/l$  oder mehr wurden bei weniger als 5 % der Patienten, die eine zytotoxische Chemotherapie erhalten hatten und die mit GRANOCYTE® in einer Dosis von  $5 \mu g/kg$  KG/Tag ( $0,64 \text{ Mio. IE/kg KG/Tag}$ ) behandelt worden waren, beobachtet. Über unerwünschte Ereignisse, die direkt diesem Grad der Leukozytose zugeschrieben werden mussten, wurde nicht berichtet. Angesichts des mit einer schweren Leukozytose verknüpften potenziellen Risikos sollen die Leukozytenzahlen jedoch während der Therapie mit GRANOCYTE® regelmäßig kontrolliert werden. Falls die Leukozytenzahlen nach Durchlaufen des erwarteten Nadirs einen Wert von  $50 \times 10^9/l$  überschreiten, muss GRANOCYTE® unverzüglich abgesetzt werden.

Die Verabreichung von GRANOCYTE® sollte unterbrochen werden, wenn unter Gabe von GRANOCYTE® zur Mobilisierung von Blutzellen ins periphere Blut die Anzahl der Leukozyten auf einen Wert von  $>70 \times 10^9/l$  ansteigt.

### ● Lunge

Das Auftreten pulmonaler Anzeichen wie Husten, Fieber und Atemnot in Verbindung mit radiologischen Hinweisen auf pulmonale Infiltrate sowie die Verschlechterung der Lungenfunktion können erste Anzeichen für eine Schocklunge sein. Die Behandlung mit GRANOCYTE® sollte unterbrochen und eine angemessene Therapie eingeleitet werden.

### ● Bei Knochenmarkstransplantation

Besondere Beobachtung muss auf die Erholung der Thrombozytenwerte gelegt werden, da in doppel-blinden, placebo-kontrollierten Studien der Mittelwert der Thrombozytenzahl bei mit GRANOCYTE® behandelten Patienten niedriger war als in der Placebogruppe. Die Wirkung von GRANOCYTE® auf Inzidenz und Schweregrad der akuten oder chronischen Graft-versus-host Erkrankung ist nicht genau bestimmt worden.

### ● bei konventioneller Chemotherapie

Die Behandlung mit GRANOCYTE® wird nicht empfohlen 24 Stunden vor und bis 24 Stunden nach Ende der Chemotherapie (s. Abschnitt 4.5).

### ● Risiken in Verbindung mit einer Chemotherapie in höheren Dosen

Sicherheit und Wirksamkeit von GRANOCYTE® sind im Zusammenhang mit einer intensiveren Chemotherapie noch nicht belegt. GRANOCYTE® darf nicht benutzt werden, um die Intervalle zwischen chemotherapeutischen Zyklen unter die allgemein akzeptierte Dauer hinaus zu verkürzen und/oder die Dosis eines Chemotherapeutikums zu steigern. In einer Phase-I-Studie zur Intensivierung der Chemotherapie mit GRANOCYTE® waren nicht-myeloische toxische Wirkungen die limitierenden Faktoren.

### ● Vorsichtsmaßnahmen bei der Mobilisierung von Blutzellen ins periphere Blut

#### Auswahl der Mobilisierungsmethode

Klinische Prüfungen, die mit demselben Patientenkollektiv durchgeführt und von demselben Laboratorium ausgewertet wurden, zeigen, dass die Mobilisierung von Stammzellen ins periphere Blut größer war, wenn GRANOCYTE® nach Chemotherapie angewandt wurde als wenn GRANOCYTE® allein angewandt wurde. Dennoch sollte bei der Wahl zwischen den beiden Mobilisierungsmethoden das gesamte Behandlungsziel für den individuellen Patienten berücksichtigt werden.

#### Vorherige Behandlung mit Strahlentherapie und/oder zytotoxischen Wirkstoffen

Patienten, die zuvor einer extensiven myelo-suppressiven Therapie und/oder Strahlentherapie ausgesetzt waren, zeigen unter Umständen keine ausreichende Mobilisierung von Blutzellen ins periphere Blut, um die Mindestausbeute ( $\geq 2,0 \times 10^6 \text{ CD34}^+$ -Zellen/kg KG) und damit eine ausreichende hämatologische Rekonstitution zu erreichen. Ein Transplantationsprogramm von peripheren Stammzellen sollte früh im Behandlungsverlauf des Patienten definiert und der Anzahl peripher mobilisierter Stammzellen vor Verabreichung einer hochdosierten Chemotherapie besondere Aufmerksamkeit geschenkt werden. Falls die Werte niedrig sind, sollte dieses Programm durch andere Formen der Behandlung ersetzt werden.

#### Bestimmung der Stammzellausbeuten

Besondere Aufmerksamkeit sollte der Methode der Quantifizierung der Blutzellen geschenkt werden, da die Ergebnisse der Durchflusszytometrischen Analyse für  $\text{CD34}^+$ -Zellen von Labor zu Labor variiert.

Die Mindestausbeute an  $\text{CD34}^+$ -Zellen ist nicht genau definiert. Die Empfehlung einer Mindestausbeute von  $\geq 2,0 \times 10^6 \text{ CD34}^+$ -Zellen/kg KG, um eine adäquate hämatologische Rekonstitution zu erreichen, basiert auf veröffentlichten Erfahrungswerten.  $\text{CD34}^+$ -Werte, die höher als  $2,0 \times 10^6$  Zellen/kg KG liegen, werden mit einer schnelleren Rekonstitution, einschließlich der Rekonstitution der Blutplättchen, in Verbindung gebracht, während niedrigere Werte mit einer langsameren Rekonstitution assoziiert werden.

### ● Bei gesunden Spendern

Die periphere Stammzelltransplantation ist ein Verfahren, das für den gesunden Spender keinen direkten Nutzen hat. Sie sollte nur auf solche Fälle begrenzt werden, die sich in Übereinstimmung mit den lokalen Richtlinien für die Knochenmarkspende befinden, sofern diese anwendbar sind.

Bei Spendern über 60 Jahren wurden Wirksamkeit und Sicherheit von GRANOCYTE® nicht geprüft und die Anwendung kann deshalb nicht empfohlen werden. Aufgrund lokaler Vorschriften und aus Mangel an Studien sollten Kinder als Spender nicht berücksichtigt werden.

Für die Mobilisierung von Blutzellen sind Spender geeignet, die den Einschlusskriterien bezüglich der Labor- und klinischen Parameter für eine Knochenmarkspende genügen und insbesondere die hämatologischen Einschlusskriterien erfüllen.

Eine ausgeprägte Leukozytose (Leukozyten  $\geq 50 \times 10^9/l$ ) wurde bei 24 % der Patienten beobachtet.

Bei 42 % der Versuchspersonen wurden Apherese-bedingte Thrombozytopenien (Thrombozytenwerte  $<100 \times 10^9/l$ ) beobachtet, bei denen gelegentlich Thrombozytenwerte unter  $50 \times 10^9/l$  festgestellt wurden; bei allen Versuchspersonen verliefen die Thrombozytopenien ohne klinische Zeichen und regenerierten. Daher dürfen keine Leukapheren an Spendern durchgeführt werden, die mit Antikoagulantien behandelt werden oder bei denen Hämostasestörungen bekannt sind. Falls mehr als eine Leukaphese notwendig ist, sollte vor der Apherese Spendern mit Thrombozytenwerten  $<100 \times 10^9/l$  besondere Beachtung geschenkt werden. Bei Thrombozytenwerten  $<75 \times 10^9/l$  sollten grundsätzlich keine Apheresen durchgeführt werden. Das Anliegen eines zentral venösen Katheters sollte mit Hinblick auf den venösen Zugang bei der Auswahl der Spender möglichst vermieden werden.

Langzeitbeobachtungen von Spendern liegen für eine kleine Zahl von Versuchspersonen vor. Über einen Zeitraum von bis zu 6 Jahren wurden keine sich entwickelnden Langzeitfolgen gemeldet. Dennoch kann die Möglichkeit der Stimulation eines malignen myeloischen Klonns nicht ausgeschlossen werden. Deshalb wird die systematische Dokumentation der Patientendaten und die Nachbeobachtung durch das Transplantationszentrum empfohlen.

### ● Bei Empfängern allogener, durch GRANOCYTE® mobilisierter, peripherer Stammzellen

Die allogene Stammzelltransplantation kann mit einem höheren Auftreten an chronischen



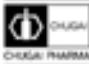

# GRANOCYTE® 13/34 Millionen IE

Transplantat-Wir-Reaktionen in Verbindung stehen, wobei wenige Daten über die Funktion des Transplantates über einen längeren Beobachtungszeitraum vorliegen.

● **Andere Vorsichtsmaßnahmen**

Bei Patienten mit einer schweren Beeinträchtigung der Leber- oder Nierenfunktion sind Sicherheit und Wirksamkeit von GRANOCYTE® nicht belegt.

Bei Patienten mit einer erheblich reduzierten Zahl an Blutzustellen (z. B. wegen einer zuvor erfolgten intensiven Radio- oder Chemotherapie) ist die Erholung der Neutrophilenmauer vermindert. In diesen Fällen wurde die Verträglichkeit von GRANOCYTE® noch nicht belegt.

Häufige aber im allgemeinen asymptomatische Fälle einer Splenomegalie und sehr seltene Fälle einer Milzruptur wurden sowohl bei gesunden Spendern als auch Patienten nach Verabreichung granulocystenstimulierender Faktoren (G-CSF's) berichtet. Deshalb sollte die Milzgröße sorgfältig überwacht werden (z. B. klinische Untersuchung, Ultraschall). Die Diagnose einer Milzruptur sollte erwogen werden, wenn über Schmerzen im linken Oberbauch oder der Schulter Spitze berichtet wird.

**4.5 Wechselwirkungen mit anderen Arzneimitteln und sonstige Wechselwirkungen**

Angeichts der Sensitivität sich nach teilen der Zellen myeloischen Ursprungs gegenüber einer zytotoxischen Chemotherapie, wird die Anwendung von GRANOCYTE® im Zeitraum von 24 Stunden vor bis 24 Stunden nach Ende der Chemotherapie nicht empfohlen (s. Abschnitt 4.4). Mögliche Wechselwirkungen mit anderen hämatopoetischen Wachstumsfaktoren und Zytokinen müssen noch in klinischen Studien untersucht werden.

**4.6 Schwangerschaft und Stillzeit**

● **Schwangerschaft**

Es existieren keine validen Daten über die Anwendung von Lenograstim bei Schwangeren. Tierversuche zeigten eine Toxizität im Hinblick auf die Reproduktionstoxizität (s. Abschnitt 5.3). Das mögliche Risiko beim Menschen ist unbekannt.

GRANOCYTE® sollte nicht in der Schwangerschaft gegeben werden, außer wenn es dringend erforderlich ist.

● **Laktation**

Die Anwendung von GRANOCYTE® bei stillenden Frauen wird nicht empfohlen, da nicht bekannt ist, ob GRANOCYTE® in die menschliche Muttermilch übergeht.

**4.7 Auswirkungen auf die Verkehrstüchtigkeit und das Bedienen von Maschinen**

Keine.

**4.8 Nebenwirkungen**

In der Knochenmarkstransplantation

In doppel-blind, placebo-kontrollierten Studien zeigte sich bei Patienten unter GRANOCYTE® ein niedriger Mittelwert der Thrombozytenzahl als bei Patienten unter Placebo. Damit war jedoch keine Zunahme

der unerwünschten Ereignisse im Hinblick auf den Blutverlust verbunden. Die mediane Anzahl der Tage bis zur letzten Thrombozytentransfusion nach Knochenmarkstransplantation war in beiden Gruppen ähnlich.

In placebo-kontrollierten Studien traten die häufigsten unerwünschten Ereignisse (15 % in mindestens einer Behandlungsgruppe) mit gleicher Häufigkeit bei GRANOCYTE® und Placebo-Patienten auf. Diese unerwünschten Ereignisse entsprachen denen, die üblicherweise bei dem zugrundeliegenden Behandlungsschema zu erwarten sind. Als unerwünschte Ereignisse traten infektiös/entzündliche Erkrankungen der Mundhöhle, Fieber, Durchfall, Ausschlag, abdominale Schmerzen, Erbrechen, Alopecie, Sepsis und Infektion auf.

Bei Chemotherapie-induzierter Neutropenie

Die Sicherheit der Anwendung von GRANOCYTE® in Verbindung mit antineoplastischen Wirkstoffen, die sich durch kumulative Knochenmarktoxizität oder eine Überwindung gegen die megakaryopoetische Reihe gerichtete Toxizität auszeichnen (Neoshamstoff, Mitomycin), ist nicht belegt. Die Anwendung von GRANOCYTE® könnte sogar insbesondere die gegen die Thrombozyten gerichtete Toxizität dieser Arzneimittel verstärken.

In Studien wurde bei Patienten, die mit GRANOCYTE® oder Placebo behandelt wurden, über dieselben häufigsten unerwünschten Ereignisse berichtet. Die häufigsten unerwünschten Ereignisse wie Alopecie, Übelkeit, Erbrechen, Fieber und Kopfschmerzen entsprachen denjenigen, die bei chemotherapeutisch behandelten Krebspatienten auftreten.

Bei den mit GRANOCYTE® behandelten Patienten wurde über eine geringfügig erhöhte Inzidenz (etwa 10 % höher) an Knochenschmerzen sowie lokalen Reaktionen an der Einstichstelle (etwa 5 % höher) berichtet.

Bei der peripheren Blutzustellmobilisierung

Wenn GRANOCYTE® an gesunde Personen verabreicht wird, werden meist Kopfschmerzen in 30 %, Knochenschmerzen in 23 %, Rückenschmerzen in 17,5 %, Asthenie in 11 %, Abdominalschmerz in 6 % und allgemeiner Schmerz in 6 % der Fälle beobachtet. Das Risiko von Schmerzen ist erhöht bei den Personen, die einen hohen Spitzenwert an Leukozyten haben, besonders bei Leukozytenwerten  $\geq 50 \times 10^9/l$ . Leukozytose (Leukozyten  $\geq 50 \times 10^9/l$ ) wurde in 24 % und apheresenbedingte Thrombozytopenie (Blutplättchen  $< 100 \times 10^9/l$ ) bei 42 % der Spender gemeldet. Ein vorübergehender Anstieg der ASAT und/oder ALAT wurde bei 12 % und der alkalischen Phosphatase bei 16 % der Probanden beobachtet.

Andere Nebenwirkungen

● **Immunologische Nebenwirkungen**

In sehr seltenen Fällen wurden allergische Reaktionen, in Einzelfällen bis zum anaphylaktischen Schock unter Behandlung mit GRANOCYTE® beobachtet.

● **Pulmonale, thorakale und mediastinale Nebenwirkungen**

Selten wurden pulmonale Infiltrate beobachtet, die in einigen Fällen bis zur respiratorischen Insuffizienz oder zur Schocklunge (ARDS) führten, die möglicherweise fatal sein können.

● **Nebenwirkungen im Bereich der Haut und des Unterhautgewebes**

Sehr selten wurden kutane Vasculitiden unter GRANOCYTE® beobachtet. In sehr seltenen Fällen traten Fälle von Sweet's Syndrom, Erythema nodosum oder Pyoderma gangrenosum auf. Sie wurden hauptsächlich bei Patienten mit Hämoblastosen beobachtet, die bekanntermaßen mit einer neutrophilen Dermatoze einhergehen, aber auch bei nicht-maligner Neutropenie. In sehr seltenen Fällen trat ein Lyell Syndrom auf.

● **Laborveränderungen**

Sehr häufig tritt eine vorübergehende Erhöhung der Serum-LDH auf, häufig wird eine vorübergehende Erhöhung von ASAT, ALAT und/oder der alkalischen Phosphatase unter Behandlung mit Lenograstim beobachtet. In den meisten Fällen normalisierten sich die Leberfunktionsparameter nach Absetzen von Lenograstim.

Mit: Häufige aber im allgemeinen asymptomatische Fälle einer Splenomegalie und sehr seltene Fälle einer Milzruptur wurden sowohl bei gesunden Spendern als auch Patienten nach Verabreichung von G-CSF's (siehe 4.4).

**4.9 Überdosierung**

Die Auswirkungen einer Überdosierung mit GRANOCYTE® stehen nicht fest (s. Abschnitt 5.3). Das Absetzen von GRANOCYTE® führt üblicherweise innerhalb von 1 bis 2 Tagen zu einem Rückgang der zirkulierenden Neutrophilen um 50 %. Normalwerte werden nach 1 bis 7 Tagen erreicht. Bei einem von drei Patienten, die eine Höchstdosis von 40 µg/kg KG/Tag (5,12 Mio. IE/kg KG/Tag) erhielten, wurde ein Leukozytenwert von  $50 \times 10^9/l$  am 5. Behandlungstag gemessen.

Beim Menschen traten bei Dosierungen bis zu 40 µg/kg KG/Tag außer Schmerzen im Bewegungsapparat keine anderen toxischen Erscheinungen auf.

**5. PHARMAKOLOGISCHE EIGENSCHAFTEN**

**5.1 Pharmakodynamische Eigenschaften**

GRANOCYTE® (rhG-CSF), gelöst in therapeutische Klasse (DS A A10), gehört zu den biologisch aktiven Proteinen der Zytokin-Gruppe, welche die Zelldifferenzierung und das Zellwachstum regulieren.

Bei rhG-CSF handelt es sich um einen Faktor, der die neutrophilen Vorläuferzellen stimuliert. Dies zeigt sich am Anstieg der CFU-S und CFU-GM-Werte im peripheren Blut. GRANOCYTE® induziert innerhalb von 24 Stunden nach Verabreichung einen deutlichen Anstieg der Neutrophilenzahlen im peripheren Blut.

Die Erhöhung der Neutrophilenzahlen ist innerhalb des Bereichs von 1–10 µg/kg KG/Tag dosisabhängig. Bei der empfohlenen

März 2004

1032-9902 - GRANOCYTE 13/34 - 1

3



# GRANOCYTE® 13/34 Millionen IE

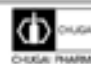

Dosierung induziert die wiederholte Gabe eine Verstärkung der Neutrophilenantwort. Die nach Anwendung von GRANOCYTE® produzierten Neutrophilen zeigen normale chemotaktische und phagozytäre Funktionen. Wie andere hämatopoetische Wachstumsfaktoren haben auch Granulozyten-Kolonie-stimulierende Faktoren stimulierende Eigenschaften bei menschlichen Endothelzellen *in vitro* gezeigt.

Die Anwendung von GRANOCYTE® bei Patienten nach Knochenmarkstransplantation oder nach zytotoxischer Chemotherapie führt zu einer signifikanten Verkürzung der Dauer der Neutropenie und der damit verbundenen Komplikationen.

Die Anwendung von GRANOCYTE® entweder als alleinige Therapie oder nach Chemotherapie dient zur Mobilisierung von Blutzellen in die periphere Blut. Diese Blutzellen können geerntet werden und nach einer hochdosierten Chemotherapie entweder anstelle von oder zusätzlich zu einer Knochenmarkstransplantation infundiert werden. Es konnte gezeigt werden, dass diese reifenden Zellen, die durch Mobilisierung mit GRANOCYTE® gewonnen wurden, die Hämatopoese rekonstruieren, die Zeit zum Anwachsen des Transplantats verkürzen und, verglichen mit einer autologen Knochenmarkstransplantation, zu einer deutlichen Verkürzung der Dauer der Thrombopenie führen.

Zusammengefasste Daten aus 3 doppelblinden, placebo-kontrollierten Studien an 861 Patienten (N=411; > 55 Jahre) ergaben eine vorteilhafte Nutzen-Risikobewertung für die Behandlung mit Lenograsim bei Patienten über 55 Jahre, die sich aufgrund einer neu diagnostizierten akuten myeloischen Leukämie einer konventionellen Chemotherapie zu unterziehen hatten, mit Ausnahme von Patienten mit akuter myeloischer Leukämie mit guter Zytogenetik, z. B. t(8;21) t(15;17) und t(16).

Der Nutzen in der Subgruppe der Patienten über 55 Jahre definierte sich aus dem durch Lenograsim induzierten beschleunigten Anstieg der Neutrophilen, im höheren prozentualen Anteil der Patienten ohne Infektionen, in der geringeren Dauer von Infektionen, in der verringerten Hospitalisationsdauer sowie in der verkürzten Dauer einer i.v. Antibiotikatherapie. Dennoch gingen diese vorteilhaften Ergebnisse weder mit einer Verringerung der Inzidenz schwerer oder lebensbedrohlicher Infektionen noch mit einer verringerten infektionsbedingten Mortalität einher.

Daten aus einer doppelblinden, placebo-kontrollierten Studie an 446 Patienten mit neu diagnostizierter akuter myeloischer Leukämie zeigten für die Subgruppe von 99 Patienten mit guter Zytogenetik eine geringere rezidivfreie Überlebensrate für den Lenograsimarm im Gegensatz zum Placeboarm. Darüber hinaus zeigte sich ein Trend zu einer verkürzten Gesamtüberlebensrate im Lenograsimarm im Vergleich zur Subgruppe mit schlechter Zytogenetik.

## 5.2 Pharmakokinetische Eigenschaften

Die Pharmakokinetik von Lenograsim ist dosis- und zeitabhängig. Nach wiederholter intravenöser und subkutaner Gabe sind die maximalen Serumkonzentrationen (unmittel-

bar nach Beendigung der i.v. Infusion oder der s.c. Injektion) proportional zur applizierten Dosis. Unabhängig von der Art der Anwendung zeigte die wiederholte Gabe von Lenograsim keine Kumulation des Wirkstoffes.

Bei der empfohlenen Dosis beträgt die absolute Bioverfügbarkeit von Lenograsim 30 %. Nach subkutaner Applikation beträgt das apparente Verteilungsvolumen (Vd) etwa 1 l/kg Körpergewicht und die mittlere Verweildauer nach subkutaner Dosierung etwa 7 Stunden. Nach subkutaner Applikation von Lenograsim beträgt die apparente Serum-Eliminationshalbwertszeit etwa 3–4 Stunden im steady state (nach wiederholter Gabe) und ist nach wiederholter i.v. Infusion kürzer (1–1,5 Stunden).

Während wiederholter subkutaner Anwendung steigt die Plasma Clearance von rhG-CSF um das 3fache (von 50 auf bis zu 150 ml/min) an. Weniger als 1 % der verabreichten Dosis von Lenograsim wird unverändert renal ausgeschieden. Es wird angenommen, dass Lenograsim zu Pepsiden metabolisiert wird.

Während wiederholter subkutaner Gabe der empfohlenen Dosis von Lenograsim betragen die maximalen Serumspiegel etwa 100 µg/ml/kg Körpergewicht. Es besteht eine positive Korrelation zwischen der Lenograsim-Dosis und der Serumkonzentration sowie zwischen der Neutrophilen-Antwort und der Gesamtmenge von Lenograsim im Serum.

## 5.3 Präklinische Daten zur Sicherheit

Tierversuche zur akuten Toxizität (bis zu 1000 µg/kg/Tag an Mäusen) und zur subakuten Toxizität (bis zu 100 µg/kg/Tag an Affen) ergaben, dass bei einer Überdosierung die pharmakologischen Wirkungen in gesteigerter Form auftraten und reversibel sind.

Es gibt keine Hinweise aus Studien an Ratten und Kaninchen auf einem teratogenen Effekt von GRANOCYTE®. Eine erhöhte Inzidenz von Aborten wurde bei Kaninchen beobachtet, Missbildungen traten nicht auf.

## 6. PHARMAZEUTISCHE ANGABEN

### 6.1 Sonstige Bestandteile

Pulver  
Arginin  
Phenylalanin  
Methionin  
Mannitol  
Polysorbat 20  
verdünnte Salzlösung

Lösungsmittel  
Wasser für Injektionszwecke

### 6.2 Inkompatibilitäten

Eine Verdünnung von GRANOCYTE® 13 Millionen IE (13,4 Mio. IE/Durchstechflasche) auf eine Endkonzentration unter 0,26 Mio. IE/ml (2 µg/ml) bzw. von GRANOCYTE® 34 Millionen IE (33,6 Mio. IE/Durchstechflasche) auf eine Endkonzentration unter 0,32 Mio. IE/ml (2,5 µg/ml) wird nicht empfohlen.

### 6.3 Dauer der Haltbarkeit

Die Haltbarkeit für GRANOCYTE® beträgt 2 Jahre. Nach Rekonstitution oder Verdünnung wird der umgehende Gebrauch empfohlen.

Jedoch wurde nach Verdünnung auf eine Endkonzentration von nicht weniger als 0,26 Millionen IE/ml (2 µg/ml) die Stabilität für 24 h nachgewiesen, wenn die Lösung von GRANOCYTE® 13 Millionen IE bei 2°C–8°C (im Kühlschrank) aufbewahrt wurde.

Jedoch wurde nach Verdünnung auf eine Endkonzentration von nicht weniger als 0,32 Millionen IE/ml (2,5 µg/ml) die Stabilität für 24 h nachgewiesen, wenn die Lösung von GRANOCYTE® 34 Millionen IE bei 2°C–8°C (im Kühlschrank) aufbewahrt wurde.

### 6.4 Besondere Lagerungshinweise

- Nicht über 30°C lagern
- Nicht einfrieren
- Nach Auflösung oder Verdünnung bei +2°C bis 8°C lagern (im Kühlschrank)
- Nicht benötigte rekonstituierte oder verdünnte Lösungen entsorgen

### 6.5 Art und Inhalt der Behältnisse

#### Packungsgrößen von GRANOCYTE® 13 Millionen IE:

105 µg Pulver zur Herstellung einer Infusions- oder Injektionslösung in einer Durchstechflasche (Typ 1 Glas) mit Gummistopfen (Typ 1 Butyl-Gummi)

+ 1 ml Lösungsmittel in einer vorgefüllten Einmalspritze (Typ 1 Glas)

+ 2 Nadeln

in einer Packung mit 1 oder 5

Klinkpackungen

105 µg Pulver zur Herstellung einer Infusions- oder Injektionslösung in einer Durchstechflasche (Typ 1 Glas) mit Gummistopfen (Typ 1 Butyl-Gummi)

+ 1 ml Lösungsmittel in einer vorgefüllten Einmalspritze (Typ 1 Glas)

+ 2 Nadeln

in einer Packung mit 5 x 1

oder

105 µg Pulver zur Herstellung einer Infusions- oder Injektionslösung in einer Durchstechflasche (Typ 1 Glas) mit Gummistopfen (Typ 1 Butyl-Gummi)

+ 1 ml Lösungsmittel in einer Ampulle (Typ 1 Glas)

in einer Packung mit 5 x 1

#### Packungsgrößen von GRANOCYTE® 34 Millionen IE:

263 µg Pulver zur Herstellung einer Infusions- oder Injektionslösung in einer Durchstechflasche (Typ 1 Glas) mit Gummistopfen (Typ 1 Butyl-Gummi)

+ 1 ml Lösungsmittel in einer vorgefüllten Einmalspritze (Typ 1 Glas)

+ 2 Nadeln

in einer Packung mit 1 oder 5

Klinkpackungen

263 µg Pulver zur Herstellung einer Infusions- oder Injektionslösung in einer Durchstechflasche (Typ 1 Glas) mit Gummistopfen (Typ 1 Butyl-Gummi)

+ 1 ml Lösungsmittel in einer vorgefüllten Einmalspritze (Typ 1 Glas)

+ 2 Nadeln

in einer Packung mit 5 x 1

oder



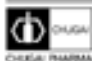

# GRANOCYTE® 13/34 Millionen IE

263 µg Pulver zur Herstellung einer Infusions- oder Injektionslösung in einer Durchstechflasche (Typ 1 Glas) mit Gummistopfen (Typ 1 Butyl-Gummi)  
+ 1 ml Lösungsmittel in einer Ampulle (Typ 1 Glas)  
in einer Packung mit 5 x 1

## 6.6 Hinweise für die Handhabung

Bei GRANOCYTE® Durchstechflaschen handelt es sich um Einzelflaschenbehälter.

**Herstellung der Injektionslösung zur subkutanen Anwendung:**

- Den gesamten entnehmbaren Inhalt (1,05 ml) einer Ampulle oder einer vorgefüllten Einmalspritze mit Lösungsmittel (Wasser für Injektionszwecke) aseptisch mit Hilfe der 19G-Nadel der GRANOCYTE® Durchstechflasche hinzufügen.
- Leicht bewegen bis zur vollständigen Auflösung (etwa 5 Sekunden). Nicht heftig schütteln.
- Das erforderliche Volumen aus der Durchstechflasche mit Hilfe der 19G-Nadel entnehmen.
- Sofort durch subkutane Injektion mit der 26G-Nadel verabreichen.

**Herstellung der Infusionslösung:**

- Den gesamten entnehmbaren Inhalt (1,05 ml) einer Ampulle oder einer vorgefüllten Einmalspritze mit Lösungsmittel (Wasser für Injektionszwecke) aseptisch der GRANOCYTE® Durchstechflasche hinzufügen.
- Leicht bewegen bis zur vollständigen Auflösung (etwa 5 Sekunden). Nicht heftig schütteln.
- Das erforderliche Volumen aus der Durchstechflasche mit Hilfe der 19G-Nadel entnehmen.
- Die resultierende Lösung mit 0,9 % Natriumchlorid- oder mit 5 % Glukoselösung verdünnen.
- Als intravenöse Infusion verabreichen.

Eine Verdünnung von GRANOCYTE® 13 Millionen IE (13,4 Mio. IE/Durchstechflasche) auf eine Endkonzentration von weniger als 0,26 Mio. IE/ml (2 µg/ml) bzw. von GRANOCYTE® 34 Millionen IE (33,6 Mio. IE/Durchstechflasche) auf eine Endkonzentration von weniger als 0,32 Mio. IE/ml (2,5 µg/ml) wird nicht empfohlen.

Auf keinen Fall sollte rekonstituiertes GRANOCYTE® 13 Millionen IE in mehr als 50 ml und GRANOCYTE® 34 Millionen IE in mehr als 100 ml verdünnt werden.

GRANOCYTE® ist verdünnt mit dem gebräuchlichen Infusions-Sets kompatibel.

- in 0,9%iger Natriumchloridlösung (Polyvinylchlorid- oder Glasampullen)
- oder in 5%iger Glukoselösung (Glasampullen)

## 7. PHARMAZEUTISCHER UNTERNEHMER

Chugai Pharma Marketing Ltd.  
Zweigniederlassung Deutschland  
Lyoner Straße 15  
60528 Frankfurt am Main  
Telefon: 069/663 000-0  
Telefax: 069/663 000-50

## 8. ZULASSUNGSNUMMERN

GRANOCYTE® 13 Millionen IE:  
32063.01.00  
GRANOCYTE® 34 Millionen IE:  
28512.00.00

## 9. DATUM DER ZULASSUNG/ VERLÄNGERUNG DER ZULASSUNG

GRANOCYTE® 13 Millionen IE:  
05. 01. 1995/28. 07. 2003  
GRANOCYTE® 34 Millionen IE:  
01. 10. 1993/28. 07. 2003

## 10. STAND DER INFORMATIONEN

März 2004

## 11. VERSCHREIBUNGSSTATUS/ APOTHEKENPFLICHT

Verschreibungspflichtig

Dieses Arzneimittel enthält einen Stoff, dessen Wirkung in der medizinischen Wissenschaft noch nicht allgemein bekannt ist. Deshalb hat der pharmazeutische Unternehmer für dieses Arzneimittel der zuständigen Bundesoberbehörde einen Erfahrungsbericht nach § 49 Abs. 6 AMG vorzulegen.

Zentrale Anforderung an:

BiT Service GmbH

FachInfo-Service

Postfach 12 55

89322 Aulendorf

März 2004

8620-9932 - GRANOCYTE 13/34 - 2

5





## 8.12 Schedule for Necessary Examinations

| Time Examination                                    | Before treatment | Before every cycle                    | 28 days after last chemotherapy | 6 weeks after last radiotherapy | Follow-up                                               |
|-----------------------------------------------------|------------------|---------------------------------------|---------------------------------|---------------------------------|---------------------------------------------------------|
| Demographic Data                                    | X                |                                       |                                 |                                 |                                                         |
| Criteria for inclusion/exclusion                    | X                |                                       |                                 |                                 |                                                         |
| Signed Content Form                                 | X                |                                       |                                 |                                 |                                                         |
| Registration/Randomisation                          | X                |                                       |                                 |                                 |                                                         |
| Medical history                                     | X                | X                                     | X                               | X                               | X                                                       |
| Clinical exam                                       | X                | X                                     | X                               | X                               | X                                                       |
| Concomittent medication                             | X                | X                                     | X                               | X                               | X                                                       |
| Concomittent diseases                               | X                | X                                     | X                               | X                               | X                                                       |
| Status of activity (ECOG)                           | X                | X                                     | X                               | X                               | X                                                       |
| EORTC QLQ-C30 + BR23 Quality of Life-questionnaires | X                | X                                     | X                               | X                               | X                                                       |
| X-ray of the lung, bone scan, sonography of liver   | X                |                                       |                                 |                                 | <i>If needed</i>                                        |
| Peripheral Blood Sampling                           | X                |                                       | X                               |                                 | <i>After 2 years and 5 years of endocrine treatment</i> |
| White blood count                                   | X                | <i>As indicated, appr. 1 – 2/week</i> | X                               |                                 | X                                                       |
| Sodium, Potassium                                   | X                | X                                     | X                               |                                 | X                                                       |
| Creatinine*                                         | X                | X                                     | X                               |                                 | X                                                       |
| Bilirubin, GOT, GPT, γGT, AP                        | X                | X                                     | X                               |                                 | X                                                       |
| Albumine, Protein                                   | X                |                                       | X                               |                                 |                                                         |
| Pregnancy test (premenopausal)                      | X                |                                       | X                               |                                 |                                                         |
| INR, PTT                                            | X                |                                       |                                 |                                 |                                                         |
| EKG                                                 | X                |                                       | X                               |                                 |                                                         |
| Toxicity (NCI)                                      | X                | X                                     | X                               | X                               | X                                                       |
| Status of survival/recurrence                       |                  |                                       | X                               | X                               | X                                                       |

\* *Creatinin-Clearance has to be determined before each Zoledronate treatment (compare dose modification schedule)*



## 9 References

1. Dixon JR, Jr. The International Conference on Harmonization Good Clinical Practice guideline. *Qual.Assur.* 1998;6:65-74.
  2. Taylor CW, Green S, Dalton WS, Martino S, Rector D, Ingle JN et al. Multicenter randomized clinical trial of goserelin versus surgical ovariectomy in premenopausal patients with receptor-positive metastatic breast cancer: an intergroup study. *J Clin.Oncol.* 1998;16:994-9.
  3. Davidson, N., O'Neill, A., Vukov, A., Osborne, C. K., Martino, S., White, D., and Abeloff, M. Chemohormonal therapy in premenopausal node-positive, receptor-positive, breast cancer: an Eastern Cooperative Oncology Group Phase III Intergroup trial (E5188,INT-0101). *Proc Am Soc Clin Oncol* 22. 2003.
- Ref Type: Abstract
4. Sauer R, Schulz KD, Hellriegel KP. [Radiation therapy after mastectomy--interdisciplinary consensus puts and end to a controversy. German Society of Senology]. *Strahlenther.Onkol.* 2001;177:1-9.
  5. Huang EH, Tucker SL, Strom EA, McNeese MD, Kuerer HM, Buzdar AU et al. Postmastectomy radiation improves local-regional control and survival for selected patients with locally advanced breast cancer treated with neoadjuvant chemotherapy and mastectomy. *J.Clin.Oncol.* 2004;22:4639-47.
  6. Recht A, Edge SB, Solin LJ, Robinson DS, Estabrook A, Fine RE et al. Postmastectomy radiotherapy: clinical practice guidelines of the American Society of Clinical Oncology. *J.Clin.Oncol.* 2001;19:1539-69.
  7. Black RJ, Bray F, Ferlay J, Parkin DM. Cancer Incidence and Mortality in the European Union: Cancer Registry Data and Estimates of National Incidence for 1990. *European Journal of Cancer* 1997;33:1075-107.
  8. Bonadonna G, Valagussa P, Brambilla C, Ferrari L, Moliterni A, Terenziani M et al. Primary chemotherapy in operable breast cancer: eight-year experience at the Milan Cancer Institute. *J.Clin Oncol.* 1998;16:93-100.
  9. Bottcher HD.
- Zur Strahlentherapie bei Mamma-Karzinom (Radiation therapy in breast carcinoma). *Zentralbl.Gynakol.* 1991;113:1147-61.
10. Blichert TM, Rose C, Andersen JA, Overgaard M, Axelsson CK, Andersen KW et al. Danish randomized trial comparing breast conservation therapy with mastectomy: six years of life-table analysis. Danish Breast Cancer Cooperative Group. *J Natl.Cancer Inst.Monogr.* 1992;11:19-25.
  11. Fisher B, Redmond C, Poisson R, Margolese R, Wolmark N, Wickerham L et al. Eight-year results of a randomized clinical trial comparing total mastectomy and lumpectomy with or without irradiation in the treatment of breast cancer. *N.Engl.J Med* 1989;320:822-8.
  12. Jacobson JA, Danforth DN, Cowan KH, d'Angelo T, Steinberg SM, Pierce L et al. Ten-year results of a comparison of conservation with mastectomy in the treatment of stage I and II breast cancer. *N.Engl.J Med* 1995;332:907-11.
  13. Sarrazin D, Le MG, Arriagada R, Contesso G, Fontaine F, Spielmann M et al. Ten-year results of a randomized trial comparing a conservative treatment to mastectomy in early breast cancer. *Radiother.Oncol.* 1989;14:177-84.
  14. van-Dongen JA, Bartelink H, Fentiman IS, Lerut T, Mignolet F, Olthuis G et al. Randomized clinical trial to assess the value of breast-conserving therapy in stage I and II breast cancer, EORTC 10801 trial. *J Natl.Cancer Inst.Monogr.* 1992;15-8.
  15. Veronesi U, Salvadori B, Luini A, Greco M, Saccozzi R, Del-Vecchio M et al. Breast conservation is a safe method in patients with small cancer of the breast. Long-term results of three randomised trials on 1,973 patients. *Eur.J Cancer* 1995;31A:1574-9.
  16. Meijer-van-Gelder ME, Look MP, Bolt d, V, Peters HA, Klijn JG, Foekens JA. Breast-conserving therapy: proteases as risk factors in relation to survival after local relapse. *J.Clin.Oncol.* 1999;17:1449-57.
  17. Osborne MP, Ormiston N, Harmer CL, McKinna JA, Baker J, Greening WP. Breast conservation in the treatment of early breast cancer. A 20-year follow-up. *Cancer* 1984;53:349-55.
  18. Veronesi U, Marubini E, Del-Vecchio M, Manzari A, Andreola S, Greco M et al. Local recurrences and distant metastases after conservative breast cancer treatments: partly independent events. *J Natl.Cancer Inst.* 1995;87:19-27.
  19. Goldhirsch A, Wood WC, Gelber RD, Coates AS, Thurlimann B, Senn HJ. Meeting highlights: updated international expert consensus on the primary therapy of early breast cancer. *J.Clin.Oncol.* 2003;21:3357-65.
  20. Arnesson LG, Smeds S, Fagerberg G. Recurrence-free survival in patients with small breast cancer. An analysis of cancers 10 mm or less detected clinically and by screening. *Eur.J Surg.* 1994;160:271-6.
  21. Bonadonna G, Brusamolino E, Valagussa P, Rossi A, Brugnatelli L, Brambilla C et al. Combination chemotherapy as an adjuvant treatment in operable breast cancer. *N.Engl.J Med* 1976;294:405-10.
  22. Bonadonna G, Valagussa P, Moliterni A, Zambetti M, Brambilla C. Adjuvant cyclophosphamide, methotrexate, and fluorouracil in node-positive breast cancer: the results of 20 years of follow-up [see comments]. *N.Engl.J Med* 1995;332:901-6.
  23. Goldhirsch A, Wood WC, Senn HJ, Glick JH, Gelber RD. Meeting highlights: international consensus panel on the treatment of primary breast cancer. *J.Natl.Cancer Inst.* 1995;87:1441-5.
  24. Lenaz L, Page JA. Cardiotoxicity of adriamycin and related anthracyclines. *Cancer Treat.Rev.* 1976;3:111-20.
  25. Early Breast Cancer Trialists' Collaborative Group. Analysis overview results. 21-9-2000. Oxford, Fifth Meeting of the Early Breast Trialists' Collaborative Group.
- Ref Type: Conference Proceeding
26. Levine MN, Bramwell VH, Pritchard KL, Norris B, Shepherd LE, Abu ZH et al. Randomized Trial of Intensive Cyclophosphamide, Epirubicin and Fluorouracil Chemotherapy Compared with Cyclophosphamide, Methotrexate and Fluorouracil in Premenopausal Women With Node-Positive Breast Cancer. *J Clin.Oncol.* 1998;16:2651-8.
  27. EBCTCG. Polychemotherapy for early breast cancer: an overview of the randomised trials. Early Breast Cancer Trialists' Collaborative Group. *Lancet* 1998;352:930-42.
  28. Coombes RC, Bliss JM, Wils J, Morvan F, Espie M, Amadori D et al. Adjuvant cyclophosphamide, methotrexate, and fluorouracil versus fluorouracil, epirubicin, and cyclophosphamide chemotherapy in premenopausal women with axillary node-positive operable breast cancer: results of a randomized trial. The International Collaborative Cancer

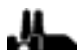



- Group. *J.Clin Oncol.* 1996;14:35-45.
29. Fisher B, Brown AM, Dimitrov NV, Poisson R, Redmond C, Margolese RG et al. Two months of doxorubicin-cyclophosphamide with and without interval reinduction therapy compared with 6 months of cyclophosphamide, methotrexate, and fluorouracil in positive-node breast cancer patients with tamoxifen-nonresponsive tumors: results from the National Surgical Adjuvant Breast and Bowel Project B-15. *J.Clin Oncol.* 1990;8:1483-96.
  30. Bonnetterre, J., Roche, H., Kerbrat, P., Bremond, A., Fumoleau, P., Namer, M., Goudier, M. J., Schraub, S., Fargeot, P., and Charpelle-Margillac, I. French Adjuvant Study Group 05 trial (FEC 50 vs FEC 100): 10-year update of benefit/risk ratio after adjuvant chemotherapy (CT) in node-positive (N+), early breast cancer (EBC) patients (pts). *Proc ASCO* 22, 24. 2003.
- Ref Type: Abstract
31. Bonnetterre J, Roche H, Kerbrat P, Fumoleau P, Goudier MJ, Fargeot P et al. Long-term cardiac follow-up in relapse-free patients after six courses of fluorouracil, epirubicin, and cyclophosphamide, with either 50 or 100 mg of epirubicin, as adjuvant therapy for node-positive breast cancer: French adjuvant study group. *J.Clin Oncol.* 2004;22:3070-9.
  32. Fisher B, Anderson S, Wickerham DL, DeCillis A, Dimitrov N, Mamounas E et al. Increased intensification and total dose of cyclophosphamide in a doxorubicin-cyclophosphamide regimen for the treatment of primary breast cancer: findings from National Surgical Adjuvant Breast and Bowel Project B-22. *J.Clin Oncol.* 1997;15:1858-69.
  33. Fisher B, Anderson S, DeCillis A, Dimitrov N, Atkins JN, Fehrenbacher L et al. Further evaluation of intensified and increased total dose of cyclophosphamide for the treatment of primary breast cancer: findings from National Surgical Adjuvant Breast and Bowel Project B-25. *J.Clin Oncol.* 1999;17:3374-88.
  34. Henderson, C. I., Berry, D., Demetri, G., and et al. Improved disease free and overall survival from the addition of sequential paclitaxel but not from the escalation of doxorubicin dose level in the adjuvant chemotherapy of patients with node-positive cancer. *Proc Am Soc Clin Oncol* (17), 101 A. 1998.
- Ref Type: Abstract
35. Cersosimo RJ, Hong WK. Epirubicin: a review of the pharmacology, clinical activity, and adverse effects of an adriamycin analogue. *J Clin Oncol.* 1986;4:425-39.
  36. Lopez M, Papaldo P, Di-Lauro L, Vici P, Carpano S, Conti EM. 5-Fluorouracil, adriamycin, cyclophosphamide (FAC) vs. 5-fluorouracil, epirubicin, cyclophosphamide (FEC) in metastatic breast cancer. *Oncology* 1989;46:1-5.
  37. Vermorken JB, Bokkel Huinink WW, Mandjes IA, Postma TJ, Huizing MT, Heimans JJ et al. High-dose paclitaxel with granulocyte colony-stimulating factor in patients with advanced breast cancer refractory to anthracycline therapy: a European Cancer Center trial. *Semin Oncol* 1995;22:16-22.
  38. van Oosterom AT, Schrijvers D, Schrijvers D. Docetaxel (Taxotere), a review of preclinical and clinical experience. Part II: Clinical experience. *Anticancer Drugs* 1995;6:356-68.
  39. Chan S, Friedrichs K, Noel D, Pinter T, Van Belle S, Vorobiof D et al. Prospective randomized trial of docetaxel versus doxorubicin in patients with metastatic breast cancer. The 303 Study Group. *J.Clin Oncol* 1999;17:2341-54.
  40. Nabholz, J. M., Falkson, G., and Campos, D. A phase III trial comparing adriamycin and docetaxel to adriamycin and cyclophosphamide as first line chemotherapy for metastatic breast cancer. *Proc Am Soc Clin Oncol* 18. 1999.
- Ref Type: Abstract
41. Nabholz JM, North S, Smylie M, Mackey J, Au HJ, Au R et al. Docetaxel (Taxotere) in combination with anthracyclines in the treatment of breast cancer. *Semin Oncol* 2000;27:11-8.
  42. Nabholz JM, Senn HJ, Bezwoda WR, Melnychuk D, Deschenes L, Douma J et al. Prospective randomized trial of docetaxel versus mitomycin plus vinblastine in patients with metastatic breast cancer progressing despite previous anthracycline-containing chemotherapy. 304 Study Group. *J.Clin Oncol* 1999;17:1413-24.
  43. Bonnetterre J, Dieras V, Tubiana-Hulin M, Bougnoux P, et al. 6 Cycles of Epirubicin/Docetaxel (ET) Versus 6 Cycles of 5FU Epirubicin/Cyclophosphamide (FEC) as First Line Metastatic Breast Cancer (MBC) Treatment. *Proc Am Soc Clin Oncol* 2001;20.
  44. Nabholz, J. M., Paterson, A., Dirix, L., Dewar, J., Chap, L., Chan, S., and et al. A Phase III Randomized Trial Comparing Docetaxel, Doxorubicin and Cyclophosphamide to FAC as First Line Chemotherapy for Patients with Metastatic Breast Cancer. *Proc Am Soc Clin Oncol* 20. 2001.
- Ref Type: Abstract
45. Henderson IC, Berry DA, Demetri GD, Cirincione CT, Goldstein LJ, Martino S et al. Improved outcomes from adding sequential Paclitaxel but not from escalating Doxorubicin dose in an adjuvant chemotherapy regimen for patients with node-positive primary breast cancer. *J Clin Oncol.* 2003;21:976-83.
  46. Mamounas E.P., Bryant, J., Lembersky, C., Fisher, B., Atkins, J. N., Fehrenbacher, L., Raich, P. C., Yother, G., Soran, A., and Wolmark, N. Paclitaxel (T) following doxorubicin/cyclophosphamide (AC) as adjuvant chemotherapy for node-positive breast cancer: Results from NSABP B-28. *Proc ASCO* 22, 4. 2003.
- Ref Type: Abstract
47. Nabholz, J. M., Pienkowsky, T., Mackey, J., Pawlicky, M., Guastalla, J., Vogel, C., Weaver, C., Walley, B, Martin, M., Chap, L., Tomiak, E. M., Juhos, E., Guevin, R., Howell, A., Hainsworth, J., Fornander, T., Blitz, S., Gazel, S., Loret, C., and Riva, A. Phase III Trial comparing TAC (Docetaxel, Doxorubicin, Cyclophosphamide) with FAC (5-Fluorouracil, Doxorubicin, Cyclophosphamide) in the adjuvant treatment of node positive breast cancer patients: interim analysis of the BCIRG 001 Study. *Proc Am Soc Clin Oncol* . 2002.
- Ref Type: Abstract
48. Martin M., Pienkowski T., Mackey J., Pawlicki M., Guastalla J.P., Weaver C.H., Tomiak E., Al-Tweigeri T., Chap L., Juhos E., Guevin R., Howell A., Fornander T., Hainsworth T., Coleman R., Vinholes J., Modiano M., Pinter T., Hugh J., Nabholz J.M., Loret C., Rupin M., Blitz S., Riva A., and Vogel, C. L. TAC Improves DFS and OS Over FAC in Node Positive Early Breast Cancer Patients, BCIRG001: 55 Months Follow-up. *Breast Cancer Res.Treat.* 67((Suppl 1). 2003.
- Ref Type: Abstract
49. Roche, H., Fumoleau, P., Spielmann M., Canon, J. L., Delozier, T., Kerbrat, P., Serin, D., Lortholary, A., de Ghislain, C., Viens, P., Bergerat, J. P., Geneve, J., Martin, A. L., and Asselain, B. Five years analysis of the PACS 01 trial: 6 cycles of FEC100 vs 3 cycles of FEC100 followed by 3 cycles of docetaxel (D) for the adjuvant treatment of node positive breast cancer. *Breast Cancer Res Treat.* 68((Suppl 1). 2004.



Ref Type: Abstract

50. Lohrisch C, Di Leo A, Piccart MJ. Optimal Adjuvant Cytotoxic Therapy for Breast Cancer. In: Wood WC, Henderson CI, Piccart MJ. Adjuvant Therapy for Breast Cancer. ASCO, 2001:61-70.
51. Davidson, N. The use of anthracyclines and taxanes for adjuvant therapy of breast cancer. *The Breast* 10(1). 2001.

Ref Type: Abstract

52. Tripathy D. Overview: gemcitabine as single-agent therapy for advanced breast cancer. *Clin.Breast Cancer* 2002;3 Suppl 1:8-11.
53. Heinemann V. Role of gemcitabine in the treatment of advanced and metastatic breast cancer. *Oncology* 2003;64:191-206.
54. Zielinski CC. Gemcitabine/anthracycline combinations in metastatic breast cancer. *Clin.Breast Cancer* 2002;3 Suppl 1:30-3.
55. Yardley DA. Gemcitabine and taxanes as a new standard of care in breast cancer. *Clin.Breast Cancer* 2004;4 Suppl 3:S107-S112.
56. Laufman LR, Spiridonidis CH, Pritchard J, Roach R, Zangmeister J, Larrimer N et al. Monthly docetaxel and weekly gemcitabine in metastatic breast cancer: a phase II trial. *Ann.Oncol.* 2001;12:1259-64.
57. Vici P, Belli F, Di Lauro L, Amodio A, Conti F, Foggi P et al. Docetaxel in patients with anthracycline-resistant advanced breast cancer. *Oncology* 2001;60:60-5.
58. Fountzilas G, Nicolaides C, Bafaloukos D, Kalogera-Fountzila A, Kalofonos H, Samelis G et al. Docetaxel and gemcitabine in anthracycline-resistant advanced breast cancer: a Hellenic Cooperative Oncology Group Phase II study. *Cancer Invest* 2000;18:503-9.
59. Schneeweiss A, Huober J, Sinn HP, von Fournier D, Rudlowski C, Beldermann F et al. Gemcitabine, epirubicin and docetaxel as primary systemic therapy in patients with early breast cancer: results of a multicentre phase I/II study. *Eur.J.Cancer* 2004;40:2432-8.
60. Mavroudis D, Malamos N, Alexopoulos A, Kourousis C, Agelaki S, Sarra E et al. Salvage chemotherapy in anthracycline-pretreated metastatic breast cancer patients with docetaxel and gemcitabine: a multicenter phase II trial. Greek Breast Cancer Cooperative Group. *Ann.Oncol.* 1999;10:211-5.
61. Alexopoulos A, Tryfonopoulos D, Karamouzis MV, Gerasimidis G, Karydas I, Kandilis K et al. Evidence for in vivo synergism between docetaxel and gemcitabine in patients with metastatic breast cancer. *Ann.Oncol.* 2004;15:95-9.
62. Brandi M, Vici P, Lopez M, Valerio MR, Giotta F, Gebbia N et al. Novel association with gemcitabine and docetaxel as salvage chemotherapy in metastatic breast cancer previously treated with anthracyclines: results of a multicenter phase II study. *Semin.Oncol.* 2004;31:13-9.
63. Murad AM, Guimaraes RC, Aragao BC, Scalabrini-Neto AO, Rodrigues VH, Garcia R. Phase II trial of the use of paclitaxel and gemcitabine as a salvage treatment in metastatic breast cancer. *Am.J.Clin.Oncol.* 2001;24:264-8.
64. Delfino C, Caccia G, Gonzales LR, Mickiewicz E, Rodger J, Balbiani L et al. Gemcitabine plus paclitaxel as first-line chemotherapy for patients with advanced breast cancer. *Oncology* 2004;66:18-23.
65. Genot, J. Y. and Tubiana-Hulin, M. Gemcitabine and paclitaxel in metastatic breast cancer: a phase II study in the first line setting. Proc ASCO . 2002.

Ref Type: Abstract

66. Palmeri, S., Vaglica, M., Accurso, V., and Gebbia, V. Weekly docetaxel (doc)+ gemcitabine (gem) as first line therapy for advanced breast cancer (ABC): a multicenter phase II study. Proc ASCO . 2002.

Ref Type: Abstract

67. Colomer R, Llombart A, Lluch A, Ojeda B, Barnadas A, Caranana V et al. Paclitaxel/gemcitabine administered every two weeks in advanced breast cancer: preliminary results of a phase II trial. *Semin.Oncol.* 2000;27:20-4.
68. Sanchez-Rovira P, Jaen A, Gonzalez E, Porras I, Duenas R, Medina B et al. Biweekly gemcitabine, doxorubicin, and paclitaxel as first-line treatment in metastatic breast cancer. Final results from a phase II trial. *Oncology (Huntingt)* 2001;15:44-7.
69. Kornek GV, Haider K, Kwasny W, Raderer M, Schull B, Payrits T et al. Treatment of advanced breast cancer with docetaxel and gemcitabine with and without human granulocyte colony-stimulating factor. *Clin.Cancer Res* 2002;8:1051-6.
70. Pelegri A, Calvo L, Mayordomo JI, Florian J, Vazquez S, Arcusa A et al. Gemcitabine plus docetaxel administered every other week as first-line treatment of metastatic breast cancer: preliminary results from a phase II trial. *Semin.Oncol.* 2004;31:20-4.
71. Llombart, A., Lluch, A., Ojeda, B., Barnadas, A., Caranana, V., and Fernandez, Y. Paclitaxel and Gemcitabine Administered Every Two Weeks in Advanced Breast Cancer. Proc ASCO . 2000.

Ref Type: Abstract

72. O'Shaughnessy, J., Nag, S., Calderillo-Ruiz, G., Jordaan, J., Llombart, A., Pluzanska, A., Pawlicki M., Reyes, M., Sekhon, J., and Albain, K. Gemcitabine plus paclitaxel (GT) versus paclitaxel (T) as first-line treatment for anthracycline pre-treated metastatic breast cancer (MBC): Interim results of a global phase III study. Proc ASCO . 2003.

Ref Type: Abstract

73. Jaiyesimi IA, Buzdar AU, Decker DA, Hortobagyi GN. Use of tamoxifen for breast cancer: twenty-eight years later [see comments]. *J Clin.Oncol.* 1995;13:513-29.
74. Pritchard KI. Endocrine therapy of advanced disease: analysis and implications of the existing data. *Clin.Cancer Res.* 2003;9:460S-7S.
75. Cuzick J. The ATAC ('Arimidex', Tamoxifen, Alone or in Combination) trial in postmenopausal women with early breast cancer - Updated efficacy results based on a median follow-up of 47 months. *The Breast* 12(Suppl. 1), 47. 2003.

Ref Type: Abstract

76. Howell A. ATAC ('Arimidex', Tamoxifen, Alone or in Combination) completed treatment analysis: Anastrozole demonstrates superior efficacy and tolerability compared with tamoxifen. *Breast Cancer Res Treat. Suppl* 1. 2004.

Ref Type: Abstract

77. Baum M, Budzar AU, Cuzick J, Forbes J, Houghton JH, Klijn JG et al. Anastrozole alone or in combination with tamoxifen versus tamoxifen alone for adjuvant treatment of postmenopausal women with early breast cancer: first



- results of the ATAC randomised trial. *Lancet* 2002;359:2131-9.
78. Coombes RC, Hall E, Gibson LJ, Paridaens R, Jassem J, Delozier T et al. A randomized trial of exemestane after two to three years of tamoxifen therapy in postmenopausal women with primary breast cancer. *N.Engl.J.Med.* 2004;350:1081-92.
  79. Coombes, R. C., Hall, E., Snowdon, C. F., and Bliss, J. M. The Intergroup Exemestane Study: a randomized trial in postmenopausal patients with early breast cancer who remain disease-free after two to three years of tamoxifen-updated survival analysis. *Breast Cancer Res Treat. Suppl* 1(68). 2004.
- Ref Type: Abstract
80. Jakesz, R., Kaufmann, M., Gnant, M., Jonat, W., Mittleboeck, M., Greil, R., Tausch, C., Hilfrich, J., Kwasny, W., and Samonigg, H. Benefits of switching postmenopausal women with hormone-sensitive early breast cancer to anastrozole after 2 years adjuvant tamoxifen: combined results from 3,123 women enrolled in the ABCSG Trial 8 and the ARNO 95 Trial. *Breast Cancer Res Treat. Suppl* 1. 2004.
- Ref Type: Abstract
81. Wood WC. Who Doesn't Need Systemic Adjuvant Therapy, and What is Optimal Endocrine Therapy. In: Wood WC. *Adjuvant Therapy for Breast Cancer.* ASCO, 2001:49-51.
  82. Davidson, N., O'Neill, A., Vukov, A., Osborne, C. K., Martino, S., White, D., and Abeloff, M. Effect of Chemohormonal Therapy in Premenopausal, Node (+), Receptor (+) Breast Cancer: An Eastern Cooperative Oncology Group Phase III Intergroup Trial (E5188, INT-0101). *Proc Am Soc Clin Oncol* 18(67a). 1999.
- Ref Type: Abstract
83. Rutquist, L. Zoladex® and Tamoxifen as Adjuvant Therapy in Premenopausal Breast Cancer: A Randomised Trial by the Cancer Research Campaign (C. R. C.) Breast Cancer Trials Group, the Stockholm Breast Cancer Study Group, The South-East Sweden Breast Cancer Group & the Gruppo Interdisciplinare Valutazione Interventi in Oncologia (G. I. V. I. O). *Proc Am Soc Clin Oncol* 18(67a). 1999.
- Ref Type: Abstract
84. Davidson, N. NIH Consensus Development Conference on Adjuvant Therapy for Breast Cancer. Bethesda, National Institute of Health , 63-66. 2000.
- Ref Type: Abstract
85. Jonat, W. Zoladex (goserelin) vs. CMF as adjuvant therapy in Pre-/perimenopausal early (node positive) breast cancer: Preliminary efficacy - QOL, and BMD results form the ZEBRA study. *Breast Cancer Res Treat* 64(13). 2000.
- Ref Type: Abstract
86. Henderson CI. Endocrine Therapy, Chemotherapy, or Both as Adjuvant Systemic Treatment of Patients with Early Breast Cancer. In: Wood WC. *Adjuvant Therapy for Breast Cancer.* ASCO, 2001.
  87. Cross M, Dexter TM. Growth factors in development, transformation, and tumorigenesis. *Cell* 1991;64:271-80.
  88. Popescu NC, King CR, Kraus MH. Localization of the human erbB-2 gene on normal and rearranged chromosomes 17 to bands q12-21.32. *Genomics* 1989;4:362-6.
  89. Hynes NE, Stern DF. The biology of erbB-2/neu/HER-2 and its role in cancer. *Biochim.Biophys.Acta* 1994;1198:165-84.
  90. Lemoine NR, Staddon S, Dickson C, Barnes DM, Gullick WJ. Absence of activating transmembrane mutations in the c-erbB-2 proto-oncogene in human breast cancer. *Oncogene* 1990;5:237-9.
  91. Pauletti G, Godolphin W, Press MF, Slamon DJ. Detection and quantitation of HER-2/neu gene amplification in human breast cancer archival material using fluorescence in situ hybridization. *Oncogene* 1996;13:63-72.
  92. Slamon DJ, Godolphin W, Jones LA, Holt JA, Wong SG, Keith DE et al. Studies of the HER-2/neu proto-oncogene in human breast and ovarian cancer. *Science* 1989;244:707-12.
  93. Slamon DJ, Clark GM, Wong SG, Levin WJ, Ullrich A, McGuire WL. Human breast cancer: correlation of relapse and survival with amplification of the HER-2/neu oncogene. *Science* 1987;235:177-82.
  94. Bargmann CI, Hung MC, Weinberg RA. Multiple independent activations of the neu oncogene by a point mutation altering the transmembrane domain of p185. *Cell* 1986;45:649-57.
  95. Bargmann CI, Weinberg RA. Oncogenic activation of the neu-encoded receptor protein by point mutation and deletion. *EMBO J.* 1988;7:2043-52.
  96. Di Fiore PP, Pierce JH, Kraus MH, Segatto O, King CR, Aaronson SA. erbB-2 is a potent oncogene when overexpressed in NIH/3T3 cells. *Science* 1987;237:178-82.
  97. Hudziak RM, Schlessinger J, Ullrich A. Increased expression of the putative growth factor receptor p185HER2 causes transformation and tumorigenesis of NIH 3T3 cells. *Proc Natl.Acad Sci U.S.A* 1987;84:7159-63.
  98. Chazin VR, Kaleko M, Miller AD, Slamon DJ. Transformation mediated by the human HER-2 gene independent of the epidermal growth factor receptor. *Oncogene* 1992;7:1859-66.
  99. Muller WJ, Sinn E, Pattengale PK, Wallace R, Leder P. Single-step induction of mammary adenocarcinoma in transgenic mice bearing the activated c-neu oncogene. *Cell* 1988;54:105-15.
  100. Guy CT, Webster MA, Schaller M, Parsons TJ, Cardiff RD, Muller WJ. Expression of the neu protooncogene in the mammary epithelium of transgenic mice induces metastatic disease. *Proc Natl.Acad Sci U.S.A* 1992;89:10578-82.
  101. Drebin JA, Link VC, Greene MI. Monoclonal antibodies reactive with distinct domains of the neu oncogene-encoded p185 molecule exert synergistic anti-tumor effects in vivo. *Oncogene* 1988;2:273-7.
  102. Drebin JA, Link VC, Greene MI. Monoclonal antibodies specific for the neu oncogene product directly mediate anti-tumor effects in vivo. *Oncogene* 1988;2:387-94.
  103. Fendly BM, Winget M, Hudziak RM, Lipari MT, Napier MA, Ullrich A. Characterization of murine monoclonal antibodies reactive to either the human epidermal growth factor receptor or HER2/neu gene product. *Cancer Res* 1990;50:1550-8.
  104. Gusterson BA, Gelber RD, Goldhirsch A, Price KN, Save SJ, Anbazhagan R et al. Prognostic importance of c-erbB-2 expression in breast cancer. International (Ludwig) Breast Cancer Study Group [see comments]. *J.Clin.Oncol.* 1992;10:1049-56.
  105. Press MF, Bernstein L, Thomas PA, Meisner LF, Zhou JY, Ma Y et al. HER-2/neu gene amplification characterized by fluorescence in situ hybridization: poor prognosis in node-negative breast carcinomas. *J.Clin.Oncol.* 1997;15:2894-904.
  106. Revillion F, Bonnetterre J, Peyrat JP. ERBB2 oncogene in human breast cancer and its clinical significance.



- Eur.J.Cancer* 1998;34:791-808.
107. Ross JS, Fletcher JA. The HER-2/neu oncogene in breast cancer: prognostic factor, predictive factor, and target for therapy. *Stem Cells* 1998;16:413-28.
  108. Baselga J, Seidman AD, Rosen PP, Norton L. HER2 overexpression and paclitaxel sensitivity in breast cancer: therapeutic implications. *Oncology* 1997;11:43-8.
  109. Benz CC, Scott GK, Sarup JC, Johnson RM, Tripathy D, Coronado E et al. Estrogen-dependent, tamoxifen-resistant tumorigenic growth of MCF-7 cells transfected with HER2/neu. *Breast Cancer Res Treat.* 1993;24:85-95.
  110. Carlomagno C, Perrone F, Gallo C, De Laurentiis M, Lauria R, Morabito A et al. c-erb B2 overexpression decreases the benefit of adjuvant tamoxifen in early-stage breast cancer without axillary lymph node metastases. *J.Clin.Oncol.* 1996;14:2702-8.
  111. Giai M, Roagna R, Ponzone R, De Bortoli M, Dati C, Sismondi P. Prognostic and predictive relevance of c-erbB-2 and ras expression in node positive and negative breast cancer. *Anticancer Res* 1994;14:1441-50.
  112. Muss HB, Thor AD, Berry DA, Kute T, Liu ET, Koerner F et al. c-erbB-2 expression and response to adjuvant therapy in women with node-positive early breast cancer [see comments] [published erratum appears in N Engl J Med 1994 Jul 21;331(3):211]. *N.Engl.J.Med.* 1994;330:1260-6.
  113. Newby JC, Johnston SR, Smith IE, Dowsett M. Expression of epidermal growth factor receptor and c-erbB2 during the development of tamoxifen resistance in human breast cancer. *Clin.Cancer Res* 1997;3:1643-51.
  114. Paik S, Bryant J, Park C, Fisher B, Tan CE, Hyams D et al. erbB-2 and response to doxorubicin in patients with axillary lymph node-positive, hormone receptor-negative breast cancer [see comments]. *J.Natl.Cancer Inst.* 1998;90:1361-70.
  115. Thor AD, Berry DA, Budman DR, Muss HB, Kute T, Henderson IC et al. erbB-2, p53, and efficacy of adjuvant therapy in lymph node-positive breast cancer [see comments]. *J.Natl.Cancer Inst.* 1998;90:1346-60.
  116. Yu D, Liu B, Tan M, Li J, Wang SS, Hung MC. Overexpression of c-erbB-2/neu in breast cancer cells confers increased resistance to Taxol via mdm-1-independent mechanisms. *Oncogene* 1996;13:1359-65.
  117. Lewis GD, Figari I, Fendly B, Wong WL, Carter P, Gorman C et al. Differential responses of human tumor cell lines to anti-p185HER2 monoclonal antibodies. *Cancer Immunol.Immunother.* 1993;37:255-63.
  118. Shepard HM, Lewis GD, Sarup JC, Fendly BM, Maneval D, Mordenti J et al. Monoclonal antibody therapy of human cancer: taking the HER2 protooncogene to the clinic. *J.Clin.Immunol.* 1991;11:117-27.
  119. Carter P, Presta L, Gorman CM, Ridgway JB, Henner D, Wong WL et al. Humanization of an anti-p185HER2 antibody for human cancer therapy. *Proc Natl.Acad Sci U.S.A* 1992;89:4285-9.
  120. Cobleigh MA, Vogel CL, Tripathy D, Robert NJ, Scholl S, Fehrenbacher L et al. Multinational study of the efficacy and safety of humanized anti-HER2 monoclonal antibody in women who have HER2-overexpressing metastatic breast cancer that has progressed after chemotherapy for metastatic disease. *J.Clin.Oncol.* 1999;17:2639-48.
  121. Liebermann, G., Burchmore, M. J., Ferhenbacher, L., and Cobleigh, M. A. Health-related quality of life of patients with HER2-overexpressing, metastatic breast cancer treated with Herceptin (trastuzumab) as single agent. *Proc Am Soc Clin Oncol* 18, 417. 1999.
- Ref Type: Abstract
122. Vogel CL, Cobleigh MA, Tripathy D, Gutheil JC, Harris LN, Fehrenbacher L et al. First-line, single-agent Herceptin (trastuzumab) in metastatic breast cancer: a priliminary report. *Eur.J.Cancer* 2001;37:S25-S29.
  123. Slamon DJ, Leyland-Jones B, Shak S, Fuchs H, Paton V, Bajamonde A et al. Use of Chemotherapy plus a Monoclonal Antibody against HER2 for Metastatic Breast Cancer That Overexpresses HER2. *N.Engl.J.Med.* 2001;344:783-92.
  124. Mass, R., Press, M. F., Anderson, S., and Slamon, D. J. Improved survival benefit from Herceptin (trastuzumab) and chemotherapy in patients selected by fluorescence in situ hybridization. *Breast Cancer Res Treat.* 65(1). 2001.
- Ref Type: Abstract
125. Fyfe, G., Mass, R., and Slamon, D. J. Survival benefit of Herceptin (trastuzumab) and chemotherapy in older (age>60) patients. *Breast Cancer Res Treat.* 65(1). 2001.
- Ref Type: Abstract
126. Coleman RE. Skeletal complications of malignancy. *Cancer* 1997;80:1588-94.
  127. Yoneda T, Michigami T, Yi B, Williams PJ, Niewolna M, Hiraga T. Use of bisphosphonates for the treatment of bone metastasis in experimental animal models. *Cancer Treat.Rev.* 1999;25:293-9.
  128. Neville-Webbe HL, Holen I, Coleman RE. The anti-tumour activity of bisphosphonates. *Cancer Treat.Rev.* 2002;28:305-19.
  129. Powles T, Paterson S, Kanis JA, McCloskey E, Ashley S, Tidy A et al. Randomized, placebo-controlled trial of clodronate in patients with primary operable breast cancer. *J.Clin.Oncol.* 2002;20:3219-24.
  130. Diel IJ, Solomayer EF, Costa SD, Gollan C, Goerner R, Wallwiener D et al. Reduction in new metastases in breast cancer with adjuvant clodronate treatment. *N.Engl.J.Med.* 1998;339:357-63.
  131. Diel, I., Solomayer, E. F., Gollan, C., Schuetz, F., and Bastert, G. Bisphosphonates in the reduction of metastases in breast cancer – results of the extended follow-up of the first study population. *Proc.ASCO* 82a. 2000.
- Ref Type: Abstract
132. Saarto T, Blomqvist C, Virkkunen P, Elomaa I. Adjuvant clodronate treatment does not reduce the frequency of skeletal metastases in node-positive breast cancer patients: 5-year results of a randomized controlled trial. *J.Clin Oncol* 2001;19:10-7.
  133. Saarto T, Vehmanen L, Virkkunen P, Blomqvist C. Ten-year Follow-up of a Randomized Controlled Trial of Adjuvant Clodronate Treatment in Node-positive Breast Cancer Patients. *Acta Oncol.* 2004;43:650-6.
  134. Rosen LS, Gordon D, Kaminski M, Howell A, Belch A, Mackey J et al. Zoledronic acid versus pamidronate in the treatment of skeletal metastases in patients with breast cancer or osteolytic lesions of multiple myeloma: a phase III, double-blind, comparative trial. *Cancer J.* 2001;7:377-87.
  135. Saad F, Gleason DM, Murray R, Tchekmedyan S, Venner P, Lacombe L et al. A randomized, placebo-controlled trial of zoledronic acid in patients with hormone-refractory metastatic prostate carcinoma. *J.Natl.Cancer Inst.* 2002;94:1458-68.
  136. Saad F, Gleason DM, Murray R, Tchekmedyan S, Venner P, Lacombe L et al. Long-term efficacy of zoledronic acid for the prevention of skeletal complications in patients with metastatic hormone-refractory prostate cancer.



- J.Natl.Cancer Inst.* 2004;96:879-82.
137. Rosen LS, Gordon DH, Dugan W, Jr., Major P, Eisenberg PD, Provencher L et al. Zoledronic acid is superior to pamidronate for the treatment of bone metastases in breast carcinoma patients with at least one osteolytic lesion. *Cancer* 2004;100:36-43.
  138. van der PG, Vloedgraven H, van Beek E, Wee-Pals L, Lowik C, Papapoulos S. Bisphosphonates inhibit the adhesion of breast cancer cells to bone matrices in vitro. *J.Clin.Invest* 1996;98:698-705.
  139. Jagdev SP, Coleman RE, Shipman CM, Rostami H, Croucher PI. The bisphosphonate, zoledronic acid, induces apoptosis of breast cancer cells: evidence for synergy with paclitaxel. *Br.J.Cancer* 2001;84:1126-34.
  140. Kanis JA, McCloskey EV, Powles T, Paterson AH, Ashley S, Spector T. A high incidence of vertebral fracture in women with breast cancer. *Br.J.Cancer* 1999;79:1179-81.
  141. Gnant M., Jakesz R., Mlineritsch B., Luschin-Ebengreuth G., Schmid M., Menzel C., Kubista E., Samonigg H., and Hausmaninger H. Zoledronic acid effectively counteracts cancer treatment induced bone loss (CTIBL) in premenopausal breast cancer patients receiving adjuvant endocrine treatment with goserelin plus anastrozole versus goserelin plus tamoxifen - bone density subprotocol results of a randomized multicenter trial (ABCSC-12). *Breast Cancer Res Treat.* 68(Suppl 1). 2004.
- Ref Type: Abstract
142. Halsted WS. The results of radical operation for the cure of carcinoma of the breast. *Ann.Surg.* 1907;46:1-19.
  143. Morrow M, Harris JR, Schnitt SJ. Local control following breast-conserving surgery for invasive cancer: results of clinical trials. *J.Natl.Cancer Inst.* 1995;87:1669-73.
  144. Moore MP, Kinne DW. The surgical management of primary invasive breast cancer. *CA Cancer J.Clin* 1995;45:279-88.
  145. Henderson IC, Canellos GP. Cancer of the breast: the past decade (first of two parts). *N.Engl.J Med* 1980;302:17-30.
  146. Pierce LJ, Glatstein E. Postmastectomy radiotherapy in the management of operable breast cancer. *Cancer* 1994 1994;74:477-855.
  147. Prosnitz LR, Marks LB. Postmastectomy radiotherapy. *J Clin.Oncol.* 1994;12:1525.
  148. Overgaard M, Hansen PS, Overgaard J, Rose C, Andersson M, Bach F et al. Postoperative radiotherapy in high-risk premenopausal women with breast cancer who receive adjuvant chemotherapy. Danish Breast Cancer Cooperative Group 82b Trial. *N.Engl.J.Med.* 1997;337:949-55.
  149. Easson EC. Postoperative radiotherapy in breast cancer. In: Forrest AP, Kunkler PB. Evolution of Postoperative radiotherapy. Edinburgh: Livingstone, 1968:118-27.
  150. Fisher B, Slack NH, Cavanaugh P, et al. Postoperative Radiotherapy in the treatment of breast cancer. Reults of the NSABP clinical trial. *Ann.Surg.* 1970;172:711-30.
  151. Wallgren A, Arner O, Bergstrom J, Blomstedt B, Granberg PO, Raf L et al. Radiation therapy in operable breast cancer: results from the Stockholm trial on adjuvant radiotherapy. *Int.J.Radiat.Oncol.Biol.Phys.* 1986;12:533-7.
  152. Host H, Brennhovd IO, Loeb M. Postoperative radiotherapy in breast cancer--long-term results from the Oslo study. *Int.J.Radiat.Oncol.Biol.Phys.* 1986;12:727-32.
  153. Bedwinek J. Adjuvant irradiation for early breast cancer. An on-going controversy. *Cancer* 1984;53:729-39.
  154. Griem KL, Henderson IC, Gelman R, Ascoli D, Silver B, Recht A et al. The 5-Year Results of a Randomized Trial of Adjuvant Radiation Therapy After Chemotherapy in Breast Cancer Patients Treated With Mastectomy. *J.Clin.Oncol.* 1987;5:1546-55.
  155. Muss HB. Adjuvant irradiation following mastectomy: where are we? *J.Clin.Oncol.* 1987;5:1500-1.
  156. Janni W, Dimpfl T, Braun S, Knobbe A, Peschers U, Rjosk D et al. Radiotherapy of the chest wall following mastectomy for early-stage breast cancer: impact on local recurrence and overall survival. *Int.J.Radiat.Oncol.Biol.Phys.* 2000;48:967-75.
  157. Recht A, Edge SB, Solin LJ, Robinson DS, Estabrook A, Fine RE et al. Postmastectomy radiotherapy: clinical practice guidelines of the American Society of Clinical Oncology. *J.Clin Oncol.* 2001;19:1539-69.
  158. DeVita VTJ. Breast cancer therapy: exercising all our options. *N Eng J Med* 1989;320:527-9.
  159. Rosner D, Lane WW. Predicting recurrence in axillary-node negative breast cancer patients. *Breast Cancer Res.Treat.* 1993;25:127-39.
  160. Braun S, Pantel K, Muller P, Janni W, Hepp F, Kentenich CR et al. Cytokeratin-positive cells in the bone marrow and survival of patients with stage I, II, or III breast cancer. *N Engl.J Med* 2000;342:525-33.
  161. Cote RJ, Rosen PP, Lesser ML, Old LJ, Osborne MP. Prediction of early relapse in patients with operable breast cancer by detection of occult bone marrow micrometastases. *J.Clin.Oncol.* 1991;9:1749-56.
  162. Diel IJ, Kaufmann M, Costa SD, Holle R, von Minckwitz G, Solomayer EF et al. Micrometastatic breast cancer cells in bone marrow at primary surgery: prognostic value in comparison with nodal status. *J.Natl.Cancer Inst.* 1996;88:1652-8.
  163. Gebauer G, Fehm T, Merkle E, Beck EP, Lang N, Jager W. Epithelial cells in bone marrow of breast cancer patients at time of primary surgery: clinical outcome during long-term follow-up. *J.Clin.Oncol.* 2001;19:3669-74.
  164. Gerber B, Krause A, Muller H, Richter D, Reimer T, Makovitzky J et al. Simultaneous immunohistochemical detection of tumor cells in lymph nodes and bone marrow aspirates in breast cancer and its correlation with other prognostic factors. *J.Clin Oncol* 2001;19:960-71.
  165. Harbeck N, Untch M, Pache L, Eiermann W. Tumour cell detection in the bone marrow of breast cancer patients at primary therapy: results of a 3-year median follow-up. *Br.J.Cancer* 1994;69:566-71.
  166. Landys K, Persson S, Kovarik J, Hultborn R, Holmberg E. Prognostic value of bone marrow biopsy in operable breast cancer patients at the time of initial diagnosis: Results of a 20-year median follow-up. *Breast Cancer Res.Treat.* 1998;49:27-33.
  167. Mansi JL, Gogas H, Bliss JM, Gazet JC, Berger U, Coombes RC. Outcome of primary-breast-cancer patients with micrometastases: a long- term follow-up study. *Lancet* 1999;354:197-202.
  168. Harbeck N, Kates RE, Gauger K, Willems A, Kiechle M, Magdolen V et al. Urokinase-type plasminogen activator (uPA) and its inhibitor PAI-I: novel tumor-derived factors with a high prognostic and predictive impact in breast cancer. *Thromb.Haemost.* 2004;91:450-6.
  169. Hayes DF, Bast RC, Desch CE, Fritsche H, Jr., Kemeny NE, Jessup JM et al. Tumor marker utility grading system: a framework to evaluate clinical utility of tumor markers. *J.Natl.Cancer Inst.* 1996;88:1456-66.



170. Beiske K, Myklebust AT, Aamdal S, Langholm R, Jakobsen E, Fodstad O. Detection of bone marrow metastases in small cell lung cancer patients. Comparison of immunologic and morphologic methods. *Am.J.Pathol.* 1992;141:531-8.
171. Ellis G, Ferguson M, Yamanaka E, Livingston RB, Gown AM. Monoclonal antibodies for detection of occult carcinoma cells in bone marrow of breast cancer patients. *Cancer* 1989;63:2509-14.
172. Funke I, Fries S, Rolle M, Heiss MM, Untch M, Bohmert H et al. Comparative analyses of bone marrow micrometastases in breast and gastric cancer. *Int.J.Cancer* 1996;65:755-61.
173. Braun S, Pantel K. Micrometastatic bone marrow involvement: detection and prognostic significance. *Med Oncol.* 1999;16:154-65.
174. Braun S, Pantel K. Biological characteristics of micrometastatic carcinoma cells in bone marrow. *Curr.Top.Microbiol.Immunol.* 1996;213:163-77.
175. Braun S, Pantel K. Prognostic significance of micrometastatic bone marrow involvement. *Breast Cancer Res.Treat.* 1998;52:201-16.
176. Braun S, Muller M, Hepp F, Schlimok G, Riethmuller G, Pantel K. Re: Micrometastatic breast cancer cells in bone marrow at primary surgery: prognostic value in comparison with nodal status. *J Natl. Cancer Inst.* 1998;90:1099-101.
177. Braun S, Hepp F, Kantenich CR, Janni W, Pantel K, Riethmuller G et al. Monoclonal antibody therapy with edrecolomab in breast cancer patients: monitoring of elimination of disseminated cytokeratin-positive tumor cells in bone marrow. *Clin.Cancer Res.* 1999;5:3999-4004.
178. Braun S, Kantenich C, Janni W, Hepp F, de Waal J, Willgeroth F et al. Lack of effect of adjuvant chemotherapy on the elimination of single dormant tumor cells in bone marrow of high-risk breast cancer patients. *J Clin.Oncol.* 2000;18:80-6.
179. Cote RJ, Beattie EJ, Chaiwun B, Shi SR, Harvey J, Chen SC et al. Detection of occult bone marrow micrometastases in patients with operable lung carcinoma. *Ann.Surg.* 1995;222:415-23.
180. Dearnaley DP, Sloane JP, Ormerod MG, Steele K, Coombes RC, Clink HM et al. Increased detection of mammary carcinoma cells in marrow smears using antisera to epithelial membrane antigen. *Br.J.Cancer* 1981;44:85-90.
181. Janni W, Gastroph S, Hepp F, Kantenich C, Rjosk D, Schindlbeck C et al. Incidence and prognostic significance of an increased number of tumor cells in bone marrow of patients with first recurrence of breast cancer. *Cancer* 2000;88:2252-9.
182. Mansi JL, Easton D, Berger U, Gazet JC, Ford HT, Dearnaley D et al. Bone marrow micrometastases in primary breast cancer: prognostic significance after 6 years' follow-up. *Eur.J.Cancer* 1991;27:1552-5.
183. Myklebust AT, Pharo A, Fodstad O. Effective removal of SCLC cells from human bone marrow. Use of four monoclonal antibodies and immunomagnetic beads. *Br.J.Cancer* 1993;67:1331-6.
184. Osborne MP, Rosen PP. Detection and management of bone marrow micrometastases in breast cancer. *Oncology Huntingt* 1994;8:25-31.
185. Pantel K, Izbicki J, Passlick B, Angstwurm M, Haussinger K, Thetter O et al. Frequency and prognostic significance of isolated tumour cells in bone marrow of patients with non-small-cell lung cancer without overt metastases. *Lancet* 1996;347:649-53.
186. Rye PD, Hoifodt HK, Overli GE, Fodstad O. Immunobead filtration: a novel approach for the isolation and propagation of tumor cells. *Am.J.Pathol.* 1997;150:99-106.
187. Schlimok G, Funke I, Holzmann B, Gottlinger G, Schmidt G, Hauser H et al. Micrometastatic cancer cells in bone marrow: in vitro detection with anti-cytokeratin and in vivo labeling with anti-17-1A monoclonal antibodies. *Proc.Natl.Acad.Sci.U.S.A* 1987;84:8672-6.
188. Wiedswang G, Borgen E, Karesen R, Kvalheim G, Nesland JM, Qvist H et al. Detection of isolated tumor cells in bone marrow is an independent prognostic factor in breast cancer. *J.Clin.Oncol.* 2003;21:3469-78.
189. Doglioni C, Dell'Orto P, Zanetti G, Iuzzolino P, Coggi G, Viale G. Cytokeratin-immunoreactive cells of human lymph nodes and spleen in normal and pathological conditions. An immunocytochemical study. *Virchows Arch.A Pathol.Anat.Histopathol.* 1990;416:479-90.
190. Pantel K, Muller V, Auer M, Nusser N, Harbeck N, Braun S. Detection and clinical implications of early systemic tumor cell dissemination in breast cancer. *Clin.Cancer Res* 2003;9:6326-34.
191. Pantel K, Brakenhoff RH. Dissecting the metastatic cascade. *Nat.Rev.Cancer* 2004;4:448-56.
192. Hermanek P, Hutter RV, Sobin LH, Wittekind C. International Union Against Cancer. Classification of isolated tumor cells and micrometastasis. *Cancer* 1999;86:2668-73.
193. Brugger W, Buhning HJ, Grunebach F, Vogel W, Kaul S, Muller R et al. Expression of MUC-1 epitopes on normal bone marrow: implications for the detection of micrometastatic tumor cells. *J.Clin.Oncol.* 1999;17:1535-44.
194. Bostick PJ, Chatterjee S, Chi DD, Huynh KT, Giuliano AE, Cote R et al. Limitations of specific reverse-transcriptase polymerase chain reaction markers in the detection of metastases in the lymph nodes and blood of breast cancer patients. *J.Clin.Oncol.* 1998;16:2632-40.
195. Krismann M, Todt B, Schroder J, Gareis D, Muller KM, Seeber S et al. Low specificity of cytokeratin 19 reverse transcriptase-polymerase chain reaction analyses for detection of hematogenous lung cancer dissemination. *J.Clin.Oncol.* 1995;13:2769-75.
196. Ruud P, Fodstad O, Hovig E. Identification of a novel cytokeratin 19 pseudogene that may interfere with reverse transcriptase-polymerase chain reaction assays used to detect micrometastatic tumor cells. *Int.J.Cancer* 1999;80:119-25.
197. Traweek ST, Liu J, Battifora H. Keratin gene expression in non-epithelial tissues. Detection with polymerase chain reaction. *Am.J.Pathol.* 1993;142:1111-8.
198. Zippelius A, Kufer P, Honold G, Kollermann MW, Oberneder R, Schlimok G et al. Limitations of reverse-transcriptase polymerase chain reaction analyses for detection of micrometastatic epithelial cancer cells in bone marrow. *J.Clin.Oncol.* 1997;15:2701-8.
199. Cote RJ, Rosen PP, Hakes TB, Sedira M, Bazinet M, Kinne DW et al. Monoclonal antibodies detect occult breast carcinoma metastases in the bone marrow of patients with early stage disease. *Am.J.Surg.Pathol.* 1988;12:333-40.
200. Pantel K, Schlimok G, Angstwurm M, Weckermann D, Schmaus W, Gath H et al. Methodological analysis of immunocytochemical screening for disseminated epithelial tumor cells in bone marrow. *J.Hematother.* 1994;3:165-73.
201. Klein CA, Schmidt KO, Schardt JA, Pantel K, Speicher MR, Riethmuller G. Comparative genomic hybridization, loss of heterozygosity, and DNA sequence analysis of single cells. *Proc.Natl.Acad.Sci.U.S.A* 1999;96:4494-9.

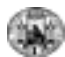

202. Klein CA, Blankenstein TJ, Schmidt-Kittler O, Petronio M, Polzer B, Stoecklein NH et al. Genetic heterogeneity of single disseminated tumour cells in minimal residual cancer. *Lancet* 2002;360:683-9.
203. Mueller P, Carroll P, Bowers E, Moore D, Cher M, Presti J et al. Low frequency epithelial cells in bone marrow aspirates from prostate carcinoma patients are cytogenetically aberrant. *Cancer* 1998;83:538-46.
204. Pantel K, Felber E, Schlimok G. Detection and characterization of residual disease in breast cancer. *J.Hematother.* 1994;3:315-22.
205. Borgen E, Beiske K, Trachsel S, Nesland JM, Kvalheim G, Herstad TK et al. Immunocytochemical detection of isolated epithelial cells in bone marrow: non-specific staining and contribution by plasma cells directly reactive to alkaline phosphatase. *J.Pathol.* 1998;185:427-34.
206. Naume B, Borgen E, Nesland JM, Beiske K, Gilen E, Renolen A et al. Increased sensitivity for detection of micrometastases in bone-marrow/peripheral-blood stem-cell products from breast-cancer patients by negative immunomagnetic separation. *Int.J.Cancer* 1998;78:556-60.
207. Cote, R. J., Shi, S. R., Beattie, E. J., Makarewicz, B., and Chaiwun, B. Automated detection of occult bone marrow micrometastases in patients with operable lung carcinoma. *Proc.ASCO* 16, 458a. 1997.

Ref Type: Abstract

208. Makarewicz, B., McDuffie, L., Shi, S. R., Catterjee, S., Yang, C., and Taylor, C. R. Immunohistochemical detection of occult micrometastases using an automated intelligent microscopy system. *Proc Am Assoc Cancer* 38, 269. 1997.

Ref Type: Abstract

209. Osborne MP, Wong GY, Asina S, Old LJ, Cote RJ, Rosen PP. Sensitivity of immunocytochemical detection of breast cancer cells in human bone marrow. *Cancer Res.* 1991;51:2706-9.
210. Martin VM, Siewert C, Scharl A, Harms T, Heinze R, Ohl S et al. Immunomagnetic enrichment of disseminated epithelial tumor cells from peripheral blood by MACS. *Exp.Hematol.* 1998;26:252-64.
211. Naume B, Borgen E, Beiske K, Herstad TK, Ravnas G, Renolen A et al. Immunomagnetic techniques for the enrichment and detection of isolated breast carcinoma cells in bone marrow and peripheral blood. *J.Hematother.* 1997;6:103-14.
212. Naume B, Borgen E, Nesland JM, Beiske K, Gilen E, Renolen A et al. Increased sensitivity for detection of micrometastases in bone-marrow/peripheral-blood stem-cell products from breast-cancer patients by negative immunomagnetic separation. *Int.J.Cancer* 1998;78:556-60.
213. Racila E, Euhus D, Weiss AJ, Rao C, McConnell J, Terstappen LW et al. Detection and characterization of carcinoma cells in the blood. *Proc.Natl.Acad.Sci.U.S.A* 1998;95:4589-94.
214. Otte, M., Deppert, K., Ebel, S., Hosch, S., Jänicke, F., Izbicki, J., and Pantel, K. Immunomagnetic Enrichment of Disseminated Tumor Cells from Bone Marrow of Carcinoma Patients. *Proc Am Assoc Cancer* 41, 390. 2000.

Ref Type: Abstract

215. Bos JL. Ras oncogenes in human cancer: a review. *Cancer Res.* 1989;49:4682-9.
216. Gribben JG, Freedman AS, Neuberg D, Roy DC, Blake KW, Woo SD et al. Immunologic purging of marrow assessed by PCR before autologous bone marrow transplantation for B-cell lymphoma. *N.Engl.J.Med.* 1991;325:1525-33.
217. Harris CC, Hollstein M. Clinical implications of the p53 tumor-suppressor gene. *N.Engl.J.Med.* 1993;329:1318-27.
218. Hayashi N, Arakawa H, Nagase H, Yanagisawa A, Kato Y, Ohta H et al. Genetic diagnosis identifies occult lymph node metastases undetectable by the histopathological method. *Cancer Res.* 1994;54:3853-6.
219. Riethmuller G, Schneider GE, Schlimok G, Schmiegel W, Raab R, Hoffken K et al. Randomised trial of monoclonal antibody for adjuvant therapy of resected Dukes' C colorectal carcinoma. German Cancer Aid 17-1A Study Group. *Lancet* 1994;343:1177-83.
220. Bostick PJ, Hoon DS, Cote RJ. Detection of carcinoembryonic antigen messenger RNA in lymph nodes from patients with colorectal cancer. *N.Engl.J.Med.* 1998;339:1643-4.
221. Slade MJ, Smith BM, Sinnott HD, Cross NC, Coombes RC. Quantitative polymerase chain reaction for the detection of micrometastases in patients with breast cancer. *J.Clin.Oncol.* 1999;17:870-9.
222. Gerhard M, Juhl H, Kalthoff H, Schreiber HW, Wagener C, Neumaier M. Specific detection of carcinoembryonic antigen-expressing tumor cells in bone marrow aspirates by polymerase chain reaction. *J.Clin.Oncol.* 1994;12:725-9.
223. Ciudad J, San Miguel JF, Lopez-Berges MC, Vidriales B, Valverde B, Ocqueteau M et al. Prognostic value of immunophenotypic detection of minimal residual disease in acute lymphoblastic leukemia. *J.Clin.Oncol.* 1998;16:3774-81.
224. Jennings CD, Foon KA. Recent advances in flow cytometry: application to the diagnosis of hematologic malignancy. *Blood* 1997;90:2863-92.
225. Gross HJ, Verwer B, Houck D, Hoffman RA, Recktenwald D. Model study detecting breast cancer cells in peripheral blood mononuclear cells at frequencies as low as 10<sup>-7</sup>. *Proc.Natl.Acad.Sci.U.S.A* 1995;92:537-41.
226. Molino A, Pelosi G, Turazza M, Sperotto L, Bonetti A, Nortilli R et al. Bone marrow micrometastases in 109 breast cancer patients: correlations with clinical and pathological features and prognosis. *Breast Cancer Res.Treat.* 1997;42:23-30.
227. Vredenburgh JJ, Silva O, Tyer C, DeSombre K, Abou GA, Cook M et al. A comparison of immunohistochemistry, two-color immunofluorescence, and flow cytometry with cell sorting for the detection of micrometastatic breast cancer in the bone marrow. *J.Hematother.* 1996;5:57-62.
228. Wingren S, Guerrieri C, Franlund B, Stal O. Loss of cytokeratins in breast cancer cells using multiparameter DNA flow cytometry is related to both cellular factors and preparation procedure. *Anal.Cell Pathol.* 1995;9:229-33.
229. Ridell B, Landys K. Incidence and histopathology of metastases of mammary carcinoma in biopsies from the posterior iliac crest. *Cancer* 1979;44:1782-8.
230. Braun S, Pantel K. Prognostic significance of micrometastatic bone marrow involvement. *Breast Cancer Res.Treat.* 1998;52:201-16.
231. Pantel K, Felber E, Schlimok G. Detection and characterization of residual disease in breast cancer. *J.Hematother.* 1994;3:315-22.
232. Braun, S., Vogl, F., Schlimok, G., Diel, I., Janni, W., Gerber, B., Gebauer, G, Coombes, R. C., Pierga, J-Y, Naume, B., and Pantel, K. Pooled analysis of prognostic impact of bone marrow micrometastases: 10 year survival 4199 breast cancer patients. *Breast Cancer Res.Treat.* 67((Suppl) 1). 2003.

Ref Type: Abstract



233. Fields KK, Elfenbein GJ, Trudeau WL, Perkins JB, Janssen WE, Moscinski LC. Clinical significance of bone marrow metastases as detected using the polymerase chain reaction in patients with breast cancer undergoing high-dose chemotherapy and autologous bone marrow transplantation. *J Clin Oncol.* 1996;14:1868-76.
234. Datta YH, Adams PT, Drobyski WR, Ethier SP, Terry VH, Roth MS. Sensitive detection of occult breast cancer by the reverse-transcriptase polymerase chain reaction. *J Clin Oncol.* 1994;12:475-82.
235. Vannucchi AM, Bosi A, Glinz S, Pacini P, Linari S, Saccardi R et al. Evaluation of breast tumour cell contamination in the bone marrow and leukapheresis collections by RT-PCR for cytokeratin-19 mRNA. *Br.J.Haematol.* 1998;103:610-7.
236. Courtemanche DJ, Worth AJ, Coupland RW, MacFarlane JK. Detection of micrometastases from primary breast cancer. *Can.J.Surg.* 1991;34:15-9.
237. Porro G, Menard S, Tagliabue E, Orefice S, Salvadori B, Squicciarini P et al. Monoclonal antibody detection of carcinoma cells in bone marrow biopsy specimens from breast cancer patients. *Cancer* 1988;61:2407-11.
238. Salvadori B, Squicciarini P, Rovini D, Orefice S, Andreola S, Rilke F et al. Use of monoclonal antibody MBr1 to detect micrometastases in bone marrow specimens of breast cancer patients. *Eur.J.Cancer* 1990;26:865-7.
239. Untch, M., Kahlert, S., Funke, I., Boettcher, B., Konecny, G., Nestle-Kraemling, C., and Bauernfeind, I. Detection of Cytokeratin (CK) 18 Positive Cells in the Bone Marrow (BM) of Breast Cancer Patients-No Prediction of Bad Outcome. Proc.ASCO 18, 693a. 1999.

Ref Type: Abstract

240. Mathieu MC, Friedman S, Bosq J, Caillou B, Spielmann M, Travagli JP et al. Immunohistochemical staining of bone marrow biopsies for detection of occult metastasis in breast cancer. *Breast Cancer Res.Treat.* 1990;15:21-6.
241. Singletary SE, Larry L, Tucker SL, Spitzer G. Detection of micrometastatic tumor cells in bone marrow of breast carcinoma patients. *J.Surg.Oncol.* 1991;47:32-6.
242. Funke I, Schraut W. Meta-analyses of studies on bone marrow micrometastases: an independent prognostic impact remains to be substantiated. *J.Clin.Oncol.* 1998;16:557-66.
243. Coombes RC, Berger U, Mansi J, Redding H, Powles TJ, Neville AM et al. Prognostic significance of micrometastases in bone marrow in patients with primary breast cancer. *NCI.Monogr* 1986;51-3.
244. Kirk SJ, Cooper GG, Hoper M, Watt PC, Roy AD, Odling-Smee W. The prognostic significance of marrow micrometastases in women with early breast cancer. *Eur.J.Surg.Oncol.* 1990;16:481-5.
245. Dearnaley DP, Ormerod MG, Sloane JP. Micrometastases in breast cancer: long-term follow-up of the first patient cohort. *Eur.J.Cancer* 1991;27:236-9.
246. Untch, M., Kahlert, S., and Funke, I. Detection of cytokeratin (CK) 18 positive cells in the bone marrow of breast cancer patients - no prediction of bad outcome. Proc Am Soc Clin Oncol (18), 693a. 1999.

Ref Type: Abstract

247. Hohaus S, Pforsich M, Murea S, Abdallah A, Lin YS, Funk L et al. Immunomagnetic selection of CD34+ peripheral blood stem cells for autografting in patients with breast cancer. *Br.J.Haematol.* 1997;97:881-8.
248. Janni, W., Rack, B., Schindlbeck, C, Strobl, B., Rjosk, D., Braun, S., Sommer, H, Pantel, K., Gerber, B., and Friese, K. Association of persistence of isolated tumor cells (ITC) in bone marrow (BM) of breast cancer patients with risk for relapse. Proc.ASCO . 2004.

Ref Type: Abstract

249. Janni W, Hepp F, Rjosk D, Kantenich C, Strobl B, Schindlbeck C et al. The fate and prognostic value of occult metastatic cells in the bone marrow of patients with breast carcinoma between primary treatment and recurrence. *Cancer* 2001;92:46-53.
250. Wiedswang G, Borgen E, Karesen R, Qvist H, Janbu J, Kvalheim G et al. Isolated tumor cells in bone marrow three years after diagnosis in disease-free breast cancer patients predict unfavorable clinical outcome. *Clin.Cancer Res* 2004;10:5342-8.
251. Pantel K, Schlimok G, Braun S, Kutter D, Lindemann F, Schaller G et al. Differential expression of proliferation-associated molecules in individual micrometastatic carcinoma cells. *J.Natl.Cancer Inst.* 1993;85:1419-24.
252. Pantel K, Izbicki JR, Angstwurm M, Braun S, Passlick B, Karg O et al. Immunocytological detection of bone marrow micrometastasis in operable non-small cell lung cancer. *Cancer Res.* 1993;53:1027-31.
253. Pantel K, Riethmuller G. Micrometastasis detection and treatment with monoclonal antibodies. *Curr.Top.Microbiol.Immunol.* 1996;213:1-18.
254. Jain RK. Delivery of molecular medicine to solid tumors. *Science* 1996;271:1079-80.
255. Riethmuller G, Holz E, Schlimok G, Schmiegel W, Raab R, Hoffken K et al. Monoclonal antibody therapy for resected Dukes' C colorectal cancer: seven-year outcome of a multicenter randomized trial. *J.Clin.Oncol.* 1998;16:1788-94.
256. Goss PE, Ingle JN, Martino S, Robert NJ, Muss HB, Piccart MJ et al. A randomized trial of letrozole in postmenopausal women after five years of tamoxifen therapy for early-stage breast cancer. *N.Engl.J.Med.* 2003;349:1793-802.
257. Rack, B., Janni, W., Schindlbeck, C, Strobl, B., Blankenstein, T, Rjosk, D., Heinrigs, M, Sommer, H, and Friese, K. Effect of zoledronate on persisting isolated tumor cells (ITC) in the bone marrow (BM) of patients without recurrence of early breast cancer. Proc.ASCO . 2004.

Ref Type: Abstract

258. Ashwort TR. A case of cancer in which cells similar to those in the tumors were seen in the blood after death. *Aust Med J* 1896;14:146.
259. Sanson M. Fait remarquable de diathèse cancéreuse. *Gaz.Med.de Paris* 1834;2:140.
260. Christopherson W. Cancer cells in the peripheral blood: A second look. *Acta Cytol* 1965;9:169-74.
261. Engell HC. Cancer cells in the circulating blood. *Acta Chir Scand* 1955;Supp 201.
262. Moss TJ, Sanders DG. Detection of neuroblastoma cells in blood. *J.Clin.Oncol.* 1990;8:736-40.
263. Redding WH, Coombes RC, Monaghan P, Clink HM, Imrie SF, Dearnaley DP et al. Detection of micrometastases in patients with primary breast cancer. *Lancet* 1983;2:1271-4.
264. Stahel RA, Mabry M, Skarin AT, Speak J, Bernal SD. Detection of bone marrow metastasis in small-cell lung cancer by monoclonal antibody. *J.Clin.Oncol.* 1985;3:455-61.
265. Lee MS, Chang KS, Cabanillas F, Freireich EJ, Trujillo JM, Stass SA. Detection of minimal residual cells carrying the t(14;18) by DNA sequence amplification. *Science* 1987;237:175-8.





266. Negrin RS, Blume KG. The use of the polymerase chain reaction for the detection of minimal residual malignant disease. *Blood* 1991;78:255-8.
267. McCulloch PCAML. Association between tumour angiogenesis and tumour cell shedding into effluent venous blood during breast cancer surgery. *Lancet* 1995;346:1334-5.
268. Kostler WJ, Brodowicz T, Hejna M, Wiltschke C, Zielinski CC. Detection of minimal residual disease in patients with cancer: a review of techniques, clinical implications, and emerging therapeutic consequences. *Cancer Detect.Prev.* 2000;24:376-403.
269. Pantel K, Cote RJ, Fodstad O. Detection and clinical importance of micrometastatic disease. *J Natl.Cancer Inst.* 1999;91:1113-24.
270. Allard WJ, Matera J, Miller MC, Repollet M, Connelly MC, Rao C et al. Tumor cells circulate in the peripheral blood of all major carcinomas but not in healthy subjects or patients with nonmalignant diseases. *Clin.Cancer Res.* 2004;10:6897-904.
271. Krag DN, Ashikaga T, Moss TJ, Kusminsky RE, Feldman S, Carp NZ et al. Breast Cancer Cells in the Blood: A Pilot Study. *Breast J* 1999;5:354-8.
272. Kvalheim G, Naume B, Nesland JM. Minimal residual disease in breast cancer. *Cancer Metastasis Rev.* 1999;18:101-8.
273. Naume B, Borgen E, Beiske K, Herstad TK, Ravnas G, Renolen A et al. Immunomagnetic techniques for the enrichment and detection of isolated breast carcinoma cells in bone marrow and peripheral blood. *J Hematother.* 1997;6:103-14.
274. Racila E, Euhus D, Weiss AJ, Rao C, McConnell J, Terstappen LW et al. Detection and characterization of carcinoma cells in the blood. *Proc.Natl.Acad.Sci.U.S.A* 1998;95:4589-94.
275. Terstappen LW, Rao C, Gross S, Weiss AJ. Peripheral blood tumor cell load reflects the clinical activity of the disease in patients with carcinoma of the breast. *Int.J Oncol.* 2000;17:573-8.
276. Griwatz C, Brandt B, Assmann G, Zanker KS. An immunological enrichment method for epithelial cells from peripheral blood. *J Immunol.Methods* 1995;183:251-65.
277. Martin VM, Siewert C, Scharl A, Harms T, Heinze R, Ohl S et al. Immunomagnetic enrichment of disseminated epithelial tumor cells from peripheral blood by MACS. *Exp.Hematol.* 1998;26:252-64.
278. Dragani A, Angelini A, Iacone A, D'Antonio D, Tortolano G. Comparison of five methods for concentrating progenitor cells in human marrow transplantation. *Blut* 1990;60:278-81.
279. Olofsson T, Gartner I, Olsson I. Separation of human bone marrow cells in density gradients of polyvinylpyrrolidone coated silica gel (Percoll). *Scand J Haematol.* 1980;24:254-62.
280. Giesing M, Austrup F, Bockmann B, Driesel G, Eder C, Kusiak I et al. Independent prognostication and therapy monitoring of breast cancer patients by DNA/RNA typing of minimal residual cancer cells. *Int.J Biol.Markers* 2000;15:94-9.
281. Rosenberg R, Gertler R, Friederichs J, Fuehrer K, Dahm M, Phelps R et al. Comparison of two density gradient centrifugation systems for the enrichment of disseminated tumor cells in blood. *Cytometry* 2002;49:150-8.
282. Baker MK, Mikhitarian K, Osta W, Callahan K, Hoda R, Brescia F et al. Molecular detection of breast cancer cells in the peripheral blood of advanced-stage breast cancer patients using multimarker real-time reverse transcription-polymerase chain reaction and a novel porous barrier density gradient centrifugation technology. *Clin.Cancer Res.* 2003;9:4865-71.
283. Braun S, Hepp F, Kentenich CR, Janni W, Pantel K, Riethmuller G et al. Monoclonal antibody therapy with edrecolomab in breast cancer patients: monitoring of elimination of disseminated cytokeatin-positive tumor cells in bone marrow. *Clin.Cancer Res.* 1999;5:3999-4004.
284. Franklin WA, Shpall EJ, Archer P, Johnston CS, Garza-Williams S, Hami L et al. Immunocytochemical detection of breast cancer cells in marrow and peripheral blood of patients undergoing high dose chemotherapy with autologous stem cell support. *Breast Cancer Res.Treat.* 1996;41:1-13.
285. Brugger W, Bross KJ, Glatt M, Weber F, Mertelsmann R, Kanz L. Mobilization of tumor cells and hematopoietic progenitor cells into peripheral blood of patients with solid tumors. *Blood* 1994;83:636-40.
286. Kim SJ, Ikeda N, Shiba E, Takamura Y, Noguchi S. Detection of breast cancer micrometastases in peripheral blood using immunomagnetic separation and immunocytochemistry. *Breast Cancer* 2001;8:63-9.
287. Kruger WH, Kroger N, Togel F, Renges H, Badbaran A, Hornung R et al. Disseminated breast cancer cells prior to and after high-dose therapy. *J Hematother.Stem Cell Res.* 2001;10:681-9.
288. Smith BM, Slade MJ, English J, Graham H, Luchtenborg M, Sinnott HD et al. Response of circulating tumor cells to systemic therapy in patients with metastatic breast cancer: comparison of quantitative polymerase chain reaction and immunocytochemical techniques. *J Clin.Oncol.* 2000;18:1432-9.
289. Mehes G, Witt A, Kubista E, Ambros PF. Circulating breast cancer cells are frequently apoptotic. *Am.J Pathol.* 2001;159:17-20.
290. Franklin WA, Glaspy J, Pflaumer SM, Jones RB, Hami L, Martinez C et al. Incidence of tumor-cell contamination in leukapheresis products of breast cancer patients mobilized with stem cell factor and granulocyte colony-stimulating factor (G-CSF) or with G-CSF alone. *Blood* 1999;94:340-7.
291. Brugger W, Buhning HJ, Grunebach F, Vogel W, Kaul S, Muller R et al. Expression of MUC-1 epitopes on normal bone marrow: implications for the detection of micrometastatic tumor cells. *J Clin.Oncol.* 1999;17:1535-44.
292. Delsol G, Gatter KC, Stein H, Erber WN, Pulford KA, Zinne K et al. Human lymphoid cells express epithelial membrane antigen. Implications for diagnosis of human neoplasms. *Lancet* 1984;2:1124-9.
293. Pantel K, Schlimok G, Angstwurm M, Weckermann D, Schmaus W, Gath H et al. Methodological analysis of immunocytochemical screening for disseminated epithelial tumor cells in bone marrow. *J Hematother.* 1994;3:165-73.
294. Butler TP, Gullino PM. Quantitation of cell shedding into efferent blood of mammary adenocarcinoma. *Cancer Res.* 1975;35:512-6.
295. Denis MG, Tessier MH, Dreno B, Lustenberger P. Circulating micrometastases following oncological surgery. *Lancet* 1996;347:913.
296. Weitz J, Kienle P, Lacroix J, Willeke F, Benner A, Lehnert T et al. Dissemination of tumor cells in patients undergoing surgery for colorectal cancer. *Clin.Cancer Res.* 1998;4:343-8.
297. Cristofanilli M, Budd GT, Ellis MJ, Stopeck A, Matera J, Miller MC et al. Circulating tumor cells, disease progression,



- and survival in metastatic breast cancer. *N.Engl.J.Med.* 2004;351:781-91.
298. Pery L, Benhattar J, Peters R, Jaunin P, Leyvraz S. High tumour contamination of leukaphereses in patients with small cell carcinoma of the lung: a comparison of immunocytochemistry and RT-PCR. *Br.J.Cancer* 2001;85:1713-21.
  299. Faulkner LB, Tintori V, Tamburini A, Paoli A, Garaventa A, Viscardi E et al. High-sensitivity immunocytologic analysis of neuroblastoma cells in paired blood and marrow samples. *J.Hematother.* 1998;7:361-6.
  300. Taubert H, Blumke K, Bilkenroth U, Meye A, Kutz A, Bartel F et al. Detection of disseminated tumor cells in peripheral blood of patients with breast cancer: correlation to nodal status and occurrence of metastases. *Gynecol.Oncol.* 2004;92:256-61.
  301. Hu XC, Wang Y, Shi DR, Loo TY, Chow LW. Immunomagnetic tumor cell enrichment is promising in detecting circulating breast cancer cells. *Oncology* 2003;64:160-5.
  302. Kraeft SK, Sutherland R, Gravelin L, Hu GH, Ferland LH, Richardson P et al. Detection and analysis of cancer cells in blood and bone marrow using a rare event imaging system. *CLIN.CANC.RES.* 2000;Clinical-Cancer-Research. 2000; 6:2-442.
  303. Witzig TE, Bossy B, Kimlinger T, Roche PC, Ingle JN, Grant C et al. Detection of circulating cytokeratin-positive cells in the blood of breast cancer patients using immunomagnetic enrichment and digital microscopy. *Clin.Cancer Res.* 2002;8:1085-91.
  304. Kahn HJ, Presta A, Yang LY, Blondal J, Trudeau M, Lickley L et al. Enumeration of circulating tumor cells in the blood of breast cancer patients after filtration enrichment: correlation with disease stage. *Breast Cancer Res.Treat.* 2004;86:237-47.
  305. Pierga JY, Bonneton C, Vincent-Salomon A, de Cremoux P, Nos C, Blin N et al. Clinical significance of immunocytochemical detection of tumor cells using digital microscopy in peripheral blood and bone marrow of breast cancer patients. *Clin.Cancer Res.* 2004;10:1392-400.
  306. Muller V, Stahmann N, Riethdorf S, Rau T, Zabel T, Goetz A et al. Circulating tumor cells in breast cancer: correlation to bone marrow micrometastases, heterogeneous response to systemic therapy and low proliferative activity. *Clin.Cancer Res.* 2005;11:3678-85.
  307. Bockmann B, Grill HJ, Giesing M. Molecular characterization of minimal residual cancer cells in patients with solid tumors. *Biomol.Eng* 2001;17:95-111.
  308. Ghossein RA, Rosai J. Polymerase chain reaction in the detection of micrometastases and circulating tumor cells. *Cancer* 1996;78:10-6.
  309. Raj GV, Moreno JG, Gomella LG. Utilization of polymerase chain reaction technology in the detection of solid tumors. *Cancer* 1998;82:1419-42.
  310. Bostick PJ, Chatterjee S, Chi DD, Huynh KT, Giuliano AE, Cote R et al. Limitations of specific reverse-transcriptase polymerase chain reaction markers in the detection of metastases in the lymph nodes and blood of breast cancer patients. *J.Clin.Oncol.* 1998;16:2632-40.
  311. Kruger W, Krzizanowski C, Holweg M, Stockschlader M, Kroger N, Jung R et al. Reverse transcriptase/polymerase chain reaction detection of cytokeratin-19 mRNA in bone marrow and blood of breast cancer patients. *J.Cancer Res.Clin.Oncol.* 1996;122:679-86.
  312. Schoenfeld A, Kruger KH, Gomm J, Sinnett HD, Gazet JC, Sacks N et al. The detection of micrometastases in the peripheral blood and bone marrow of patients with breast cancer using immunohistochemistry and reverse transcriptase polymerase chain reaction for keratin 19. *Eur.J.Cancer* 1997;33:854-61.
  313. Slade MJ, Smith BM, Sinnett HD, Cross NC, Coombes RC. Quantitative polymerase chain reaction for the detection of micrometastases in patients with breast cancer. *J.Clin.Oncol.* 1999;17:870-9.
  314. Austrup F, Uciechowski P, Eder C, Bockmann B, Suchy B, Driesel G et al. Prognostic value of genomic alterations in minimal residual cancer cells purified from the blood of breast cancer patients. *Br.J.Cancer* 2000;83:1664-73.
  315. Goeminne JC, Guillaume T, Salmon M, Machiels JP, D'Hondt V, Symann M. Unreliability of carcinoembryonic antigen (CEA) reverse transcriptase-polymerase chain reaction (RT-PCR) in detecting contaminating breast cancer cells in peripheral blood stem cells due to induction of CEA by growth factors. *Bone Marrow Transplant.* 1999;24:769-75.
  316. Soria JC, Gauthier LR, Raymond E, Granotier C, Morat L, Armand JP et al. Molecular detection of telomerase-positive circulating epithelial cells in metastatic breast cancer patients. *Clin.Cancer Res.* 1999;5:971-5.
  317. Taback B, Chan AD, Kuo CT, Bostick PJ, Wang HJ, Giuliano AE et al. Detection of occult metastatic breast cancer cells in blood by a multimolecular marker assay: correlation with clinical stage of disease. *Cancer Res.* 2001;61:8845-50.
  318. Wasserman L, Dreilinger A, Easter D, Wallace A. A seminested RT-PCR assay for HER2/neu: initial validation of a new method for the detection of disseminated breast cancer cells. *Mol.Diagn.* 1999;4:21-8.
  319. Corradini P, Voena C, Astolfi M, Delloro S, Pilotti S, Arrigoni G et al. Maspin and mammaglobin genes are specific markers for RT-PCR detection of minimal residual disease in patients with breast cancer. *Ann.Oncol.* 2001;12:1693-8.
  320. Mori M, Mimori K, Ueo H, Tsuji K, Shiraishi T, Barnard GF et al. Clinical significance of molecular detection of carcinoma cells in lymph nodes and peripheral blood by reverse transcription-polymerase chain reaction in patients with gastrointestinal or breast carcinomas. *J.Clin.Oncol.* 1998;16:128-32.
  321. Zach O, Kasparu H, Krieger O, Hehenwarter W, Girschikofsky M, Lutz D. Detection of circulating mammary carcinoma cells in the peripheral blood of breast cancer patients via a nested reverse transcriptase polymerase chain reaction assay for mammaglobin mRNA. *J.Clin.Oncol.* 1999;17:2015-9.
  322. Zou Z, Anisowicz A, Hendrix MJ, Thor A, Neveu M, Sheng S et al. Maspin, a serpin with tumor-suppressing activity in human mammary epithelial cells. *Science* 1994;263:526-9.
  323. Sabbatini R, Federico M, Morselli M, Depenni R, Cagossi K, Luppi M et al. Detection of circulating tumor cells by reverse transcriptase polymerase chain reaction of maspin in patients with breast cancer undergoing conventional-dose chemotherapy. *J.Clin.Oncol.* 2000;18:1914-20.
  324. Silva AL, Tome MJ, Correia AE, Passos-Coelho JL. Human mammaglobin RT-PCR assay for detection of occult breast cancer cells in hematopoietic products. *Ann.Oncol.* 2002;13:422-9.
  325. Schroder CP, Ruiters MH, de Jong S, Tiebosch AT, Wesseling J, Veenstra R et al. Detection of micrometastatic breast cancer by means of real time quantitative RT-PCR and immunostaining in perioperative blood samples and sentinel nodes. *Int.J.Cancer* 2003;106:611-8.
  326. de Cremoux P, Extra JM, Denis MG, Pierga JY, Boursstyn E, Nos C et al. Detection of MUC1-expressing mammary



- carcinoma cells in the peripheral blood of breast cancer patients by real-time polymerase chain reaction. *Clin.Cancer Res.* 2000;6:3117-22.
327. De Luca A, Pignata S, Casamassimi A, D'Antonio A, Gridelli C, Rossi A et al. Detection of circulating tumor cells in carcinoma patients by a novel epidermal growth factor receptor reverse transcription-PCR assay. *Clin.Cancer Res.* 2000;6:1439-44.
  328. Grunewald K, Haun M, Urbanek M, Fiegl M, Muller-Holzner E, Gunsilius E et al. Mammaglobin gene expression: a superior marker of breast cancer cells in peripheral blood in comparison to epidermal-growth-factor receptor and cytokeratin-19. *Lab Invest* 2000;80:1071-7.
  329. Kahn HJ, Yang LY, Blondal J, Lickley L, Holloway C, Hanna W et al. RT-PCR amplification of CK19 mRNA in the blood of breast cancer patients: correlation with established prognostic parameters. *Breast Cancer Res.Treat.* 2000;60:143-51.
  330. Wong IH, Yeo W, Chan AT, Johnson PJ. Quantitative correlation of cytokeratin 19 mRNA level in peripheral blood with disease stage and metastasis in breast cancer patients: potential prognostic implications. *Int.J.Oncol.* 2001;18:633-8.
  331. Weigelt B, Bosma AJ, Hart AA, Rodenhuis S, 't Veer LJ. Marker genes for circulating tumour cells predict survival in metastasized breast cancer patients. *Br.J.Cancer* 2003;88:1091-4.
  332. Stathopoulou A, Gizi A, Perraki M, Apostolaki S, Malamos N, Mavroudis D et al. Real-time quantification of CK-19 mRNA-positive cells in peripheral blood of breast cancer patients using the lightcycler system. *Clin.Cancer Res.* 2003;9:5145-51.
  333. Gross HJ, Verwer B, Houck D, Hoffman RA, Recktenwald D. Model study detecting breast cancer cells in peripheral blood mononuclear cells at frequencies as low as 10<sup>-7</sup>. *Proc.Natl.Acad.Sci.U.S.A* 1995;92:537-41.
  334. Terstappen LW, Rao C, Gross S, Kotelnikov V, Racilla E, Uhr J et al. Flow cytometry--principles and feasibility in transfusion medicine. Enumeration of epithelial derived tumor cells in peripheral blood. *Vox Sang.* 1998;74 Suppl 2:269-74.:269-74.
  335. Beitsch PD, Clifford E. Detection of carcinoma cells in the blood of breast cancer patients. *Am.J Surg.* 2000;180:446-8.
  336. Mancuso P, Burlini A, Pruneri G, Goldhirsch A, Martinelli G, Bertolini F. Resting and activated endothelial cells are increased in the peripheral blood of cancer patients. *Blood* 2001;97:3658-61.
  337. Greer GF, WHL. A clonogenic culture method for the identification of breast cancer cells in marrow aspirates of patients receiving high-dose chemotherapy. *Blood* 1996;88:252.
  338. Ross AA, Cooper BW, Lazarus HM, Mackay W, Moss TJ, Ciobanu N et al. Detection and viability of tumor cells in peripheral blood stem cell collections from breast cancer patients using immunocytochemical and clonogenic assay techniques. *Blood* 1993;82:2605-10.
  339. Sharp JG, Mann SL, Murphy B, Weekes C. Culture methods for the detection of minimal tumor contamination of hematopoietic harvests: a review. *J Hematother.* 1995;4:141-8.
  340. Manni A, Wright C, Hsu CJ, Hammond JM. Polyamines and autocrine control of tumor growth by prolactin in experimental breast cancer in culture. *Endocrinology* 1986;119:2033-7.
  341. Aapro MS, Eliason JF, Krauer F, Alberto P. Colony formation in vitro as a prognostic indicator for primary breast cancer. *J Clin.Oncol.* 1987;5:890-6.
  342. Beckmann MW, von Minkwitz G, Pfisterer J, Schnürch H-G, Kreienberg R, Bastert G. Stellungnahme der Arbeitsgemeinschaft Gynäkologische Onkologie (AGO): Nachsorge beim Mammakarzinom und bei gynäkologischen Malignomen - "To follow-up or not to follow-up". *Geb Fra* 2003;63:725-30.
  343. Smith TJ, Davidson NE, Schapira DV, Grunfeld E, Muss HB, Vogel VG, III et al. American Society of Clinical Oncology 1998 update of recommended breast cancer surveillance guidelines. *J.Clin. Oncol.* 1999;17:1080-2.
  344. Devine PL, Duroux MA, Ouin RJ, McGuckin MA, Joy GJ, Ward BG et al. CA15-3, CASA, MSA, and TPS as diagnostic serum markers in breast cancer. *Breast Cancer Res.Treat.* 1995;Breast-Cancer-Research-and-Treatment. 1995; 34:3-251.
  345. Hayes DF, Bast RC, Desc CE, Fritsche H, Kemeny NE, Jessup JM et al. Tumor marker utility grading system: A framework to evaluate clinical utility of tumor markers. *J.NATL.CANCER INST.* 1996;Journal-of-the-National-Cancer-Institute. 1996; 88:20-1466.
  346. Emens LA, Davidson NE. The follow-up of breast cancer. *Semin.Oncol.* 2003;30:338-48.
  347. Gion M, Mione R, Leon AE, Luftner D, Molina R, Possinger K et al. CA27.29: a valuable marker for breast cancer management. A confirmatory multicentric study on 603 cases. *EUR.J.CANCER* 2001;37:355-63.
  348. Chan DW, Beveridge RA, Muss H, Fritsche HA, Hortobagyi G, Theriault R et al. Use of truquant BR radioimmunoassay for early detection of breast cancer recurrence in patients with stage II and stage III disease. *J.Clin.Oncol.* 1997;Journal-of-Clinical-Oncology. 1997; 15:6-2328.
  349. Gion M, Boracchi P, Dittadi R, Biganzoli E, Peloso L, Mione R et al. Prognostic role of serum CA15.3 in 362 node-negative breast cancers. An old player for a new game. *EUR.J.CANCER* 2002;European-Journal-of-Cancer. 2002; 38:9-1188.
  350. Bast RC, Jr., Ravdin P, Hayes DF, Bates S, Fritsche H, Jr., Jessup JM et al. 2000 update of recommendations for the use of tumor markers in breast and colorectal cancer: clinical practice guidelines of the American Society of Clinical Oncology. *J.Clin. Oncol.* 2001;19:1865-78.
  351. Beveridge RA. Review of clinical studies of CA 27.29 in breast cancer management. *INT.J.BIOL.MARKERS* 1999;14:36-9.
  352. Rosselli DT, Palli D, Cariddi A, Ciatto S, Pacini P, Distante V. Intensive diagnostic follow-up after treatment of primary breast cancer. A randomized trial. National Research Council Project on Breast Cancer follow-up. *JAMA* 1994;271:1593-7.
  353. Impact of follow-up testing on survival and health-related quality of life in breast cancer patients. A multicenter randomized controlled trial. The GIVIO Investigators. *JAMA* 1994;271:1587-92.
  354. Rojas MP, Telaro E, Russo A, Fossati R, Confalonieri C, Liberati A. Follow-up strategies for women treated for early breast cancer. *Cochrane.Database.Syst.Rev.* 2000;CD001768.
  355. Grunfeld E, Gray A, Mant D, Yudkin P, Adewuyi-Dalton R, Coyle D et al. Follow-up of breast cancer in primary care vs specialist care: results of an economic evaluation. *Br.J.Cancer* 1999;79:1227-33.



356. Gulliford T, Opomu M, Wilson E, Hanham I, Epstein R. Popularity of less frequent follow up for breast cancer in randomised study: initial findings from the hotline study. *BMJ* 1997;314:174-7.
357. Allard WJ, Hayes DF, Repollet MI et al. A cellular preservative improves the specificity and yield of circulating tumor cells in carcinoma patients. Proceedings of the 39th Annual Meeting of the American Society of Clinical Oncology 22. 3-6-2003.

Ref Type: Abstract

358. Allard WJ, Matera J, Miller MC, Repollet M, Connelly MC, Rao C et al. Tumor cells circulate in the peripheral blood of all major carcinomas but not in healthy subjects or patients with nonmalignant diseases. *Clin. Cancer Res.* 2004;10:6897-904.
359. Choesmel V, Pierga JY, Nos C, Vincent-Salomon A, Sigal-Zafrani B, Thiery JP et al. Enrichment methods to detect bone marrow micrometastases in breast carcinoma patients: clinical relevance. *Breast Cancer Res.* 2004;6:R556-R570.
360. Mitas M, Hoover L, Silvestri G, Reed C, Green M, Turrisi AT et al. Lunx is a superior molecular marker for detection of non-small cell lung cancer in peripheral blood [corrected]. *J. Mol. Diagn.* 2003;5:237-42.
361. Leers MPG, Schoffelen RHMG, Hoop JGM, Theunissen PHMH, Oosterhuis JWA, Bijl HV et al. Multiparameter flow cytometry as a tool for the detection of micrometastatic tumour cells in the sentinel lymph node procedure of patients with breast cancer. *Journal of Clinical Pathology* 2002;55:359-66.
362. Leslie DS, Johnston WW, Daly L, Ring DB, Shpall EJ, Peters WP et al. Detection of Breast-Carcinoma Cells in Human Bone-Marrow Using Fluorescence-Activated Cell Sorting and Conventional Cytology. *American Journal of Clinical Pathology* 1990;94:8-13.
363. Beitsch PD, Clifford E. Detection of carcinoma cells in the blood of breast cancer patients. *American Journal of Surgery* 2000;180:446-8.
364. Gross HJ, Verwer B, Houck D, Hoffman RA, Recktenwald D. Model Study Detecting Breast-Cancer Cells in Peripheral-Blood Mononuclear-Cells at Frequencies As Low As 10(-7). *Proceedings of the National Academy of Sciences of the United States of America* 1995;92:537-41.
365. Cruz I, Ciudad J, Cruz JJ, Ramos M, Gomez-Alonso A, Adansa JC et al. Evaluation of multiparameter flow cytometry for the detection of breast cancer tumor cells in blood samples. *American Journal of Clinical Pathology* 2005;123:66-74.
366. Klee GG, Schreiber WE. MUC1 gene-derived glycoprotein assays for monitoring breast cancer (CA 15-3, CA 27.29, BR): are they measuring the same antigen? *Arch. Pathol. Lab Med.* 2004;128:1131-5.
367. van de Vijver MJ, He YD, van't Veer LJ, Dai H, Hart AA, Voskuil DW et al. A gene-expression signature as a predictor of survival in breast cancer. *N.Engl.J.Med.* 2002;347:1999-2009.
368. 't Veer LJ, Dai H, van de Vijver MJ, He YD, Hart AA, Mao M et al. Gene expression profiling predicts clinical outcome of breast cancer. *Nature* 2002;415:530-6.
369. Royer I, Monsarrat B, Sonnier M, Wright M, Cresteil T. Metabolism of docetaxel by human cytochromes P450: interactions with paclitaxel and other antineoplastic drugs. *Cancer Res.* 1996;56:58-65.
370. Lee BC, Lee SC, Wang LZ, Fan L, Guo JY, Lamba J et al. Explaining interindividual variability of docetaxel pharmacokinetics and pharmacodynamics in Asians through phenotyping and genotyping strategies. *J. Clin. Oncol.* 2002;20:3683-90.
371. Dai D, Tang J, Rose R, Hodgson E, Bienstock RJ, Mohrenweiser HW et al. Identification of variants of CYP3A4 and characterization of their abilities to metabolize testosterone and chlorpyrifos. *J. Pharmacol. Exp. Ther.* 2001;299:825-31.
372. Innocenti F, Iyer L, Ramirez J, Green MD, Ratain MJ. Epirubicin glucuronidation is catalyzed by human UDP-glucuronosyltransferase 2B7. *Drug Metab Dispos.* 2001;29:686-92.
373. Wiener D, Fang JL, Dossett N, Lazarus P. Correlation between UDP-glucuronosyltransferase genotypes and 4-(methylnitrosamino)-1-(3-pyridyl)-1-butanone glucuronidation phenotype in human liver microsomes. *Cancer Res.* 2004;64:1190-6.
374. Duguay Y, Baar C, Skorpen F, Guillemette C. A novel functional polymorphism in the uridine diphosphate-glucuronosyltransferase 2B7 promoter with significant impact on promoter activity. *Clin. Pharmacol. Ther.* 2004;75:223-33.
375. Bhasker CR, McKinnon W, Stone A, Lo AC, Kubota T, Ishizaki T et al. Genetic polymorphism of UDP-glucuronosyltransferase 2B7 (UGT2B7) at amino acid 268: ethnic diversity of alleles and potential clinical significance. *Pharmacogenetics* 2000;10:679-85.
376. Hirota T, Ieiri I, Takane H, Sano H, Kawamoto K, Aono H et al. Sequence variability and candidate gene analysis in two cancer patients with complex clinical outcomes during morphine therapy. *Drug Metab Dispos.* 2003;31:677-80.
377. Fukunaga AK, Marsh S, Murry DJ, Hurley TD, McLeod HL. Identification and analysis of single-nucleotide polymorphisms in the gemcitabine pharmacologic pathway. *Pharmacogenomics.J.* 2004;4:307-14.
378. Chang TK, Weber GF, Crespi CL, Waxman DJ. Differential activation of cyclophosphamide and ifosfamide by cytochromes P-450 2B and 3A in human liver microsomes. *Cancer Res.* 1993;53:5629-37.
379. Shimada T, Yamazaki H, Mimura M, Inui Y, Guengerich FP. Interindividual variations in human liver cytochrome P-450 enzymes involved in the oxidation of drugs, carcinogens and toxic chemicals: studies with liver microsomes of 30 Japanese and 30 Caucasians. *J. Pharmacol. Exp. Ther.* 1994;270:414-23.
380. Mimura M, Baba T, Yamazaki H, Ohmori S, Inui Y, Gonzalez FJ et al. Characterization of cytochrome P-450 2B6 in human liver microsomes. *Drug Metab Dispos.* 1993;21:1048-56.
381. Goldstein DB, Tate SK, Sisodiya SM. Pharmacogenetics goes genomic. *Nat. Rev. Genet.* 2003;4:937-47.
382. Paik S, Shak S, Tang G, Kim C, Baker J, Cronin M et al. A multigene assay to predict recurrence of tamoxifen-treated, node-negative breast cancer. *N.Engl.J.Med.* 2004;351:2817-26.
383. Hampl M, Hampl JA, Reiss G, Schackert G, Saeger HD, Schackert HK. Loss of heterozygosity accumulation in primary breast carcinomas and additionally in corresponding distant metastases is associated with poor outcome. *Clin. Cancer Res.* 1999;5:1417-25.
384. Sato T, Tanigami A, Yamakawa K, Akiyama F, Kasumi F, Sakamoto G et al. Allelotype of breast cancer: cumulative allele losses promote tumor progression in primary breast cancer. *Cancer Res.* 1990;50:7184-9.
385. Jahr S, Hentze H, Englisch S, Hardt D, Fackelmayer FO, Hesch RD et al. DNA fragments in the blood plasma of



- cancer patients: quantitations and evidence for their origin from apoptotic and necrotic cells. *Cancer Res.* 2001;61:1659-65.
386. Schwarzenbach H, Muller V, Stahmann N, Pantel K. Detection and characterization of circulating microsatellite-DNA in blood of patients with breast cancer. *Ann.N.Y.Acad.Sci.* 2004;1022:25-32.:25-32.
  387. Anker P, Lefort F, Vasioukhin V, Lyautey J, Lederrey C, Chen XQ et al. K-ras mutations are found in DNA extracted from the plasma of patients with colorectal cancer. *Gastroenterology* 1997;112:1114-20.
  388. Chen XQ, Stroun M, Magnenat JL, Nicod LP, Kurt AM, Lyautey J et al. Microsatellite alterations in plasma DNA of small cell lung cancer patients. *Nat.Med.* 1996;2:1033-5.
  389. Nawroz H, Koch W, Anker P, Stroun M, Sidransky D. Microsatellite alterations in serum DNA of head and neck cancer patients. *Nat.Med.* 1996;2:1035-7.
  390. Silva JM, Silva J, Sanchez A, Garcia JM, Dominguez G, Provencio M et al. Tumor DNA in plasma at diagnosis of breast cancer patients is a valuable predictor of disease-free survival. *Clin.Cancer Res.* 2002;8:3761-6.
  391. Leon SA, Shapiro B, Sklaroff DM, Yaros MJ. Free DNA in the serum of cancer patients and the effect of therapy. *Cancer Res.* 1977;37:646-50.
  392. Stroun M, Anker P, Lyautey J, Lederrey C, Maurice PA. Isolation and characterization of DNA from the plasma of cancer patients. *Eur.J.Cancer Clin.Oncol.* 1987;23:707-12.
  393. Singletary ES, Allred C, Ashley P., Bassett LW, Berry D, Bland KI et al. Revision of the American Joint Committee on Cancer Staging System for Breast Cancer. *J.Clin.Oncol.* 2002;20:3628-36.
  394. Slapak CA, Kufe DW. Principles of Cancer Therapy. In: Isselbacher KJ, Braunwald E, Wilson JD, Martin JB, Fauci AS, Kasper DL. Harrison's Principle of Internal Medicine, 13 ed. New York: McGraw-Hill, 1994:1826-39.
  395. Jensen BV, Skovsgaard T, Nielsen D. Functional monitoring of anthracycline cardiotoxicity: a prospective, blinded, long-term observational study of outcome in 120 patients. *Annals of Oncology* 2002;13:699-709.
  396. Ryberg M, Nielsen D, Skovsgaard T, Hansen J, Jensen BV, Dombrowsky P. Epirubicin cardiotoxicity: an analysis of 469 patients with metastatic breast cancer. *J.Clin Oncol* 1998;16:3502-8.
  397. Fuster V, Gersh BJ, Giuliani ER, Tajik AJ, Brandenburg RO, Frye RL. The natural history of idiopathic dilated cardiomyopathy. *Am J Cardiol.* 1981;47:525-31.
  398. Wilson JR, Schwartz JS, Sutton MS, Ferraro N, Horowitz LN, Reichek N et al. Prognosis in severe heart failure: relation to hemodynamic measurements and ventricular ectopic activity. *J.Am Coll.Cardiol.* 1983;2:403-10.
  399. Flather MD, Yusuf S, Kober L, Pfeffer M, Hall A, Murray G et al. Long-term ACE-inhibitor therapy in patients with heart failure or left-ventricular dysfunction: a systematic overview of data from individual patients. ACE-Inhibitor Myocardial Infarction Collaborative Group. *Lancet* 2000;355:1575-81.
  400. Jensen BV, Nielsen SL. Losartan versus captopril in elderly patients with heart failure. *Lancet* 1997;349:1473.
  401. Hui YF, Reitz J. Gemcitabine: a cytidine analogue active against solid tumors. *Am.J.Health Syst.Pharm.* 1997;54:162-70.
  402. Plunkett W, Huang P, Xu YZ, Heinemann V, Grunewald R, Gandhi V. Gemcitabine: metabolism, mechanisms of action, and self-potentialiation. *Semin.Oncol.* 1995;22:3-10.
  403. Noble S, Goa KL. Gemcitabine. A review of its pharmacology and clinical potential in non-small cell lung cancer and pancreatic cancer. *Drugs* 1997;54:447-72.
  404. Tonato M, Mosconi AM, Martin C. Safety profile of gemcitabine. *Anticancer Drugs* 1995;6 Suppl 6:27-32.
  405. Adami HO, Bergstrom R, Weiderpass E, Persson I, Barlow L, McLaughlin JK. Risk for endometrial cancer following breast cancer: a prospective study in Sweden. *Cancer Causes.Control.* 1997;8:821-7.
  406. Katase K, Sugiyama Y, Hasumi K, Yoshimoto M, Kasumi F. The incidence of subsequent endometrial carcinoma with tamoxifen use in patients with primary breast carcinoma. *Cancer* 1998;82:1698-703.
  407. Campos SM. Aromatase inhibitors for breast cancer in postmenopausal women. *Oncologist.* 2004;9:126-36.
  408. Jonat W, Howell A, Blomqvist C, Eiermann W, Winblad G, Tyrrell C et al. A randomised trial comparing two doses of the new selective aromatase inhibitor anastrozole (Arimidex) with megestrol acetate in postmenopausal patients with advanced breast cancer. *Eur.J.Cancer* 1996;32A:404-12.
  409. Buzdar AU, Jones SE, Vogel CL, Wolter J, Plourde P, Webster A. A phase III trial comparing anastrozole (1 and 10 milligrams), a potent and selective aromatase inhibitor, with megestrol acetate in postmenopausal women with advanced breast carcinoma. Arimidex Study Group. *Cancer* 1997;79:730-9.
  410. Buzdar AU, Jonat W, Howell A, Jones SE, Blomqvist CP, Vogel CL et al. Anastrozole versus megestrol acetate in the treatment of postmenopausal women with advanced breast carcinoma: results of a survival update based on a combined analysis of data from two mature phase III trials. Arimidex Study Group. *Cancer* 1998;83:1142-52.
  411. Nabholz JM, Buzdar A, Pollak M, Harwin W, Burton G, Mangalik A et al. Anastrozole is superior to tamoxifen as first-line therapy for advanced breast cancer in postmenopausal women: results of a North American multicenter randomized trial. Arimidex Study Group. *J.Clin.Oncol.* 2000;18:3758-67.
  412. Bonnetterre J, Thurlimann B, Robertson JF, Krzakowski M, Mauriac L, Koralewski P et al. Anastrozole versus tamoxifen as first-line therapy for advanced breast cancer in 668 postmenopausal women: results of the Tamoxifen or Arimidex Randomized Group Efficacy and Tolerability study. *J.Clin.Oncol.* 2000;18:3748-57.
  413. Bonnetterre J, Buzdar A, Nabholz JM, Robertson JF, Thurlimann B, von Euler M et al. Anastrozole is superior to tamoxifen as first-line therapy in hormone receptor positive advanced breast carcinoma. *Cancer* 2001;92:2247-58.
  414. Winer EP, Hudis C, Burstein HJ, Wolff AC, Pritchard KI, Ingle JN et al. American Society of Clinical Oncology Technology Assessment on the Use of Aromatase Inhibitors As Adjuvant Therapy for Postmenopausal Women With Hormone Receptor-Positive Breast Cancer: Status Report 2004. *J.Clin.Oncol.* 2004.
  415. Rogers MJ, Gordon S, Benford HL, Coxon FP, Luckman SP, Monkkonen J et al. Cellular and molecular mechanisms of action of bisphosphonates. *Cancer* 2000;88:2961-78.
  416. Benford HL, Frith JC, Auriola S, Monkkonen J, Rogers MJ. Farnesol and geranylgeraniol prevent activation of caspases by aminobisphosphonates: biochemical evidence for two distinct pharmacological classes of bisphosphonate drugs. *Mol.Pharmacol.* 1999;56:131-40.
  417. Teitelbaum SL. Bone resorption by osteoclasts. *Science* 2000;289:1504-8.
  418. Monkkonen J, Simila J, Rogers MJ. Effects of tiludronate and ibandronate on the secretion of proinflammatory cytokines and nitric oxide from macrophages in vitro. *Life Sci.* 1998;62:L95-102.
  419. Derenne S, Amiot M, Barille S, Collette M, Robillard N, Berthaud P et al. Zoledronate is a potent inhibitor of myeloma



- cell growth and secretion of IL-6 and MMP-1 by the tumoral environment. *J.Bone Miner.Res* 1999;14:2048-56.
420. Lee MV, Fong EM, Singer FR, Guenette RS. Bisphosphonate treatment inhibits the growth of prostate cancer cells. *Cancer Res* 2001;61:2602-8.
  421. Senaratne SG, Pirianov G, Mansi JL, Arnett TR, Colston KW. Bisphosphonates induce apoptosis in human breast cancer cell lines. *Br.J.Cancer* 2000;82:1459-68.
  422. Tassone P, Forciniti S, Galea E, Morrone G, Turco MC, Martinelli V et al. Growth inhibition and synergistic induction of apoptosis by zoledronate and dexamethasone in human myeloma cell lines. *Leukemia* 2000;14:841-4.
  423. Green JR. Bisphosphonates: preclinical review. *Oncologist*. 2004;9 Suppl 4:3-13.
  424. Boissier S, Magnetto S, Frappart L, Cuzin B, Ebetino FH, Delmas PD et al. Bisphosphonates inhibit prostate and breast carcinoma cell adhesion to unmineralized and mineralized bone extracellular matrices. *Cancer Res* 1997;57:3890-4.
  425. Shinoda H, Adamek G, Felix R, Fleisch H, Schenk R, Hagan P. Structure-activity relationships of various bisphosphonates. *Calcif.Tissue Int.* 1983;35:87-99.
  426. Green JR, Muller K, Jaeggi KA. Preclinical pharmacology of CGP 42'446, a new, potent, heterocyclic bisphosphonate compound. *J.Bone Miner.Res* 1994;9:745-51.
  427. Bounameaux HM, Schifferli J, Montani JP, Jung A, Chatelanat F. Renal failure associated with intravenous diphosphonates. *Lancet* 1983;1:471.
  428. Kanis JA, Preston CJ, Yates AJ, Percival RC, Mundy KI, Russell RG. Effects of intravenous diphosphonates on renal function. *Lancet* 1983;1:1328.
  429. Ibrahim A, Scher N, Williams G, Sridhara R, Li N, Chen G et al. Approval summary for zoledronic acid for treatment of multiple myeloma and cancer bone metastases. *Clin.Cancer Res* 2003;9:2394-9.
  430. Kaufmann M, Jonat W, Kleeberg U, Eiermann W, Janicke F, Hilfrich J et al. Goserelin, a depot gonadotrophin-releasing hormone agonist in the treatment of premenopausal patients with metastatic breast cancer. German Zoladex Trial Group. *J Clin.Oncol.* 1989;7:1113-9.
  431. Taylor CW, Green S, Dalton WS, Martino S, Rector D, Ingle JN et al. Multicenter randomized clinical trial of goserelin versus surgical ovariectomy in premenopausal patients with receptor-positive metastatic breast cancer: an intergroup study. *J Clin.Oncol.* 1998;16:994-9.
  432. Ozer H, Armitage JO, Bennett CL, Crawford J., Demetri GD, Pizzo PA et al. 2000 Update of Recommendations for the Use of Hematopoietic Colony-Stimulating Factors: Evidence-Based, Clinical Practice Guidelines. *J Clin.Oncol.* 2000;18:3558-85.
  433. Buchholz TA, Austin-Seymour MM, Moe RE, Ellis GK, Livingston RB, Pelton JG et al. Effect of delay in radiation in the combined modality treatment of breast cancer. *Int.J.Radiat.Oncol.Biol.Phys.* 1993;26:23-35.
  434. Recht A, Come SE, Henderson IC, Gelman RS, Silver B, Hayes DF et al. The sequencing of chemotherapy and radiation therapy after conservative surgery for early-stage breast cancer. *N.Engl.J.Med.* 1996;334:1356-61.
  435. Janni W, Dimpfl T, Rjosk D, Bergauer F, Peschers U, Lampe B et al. Matched Pair Analysis of Survival After Chest Wall Recurrence compared to Mammary Recurrence: A Long-term Follow-up. *Int.J.Radiat.Oncol.Biol.Phys.* 2001;127:455-62.
  436. Kuske RR. Adjuvant chest wall and nodal irradiation: maximize cure, minimize late cardiac toxicity. *J.Clin.Oncol.* 1998;16:2579-82.
  437. Ewers SB, Attewell R, Baldetorp B, Borg A, Ferno M, Langstrom E et al. Flow cytometry DNA analysis and prediction of loco-regional recurrences after mastectomy in breast cancer. *Acta Oncol.* 1992;31:733-40.
  438. Marks LB, Halperin EC, Prosnitz LR, Ross M, Vredenburgh JJ, Rosner GL et al. Post-mastectomy radiotherapy following adjuvant chemotherapy and autologous bone marrow transplantation for breast cancer patients with greater than or equal to 10 positive axillary lymph nodes. Cancer and Leukemia Group B. *Int.J.Radiat.Oncol.Biol.Phys.* 1992;23:1021-6.
  439. Lacour J, Bucalossi P, Cacers E, Jacobelli G, Koszarowski T, Le M et al. Radical mastectomy versus radical mastectomy plus internal mammary dissection. Five-year results of an international cooperative study. *Cancer* 1976;37:206-14.
  440. Veronesi U, Valagussa P. Inefficacy of internal mammary nodes dissection in breast cancer surgery. *Cancer* 1981;47:170-5.
  441. Noguchi M, Taniya T, Koyasaki N, Miyazaki I. A multivariate analysis of en bloc extended radical mastectomy versus conventional radical mastectomy in operable breast cancer. *Int.Surg.* 1992;77:48-54.
  442. Noguchi M, Ohta N, Thomas M, Kitagawa H, Miyazaki I. Risk of internal mammary lymph node metastases and its prognostic value in breast cancer patients. *J.Surg.Oncol.* 1993;52:26-30.
  443. Fisher B, Redmond C, Fisher ER, Bauer M, Wolmark N, Wickerham DL et al. Ten-year results of a randomized clinical trial comparing radical mastectomy and total mastectomy with or without radiation. *N.Engl.J.Med.* 1985;312:674-81.
  444. Langlands AO, Prescott RJ, Hamilton T. A clinical trial in the management of operable cancer of the breast. *Br.J.Surg.* 1980;67:170-4.
  445. Cascinelli N, Greco M, Bufalino R, Clemente C, Galluzzo D, delle-Donne V et al. Prognosis of breast cancer with axillary node metastases after surgical treatment only. *Eur.J.Cancer Clin.Oncol.* 1987;23:795-9.
  446. Veronesi U, Marubini E, Mariani L, Valagussa P, Zucali R. The dissection of internal mammary nodes does not improve the survival of breast cancer patients. 30-year results of a randomised trial. *Eur.J.Cancer* 1999;35:1320-5.
  447. Romestaing P, Lehingue Y, Carrie C, Coquard R, Montbarbon X, Ardiet JM et al. Role of a 10-Gy boost in the conservative treatment of early breast cancer: results of a randomized clinical trial in Lyon, France. *J.Clin.Oncol.* 1997;15:963-8.
  448. Galinsky DL, Sharma M, Hartsell WF, Griem KL, Murthy A. Primary radiation therapy to T1 and T2 breast cancer following conservative surgery. Which patients should be boosted? *Am.J.Clin.Oncol.* 1994;17:60-3.
  449. Konecny G, Nestle KC, Untch M. [Use of G-CSF in dose-intensified chemotherapy of breast cancer with FEC (500/75/500 mg/m2 KO) in the adjuvant and metastatic situation]  
Einsatz von G-CSF bei dosisintensivierter Chemotherapie des Mammakarzinoms mit FEC (500/75/500 mg/m2 KO) in der adjuvanten und metastasierten Situation. *Gynakol.Geburtshilfliche.Rundsch.* 1993;33 Suppl 1:301-2.
  450. Dunn CJ, Goa KL. Lenograstim: an update of its pharmacological properties and use in chemotherapy-induced



- neutropenia and related clinical settings. *Drugs* 2000;59:681-717.
451. Hoglund M. Glycosylated and non-glycosylated recombinant human granulocyte colony-stimulating factor (rhG-CSF)-- what is the difference? *Med.Oncol.* 1998;15:229-33.
  452. Volkova MA. [Granulocytic colony-stimulation factor granulocyte and its clinical application]. *Ter.Arkh.* 1998;70:80-4.
  453. Frampton JE, Yarker YE, Goa KL. Lenograstim. A review of its pharmacological properties and therapeutic efficacy in neutropenia and related clinical settings. *Drugs* 1995;49:767-93.
  454. Martin-Christin F. Granulocyte colony stimulating factors: how different are they? How to make a decision? *Anticancer Drugs* 2001;12:185-91.
  455. Soukop M, McQuade B, Hunter E, et al. Ondansetron compared with metoclopramide in the control of emesis and quality of life during repeated chemotherapy for breast cancer. *Oncology* 1992;49:195-204.
  456. Morrow GR, Hickok JT, Rosenthal SN. Progress in reducing nausea and emesis. Comparisons of ondansetron (Zofran), granisetron (Kytril), and tropisetron (Navoban). *Cancer* 1995;76:343-57.
  457. Brunsch U, Drechsler S, Eggert J, et al. Prevention of chemotherapy-induced nausea and vomiting by tropisetron alone or in combination with other antiemetic drugs. *Sem Oncol* 1994;21:7-11.
  458. Drechsler S, Bauer R. 5-HT<sub>3</sub>-Rezeptorantagonisten - Der Weg zum therapeutischen Fortschritt in der supportiven Tumorthherapie. *Arzneimitteltherapie* 1995;13:224-35.
  459. Green S, Weiss GR. Southwest Oncology Group standard response criteria, endpoint definitions and toxicity criteria. *Invest New Drugs* 1992;10:239-53.
  460. Genz Th, Schaller G. Das Rezidiv beim Mammakarzinom. *Krebsmedizin* 1990;11:15-8.
  461. Aaronson NK, Ahmedzai S, Bergman B, Bullinger M, Cull A, Duez NJ et al. The European Organization for Research and Treatment of Cancer QLQ-C30: a quality-of-life instrument for use in international clinical trials in oncology. *J Natl.Cancer Inst.* 1993;85:365-76.
  462. DeMets DL, Lan KK. Interim analysis: the alpha spending function approach. *Stat.Med.* 1994;13:1341-52.
  463. O'Brien PC, Fleming TR. A multiple testing procedure for clinical trials. *Biometrics* 1979;35:549-56.
  464. O'Shaughnessy JA, Wittes RE, Burke G, Friedman MA, Johnson JR, Niederhuber JE et al. Commentary concerning demonstration of safety and efficacy of investigational anticancer agents in clinical trials. *J.Clin.Oncol.* 1991;9:2225-32.
  465. Wittes RE. How we know what we (think we) know. *J.Clin.Oncol.* 1986;4:827-9.
  466. Cox DR. Regression models and life tables. *J R Stat Soc B* 1972;34:187-220.
  467. O'Brien, P. C. and Fleming, T. R. A multiple testing procedure for clinical trials. *Biometrics* 35, 349-556. 1979.
- Ref Type: Generic



Supplement: jamaoncol-e211854-s001.pdf [file jamaoncol-e211854-s001.pdf]
