# Supplementary material
Source: PubMed Central journal article supplement (PMC8227465)
Supplement: jamaoncol-e211854-s003.pdf [file jamaoncol-e211854-s003.pdf]

# Data Sharing Statement

Friedl. Prognosis of Patients With Early Breast Cancer Receiving 5 Years vs 2 Years of Adjuvant Bisphosphonate Treatment. *JAMA Oncol.* Published June 24, 2021. doi:10.1001/jamaoncol.2021.1854

## Data

**Data available:** Yes

**Data types:** Deidentified participant data, Data dictionary

**How to access data:** De-identified data will be made available to other researchers, subject to approval of a formal data access request that includes a detailed description of the purpose/scientific rationale of the proposed project. Requests are reviewed by the SUCCESS study group Steering Committee and will be approved if the proposed projects have a sound scientific or patient benefit rationale. Data recipients are required to sign a formal data sharing agreement which describes the conditions for release and requirements for data transfer, storage, archiving, publication and intellectual property. Data will be available beginning 9 months and ending 5 years following article publication. Additional documents (e.g., full study protocol, informed consent form) are available from the clinical trial website of the SUCCESS study group at <http://www.success-studie.de/a/index.htm>.

**When available:** With publication

## Supporting Documents

**Document types:** None

## Additional Information

**Who can access the data:** De-identified data will be made available to other researchers, subject to approval of a formal data access request that includes a detailed description of the purpose/scientific rationale of the proposed project. Requests are reviewed by the SUCCESS study group Steering Committee and will be approved if the proposed projects have a sound scientific or patient benefit rationale. Data recipients are required to sign a formal data sharing agreement which describes the conditions for release and requirements for data transfer, storage, archiving, publication and intellectual property.

**Types of analyses:** De-identified data will be made available to other researchers, subject to approval of a formal data access request that includes a detailed description of the purpose/scientific rationale of the proposed project. Requests are reviewed by the SUCCESS study group Steering Committee and will be approved if the proposed projects have

a sound scientific or patient benefit rationale. Data recipients are required to sign a formal data sharing agreement which describes the conditions for release and requirements for data transfer, storage, archiving, publication and intellectual property.

**Mechanisms of data availability:** De-identified data will be made available to other researchers, subject to approval of a formal data access request that includes a detailed description of the purpose/scientific rationale of the proposed project. Requests are reviewed by the SUCCESS study group Steering Committee and will be approved if the proposed projects have a sound scientific or patient benefit rationale. Data recipients are required to sign a formal data sharing agreement which describes the conditions for release and requirements for data transfer, storage, archiving, publication and intellectual property.

**Any additional restrictions:** Data will be available beginning 9 months and ending 5 years following article publication.
